# Supplementary material for: A new mib allele with a chromosomal deletion covering foxc1a exhibits anterior somite specification defect
Source: PubMed Central journal article supplement (PMC4454137; doi:10.1038/srep10673), 2015-06-03
Supplement: srep10673-s1.pdf [file srep10673-s1.pdf]

Supplementary information:

**A new *mib* allele with a chromosomal deletion covering *foxc1a* exhibits anterior somite specification defect**

Chia-Hao Hsu<sup>1,2</sup>, Ji-Sheng Lin<sup>1</sup>, Keng Po Lai<sup>3</sup>, Jing-Woei Li<sup>4</sup>, Ting-Fung Chan<sup>4</sup>, May-Su You<sup>1</sup>, William Ka Fai Tse<sup>5</sup> and Yun-Jin Jiang<sup>\*,1,6,7</sup>

<sup>1</sup>Institute of Molecular and Genomic Medicine, National Health Research Institutes, Taiwan

<sup>2</sup>Institute of Bioinformatics and Structural Biology, National Tsing Hua University, Taiwan

<sup>3</sup>School of Biological Sciences, The University of Hong Kong, Hong Kong

<sup>4</sup>School of Life Sciences, Hong Kong Bioinformatics Centre, The Chinese University of Hong Kong, Hong Kong

<sup>5</sup>Department of Biology, Hong Kong Baptist University, Hong Kong

<sup>6</sup>Biotechnology Center, National Chung Hsing University, Taiwan

<sup>7</sup>Institute of Molecular and Cellular Biology, National Taiwan University, Taiwan

Table S1. Percentage of embryos showing nn2002 homozygous phenotype from each clutch.

| Clutch no.   | no. of embryos showing early segmentation phenotype | no. of embryos showing no segmentation phenotype | ratio of homozygotes |
|--------------|-----------------------------------------------------|--------------------------------------------------|----------------------|
| 1            | 21                                                  | 78                                               | 21%                  |
| 2            | 16                                                  | 64                                               | 20%                  |
| 3            | 14                                                  | 58                                               | 19%                  |
| 4            | 19                                                  | 65                                               | 23%                  |
| 5            | 44                                                  | 151                                              | 23%                  |
| 6            | 11                                                  | 23                                               | 32%                  |
| <b>Total</b> | <b>125</b>                                          | <b>439</b>                                       | <b>22%</b>           |

Table S2. Percentage of embryos showing transheterozygous (ta52b/nn2002) phenotypes from each clutch.

| Clutch no.   | no. of transheterozygotes from $mib^{ta52b} \text{♀} \times mib^{nn2002} \text{♂}$ | no. of total embryos | ratio of transheterozygotes | no. of transheterozygotes from $mib^{nn2002} \text{♀} \times mib^{ta52b} \text{♂}$ | no. of total embryos | ratio of transheterozygotes |
|--------------|------------------------------------------------------------------------------------|----------------------|-----------------------------|------------------------------------------------------------------------------------|----------------------|-----------------------------|
| 1            | 45                                                                                 | 158                  | 28%                         |                                                                                    |                      |                             |
| 2            | 24                                                                                 | 118                  | 20%                         |                                                                                    |                      |                             |
| 3            | 5                                                                                  | 21                   | 24%                         |                                                                                    |                      |                             |
| 4            | 17                                                                                 | 57                   | 30%                         |                                                                                    |                      |                             |
| 5            |                                                                                    |                      |                             | 2                                                                                  | 6                    | 33%                         |
| 6            | 11                                                                                 | 59                   | 19%                         |                                                                                    |                      |                             |
| 7            | 29                                                                                 | 102                  | 28%                         |                                                                                    |                      |                             |
| 8            | 41                                                                                 | 145                  | 28%                         |                                                                                    |                      |                             |
| 9            | 12                                                                                 | 35                   | 34%                         |                                                                                    |                      |                             |
| 10           |                                                                                    |                      |                             | 51                                                                                 | 198                  | 26%                         |
| 11           | 23                                                                                 | 82                   | 28%                         |                                                                                    |                      |                             |
| 12           | 24                                                                                 | 105                  | 23%                         |                                                                                    |                      |                             |
| 13           | 27                                                                                 | 115                  | 23%                         |                                                                                    |                      |                             |
| 14           | 35                                                                                 | 175                  | 20%                         |                                                                                    |                      |                             |
| 15           | 36                                                                                 | 179                  | 20%                         |                                                                                    |                      |                             |
| 16           | 62                                                                                 | 274                  | 23%                         |                                                                                    |                      |                             |
| 17           | 31                                                                                 | 143                  | 22%                         |                                                                                    |                      |                             |
| 18           | 14                                                                                 | 43                   | 33%                         |                                                                                    |                      |                             |
| 19           |                                                                                    |                      |                             | 63                                                                                 | 205                  | 31%                         |
| 20           |                                                                                    |                      |                             | 11                                                                                 | 37                   | 30%                         |
| 21           |                                                                                    |                      |                             | 42                                                                                 | 177                  | 24%                         |
| 22           |                                                                                    |                      |                             | 66                                                                                 | 268                  | 25%                         |
| 23           |                                                                                    |                      |                             | 54                                                                                 | 219                  | 25%                         |
| <b>Total</b> | <b>436</b>                                                                         | <b>1811</b>          | <b>24%</b>                  | <b>289</b>                                                                         | <b>1110</b>          | <b>26%</b>                  |

Table S3. List of genes in LG2 and their relative expression in wild type embryos (AB) and *mib* mutants (2002).

| Feature ID          | AB1<br>Expression<br>values | AB 2<br>Expression<br>values | AB3<br>Expression<br>values | 2002-1<br>Expression<br>values | 2002-2<br>Expression<br>values | 2002-3<br>Expression<br>values | Chromosome | Chromosome<br>e region<br>start | Chromosome<br>e region<br>end |
|---------------------|-----------------------------|------------------------------|-----------------------------|--------------------------------|--------------------------------|--------------------------------|------------|---------------------------------|-------------------------------|
| ZNF554 (5 of 5)     | 0                           | 0.4499938                    | 0                           | 0                              | 0                              | 0                              | 2          | 19233                           | 21298                         |
| CABZ01092286.1      | 3.6315475                   | 10.712303                    | 6.9913215                   | 0                              | 0                              | 0                              | 2          | 23916                           | 32332                         |
| CABZ01090951.1      | 2.5127515                   | 2.0062799                    | 1.0365979                   | 0                              | 0                              | 0                              | 2          | 50561                           | 53808                         |
| CABZ01084950.1      | 6.6380348                   | 13.60351                     | 12.459818                   | 0                              | 0                              | 0                              | 2          | 60855                           | 62944                         |
| CABZ01084952.1      | 0                           | 0                            | 0                           | 0                              | 0                              | 0                              | 2          | 73298                           | 80311                         |
| zgc:158345          | 18.337346                   | 15.903438                    | 23.73781                    | 0                              | 0                              | 0                              | 2          | 81941                           | 87436                         |
| cldn1               | 4.4232592                   | 8.9273643                    | 13.837681                   | 0                              | 0                              | 0                              | 2          | 88773                           | 91785                         |
| CPN2                | 9.2958934                   | 14.239643                    | 11.632473                   | 0                              | 0                              | 0                              | 2          | 93928                           | 97276                         |
| ANGPTL1 (2 of 2)    | 0                           | 0                            | 0                           | 0                              | 0                              | 0                              | 2          | 108647                          | 114343                        |
| CABZ01085888.1      | 11.678024                   | 8.702582                     | 16.861577                   | 0                              | 0                              | 0                              | 2          | 115939                          | 151915                        |
| fggy                | 7.3862678                   | 6.6346734                    | 7.6177345                   | 0                              | 0                              | 1.4793259                      | 2          | 154495                          | 158192                        |
| znf12a              | 69.331429                   | 74.93296                     | 57.75331                    | 0                              | 0                              | 0                              | 2          | 161051                          | 164976                        |
| igfbp1b             | 0                           | 0.3346374                    | 0                           | 0                              | 0                              | 0                              | 2          | 167258                          | 170770                        |
| adcy1b              | 0                           | 0                            | 0                           | 0                              | 0                              | 0                              | 2          | 179198                          | 199691                        |
| MOV10L1             | 0.3377878                   | 0.786634                     | 0.975445                    | 0                              | 0                              | 0                              | 2          | 200138                          | 211977                        |
| zgc:171570          | 3.0876964                   | 2.4927312                    | 3.8638077                   | 0                              | 0                              | 0                              | 2          | 221432                          | 246482                        |
| zgc:113293          | 0                           | 0                            | 0                           | 0                              | 0                              | 0                              | 2          | 250271                          | 255471                        |
| DHX30               | 1.9104279                   | 1.7795878                    | 2.2067313                   | 0                              | 0                              | 0                              | 2          | 256480                          | 277540                        |
| CABZ01064861.1      | 0                           | 0.3278235                    | 0                           | 0                              | 0                              | 0                              | 2          | 282825                          | 287502                        |
| PHLPP1              | 0.8673863                   | 0.5386542                    | 1.6698603                   | 0                              | 0                              | 0                              | 2          | 290248                          | 301002                        |
| wu:fi19a06          | 0                           | 0.4998397                    | 0                           | 0                              | 0                              | 0                              | 2          | 304364                          | 314202                        |
| CU928013.2          | 2.7183719                   | 2.6728755                    | 3.7069276                   | 0                              | 0                              | 0                              | 2          | 319490                          | 340465                        |
| zgc:113452          | 5.7539346                   | 5.1781727                    | 4.5060053                   | 0                              | 0                              | 0                              | 2          | 334714                          | 346967                        |
| CU693494.2          | 0                           | 0                            | 0                           | 0                              | 0                              | 0                              | 2          | 372564                          | 373196                        |
| SHARPIN (2 of 2)    | 0                           | 0.4013795                    | 0.6221501                   | 0                              | 0                              | 0                              | 2          | 377851                          | 385099                        |
| CU693494.3          | 0.1015127                   | 0.9456036                    | 1.0259996                   | 0                              | 0                              | 0                              | 2          | 387136                          | 392836                        |
| wnip1               | 1.6606899                   | 1.1602152                    | 1.4986402                   | 0                              | 0                              | 0                              | 2          | 394830                          | 410278                        |
| MYLK4 (1 of 2)      | 1.2608858                   | 0.4698124                    | 0.7282233                   | 0                              | 0                              | 0                              | 2          | 427011                          | 447851                        |
| CABZ01064012.1      | 0                           | 0                            | 0                           | 0                              | 0                              | 0                              | 2          | 689562                          | 790847                        |
| foxc1a              | 16.336109                   | 14.216155                    | 18.000801                   | 0                              | 0                              | 0                              | 2          | 868219                          | 870389                        |
| CU856140.1          | 0.8288701                   | 0                            | 0                           | 0                              | 0                              | 0                              | 2          | 878904                          | 888438                        |
| Foxf2a              | 1.8110757                   | 2.53056                      | 1.7433082                   | 0                              | 0                              | 0                              | 2          | 895049                          | 897768                        |
| foxq1a              | 2.0006596                   | 3.2613695                    | 2.8886972                   | 0                              | 0                              | 0                              | 2          | 902565                          | 903497                        |
| irf4a               | 0.2857648                   | 0                            | 0.4126078                   | 0                              | 0                              | 0                              | 2          | 1038215                         | 1063571                       |
| dusp22b             | 0.3251943                   | 0.9087679                    | 0.4695391                   | 0                              | 0                              | 0                              | 2          | 1065725                         | 1082670                       |
| ripk1l              | 4.2831927                   | 3.1918786                    | 3.0921919                   | 0                              | 0                              | 0                              | 2          | 1088190                         | 1104351                       |
| si:ch211-241e1.5    | 1.9021217                   | 1.476542                     | 1.6783684                   | 0                              | 0                              | 0                              | 2          | 1119723                         | 1128678                       |
| si:ch211-241e1.3    | 0                           | 0                            | 0                           | 0                              | 0                              | 0                              | 2          | 1128112                         | 1169253                       |
| si:ch211-241e1.4    | 0                           | 0                            | 0                           | 0                              | 0                              | 0                              | 2          | 1131839                         | 1134018                       |
| si:ch211-241e1.2    | 0.1655388                   | 0                            | 0                           | 0                              | 0                              | 0                              | 2          | 1185863                         | 1268105                       |
| polr2d              | 149.96869                   | 121.26047                    | 129.70156                   | 0                              | 0                              | 0                              | 2          | 1308283                         | 1313492                       |
| CABZ01084564.1      | 0                           | 0                            | 0                           | 0                              | 0                              | 0                              | 2          | 1358788                         | 1372630                       |
| OSBPL1A (2 of 2)    | 0.3535256                   | 0                            | 0.5104459                   | 0                              | 0                              | 0                              | 2          | 1386360                         | 1401154                       |
| ABCF3               | 24.004828                   | 21.913585                    | 24.261936                   | 0                              | 0                              | 0                              | 2          | 1402471                         | 1409711                       |
| prkacbb (2 1411669) | 6.349032                    | 6.093422                     | 11.528438                   | 0                              | 0                              | 0                              | 2          | 1411670                         | 1439425                       |
| CU467642.1          | 5.8150012                   | 7.3126088                    | 9.2357318                   | 0                              | 0                              | 0                              | 2          | 1522259                         | 1622366                       |
| LPHN2 (1 of 4)      | 8.5346722                   | 6.6678721                    | 9.9378851                   | 0                              | 0                              | 0                              | 2          | 1626935                         | 1688776                       |
| FP102463.1          | 3.5219158                   | 2.4605319                    | 2.1188321                   | 0                              | 0                              | 0                              | 2          | 1691997                         | 1695667                       |
| exosc4              | 29.205547                   | 40.808005                    | 26.584857                   | 0                              | 0                              | 0                              | 2          | 1709545                         | 1713492                       |
| FP245444.1          | 6.8854209                   | 12.413916                    | 11.545164                   | 0                              | 0                              | 0                              | 2          | 1727339                         | 1743445                       |
| BCL10               | 1.0477774                   | 0.9760179                    | 1.1346426                   | 0                              | 0                              | 0                              | 2          | 1747679                         | 1756376                       |
| MCOLN3 (1 of 2)     | 1.4349749                   | 2.4060552                    | 3.7294573                   | 0                              | 0                              | 0                              | 2          | 1760876                         | 1787181                       |
| ssx2ip              | 3.8780098                   | 1.3761582                    | 1.5998147                   | 0                              | 0                              | 0                              | 2          | 1792049                         | 1810559                       |
| zgc:112335          | 0.5858805                   | 2.7287757                    | 3.8067153                   | 0                              | 0                              | 0                              | 2          | 1812389                         | 1822105                       |
| SLC22A23 (3 of 3)   | 2.4206828                   | 3.5702531                    | 4.6602094                   | 0                              | 0                              | 0                              | 2          | 1823446                         | 1897681                       |
| 5S_rRNA (2 182444)  | 0                           | 0                            | 0                           | 0                              | 0                              | 0                              | 2          | 1824450                         | 1824564                       |
| FP243387.1          | 0                           | 0                            | 0                           | 0                              | 0                              | 0                              | 2          | 1856129                         | 1856224                       |
| dspa                | 19.497449                   | 23.782491                    | 26.538543                   | 0                              | 0                              | 0                              | 2          | 1912379                         | 1964899                       |
| higl                | 10.291989                   | 15.432922                    | 17.759893                   | 0                              | 0                              | 0                              | 2          | 1970655                         | 1975857                       |
| si:ch211-163f10.4   | 0                           | 0                            | 0                           | 0                              | 0                              | 0                              | 2          | 1973479                         | 1974747                       |
| CCDC13              | 0.6076222                   | 0.5660078                    | 0.8773289                   | 0                              | 0                              | 0                              | 2          | 1983827                         | 2009351                       |

|                      |           |           |           |          |           |           |   |         |         |
|----------------------|-----------|-----------|-----------|----------|-----------|-----------|---|---------|---------|
| tmie                 | 0         | 0         | 0         | 0        | 0         | 0         | 2 | 2025945 | 2081419 |
| pth1ra               | 0         | 0.6168789 | 0         | 0        | 0         | 0         | 2 | 2092256 | 2240623 |
| mir460               | 0         | 0         | 0         | 0        | 0         | 0         | 2 | 2103466 | 2103542 |
| ss18                 | 48.369846 | 54.92678  | 48.555349 | 0        | 0         | 0         | 2 | 2368246 | 2384584 |
| FP236168.1           | 2.1371128 | 4.5502803 | 6.8326618 | 0        | 0         | 0         | 2 | 2392229 | 2424395 |
| FP102801.1 (2 2428)  | 0.1011606 | 0         | 0         | 0        | 0         | 0         | 2 | 2428046 | 2446159 |
| rpe65a               | 0.8027302 | 0         | 0.7726934 | 0        | 0         | 0         | 2 | 2448547 | 2463377 |
| FP102801.1 (2 2472)  | 3.7877748 | 8.7032883 | 6.1982719 | 0        | 0         | 0         | 2 | 2472964 | 2488188 |
| si:ch211-188c16.1    | 0         | 0.1610574 | 0.2496438 | 0        | 0.1566048 | 0         | 2 | 2490000 | 2505953 |
| c8a                  | 9.1500755 | 9.7410413 | 11.638739 | 0        | 0         | 0         | 2 | 2506994 | 2523112 |
| c8b                  | 9.3984576 | 10.467674 | 11.505147 | 0        | 0         | 0         | 2 | 2519755 | 2533944 |
| dab1b                | 0         | 0.504871  | 0.2608551 | 0        | 0         | 0         | 2 | 2542265 | 2589205 |
| si:ch211-188c16.4    | 0         | 0         | 0         | 0        | 0         | 0         | 2 | 2543103 | 2547948 |
| prkacbb (2 2614676)  | 1.007496  | 2.6448504 | 2.6449013 | 0        | 0         | 0         | 2 | 2614677 | 2642068 |
| zgc:66286            | 197.97436 | 178.77025 | 182.30211 | 0        | 0         | 0         | 2 | 2654111 | 2659244 |
| CRHR2                | 0         | 0         | 0         | 0        | 0         | 0         | 2 | 2681130 | 2785846 |
| aqpl.a.1             | 1.9840725 | 1.4785509 | 2.291798  | 0        | 0         | 0         | 2 | 2888643 | 2900295 |
| aqpl.a.2             | 0         | 0         | 0         | 0        | 0         | 0         | 2 | 2912958 | 2917596 |
| thoc1                | 61.949203 | 64.445908 | 62.67801  | 0        | 0         | 0         | 2 | 2923616 | 2941632 |
| uspl4                | 56.795291 | 63.368194 | 61.503865 | 0        | 0         | 0.297108  | 2 | 2941647 | 2964335 |
| rock1                | 13.554978 | 13.430877 | 14.585248 | 0        | 0         | 0         | 2 | 2970496 | 3052905 |
| eif2b5               | 25.673513 | 26.494293 | 27.983669 | 0        | 0         | 0         | 2 | 3055167 | 3068257 |
| wacb                 | 4.9512345 | 2.3060688 | 2.6808565 | 0        | 0         | 0         | 2 | 3070270 | 3086434 |
| bambib               | 3.3529651 | 3.6745052 | 5.6955927 | 0        | 0         | 0         | 2 | 3091038 | 3098818 |
| adipoqb              | 0         | 0         | 0         | 0        | 0         | 0         | 2 | 3178319 | 3185111 |
| tmtopsa              | 0         | 0         | 0         | 0        | 0         | 0         | 2 | 3255205 | 3340664 |
| CABZ01063645.2       | 0         | 0         | 0         | 0        | 0         | 0         | 2 | 3258302 | 3258383 |
| CABZ01063645.1       | 0         | 0         | 0         | 0        | 0         | 0         | 2 | 3260712 | 3260802 |
| CABZ01088149.2       | 0         | 1.8341518 | 0         | 0        | 0         | 0         | 2 | 3385910 | 3386762 |
| CABZ01088149.1       | 2.7482559 | 2.0480281 | 4.761757  | 0        | 0         | 0         | 2 | 3388619 | 3392143 |
| SERBP1 (2 of 3)      | 73.090362 | 72.972722 | 81.179351 | 0        | 0         | 0         | 2 | 3397407 | 3409194 |
| IPP (1 of 2)         | 1.2855478 | 2.3950081 | 0.9280835 | 0        | 0         | 0         | 2 | 3413431 | 3421555 |
| guk1a                | 13.009744 | 11.064937 | 13.884129 | 0        | 0         | 0         | 2 | 3425900 | 3444870 |
| C2H1orf35            | 7.518766  | 6.2425404 | 6.1360784 | 0        | 0         | 0.4583061 | 2 | 3444090 | 3461887 |
| arf1                 | 64.72169  | 55.83353  | 67.983156 | 0        | 0         | 0         | 2 | 3463796 | 3476115 |
| LRRC52 (2 of 2)      | 0         | 0         | 0         | 0        | 0         | 0         | 2 | 3497699 | 3505613 |
| wu:fi26e04           | 0         | 0         | 0         | 0        | 0         | 0         | 2 | 3508171 | 3530580 |
| pik3r3a              | 9.1626098 | 10.321501 | 10.460645 | 0        | 0         | 0         | 2 | 3546016 | 3567452 |
| ipp                  | 0         | 0.9501508 | 1.472762  | 0        | 0         | 0         | 2 | 3580312 | 3589765 |
| wnt3a                | 1.2750105 | 0.3958961 | 2.4546033 | 0        | 0         | 0         | 2 | 3599278 | 3652698 |
| wnt9a                | 0.4040293 | 0.7527168 | 1.7501003 | 0        | 0         | 0         | 2 | 3695124 | 3764786 |
| 5S_rRNA (2 375137)   | 0         | 0         | 0         | 0        | 0         | 0         | 2 | 3751376 | 3751490 |
| snap47               | 0.437488  | 1.1546559 | 0.9475152 | 0        | 0         | 0         | 2 | 3879432 | 3898088 |
| imjd4                | 2.6275555 | 1.4685607 | 1.8969274 | 0        | 0         | 0         | 2 | 3897559 | 3908363 |
| iba57                | 7.6047294 | 5.4739241 | 4.4919241 | 0        | 0         | 0         | 2 | 3910978 | 3914185 |
| CU633991.1           | 0         | 0         | 0         | 0        | 0         | 0         | 2 | 3922257 | 3923551 |
| cyp8b1               | 0         | 0         | 0         | 0        | 0         | 0         | 2 | 3930186 | 3932157 |
| CU694226.2           | 0         | 0         | 0         | 0        | 0         | 0         | 2 | 3946885 | 3948851 |
| CU694226.1           | 0         | 0         | 0         | 0        | 0         | 0         | 2 | 3962396 | 3964308 |
| cx47.1               | 0         | 0         | 0         | 0        | 0         | 0         | 2 | 3967127 | 3992746 |
| CU694226.3           | 0         | 0         | 0         | 0        | 0         | 0         | 2 | 3990061 | 3990173 |
| SERP1                | 108.21668 | 102.62974 | 105.34575 | 0.561183 | 0         | 0         | 2 | 3996683 | 4003534 |
| FUZ                  | 1.0089813 | 0.9398789 | 1.4568402 | 0        | 0         | 0         | 2 | 4011338 | 4016439 |
| gpt2l                | 13.245633 | 14.309711 | 13.353553 | 0        | 0         | 0         | 2 | 4027400 | 4067295 |
| c1ql3b (2 4089627..) | 0         | 0.3039818 | 0         | 0        | 0         | 0         | 2 | 4089628 | 4092270 |
| pter                 | 1.2944628 | 3.3159734 | 0.4672598 | 0        | 0         | 0         | 2 | 4097884 | 4110658 |
| mmp16b               | 0.1511674 | 0         | 0.2182665 | 0        | 0         | 0         | 2 | 4124602 | 4172324 |
| egfra                | 0.3568859 | 0.6648875 | 1.0305955 | 0        | 0         | 0         | 2 | 4190333 | 4307017 |
| npc1                 | 13.88407  | 19.095981 | 20.85408  | 0        | 0         | 0         | 2 | 4310671 | 4353828 |
| MPP7 (2 of 3)        | 0         | 0         | 0         | 0        | 0         | 0         | 2 | 4358228 | 4380961 |
| phb2                 | 43.882587 | 47.856217 | 37.089281 | 0        | 0         | 0         | 2 | 4408283 | 4429954 |
| PEX5L (2 of 2)       | 0.2709953 | 0.2524355 | 0.3912826 | 0        | 0         | 0         | 2 | 4440346 | 4511292 |
| CABZ01087197.1       | 3.7332308 | 5.7959196 | 7.1870785 | 0        | 0         | 0         | 2 | 4530979 | 4541827 |
| MFN1 (4 of 4)        | 0         | 0         | 0         | 0        | 0         | 0         | 2 | 4552774 | 4574576 |
| mk2b                 | 0.110294  | 0.2054805 | 0.3185009 | 0        | 0         | 0         | 2 | 4622092 | 4686262 |

|                    |           |           |           |   |           |   |   |         |         |
|--------------------|-----------|-----------|-----------|---|-----------|---|---|---------|---------|
| ifr1a              | 3.3503353 | 4.4583997 | 4.3767465 | 0 | 0         | 0 | 2 | 4738019 | 4763716 |
| dlg1l              | 2.9761087 | 1.9658006 | 3.7502149 | 0 | 0         | 0 | 2 | 4788963 | 4963219 |
| CABZ01055591.1     | 0         | 0         | 0         | 0 | 0         | 0 | 2 | 4989926 | 4999272 |
| FAM132B            | 1.8985104 | 0.7073946 | 1.644724  | 0 | 0         | 0 | 2 | 5005145 | 5032086 |
| si:ch1073-184j22.2 | 0.3697733 | 0.4592646 | 0.1779685 | 0 | 0         | 0 | 2 | 5038156 | 5046905 |
| sft2d3             | 15.062694 | 12.951776 | 10.874304 | 0 | 0         | 0 | 2 | 5048645 | 5050255 |
| wdr33              | 29.743353 | 26.312797 | 27.571588 | 0 | 0         | 0 | 2 | 5052822 | 5086135 |
| DUSP28             | 1.7879458 | 0         | 0         | 0 | 0         | 0 | 2 | 5089269 | 5092304 |
| proc               | 0.7346566 | 1.9161573 | 1.9093506 | 0 | 0         | 0 | 2 | 5098931 | 5118311 |
| PROC (2 of 2)      | 1.2944628 | 0         | 0         | 0 | 0         | 0 | 2 | 5110275 | 5118311 |
| saga               | 0         | 0         | 0         | 0 | 0         | 0 | 2 | 5122515 | 5147484 |
| cldn151a           | 0         | 0.4659099 | 0         | 0 | 0         | 0 | 2 | 5150932 | 5159828 |
| crfb16             | 0.6436605 | 0         | 0         | 0 | 0         | 0 | 2 | 5164061 | 5179317 |
| parla              | 1.3847295 | 0.4837099 | 0.7497648 | 0 | 0         | 0 | 2 | 5186291 | 5203409 |
| mb21d2a            | 2.9391039 | 2.2962298 | 1.9165056 | 0 | 0         | 0 | 2 | 5205467 | 5224162 |
| fgf12a             | 0         | 0.1312878 | 0         | 0 | 0         | 0 | 2 | 5229885 | 5324048 |
| cwc25              | 25.537072 | 18.177703 | 17.04473  | 0 | 0         | 0 | 2 | 5351814 | 5366176 |
| sst2               | 1.7315542 | 5.6453762 | 2.5001433 | 0 | 0         | 0 | 2 | 5368743 | 5371233 |
| NYAP2 (2 of 2)     | 0         | 0         | 0.1398482 | 0 | 0         | 0 | 2 | 5377260 | 5418420 |
| slc35d1b           | 9.0697613 | 3.2704248 | 6.33657   | 0 | 0         | 0 | 2 | 5436277 | 5452716 |
| mier1b             | 6.319529  | 4.7324622 | 8.2300255 | 0 | 0         | 0 | 2 | 5453872 | 5478506 |
| dis3l2             | 4.6721773 | 4.6523435 | 5.350298  | 0 | 0         | 0 | 2 | 5483498 | 5527479 |
| ACAP2 (2 of 2)     | 0.5247724 | 0.3666241 | 1.3259827 | 0 | 0         | 0 | 2 | 5530016 | 5566691 |
| si:ch211-168b3.2   | 2.9566242 | 1.8360886 | 0         | 0 | 0         | 0 | 2 | 5569645 | 5572719 |
| tmem125b           | 0         | 0         | 0         | 0 | 0         | 0 | 2 | 5578811 | 5584297 |
| slc1a7a            | 0.4652581 | 0.4333938 | 0.3358866 | 0 | 0         | 0 | 2 | 5590924 | 5642026 |
| scp2a              | 10.3311   | 9.4419743 | 5.6289775 | 0 | 0         | 0 | 2 | 5647589 | 5682147 |
| C2H1orf123         | 55.379514 | 67.897226 | 54.091232 | 0 | 0         | 0 | 2 | 5684429 | 5694226 |
| uck2b              | 74.531433 | 65.132521 | 66.935093 | 0 | 0.2319848 | 0 | 2 | 5694306 | 5707806 |
| aldh9a1b           | 15.621889 | 12.126656 | 15.904881 | 0 | 0         | 0 | 2 | 5709761 | 5734452 |
| zte38              | 0         | 0         | 0         | 0 | 0         | 0 | 2 | 5734448 | 5746425 |
| prdx1              | 31.429103 | 25.457919 | 21.210037 | 0 | 0         | 0 | 2 | 5748881 | 5758078 |
| CU467854.1         | 1.7899052 | 2.1436963 | 1.476797  | 0 | 0         | 0 | 2 | 5769983 | 5791691 |
| CU467854.2         | 0         | 0         | 0         | 0 | 0         | 0 | 2 | 5794512 | 5823951 |
| si:ch73-344o19.1   | 0         | 0.2016206 | 0.6250358 | 0 | 0         | 0 | 2 | 5823773 | 5839652 |
| rec8a              | 0         | 0         | 0         | 0 | 0         | 0 | 2 | 5854588 | 5874907 |
| gng5               | 151.18493 | 160.65882 | 133.96967 | 0 | 0         | 0 | 2 | 5885534 | 5891553 |
| zp3b               | 1.0062617 | 1.6403546 | 1.0896851 | 0 | 1.3671469 | 0 | 2 | 5895636 | 5901186 |
| arl14              | 0         | 1.2673294 | 0.6547994 | 0 | 0         | 0 | 2 | 5903803 | 5904831 |
| ppm11a             | 8.2685067 | 8.0231445 | 8.9540015 | 0 | 0         | 0 | 2 | 5908158 | 5934900 |
| otol1a             | 0         | 0         | 0         | 0 | 0         | 0 | 2 | 5946029 | 5958557 |
| SMC6               | 3.4996305 | 3.8711907 | 5.5267404 | 0 | 0         | 0 | 2 | 5964013 | 6016219 |
| 5S_rRNA (2 601009  | 0         | 0         | 0         | 0 | 0         | 0 | 2 | 6010092 | 6010206 |
| rgs13              | 0         | 0         | 0         | 0 | 0         | 0 | 2 | 6179990 | 6186663 |
| rgs1               | 0         | 0         | 0         | 0 | 0         | 0 | 2 | 6216200 | 6223208 |
| rgs18              | 0         | 0         | 0         | 0 | 0         | 0 | 2 | 6240288 | 6253261 |
| FAM5C (2 of 3)     | 0.2022774 | 0         | 0         | 0 | 0         | 0 | 2 | 6439225 | 6509894 |
| 5S_rRNA (2 64708   | 0         | 0         | 0         | 0 | 0         | 0 | 2 | 6470817 | 6470931 |
| si:zfos-986b4.1    | 0         | 0         | 0         | 0 | 0         | 0 | 2 | 6580575 | 6624140 |
| rgs5b              | 0         | 0         | 0         | 0 | 0         | 0 | 2 | 6590676 | 6593943 |
| nos1apb            | 0         | 0.2009681 | 0         | 0 | 0         | 0 | 2 | 6630924 | 6657578 |
| si:ch211-170d12.2  | 0         | 0         | 0         | 0 | 0         | 0 | 2 | 6663337 | 6663958 |
| ddr2b              | 0         | 0         | 0         | 0 | 0         | 0 | 2 | 6668120 | 6701310 |
| XPR1 (1 of 2)      | 8.7595091 | 13.636581 | 10.048789 | 0 | 0         | 0 | 2 | 6704193 | 6762154 |
| cdc14aa            | 1.0928662 | 1.3573582 | 0.7889796 | 0 | 0         | 0 | 2 | 6780044 | 6810356 |
| si:dkey-60b12.6    | 0         | 0         | 0         | 0 | 0         | 0 | 2 | 6785126 | 6785749 |
| VCAM1 (2 of 2)     | 0         | 0         | 0         | 0 | 0         | 0 | 2 | 6811661 | 6818735 |
| extl2              | 2.4971443 | 2.6168868 | 2.7041683 | 0 | 0         | 0 | 2 | 6828061 | 6836515 |
| zgc:110366         | 5.8186265 | 5.6911305 | 2.1003386 | 0 | 0         | 0 | 2 | 6837105 | 6853273 |
| si:dkey-60b12.9    | 3.7297205 | 2.6568038 | 2.8510096 | 0 | 0         | 0 | 2 | 6854412 | 6856538 |
| RC3H1 (1 of 2)     | 3.4898161 | 3.5555711 | 6.7709536 | 0 | 0         | 0 | 2 | 6859433 | 6894418 |
| si:ch211-13f8.1    | 0         | 0         | 0.1654281 | 0 | 0         | 0 | 2 | 6897790 | 6914529 |
| COLGALT2 (2 of 2)  | 1.0387398 | 0.2418998 | 0.7499039 | 0 | 0         | 0 | 2 | 6918043 | 6939984 |
| zgc:153115         | 12.403483 | 14.898581 | 17.437756 | 0 | 0         | 0 | 2 | 6943373 | 6951681 |
| si:dkeyp-106c3.3   | 0         | 0         | 0         | 0 | 0         | 0 | 2 | 6984470 | 6991133 |

|                    |           |           |           |           |           |           |   |         |         |
|--------------------|-----------|-----------|-----------|-----------|-----------|-----------|---|---------|---------|
| si:dkeyp-106c3.2   | 0         | 0.8616332 | 2.0033358 | 1.5901112 | 0.8378122 | 0         | 2 | 6992921 | 6994227 |
| si:dkeyp-106c3.1   | 0         | 0.197738  | 0         | 0         | 0         | 0         | 2 | 7000339 | 7117405 |
| 5S_rRNA (2 70996)  | 0         | 0         | 0         | 0         | 0         | 0         | 2 | 7099614 | 7099732 |
| CABZ01088691.2     | 0         | 0         | 0         | 0         | 0         | 0         | 2 | 7151503 | 7153771 |
| CABZ01088691.1     | 0         | 0         | 0         | 0         | 0         | 0         | 2 | 7155344 | 7158267 |
| ripk2              | 1.2510827 | 0.3329713 | 1.2902884 | 0         | 0         | 0         | 2 | 7264635 | 7298101 |
| CCDC39             | 0.3281673 | 1.3756138 | 1.421495  | 0         | 0         | 0         | 2 | 7362320 | 7480705 |
| dcun1d1            | 10.912521 | 8.8276314 | 9.9513395 | 0         | 0         | 0         | 2 | 7482658 | 7495864 |
| eif4a2             | 17.875086 | 17.536554 | 21.141696 | 0         | 0         | 0         | 2 | 7500004 | 7511589 |
| SNORD2 (2 750489)  | 0         | 0         | 0         | 0         | 0         | 0         | 2 | 7504900 | 7504970 |
| SNORD2 (2 750527)  | 0         | 0         | 0         | 0         | 0         | 0         | 2 | 7505280 | 7505350 |
| SNORA81 (2 750555) | 0         | 0         | 0         | 0         | 0         | 0         | 2 | 7505553 | 7505731 |
| SNORA81 (2 750777) | 0         | 0         | 0         | 0         | 0         | 0         | 2 | 7507735 | 7507924 |
| SNORD2 (2 750821)  | 0         | 0         | 0         | 0         | 0         | 0         | 2 | 7508211 | 7508282 |
| b3gnt5b            | 5.6720357 | 4.082761  | 1.8612945 | 0         | 0         | 0.3614541 | 2 | 7533735 | 7541614 |
| tbl1xr1b           | 1.8659934 | 3.476393  | 4.4904273 | 0         | 0         | 0         | 2 | 7549012 | 7585043 |
| kcnmb2             | 0         | 0         | 0         | 0         | 0         | 0         | 2 | 7602709 | 7613741 |
| KCNMB3             | 0         | 0         | 0         | 0         | 0         | 0         | 2 | 7616255 | 7629451 |
| si:ch211-38m6.6    | 0         | 0         | 0         | 0         | 0         | 0         | 2 | 7631821 | 7658416 |
| ephb3a             | 9.948859  | 7.511543  | 8.0140926 | 0         | 0         | 0         | 2 | 7708305 | 7801920 |
| pcolce2a           | 0.5622336 | 1.3093192 | 1.2176903 | 0         | 0         | 0         | 2 | 7815722 | 7831598 |
| pls1               | 0         | 0.2670931 | 1.6560089 | 0         | 0         | 0         | 2 | 7845116 | 7895670 |
| chst2a             | 14.607608 | 12.136126 | 11.400823 | 0         | 0         | 0         | 2 | 7896790 | 7899153 |
| 5S_rRNA (2 797362) | 0         | 0         | 0         | 0         | 0         | 0         | 2 | 7973626 | 7973741 |
| C2H3orf58 (2 of 2) | 2.5794936 | 4.1503444 | 4.7402214 | 0         | 0         | 0         | 2 | 8045450 | 8096540 |
| si:ch211-222m2.2   | 1.4447488 | 1.0093513 | 0.5215082 | 1.6557505 | 1.635744  | 0         | 2 | 8268735 | 8272479 |
| si:ch211-222m2.1   | 0         | 0         | 0.2656895 | 0.2108862 | 0.5000113 | 0         | 2 | 8274929 | 8279057 |
| si:ch211-71m22.1   | 2.0164055 | 0.8049888 | 1.2477567 | 0         | 0         | 0         | 2 | 8371294 | 8396016 |
| si:ch211-71m22.5   | 0         | 0         | 0         | 0         | 0         | 0         | 2 | 8402160 | 8416146 |
| si:ch211-71m22.2   | 0         | 0         | 0         | 0         | 0         | 0         | 2 | 8418581 | 8419473 |
| si:ch211-71m22.3   | 0         | 0         | 0         | 0         | 0         | 0         | 2 | 8428763 | 8432781 |
| tubp1              | 99.016087 | 86.636676 | 94.622399 | 0         | 0         | 0.2674701 | 2 | 8433634 | 8447445 |
| SCARNA24           | 0         | 0         | 0         | 0         | 0         | 0         | 2 | 8441729 | 8441863 |
| fam73a             | 13.59714  | 14.185817 | 14.135425 | 0         | 0         | 0         | 2 | 8447449 | 8473100 |
| usp33              | 4.4192968 | 6.7868779 | 7.0707277 | 0         | 0         | 0         | 2 | 8501496 | 8561837 |
| zzz3               | 11.126238 | 11.974209 | 12.477567 | 0         | 0         | 0         | 2 | 8563505 | 8625237 |
| ak5                | 0         | 0         | 0.2633015 | 0         | 0         | 0         | 2 | 8630181 | 8844296 |
| CR450828.1         | 0         | 0         | 0         | 0         | 0         | 0         | 2 | 8680562 | 8680640 |
| pigk               | 2.204168  | 3.5197892 | 4.5464819 | 0         | 0         | 0         | 2 | 8846226 | 8922838 |
| st6galnac5a        | 0         | 0.4390848 | 0.6805946 | 0         | 0         | 0         | 2 | 8945288 | 9044160 |
| st6galnac3         | 0.5467532 | 1.5279226 | 4.3419301 | 0         | 0         | 0         | 2 | 9114487 | 9273952 |
| 5S_rRNA (2 919089) | 0         | 0         | 0         | 0         | 0         | 0         | 2 | 9190899 | 9191016 |
| cope               | 93.83458  | 89.754625 | 85.473859 | 0.7217374 | 0.5704133 | 0         | 2 | 9297672 | 9309055 |
| wu:fi34b01         | 0         | 0         | 0.5223168 | 0         | 0         | 0.5071565 | 2 | 9313963 | 9315252 |
| zgc:153615         | 1.0278719 | 0.7181068 | 1.1130869 | 0         | 0         | 0         | 2 | 9315715 | 9334070 |
| CABZ01069745.1     | 0         | 0         | 0         | 0         | 0         | 0         | 2 | 9338010 | 9342344 |
| txndc12            | 19.632686 | 25.321979 | 23.986002 | 0         | 0         | 0         | 2 | 9361512 | 9368564 |
| gipc2              | 9.5763685 | 9.1616033 | 7.1003792 | 0         | 0         | 0         | 2 | 9371736 | 9415099 |
| dnajb4             | 1.2014775 | 0.4476766 | 0.346956  | 0         | 0         | 0         | 2 | 9415509 | 9424697 |
| zgc:136678         | 0         | 0         | 0         | 0         | 0         | 0         | 2 | 9432998 | 9448262 |
| selt1a             | 33.694727 | 30.712074 | 25.633262 | 0         | 0         | 0         | 2 | 9473203 | 9485168 |
| dvl3a              | 22.177302 | 22.825406 | 23.064216 | 0         | 0         | 0         | 2 | 9490950 | 9532978 |
| si:ch1073-170o4.1  | 0         | 0         | 0.9306473 | 0         | 1.1676139 | 0         | 2 | 9535335 | 9536958 |
| SNORA13 (2 95357)  | 0         | 0         | 0         | 0         | 0         | 0         | 2 | 9535755 | 9535890 |
| SNORA13 (2 95361)  | 0         | 0         | 0         | 0         | 0         | 0         | 2 | 9536199 | 9536328 |
| pcytl1a            | 1.4151116 | 2.0160619 | 2.4038124 | 0         | 0         | 0.2334042 | 2 | 9544319 | 9572728 |
| ap2mla             | 107.01384 | 96.070221 | 90.231648 | 120.53646 | 119.68119 | 120.82532 | 2 | 9578708 | 9607608 |
| anxa13l            | 0.6481303 | 0.8049888 | 0.9358175 | 1.2379801 | 0.9784172 | 0         | 2 | 9610654 | 9631137 |
| abilb              | 1.1249754 | 1.7028843 | 1.5228008 | 1.1281157 | 1.0826422 | 0.8871609 | 2 | 9651729 | 9704711 |
| 5S_rRNA (2 966442) | 0         | 0         | 0         | 0         | 0         | 0         | 2 | 9664426 | 9664542 |
| acbd5b             | 0         | 0         | 0         | 0         | 0         | 0         | 2 | 9707575 | 9730294 |
| tSEN15             | 2.0835762 | 1.6904418 | 1.6497777 | 1.6175941 | 1.6437071 | 3.2037858 | 2 | 9735018 | 9746702 |
| C2H1orf21          | 25.925214 | 26.936165 | 22.315648 | 17.426951 | 21.449916 | 17.474143 | 2 | 9746978 | 9760625 |
| sec22ba            | 19.695576 | 17.857434 | 16.304395 | 18.05765  | 19.504475 | 20.617325 | 2 | 9759839 | 9772558 |
| imp3               | 52.191549 | 34.794583 | 56.887854 | 41.635226 | 44.028775 | 52.367246 | 2 | 9771984 | 9778860 |

|                     |           |           |           |           |           |           |   |          |          |
|---------------------|-----------|-----------|-----------|-----------|-----------|-----------|---|----------|----------|
| SLC35A3 (2 of 2)    | 3.2263937 | 3.8250884 | 4.2350007 | 4.3698908 | 7.9700109 | 2.4672479 | 2 | 9779386  | 9829157  |
| FPI02157.1          | 0         | 0.5066363 | 0.7853014 | 0         | 0         | 0         | 2 | 9845472  | 9850467  |
| cmpk                | 56.090983 | 59.79062  | 68.46427  | 60.638014 | 59.44703  | 79.853584 | 2 | 9852644  | 9865826  |
| bcl6ab              | 6.8069443 | 4.579434  | 7.3712693 | 7.1509904 | 5.4804051 | 5.3017172 | 2 | 9876231  | 9887088  |
| insl5b              | 0         | 0         | 0         | 0         | 0         | 0         | 2 | 9916659  | 9917958  |
| AHSG                | 0         | 0         | 0         | 0         | 0         | 0         | 2 | 9923242  | 9930638  |
| pfn2l               | 159.68389 | 126.88198 | 154.66349 | 108.17394 | 111.5458  | 107.99577 | 2 | 9935926  | 9940736  |
| nsun4               | 6.6951772 | 5.301146  | 6.283538  | 5.371093  | 5.7610105 | 1.8772795 | 2 | 9949381  | 9958330  |
| dmxb1a              | 5.2970594 | 2.8650646 | 5.9212474 | 4.1123967 | 4.3335536 | 5.9889409 | 2 | 9974227  | 9981384  |
| 5S_rRNA (2 99950)   | 0         | 0         | 0         | 0         | 0         | 0         | 2 | 9995091  | 9995208  |
| gadd45aa            | 2.6070047 | 0.6938451 | 2.1509613 | 45.669906 | 48.575721 | 49.602578 | 2 | 10071950 | 10075877 |
| gngl2a              | 13.391331 | 7.399946  | 7.2098003 | 7.80361   | 7.8121095 | 7.3187421 | 2 | 10078443 | 10130118 |
| wls                 | 70.772148 | 87.213482 | 85.687177 | 68.012632 | 66.773498 | 58.395106 | 2 | 10133495 | 10178043 |
| si:ch211-132a5.4    | 0         | 0.6201055 | 1.9223641 | 0.7629207 | 0         | 0         | 2 | 10177784 | 10207577 |
| scinlb              | 5.2893124 | 4.6091865 | 4.6807984 | 3.5197562 | 3.2454117 | 1.4352437 | 2 | 10187884 | 10242089 |
| CCDC18 (2 of 2)     | 1.7613489 | 1.3511802 | 2.6927609 | 2.4935514 | 2.1584266 | 2.1788363 | 2 | 10259668 | 10355322 |
| CCDC18 (1 of 2)     | 0.4771512 | 1.3334171 | 0         | 0         | 0         | 0         | 2 | 10259795 | 10272567 |
| mtf2                | 10.152675 | 7.7378278 | 13.593046 | 8.2505889 | 9.6974771 | 10.351771 | 2 | 10398979 | 10423736 |
| fam69a              | 0.4502932 | 0.1398179 | 0         | 0.6880764 | 0.4078574 | 0         | 2 | 10433352 | 10478531 |
| rpl5a               | 2201.2228 | 2122.4278 | 1832.0046 | 1378.9692 | 1511.3015 | 1392.8402 | 2 | 10478581 | 10494926 |
| EVI5 (2 of 2)       | 0         | 0         | 0         | 0         | 0         | 0         | 2 | 10501363 | 10526503 |
| gf11aa              | 8.606321  | 9.5015075 | 6.9035718 | 8.4020289 | 4.6194125 | 4.4687971 | 2 | 10558049 | 10576954 |
| rpap2               | 6.2022043 | 8.3195018 | 7.5223609 | 5.6864158 | 4.4941653 | 3.8259175 | 2 | 10582838 | 10612358 |
| glimna              | 9.9697412 | 9.7757264 | 8.839056  | 9.6217224 | 8.3964921 | 11.525075 | 2 | 10612459 | 10649203 |
| cdc7                | 13.444488 | 8.2818089 | 12.523952 | 8.9465923 | 6.2851486 | 3.0401111 | 2 | 10655336 | 10669070 |
| iceanc2             | 11.608305 | 5.6229071 | 12.738292 | 7.9822001 | 4.2057338 | 8.4627012 | 2 | 10669711 | 10671898 |
| cdep2               | 0.5529074 | 0.2575201 | 0.7983277 | 0         | 0.5008012 | 0.3875781 | 2 | 10672547 | 10698051 |
| mrlp37              | 44.310425 | 37.234742 | 41.161057 | 39.773193 | 39.853935 | 45.613778 | 2 | 10705328 | 10723075 |
| ssbp3a              | 5.8955297 | 5.280539  | 7.5301934 | 10.134834 | 12.733687 | 13.033774 | 2 | 10726557 | 10818715 |
| 5S_rRNA (2 10797)   | 0         | 0         | 0         | 0         | 0         | 0         | 2 | 10797962 | 10798095 |
| acot11a             | 1.1503382 | 0.5357773 | 0.8304708 | 0.659171  | 0.6077925 | 0.4031832 | 2 | 10820443 | 10857700 |
| fam151a             | 0         | 0         | 0         | 0.4753844 | 0.3757122 | 0         | 2 | 10860360 | 10874219 |
| cryz                | 5.2828738 | 8.4751654 | 5.5089635 | 9.7543489 | 8.7725258 | 11.109598 | 2 | 10895509 | 10910704 |
| tyw3                | 10.035567 | 10.224657 | 11.320373 | 3.5941358 | 1.9883963 | 8.3537675 | 2 | 10910620 | 10917526 |
| lhx8a               | 0         | 0         | 0         | 0         | 0         | 0         | 2 | 10997100 | 11001473 |
| slc44a5a            | 0         | 0         | 0         | 0         | 0         | 0         | 2 | 11008119 | 11259816 |
| 5S_rRNA (2 11035)   | 0         | 0         | 0         | 0         | 0         | 0         | 2 | 11035191 | 11035312 |
| si:dkey-189n19.4    | 0         | 0         | 2.5047904 | 0         | 6.2851486 | 4.8641777 | 2 | 11122029 | 11122621 |
| si:dkey-189n19.3    | 0         | 0         | 0         | 0         | 0         | 0         | 2 | 11128345 | 11129288 |
| sdr16c5a            | 32.148017 | 40.033455 | 40.065748 | 50.416942 | 51.187043 | 55.982135 | 2 | 11274377 | 11295652 |
| penka               | 0         | 0         | 0         | 0         | 0         | 0         | 2 | 11299996 | 11304124 |
| mpad1               | 21.856658 | 26.705651 | 35.656697 | 38.061111 | 46.792625 | 42.580787 | 2 | 11424558 | 11440036 |
| MFF (1 of 2)        | 1.647983  | 1.2792642 | 0.793159  | 0.6295555 | 0.7463383 | 0.3850688 | 2 | 11442481 | 11454228 |
| itr01               | 0.2711527 | 0         | 0         | 0         | 0         | 0         | 2 | 11461586 | 11468724 |
| greb1l (2 11548228) | 5.1671014 | 11.732225 | 13.056112 | 9.9929411 | 14.040456 | 18.110226 | 2 | 11548229 | 11568413 |
| si:dkey-203o21.2    | 0         | 0         | 0         | 0         | 0         | 0         | 2 | 11552131 | 11558509 |
| greb1l (2 11555477) | 20.305225 | 20.669535 | 23.499861 | 27.409104 | 21.946742 | 19.075955 | 2 | 11555478 | 11624584 |
| abhd3               | 0         | 0         | 0         | 0         | 0         | 0         | 2 | 11646751 | 11703651 |
| trove2              | 3.1027517 | 3.4683029 | 3.1359842 | 3.3781053 | 2.66983   | 1.3049838 | 2 | 11714916 | 11737238 |
| cdc73               | 19.802173 | 22.329338 | 24.077315 | 37.624642 | 25.252014 | 28.8578   | 2 | 11737859 | 11789602 |
| CTS73433.2          | 0         | 0         | 0         | 0         | 0         | 0         | 2 | 11768536 | 11769702 |
| KCNT2 (2 of 2)      | 0         | 0         | 0.2501071 | 0         | 0         | 0         | 2 | 11810785 | 11853432 |
| KCNT2 (1 of 2)      | 0         | 0         | 0         | 0         | 0         | 0         | 2 | 11862531 | 11868932 |
| GPR158 (1 of 2)     | 0         | 0.1125859 | 0.1745114 | 0.554061  | 0.437893  | 0.6777849 | 2 | 11899842 | 12034000 |
| 5S_rRNA (2 12015)   | 0         | 0         | 0         | 0         | 0         | 0         | 2 | 12015728 | 12015844 |
| prtfcd1             | 54.300677 | 40.200357 | 40.057555 | 32.610208 | 35.867344 | 28.921837 | 2 | 12062931 | 12087538 |
| arhgap21b           | 16.261982 | 17.814333 | 20.474759 | 17.295138 | 17.145078 | 17.691802 | 2 | 12099800 | 12198630 |
| dpp6b               | 0.7194047 | 0.1116891 | 0.1731214 | 0.137412  | 0.2172026 | 0         | 2 | 12198703 | 12424750 |
| kmt2cb              | 3.8892322 | 4.0002512 | 5.9665272 | 8.2335206 | 6.3849114 | 4.3923429 | 2 | 12639649 | 12829533 |
| prkag2              | 0         | 0         | 0         | 0         | 0         | 0         | 2 | 12848791 | 12941196 |
| 5S_rRNA (2 12915)   | 0         | 0         | 0         | 0         | 0         | 0         | 2 | 12915555 | 12915671 |
| BCL2 (2 of 2)       | 0         | 0         | 0         | 0         | 0         | 0         | 2 | 12979720 | 13007658 |
| kdsr                | 7.7288238 | 6.2265922 | 6.63534   | 6.4636526 | 8.5140693 | 5.5641925 | 2 | 13016280 | 13046785 |
| vps4b               | 30.922845 | 23.895075 | 27.905402 | 32.015955 | 34.055992 | 32.760859 | 2 | 13047975 | 13060553 |
| si:dkey-185p13.1    | 0         | 0         | 0         | 0         | 1.3569061 | 0         | 2 | 13090040 | 13125921 |



|                     |           |           |           |           |           |           |   |          |          |
|---------------------|-----------|-----------|-----------|-----------|-----------|-----------|---|----------|----------|
| NMUR1 (2 of 2)      | 0         | 0         | 0         | 0         | 0         | 0         | 2 | 13168221 | 13174684 |
| wdr65               | 1.4336524 | 0.8012792 | 0.8280044 | 0         | 0.3895634 | 0         | 2 | 13254294 | 13461565 |
| 5S_rRNA (2 133540)  | 0         | 0         | 0         | 0         | 0         | 0         | 2 | 13354085 | 13354199 |
| LEPROT              | 4.320869  | 4.0249442 | 14.557161 | 8.2532007 | 5.2182252 | 16.153874 | 2 | 13523455 | 13524358 |
| ebna1bp2            | 165.0095  | 172.00706 | 177.74405 | 183.60554 | 141.55107 | 160.34496 | 2 | 13526922 | 13550157 |
| ZBTB41              | 2.9387805 | 2.1671964 | 1.944811  | 2.6663187 | 2.1072812 | 2.5750403 | 2 | 13575574 | 13634443 |
| zgc:66475           | 14.634567 | 17.150293 | 12.269292 | 12.714187 | 13.041604 | 5.2947448 | 2 | 13740482 | 13773947 |
| pde4bb              | 0         | 0         | 0         | 0         | 0.1942446 | 0         | 2 | 13915648 | 14057782 |
| si:dkey-228i19.34   | 0         | 0         | 0         | 0         | 0         | 0         | 2 | 13960500 | 13962401 |
| si:dkey-228i19.32   | 2.5044035 | 1.5552557 | 4.8213854 | 1.9134433 | 1.5122585 | 4.6814447 | 2 | 13984724 | 13986152 |
| tctex1d1            | 3.4312783 | 4.7944188 | 2.477164  | 1.9662037 | 0.5179856 | 0.8017548 | 2 | 14241524 | 14305449 |
| SGIP1               | 0.7268752 | 0.2256978 | 0.6996766 | 0.8330333 | 0.6583742 | 0.3396843 | 2 | 14312207 | 14432336 |
| BX510915.1          | 0         | 0         | 0         | 0         | 0         | 0         | 2 | 14318806 | 14321829 |
| BX510915.3          | 0         | 0         | 0         | 0         | 0         | 0         | 2 | 14478533 | 14480583 |
| U2 (2 14480938..14) | 0         | 0         | 0         | 0         | 0         | 0         | 2 | 14480939 | 14481129 |
| U2 (2 14485750..14) | 0         | 0         | 0         | 0         | 0         | 0         | 2 | 14485751 | 14485936 |
| U2 (2 14491579..14) | 0         | 0         | 0         | 0         | 0         | 0         | 2 | 14491580 | 14491756 |
| U2 (2 14496377..14) | 0         | 0         | 0         | 0         | 0         | 0         | 2 | 14496378 | 14496568 |
| U2 (2 14501190..14) | 0         | 0         | 0         | 0         | 0         | 0         | 2 | 14501191 | 14501376 |
| U2 (2 14529046..14) | 0         | 0         | 0         | 0         | 0         | 0         | 2 | 14529047 | 14529234 |
| U2 (2 14533976..14) | 0         | 0         | 0         | 0         | 0         | 0         | 2 | 14533977 | 14534121 |
| U2 (2 14545542..14) | 0         | 0         | 0         | 0         | 0         | 0         | 2 | 14545543 | 14545729 |
| U2 (2 14588059..14) | 0         | 0         | 0         | 0         | 0         | 0         | 2 | 14588060 | 14588209 |
| ZCCHC3              | 0         | 0         | 0         | 0         | 0         | 0         | 2 | 14588404 | 14588922 |
| si:dkey-48k17.29    | 0         | 0         | 0         | 0         | 0         | 0         | 2 | 14599687 | 14600658 |
| si:ch73-366i20.25   | 0         | 1.6219924 | 0         | 0         | 0         | 0         | 2 | 14609366 | 14609830 |
| si:ch73-366i20.1 (2 | 0         | 0         | 0         | 0         | 0         | 0         | 2 | 14611738 | 14618878 |
| si:dkey-10f21.16    | 0         | 0         | 0         | 0         | 0         | 0         | 2 | 14790590 | 14791602 |
| hccsal              | 0         | 0         | 0         | 0         | 0         | 0         | 2 | 14802966 | 14807865 |
| si:dkey-10f21.3     | 0         | 0         | 0.4871935 | 0         | 0         | 0         | 2 | 14813462 | 14815633 |
| hccsa               | 8.1732534 | 7.9760361 | 11.801135 | 6.6906681 | 9.8706712 | 12.004255 | 2 | 14819195 | 14853746 |
| si:dkey-10f21.4     | 0         | 0.1980383 | 0         | 0         | 0.1925632 | 0.2980555 | 2 | 14855673 | 14862429 |
| cnn3b               | 47.234732 | 44.785461 | 41.712173 | 33.108276 | 33.997456 | 28.97186  | 2 | 14868993 | 14895878 |
| T3b                 | 2.4143215 | 2.5702526 | 0.995992  | 0.3952752 | 0         | 1.4506251 | 2 | 14921325 | 14927551 |
| si:dkey-61d19.4     | 0         | 0         | 0         | 0         | 0         | 0         | 2 | 14922686 | 14928299 |
| abcd3b              | 4.2973565 | 7.0963017 | 9.5892896 | 6.2681487 | 7.0770405 | 6.5724427 | 2 | 14930111 | 14946095 |
| arhgap29b           | 3.8809961 | 4.0168856 | 6.1225209 | 5.1891062 | 4.3615137 | 4.8364594 | 2 | 14949001 | 15018503 |
| 5S_rRNA (2 149938)  | 0         | 0         | 0         | 0         | 0         | 0         | 2 | 14993850 | 14993966 |
| abca4b              | 0         | 0         | 0.1824749 | 0         | 0         | 0         | 2 | 15030259 | 15115218 |
| tecl2               | 0         | 0         | 0         | 0         | 0         | 0         | 2 | 15120671 | 15145420 |
| olfm3b              | 0         | 0         | 0         | 0         | 0         | 0         | 2 | 15164217 | 15169961 |
| coll1a1b            | 3.0754591 | 2.6309655 | 4.4405705 | 2.0140696 | 2.046583  | 1.2319094 | 2 | 15210524 | 15383469 |
| amy2a               | 2.3130302 | 0.8079814 | 0.4174651 | 0         | 0         | 0.4053481 | 2 | 15433338 | 15447555 |
| vav3b (2 15610726.  | 0         | 0         | 0         | 0         | 0         | 0         | 2 | 15610727 | 15720770 |
| si:dkey-94a14.1     | 0         | 0.770734  | 0         | 0         | 0         | 0         | 2 | 15654136 | 15664619 |
| 5S_rRNA (2 156890)  | 0         | 0         | 0         | 0         | 0         | 0         | 2 | 15689008 | 15689123 |
| 5S_rRNA (2 157063)  | 0         | 0         | 0         | 0         | 0         | 0         | 2 | 15706358 | 15706472 |
| vav3b (2 15813971.  | 0         | 0.1254166 | 0.388799  | 0         | 0         | 0         | 2 | 15813972 | 15979786 |
| selj                | 9.3437556 | 7.211742  | 3.4691633 | 2.4476311 | 1.6926394 | 2.2456473 | 2 | 15981489 | 15992851 |
| sh3glb1             | 4.6585066 | 7.7810969 | 8.3498761 | 8.468551  | 8.729974  | 7.6571031 | 2 | 15994629 | 16031206 |
| arhgef4             | 1.6997326 | 0.9715842 | 1.8406477 | 0.6198099 | 0.279918  | 0.1083165 | 2 | 16019126 | 16179625 |
| si:dkey-231j24.3    | 0         | 0         | 0         | 0         | 0         | 3.3266029 | 2 | 16186657 | 16197001 |
| atr                 | 3.0915196 | 2.8797897 | 3.5869499 | 1.5184405 | 2.2001366 | 1.4705319 | 2 | 16204868 | 16270087 |
| GEN1                | 10.591181 | 11.36064  | 14.82891  | 11.402359 | 9.8837636 | 8.0991569 | 2 | 16270210 | 16279055 |
| agfg1b              | 4.8827757 | 7.6347595 | 5.0357893 | 5.9955987 | 5.5282767 | 6.8454758 | 2 | 16280904 | 16299874 |
| fbxo36b             | 1.9283217 | 0         | 2.0881878 | 0.552487  | 0         | 0         | 2 | 16302921 | 16305991 |
| CR377211.1          | 0         | 0         | 0.7665399 | 0         | 0         | 0         | 2 | 16308194 | 16309072 |
| si:dkeyp-13a3.6     | 0         | 0.574992  | 0.4456274 | 0         | 0         | 0         | 2 | 16324266 | 16327378 |
| si:dkeyp-13a3.7     | 0         | 0         | 0         | 0         | 0         | 0         | 2 | 16329407 | 16333005 |
| si:dkeyp-13a3.8     | 0         | 0         | 0         | 0         | 0         | 0         | 2 | 16333444 | 16339963 |
| si:dkeyp-13a3.9     | 0         | 0         | 0         | 0         | 0         | 0         | 2 | 16347781 | 16349263 |
| grk7a               | 0         | 0.1374309 | 0         | 0.1690823 | 0         | 0         | 2 | 16357036 | 16364710 |
| atp1b3a             | 45.750377 | 43.856825 | 55.008054 | 82.747385 | 68.562456 | 75.102557 | 2 | 16368289 | 16386273 |
| si:dkeyp-13a3.10    | 5.0084174 | 5.2739352 | 5.9738608 | 8.7346053 | 5.1281299 | 3.3581665 | 2 | 16406132 | 16416179 |
| xrml                | 5.6145303 | 8.3143687 | 10.497092 | 8.496863  | 8.7364826 | 6.6603895 | 2 | 16417594 | 16467843 |

|                      |           |           |           |           |           |           |   |          |          |
|----------------------|-----------|-----------|-----------|-----------|-----------|-----------|---|----------|----------|
| gk5                  | 9.0152512 | 7.8284768 | 7.5012485 | 8.5807344 | 8.4424528 | 8.3546313 | 2 | 16472899 | 16515517 |
| ppplr7               | 27.209541 | 26.870605 | 27.176042 | 26.259724 | 27.610153 | 22.945441 | 2 | 16517108 | 16528856 |
| zgc:158450           | 71.311328 | 82.514769 | 93.3018   | 105.47705 | 92.030664 | 90.291064 | 2 | 16534447 | 16574921 |
| SNORD66 (2 16543     | 0         | 0         | 0         | 0         | 0         | 0         | 2 | 16543809 | 16543884 |
| SNORD66 (2 16548     | 0         | 0         | 0         | 0         | 0         | 0         | 2 | 16548754 | 16548814 |
| ifa                  | 983.20151 | 1083.5453 | 893.58213 | 2024.1956 | 2017.8582 | 1751.7505 | 2 | 16581396 | 16592930 |
| ubxn7                | 16.144172 | 27.841549 | 18.900101 | 19.502093 | 25.688598 | 24.162842 | 2 | 16636583 | 16663153 |
| clcn2                | 0         | 0         | 0.1600828 | 0         | 0         | 0         | 2 | 16726157 | 16825889 |
| 5S_rRNA (2 167686    | 0         | 0         | 0         | 0         | 0         | 0         | 2 | 16768660 | 16768779 |
| fam131a              | 0         | 0         | 0         | 0         | 0         | 0         | 2 | 16837577 | 16863572 |
| thpo                 | 0         | 0         | 0         | 0         | 0         | 0         | 2 | 16876364 | 16893854 |
| pif1                 | 5.6786796 | 6.6899931 | 6.5111999 | 2.105541  | 3.0255994 | 2.8098722 | 2 | 16918145 | 16936147 |
| si:ch211-234e14.2    | 0         | 0         | 2.6527111 | 0         | 0         | 0         | 2 | 17003072 | 17007080 |
| artnb                | 0         | 0         | 0         | 0         | 0         | 0         | 2 | 17021615 | 17022236 |
| st3gal3b             | 1.5121641 | 2.8172001 | 2.9111627 | 2.4262164 | 1.3696573 | 1.5546664 | 2 | 17085994 | 17214190 |
| kdm4ab               | 4.9298655 | 6.0483057 | 6.4236482 | 6.201065  | 5.3365462 | 4.7200446 | 2 | 17271981 | 17313945 |
| si:dkey-183g16.1     | 0         | 0         | 0         | 0         | 0         | 0         | 2 | 17328080 | 17330598 |
| si:dkey-183g16.2     | 0         | 0         | 0.2502929 | 0         | 0         | 0         | 2 | 17341146 | 17347082 |
| ptprfb               | 17.303643 | 22.092576 | 25.508398 | 29.260823 | 24.879426 | 23.326043 | 2 | 17349918 | 17599781 |
| si:dkey-21k10.2      | 0.7253687 | 2.2523004 | 2.0946796 | 0.8313068 | 1.0950162 | 0.6779605 | 2 | 17382949 | 17385372 |
| 5S_rRNA (2 174294    | 0         | 0         | 0         | 0         | 0         | 0         | 2 | 17429460 | 17429578 |
| si:dkey-21k10.3      | 0         | 0         | 0         | 0         | 0         | 0         | 2 | 17478994 | 17486322 |
| dpydb                | 1.3871993 | 3.1012649 | 2.4035266 | 5.8822455 | 5.5284645 | 5.2509695 | 2 | 17988789 | 18244676 |
| ptbp2b               | 18.181319 | 20.410206 | 23.110299 | 19.590015 | 13.79363  | 14.596582 | 2 | 18274456 | 18292829 |
| 5S_rRNA (2 183758    | 0         | 0         | 0         | 0         | 0         | 0         | 2 | 18375814 | 18375928 |
| rwdd3                | 3.2227476 | 2.1014211 | 2.3266181 | 1.8467107 | 1.4595174 | 1.8072704 | 2 | 18420634 | 18429023 |
| si:dkey-1p9.2 (2 184 | 0         | 0         | 0         | 0         | 0         | 0         | 2 | 18434321 | 18436482 |
| BX088713.1           | 0         | 0         | 0         | 0         | 0         | 0         | 2 | 18434884 | 18434981 |
| si:dkey-236a14.10 (  | 0         | 0         | 0         | 0         | 0         | 0         | 2 | 18439678 | 18441841 |
| si:dkey-1p9.4        | 0         | 0.5645376 | 0         | 0         | 0         | 0         | 2 | 18448331 | 18468279 |
| si:dkey-1p9.5        | 0         | 0         | 0         | 0         | 0         | 0         | 2 | 18453186 | 18455022 |
| si:dkey-236a14.4     | 0         | 0         | 0         | 0         | 0         | 0         | 2 | 18489887 | 18491896 |
| BX664750.2           | 0         | 0         | 0         | 0         | 0         | 0         | 2 | 18490296 | 18490393 |
| si:dkey-236a14.5     | 0         | 0         | 0         | 0         | 0         | 0         | 2 | 18493335 | 18495479 |
| si:dkey-236a14.6     | 3.7407122 | 0.2903767 | 2.7005556 | 1.4290111 | 0.5646977 | 0.4370287 | 2 | 18506556 | 18510928 |
| si:dkey-236a14.7     | 0         | 0.4724934 | 0         | 0         | 0         | 0         | 2 | 18510804 | 18530295 |
| si:dkey-236a14.10 (  | 0         | 0         | 0         | 0         | 0         | 0         | 2 | 18545728 | 18547893 |
| BX664750.3           | 0         | 0         | 0         | 0         | 0         | 0         | 2 | 18546292 | 18546389 |
| si:dkey-1p9.2 (2 185 | 0         | 0         | 0         | 0         | 0         | 0         | 2 | 18549285 | 18551455 |
| BX664750.1           | 0         | 0         | 0         | 0         | 0         | 0         | 2 | 18550793 | 18550890 |
| si:dkey-236a14.12    | 0         | 0         | 0         | 0         | 0         | 0         | 2 | 18556679 | 18563664 |
| si:dkey-236a14.13    | 2.4641787 | 1.1477068 | 2.2237248 | 1.0590246 | 0.8369827 | 2.1591812 | 2 | 18561839 | 18564712 |
| mir137-1             | 0         | 0         | 0         | 0         | 0         | 0         | 2 | 18658781 | 18658865 |
| lppr5a               | 0         | 0.3008263 | 0         | 0         | 0         | 0         | 2 | 18777292 | 18837198 |
| lppr4a               | 0         | 0.3846849 | 0         | 0.3549607 | 0.2805373 | 0.4342247 | 2 | 18845341 | 18884569 |
| palmda               | 0.3761821 | 1.2264642 | 2.1726356 | 2.1556123 | 1.3629222 | 0.7910906 | 2 | 18919836 | 18933712 |
| frs1a (2 18957773.   | 0         | 0         | 0         | 0         | 0         | 0         | 2 | 18957774 | 18983437 |
| si:ch211-15316.3     | 0         | 0.3219955 | 0.4991027 | 0         | 0.3130935 | 0.4846162 | 2 | 18966911 | 18976220 |
| si:ch211-15316.4     | 0         | 2.420345  | 3.0012856 | 4.1688773 | 3.2948037 | 2.18563   | 2 | 18971244 | 18972306 |
| si:ch211-15316.1     | 0         | 0         | 6.5735474 | 0         | 2.0618353 | 3.1913751 | 2 | 18985447 | 18986613 |
| zfyve9a              | 5.2580715 | 5.1805348 | 5.839988  | 7.996037  | 6.5027114 | 4.961672  | 2 | 19131620 | 19171555 |
| cc2d1b               | 1.8937593 | 2.6460911 | 2.2786223 | 1.6277533 | 1.7152908 | 1.3274912 | 2 | 19180207 | 19205166 |
| cdc20                | 53.380286 | 51.697603 | 60.558395 | 43.211856 | 39.332106 | 40.091378 | 2 | 19218016 | 19234798 |
| elov11a              | 8.4529733 | 7.4108721 | 6.1025074 | 7.9779474 | 9.0074852 | 8.3652454 | 2 | 19237376 | 19288419 |
| si:dkey-225f23.4     | 0         | 0.5269018 | 0         | 0         | 0         | 0         | 2 | 19270815 | 19299800 |
| KNCN                 | 0         | 0         | 0         | 1.4338    | 0         | 0         | 2 | 19323999 | 1932537  |
| glua                 | 193.86722 | 185.18443 | 163.49283 | 124.85393 | 122.95683 | 145.21783 | 2 | 19460034 | 19463977 |
| PBX1A                | 0         | 0         | 0         | 0         | 0         | 0         | 2 | 19615653 | 19618709 |
| pbx1a                | 1.7445004 | 0         | 0.629709  | 0.49982   | 0.7900491 | 0         | 2 | 19717559 | 19749261 |
| 5S_rRNA (2 198817    | 0         | 0         | 0         | 0         | 0         | 0         | 2 | 19881796 | 19881912 |
| 5S_rRNA (2 199502    | 0         | 0         | 0         | 0         | 0         | 0         | 2 | 19950258 | 19950374 |
| frs1a (2 20213892.   | 0         | 0         | 0         | 0         | 0         | 0         | 2 | 20213893 | 20239553 |
| agla                 | 3.7372711 | 4.1399426 | 6.2711927 | 3.0097386 | 3.7510229 | 3.3986073 | 2 | 20242651 | 20295817 |
| 5S_rRNA (2 202556    | 0         | 0         | 0         | 0         | 0         | 0         | 2 | 20255652 | 20255766 |
| si:ch211-267e7.2     | 0         | 0         | 0         | 0         | 0         | 0         | 2 | 20308866 | 20325163 |

|                     |           |           |           |           |           |           |   |          |          |
|---------------------|-----------|-----------|-----------|-----------|-----------|-----------|---|----------|----------|
| si:ch211-267e7.3    | 22.338279 | 22.016619 | 16.647032 | 23.453567 | 23.496517 | 17.174092 | 2 | 20325257 | 20368685 |
| olfm12bb            | 1.7492231 | 0.1810471 | 1.9643983 | 1.113718  | 1.2322923 | 2.4523478 | 2 | 20374342 | 20384758 |
| si:ch211-267e7.11   | 0         | 0         | 0         | 0         | 0         | 0         | 2 | 20401639 | 20402945 |
| dusp12              | 5.5283034 | 3.9379941 | 5.1649301 | 1.4907523 | 2.3563832 | 1.8236429 | 2 | 20430282 | 20436382 |
| si:ch211-267e7.22   | 0         | 0.9460152 | 0         | 0.5819449 | 0.4599306 | 0         | 2 | 20468899 | 20473941 |
| rxrga (2 20495130.. | 7.374911  | 4.5009185 | 5.8749961 | 0.8743445 | 2.9944366 | 2.4957075 | 2 | 20495131 | 20546256 |
| rxrga (2 20495130.. | 0         | 0         | 0         | 0         | 0         | 0         | 2 | 20495131 | 20495229 |
| 5S_rRNA (2 20527    | 0         | 0         | 0         | 0         | 0         | 0         | 2 | 20527154 | 20527271 |
| prg4a               | 1.4006619 | 0         | 1.6853142 | 0.5350749 | 0.4228877 | 0.6545592 | 2 | 20566497 | 20584574 |
| tpa                 | 14.810575 | 17.695175 | 16.270876 | 25.091438 | 26.319297 | 19.522573 | 2 | 20584192 | 20662758 |
| C2H1orf27           | 3.6479255 | 7.0575689 | 8.1032906 | 4.1806953 | 8.387442  | 9.4417111 | 2 | 20662898 | 20675820 |
| pdca                | 0         | 0         | 0         | 0         | 0         | 0         | 2 | 20678954 | 20686429 |
| ptgs2a              | 12.978995 | 10.258265 | 12.493341 | 18.029748 | 17.277537 | 13.509213 | 2 | 20712497 | 20719864 |
| cpla2               | 5.4031708 | 5.033122  | 4.1607942 | 4.128193  | 3.099517  | 4.7975323 | 2 | 20721899 | 20753362 |
| arpc5a              | 36.157857 | 28.36337  | 33.16932  | 36.45352  | 38.41392  | 42.878584 | 2 | 20763673 | 20771677 |
| lyrm4               | 26.414369 | 22.261955 | 20.885631 | 7.207647  | 15.380402 | 18.515997 | 2 | 20775956 | 20777907 |
| nr1b                | 0         | 0.5734749 | 0         | 0         | 0         | 0         | 2 | 20788259 | 20790126 |
| si:ch211-27919.7    | 3.8205578 | 4.575726  | 8.6686254 | 4.3785402 | 2.9661491 | 3.060734  | 2 | 20796355 | 20829158 |
| treblb              | 10.350152 | 11.24818  | 13.449869 | 14.155039 | 11.812185 | 9.9639044 | 2 | 20840352 | 20858154 |
| riok1               | 19.334507 | 20.678537 | 21.712881 | 9.3009984 | 10.810134 | 13.051173 | 2 | 20859660 | 20872570 |
| nebl                | 0         | 0         | 0         | 0         | 0         | 0         | 2 | 20873367 | 20878695 |
| pip4k2ab            | 0         | 0         | 0         | 0         | 0.2732232 | 0.4229036 | 2 | 20886317 | 20951844 |
| bmi1b               | 11.347206 | 10.570066 | 8.1919588 | 7.663328  | 4.955388  | 4.5452498 | 2 | 20960930 | 20966517 |
| dnajc1              | 36.260961 | 40.686588 | 39.564629 | 39.903952 | 51.318308 | 50.258874 | 2 | 20970998 | 20978561 |
| si:dkey-29d8.3      | 2.9083243 | 0.4925711 | 1.1452498 | 0         | 0.4789532 | 0.7413393 | 2 | 20981903 | 21039018 |
| si:dkey-29d8.2      | 0         | 0         | 0         | 0         | 0         | 0         | 2 | 21002878 | 21004102 |
| vipr1a              | 0.705448  | 0         | 0         | 0         | 0.3194832 | 0         | 2 | 21026266 | 21094983 |
| zbtb47a             | 0         | 0.2137138 | 0         | 0         | 0         | 0         | 2 | 21105860 | 21116657 |
| klhl40a             | 8.5951518 | 12.49794  | 12.712993 | 2.402549  | 3.0381042 | 1.7634283 | 2 | 21123259 | 21131131 |
| hhatla              | 2.4918409 | 3.5872803 | 3.2708185 | 2.076922  | 1.6414611 | 1.2703532 | 2 | 21133813 | 21148101 |
| ctdspb              | 31.830226 | 39.180699 | 33.648396 | 33.221897 | 34.236261 | 40.640471 | 2 | 21152242 | 21177506 |
| dre-mir-26a-2       | 0         | 0         | 0         | 0         | 0         | 0         | 2 | 21171567 | 21171694 |
| plcd1b              | 11.772163 | 9.3641558 | 8.2122762 | 6.5183442 | 6.2299219 | 5.1923167 | 2 | 21184002 | 21235078 |
| si:ch211-12e1.5     | 0.5379295 | 0.7516322 | 0         | 0         | 0         | 0         | 2 | 21228248 | 21231672 |
| afg3l2              | 10.167514 | 9.7977604 | 12.149457 | 15.067827 | 13.02008  | 15.729091 | 2 | 21249272 | 21265553 |
| inhbab              | 0         | 0         | 0         | 0         | 0         | 0         | 2 | 21283052 | 21300265 |
| si:ch211-12e1.3     | 0         | 1.0325272 | 0         | 0         | 0         | 0         | 2 | 21337905 | 21339602 |
| mplkip              | 19.060509 | 20.510208 | 18.505462 | 21.467621 | 14.585307 | 20.271974 | 2 | 21402070 | 21404307 |
| ralab               | 7.4626509 | 5.7683106 | 8.25328   | 5.0951369 | 5.8964702 | 4.8972786 | 2 | 21404875 | 21415152 |
| C2H7orf25           | 1.0492498 | 0.4886947 | 1.8937285 | 1.2024899 | 0.9503682 | 0.3677526 | 2 | 21416700 | 21422016 |
| FBXL7               | 0         | 0.9166891 | 0.5683582 | 0         | 0.1782692 | 0.2759308 | 2 | 21430651 | 21531256 |
| 5S_rRNA (2 214518   | 0         | 0         | 0         | 0         | 0         | 0         | 2 | 21451846 | 21451960 |
| chd7                | 33.377344 | 43.082707 | 47.950452 | 50.313896 | 48.955852 | 44.324814 | 2 | 21562193 | 21617220 |
| rab2a               | 97.407452 | 76.117653 | 81.781842 | 102.74421 | 108.9776  | 108.23782 | 2 | 21618206 | 21644458 |
| ca8                 | 10.732609 | 10.597415 | 9.6078413 | 6.8880439 | 7.9713551 | 5.7177581 | 2 | 21651559 | 21675050 |
| CR847864.1          | 0         | 0         | 0         | 0         | 0         | 0         | 2 | 21685669 | 21685775 |
| tox                 | 17.8247   | 17.202273 | 18.317034 | 17.299345 | 17.599389 | 16.884856 | 2 | 21779436 | 21901069 |
| cyp7ala             | 0         | 0         | 0         | 0         | 0         | 0         | 2 | 21946657 | 21949389 |
| fam110b             | 1.9607305 | 1.4943643 | 2.0589415 | 1.0214045 | 1.9374007 | 2.2490783 | 2 | 22001581 | 22023508 |
| sept2               | 92.078821 | 87.465468 | 81.34445  | 97.889889 | 101.32524 | 103.04648 | 2 | 22049350 | 22073010 |
| stk25b              | 29.590317 | 23.948836 | 20.661917 | 16.400019 | 22.407992 | 19.38213  | 2 | 22075319 | 22094365 |
| bokb                | 1.2369883 | 0.8642027 | 0.8930267 | 0.7088236 | 0.2801035 | 1.3006598 | 2 | 22097859 | 22108079 |
| thap4               | 5.3168274 | 7.2385499 | 4.1336725 | 2.8123089 | 4.0748805 | 5.160462  | 2 | 22110767 | 22117094 |
| FBXO15 (1 of 2)     | 1.2216069 | 1.8207077 | 3.1749202 | 0         | 0.4425929 | 1.0275894 | 2 | 22117431 | 22134663 |
| 5S_rRNA (2 221303   | 0         | 0         | 0         | 0         | 0         | 0         | 2 | 22130366 | 22130480 |
| agxtb               | 0         | 0         | 0         | 0         | 0         | 0         | 2 | 22134387 | 22146295 |
| kiiflab             | 0.0830641 | 0.7737522 | 0.7196034 | 0.4759767 | 0.5266525 | 0.2329056 | 2 | 22152026 | 22216234 |
| 5S_rRNA (2 221593   | 0         | 0         | 0         | 0         | 0         | 0         | 2 | 22159306 | 22159420 |
| espnl               | 0         | 0.3668304 | 0         | 0.9026285 | 0         | 0         | 2 | 22223136 | 22246097 |
| rab6bb              | 4.4714219 | 1.1359598 | 4.695391  | 3.2610208 | 6.9955127 | 5.1289957 | 2 | 22253138 | 22259454 |
| aire                | 0         | 0         | 0.2914311 | 0.6939542 | 0         | 0         | 2 | 22266590 | 22304197 |
| amotl2b             | 11.724971 | 8.8831933 | 10.834792 | 15.229022 | 10.195206 | 11.397005 | 2 | 22309476 | 22318822 |
| myo7bb              | 0         | 0.0678044 | 0         | 0.5005217 | 0.1318597 | 0.5102417 | 2 | 22338706 | 22385207 |
| 5S_rRNA (2 223549   | 0         | 0         | 0         | 0         | 0         | 0         | 2 | 22354929 | 22355045 |
| sap130b             | 7.3434246 | 11.228734 | 10.202856 | 12.862055 | 13.05176  | 10.295217 | 2 | 22391020 | 22423741 |

|                      |           |           |           |           |           |           |   |          |          |
|----------------------|-----------|-----------|-----------|-----------|-----------|-----------|---|----------|----------|
| MLLT1 (2 of 2)       | 7.2162966 | 8.5673463 | 7.9677853 | 9.8918289 | 6.7925533 | 6.3479141 | 2 | 22427784 | 22451277 |
| zgc:136639os         | 0         | 0         | 0         | 0         | 0         | 0         | 2 | 22443926 | 22449165 |
| ZNF414               | 7.3577927 | 4.7449918 | 7.7634831 | 7.7837342 | 6.9207147 | 5.1576802 | 2 | 22451602 | 22461949 |
| mknk2a               | 1.0478754 | 1.4099355 | 1.0086656 | 0.26687   | 0.738207  | 0.326463  | 2 | 22464436 | 22482596 |
| csnk1g2a             | 21.145705 | 19.697492 | 24.258063 | 20.582284 | 19.808849 | 25.178385 | 2 | 22496685 | 22536392 |
| mfsd12a              | 2.1144998 | 1.2121128 | 2.1136624 | 0.932045  | 1.031277  | 0         | 2 | 22538891 | 22557288 |
| si:dkey-218h11.6     | 0         | 0         | 0         | 0         | 0         | 0         | 2 | 22588033 | 22589778 |
| prrx1a               | 14.430072 | 20.048778 | 27.544817 | 5.886245  | 5.7597392 | 6.5148879 | 2 | 22622894 | 22630352 |
| kiifap3b             | 5.2415695 | 3.733744  | 7.3455647 | 1.0600741 | 2.9323426 | 2.5935853 | 2 | 22680583 | 22750209 |
| fam129ab             | 0         | 1.2127771 | 0.5370973 | 0.2131556 | 0         | 0         | 2 | 22753914 | 22806760 |
| mf2                  | 60.183532 | 60.589784 | 59.825477 | 64.728674 | 52.624869 | 63.281359 | 2 | 22809088 | 22819674 |
| ivns1abpb            | 58.669598 | 59.390897 | 80.579149 | 24.599318 | 23.90605  | 24.073951 | 2 | 22837433 | 22849650 |
| si:ch73-129a22.11 (C | 0         | 0         | 0.3043309 | 0.9662284 | 0.7636427 | 0.5909954 | 2 | 22861058 | 22870500 |
| FP016152.1           | 0         | 0         | 1.6158    | 1.9237676 | 1.5204181 | 3.1378029 | 2 | 22890713 | 22896737 |
| si:ch73-129a22.11 (C | 1.6548009 | 0         | 0         | 0.6321601 | 0.4996173 | 0         | 2 | 22929932 | 22931788 |
| CLDN18               | 0         | 0         | 0         | 0         | 0         | 1.6127327 | 2 | 22977987 | 22981393 |
| hfm1                 | 0.1207696 | 0.1124984 | 0.5231278 | 0.2768154 | 0.1093883 | 0         | 2 | 22984098 | 23009022 |
| znf644a              | 6.1360062 | 4.828838  | 6.8738353 | 4.8497611 | 5.2702773 | 3.1146837 | 2 | 23014596 | 23039201 |
| lrrc8da              | 1.8031447 | 2.5194782 | 3.3845641 | 1.8598403 | 1.4698942 | 2.527944  | 2 | 23046115 | 23050291 |
| gtf2b                | 34.22525  | 41.029788 | 40.822652 | 50.138194 | 50.678019 | 50.068768 | 2 | 23053276 | 23065450 |
| pkn2                 | 4.4607676 | 4.6914243 | 6.4407792 | 6.4315414 | 4.9527281 | 5.6486257 | 2 | 23068424 | 23128679 |
| 5S_rRNA (2 23111C    | 0         | 0         | 0         | 0         | 0         | 0         | 2 | 23111019 | 23111135 |
| zgc:56628            | 0.3277064 | 0         | 0.4731662 | 0         | 0         | 0         | 2 | 23132627 | 23136270 |
| hs2st1a              | 9.4178375 | 11.185364 | 15.297925 | 13.49161  | 15.567793 | 11.222949 | 2 | 23149705 | 23181558 |
| sep15                | 159.41591 | 139.94806 | 129.7357  | 119.03063 | 133.45368 | 135.45174 | 2 | 23182115 | 23192145 |
| si:dkey-43b14.6      | 0         | 0.3104957 | 0         | 0.7640106 | 0         | 0         | 2 | 23194397 | 23196918 |
| si:dkey-43b14.7      | 0.9150075 | 0.2841137 | 0         | 0         | 0         | 0         | 2 | 23195649 | 23238279 |
| si:dkey-43b14.8      | 0.7291466 | 2.037628  | 1.0527947 | 0         | 1.3208633 | 0         | 2 | 23230502 | 23231814 |
| si:dkey-43b14.9      | 0         | 0         | 0         | 0         | 0.3001962 | 0.4646533 | 2 | 23235660 | 23238142 |
| si:dkey-43b14.3      | 0         | 0         | 0         | 0         | 0         | 0         | 2 | 23258737 | 23258827 |
| crsp7                | 4.2848016 | 3.991347  | 5.9054928 | 5.8034193 | 7.585592  | 7.0993445 | 2 | 23298624 | 23304670 |
| cnn2                 | 71.558665 | 63.8213   | 67.598694 | 44.49458  | 36.716982 | 37.087371 | 2 | 23309714 | 23315897 |
| angptl4              | 6.475501  | 13.815251 | 15.985137 | 14.842462 | 12.676503 | 8.1998627 | 2 | 23321879 | 23327384 |
| tps28                | 1140.0902 | 1050.5332 | 907.13715 | 970.78805 | 1036.8984 | 1011.1604 | 2 | 23354448 | 23356528 |
| 5S_rRNA (2 23358C    | 0         | 0         | 0         | 0         | 0         | 0         | 2 | 23358056 | 23358171 |
| si:rp71-39b20.4      | 0         | 0         | 0         | 0         | 0         | 0.8076937 | 2 | 23359248 | 23366668 |
| si:rp71-39b20.6      | 0         | 0         | 0         | 0         | 0         | 0         | 2 | 23366305 | 23379871 |
| insl3                | 0         | 0         | 0         | 0         | 0         | 0         | 2 | 23375494 | 23376826 |
| kcnn1a               | 0.5236577 | 0.3484241 | 0.6480814 | 0.6001366 | 0.4065498 | 0.2097569 | 2 | 23401945 | 23453652 |
| OCEL1                | 0         | 0         | 0         | 0         | 0.253555  | 0         | 2 | 23456213 | 23461254 |
| zgc:154006           | 0.679593  | 0.422033  | 0.3270819 | 0         | 0         | 0         | 2 | 23461785 | 23477693 |
| nr2f6a               | 24.639804 | 26.451114 | 25.380962 | 31.509902 | 28.577595 | 24.64428  | 2 | 23477764 | 23489841 |
| si:dkey-208k22.3     | 0         | 0         | 0         | 0         | 0         | 0         | 2 | 23495059 | 23498314 |
| si:dkey-208k22.2     | 1.3725113 | 1.9177675 | 0.4954328 | 1.572963  | 0.6215827 | 0         | 2 | 23508686 | 23511649 |
| si:dkey-208k22.1     | 0         | 0         | 1.2641437 | 0         | 0         | 0         | 2 | 23513106 | 23515557 |
| ano8a                | 0.1779763 | 0.0828936 | 0.1284875 | 0.815877  | 1.0478244 | 0.2495164 | 2 | 23515198 | 23544177 |
| mrpl34               | 71.21825  | 62.165413 | 61.841858 | 53.081205 | 74.430715 | 53.0647   | 2 | 23543963 | 23546681 |
| C2H6orf52            | 28.696626 | 27.974585 | 38.543503 | 39.771162 | 35.210427 | 35.085729 | 2 | 23546710 | 23553511 |
| fitm1                | 13.342043 | 8.2855215 | 8.2560892 | 0         | 2.8773059 | 0.8907174 | 2 | 23555464 | 23559292 |
| vmhcl                | 0         | 0.0642373 | 0.0995698 | 0.1580634 | 0         | 0.0966798 | 2 | 23574503 | 23589822 |
| vmhc                 | 2.259259  | 4.4267666 | 3.8245097 | 0.0892834 | 0.0705636 | 0.1092207 | 2 | 23594235 | 23607626 |
| mir736               | 0         | 0         | 0         | 0         | 0         | 0         | 2 | 23602850 | 23602929 |
| MAP4 (1 of 3)        | 0.2083586 | 0.2587849 | 0.2005622 | 0         | 0         | 0.1947409 | 2 | 23611810 | 23687140 |
| kcnh2                | 0         | 0.3466459 | 0         | 0.1421604 | 0.1123541 | 0         | 2 | 23695890 | 23783096 |
| si:dkeyp-99c4.5      | 0         | 0         | 0         | 0         | 0         | 0         | 2 | 23758671 | 23788133 |
| si:dkeyp-99c4.4      | 2.5710956 | 2.3950081 | 9.2808349 | 13.259688 | 17.46596  | 28.836668 | 2 | 23795298 | 23796544 |
| slc12a7a             | 2.4033675 | 5.3481661 | 5.0124475 | 14.99603  | 11.247179 | 8.9851591 | 2 | 23802571 | 23832951 |
| si:dkeyp-99c4.2      | 0         | 0         | 0         | 0         | 0         | 0         | 2 | 23849203 | 23850896 |
| coll5a1b             | 19.686526 | 18.940914 | 21.618886 | 16.418132 | 19.756703 | 15.67876  | 2 | 23850967 | 23927192 |
| igfbr1a              | 2.4661683 | 4.594534  | 2.7695363 | 4.7105761 | 7.942243  | 11.909095 | 2 | 23932610 | 24008101 |
| VOPP1 (2 of 2)       | 0         | 0         | 0         | 0         | 0         | 0         | 2 | 24026726 | 24040524 |
| gorasp1              | 9.5125592 | 4.8485097 | 9.9772545 | 17.586936 | 14.305965 | 10.694175 | 2 | 24043868 | 24055506 |
| csnrla               | 2.6836324 | 5.2774348 | 4.7358944 | 6.8345994 | 4.3212907 | 2.9262769 | 2 | 24060404 | 24073222 |
| si:dkey-24c2.7       | 2.9818137 | 0         | 0         | 0         | 0         | 0         | 2 | 24080107 | 24091068 |
| xirpl                | 6.7123071 | 7.0825901 | 11.235528 | 7.0799351 | 5.8645253 | 6.2458493 | 2 | 24106798 | 24114653 |

|                     |           |           |           |           |           |           |   |          |          |
|---------------------|-----------|-----------|-----------|-----------|-----------|-----------|---|----------|----------|
| si:dkey-24c2.6      | 0         | 0         | 0         | 1.0351111 | 0         | 0         | 2 | 24123890 | 24132952 |
| oxsr1a              | 5.0149452 | 8.3594994 | 10.67086  | 15.72963  | 11.475373 | 11.841301 | 2 | 24142810 | 24162533 |
| 5S_rRNA (2 24184)   | 0         | 0         | 0         | 0         | 0         | 0         | 2 | 24184157 | 24184273 |
| cdyl                | 3.7417834 | 4.7303467 | 3.087233  | 5.207174  | 7.7466436 | 7.4940653 | 2 | 24187298 | 24239708 |
| ppp40               | 9.3783518 | 6.6273509 | 9.3387195 | 4.4474628 | 9.9591076 | 4.9872148 | 2 | 24243923 | 24251106 |
| si:dkey-58b18.8     | 0         | 0         | 0         | 0         | 1.0755121 | 0.8323561 | 2 | 24255064 | 24259492 |
| si:dkey-58b18.9     | 0         | 0         | 0         | 0         | 0         | 0         | 2 | 24261085 | 24261683 |
| si:dkey-58b18.10 (2 | 0         | 0         | 0         | 0         | 0         | 0         | 2 | 24263325 | 24264250 |
| si:dkey-58b18.5     | 0         | 0         | 0         | 0         | 0.5418926 | 0.8387588 | 2 | 24286474 | 24290464 |
| si:dkey-58b18.6     | 0.7302877 | 0         | 0         | 0         | 0         | 0         | 2 | 24292042 | 24292916 |
| si:dkey-58b18.10 (2 | 0         | 0         | 0         | 0         | 0         | 0         | 2 | 24294313 | 24295239 |
| si:dkey-58b18.2     | 0         | 0         | 0         | 0         | 0.5418926 | 0.8387588 | 2 | 24317519 | 24321510 |
| si:dkey-58b18.3     | 0         | 0         | 0         | 0         | 0.6165955 | 1.4315796 | 2 | 24317628 | 24325424 |
| si:dkey-58b18.10 (2 | 0         | 0         | 0         | 0         | 0         | 0         | 2 | 24325352 | 24326278 |
| CRTC1 (1 of 2)      | 0         | 0.9790405 | 1.8969274 | 0.9033909 | 0.2379934 | 0         | 2 | 24347533 | 24372807 |
| MAST3 (2 of 2)      | 2.2822196 | 5.3707363 | 4.3358341 | 6.4699995 | 5.4398487 | 5.5571822 | 2 | 24410684 | 24452847 |
| pik3r2              | 4.9064073 | 4.7396539 | 8.9208773 | 11.454208 | 9.7110196 | 8.1524224 | 2 | 24470404 | 24517964 |
| lfi30               | 90.653248 | 84.800955 | 88.36572  | 198.14176 | 226.23573 | 205.92217 | 2 | 24532156 | 24537113 |
| mpv17l2             | 23.885034 | 20.858636 | 19.829991 | 31.137219 | 31.910299 | 36.834553 | 2 | 24540024 | 24548501 |
| pde4ca              | 0.3104816 | 0.1446088 | 0         | 0.3558266 | 0.5624434 | 0         | 2 | 24550615 | 24632413 |
| U3 (2 24598592.24   | 0         | 0         | 0         | 0         | 0         | 0         | 2 | 24598593 | 24598798 |
| rab3aa              | 0.9689656 | 1.0831245 | 2.5183129 | 1.1104805 | 1.93083   | 1.3584549 | 2 | 24637599 | 24648248 |
| si:dkey-149i17.7    | 0         | 0         | 0         | 0         | 0         | 0         | 2 | 24655576 | 24656341 |
| si:dkey-149i17.9    | 0         | 0         | 0         | 0         | 0         | 0         | 2 | 24666576 | 24668529 |
| si:dkey-149i17.8    | 0         | 0         | 0         | 0         | 0         | 0         | 2 | 24666576 | 24671484 |
| agtr1a              | 0         | 0         | 0         | 0         | 0         | 0         | 2 | 24701266 | 24702342 |
| eyg1a               | 3.5568129 | 4.6385027 | 5.9059215 | 4.076276  | 5.3156692 | 3.7398927 | 2 | 24706355 | 24714408 |
| hlf                 | 6.0416766 | 6.7290088 | 8.9130495 | 6.3219564 | 5.1154175 | 6.8129975 | 2 | 24713629 | 24731591 |
| nck1a               | 1.0789684 | 1.256341  | 1.5578927 | 1.8548234 | 0.9772861 | 1.8908436 | 2 | 24733456 | 24750945 |
| slc35g2a            | 0.193552  | 0.1802961 | 0         | 0         | 0         | 0         | 2 | 24759987 | 24766030 |
| stag1a              | 2.6248566 | 3.2955522 | 6.9207928 | 1.5695008 | 1.6539056 | 0.6399921 | 2 | 24788976 | 24875072 |
| pccb                | 16.907748 | 22.469688 | 21.808617 | 28.161356 | 27.565842 | 26.864595 | 2 | 24878158 | 24889628 |
| msl2a               | 4.2516373 | 5.4626952 | 5.5037713 | 7.0568366 | 5.3116713 | 7.1938789 | 2 | 24894944 | 24898998 |
| nceh1a              | 2.9913708 | 2.0898749 | 2.1595789 | 1.1427509 | 2.0320973 | 2.7958628 | 2 | 24901206 | 24909611 |
| 5S_rRNA (2 249254   | 0         | 0         | 0         | 0         | 0         | 0         | 2 | 24925431 | 24925547 |
| si:dkey-223d7.6     | 0         | 0         | 0         | 0         | 0         | 0         | 2 | 24927931 | 24928898 |
| si:dkeyp-7b3.1      | 8.9914036 | 6.7004851 | 6.4912198 | 4.1218297 | 2.8504178 | 4.4119685 | 2 | 24990341 | 24995543 |
| si:dkey-5n7.1       | 0         | 0         | 0         | 0         | 0         | 0         | 2 | 25219747 | 25346191 |
| si:dkey-5n7.2       | 0         | 0         | 0         | 1.4092422 | 1.1137714 | 0         | 2 | 25230338 | 25231382 |
| ppp2r3a             | 0         | 0.7028197 | 0.9078262 | 0         | 0.569491  | 0.5288859 | 2 | 25393831 | 25437998 |
| Indc3ba             | 0.9973604 | 1.7548795 | 3.0401291 | 3.6830717 | 2.1078606 | 4.3501527 | 2 | 25463828 | 25688438 |
| ghsra               | 0         | 0         | 0         | 0         | 0         | 0         | 2 | 25699627 | 25701802 |
| pld1a               | 2.08607   | 1.7488805 | 2.7108169 | 2.7493452 | 0.6613173 | 0.4386892 | 2 | 25708726 | 25780260 |
| tmika               | 1.582548  | 2.3955157 | 3.4274961 | 4.0807687 | 3.4043445 | 2.634677  | 2 | 25806282 | 25963360 |
| si:dkey-153n9.5     | 2.2195189 | 2.06751   | 0         | 1.2718369 | 3.5181138 | 2.3337642 | 2 | 25962722 | 25965002 |
| slc2a2              | 10.886628 | 17.815327 | 15.718902 | 42.319249 | 37.443892 | 30.31907  | 2 | 25965013 | 25986156 |
| eif5a2              | 308.34261 | 296.48041 | 313.94054 | 214.45435 | 244.18627 | 267.21821 | 2 | 25987363 | 25993197 |
| si:dkey-153n9.4     | 0         | 0         | 0         | 0         | 5.196839  | 0         | 2 | 26000849 | 26001969 |
| 5S_rRNA (2 260037   | 0         | 0         | 0         | 0         | 0         | 0         | 2 | 26003798 | 26003915 |
| slc7a14a            | 0.0787203 | 0.2933158 | 0.2273241 | 0.541303  | 0.7130166 | 0.772541  | 2 | 26016574 | 26139598 |
| cldn11a             | 0         | 0         | 0.5119974 | 0         | 0         | 0         | 2 | 26145596 | 26149343 |
| si:ch211-253d24.1   | 0         | 0         | 0         | 0         | 0         | 0         | 2 | 26182345 | 26187776 |
| si:ch211-253d24.2   | 0         | 0.4242987 | 0         | 0         | 0         | 0         | 2 | 26202283 | 26206082 |
| grin3b              | 0         | 0.1294888 | 0.2007115 | 0.3186222 | 0         | 0.1948859 | 2 | 26208810 | 26304333 |
| 5S_rRNA (2 262333   | 0         | 0         | 0         | 0         | 0         | 0         | 2 | 26233332 | 26233449 |
| lppr3a              | 12.706833 | 18.183726 | 18.347046 | 17.728422 | 17.681011 | 12.392712 | 2 | 26327266 | 26356309 |
| palm1b              | 17.265378 | 15.627741 | 12.464501 | 15.120209 | 18.736434 | 21.236847 | 2 | 26385492 | 26432415 |
| si:dkey-57i11.4     | 0         | 0         | 0         | 0         | 0         | 0         | 2 | 26434635 | 26435675 |
| ptbp1a              | 47.807894 | 39.057362 | 46.766407 | 36.611489 | 35.867701 | 39.033089 | 2 | 26436471 | 26448682 |
| efna2               | 4.9232509 | 4.5860705 | 3.554273  | 2.6196293 | 4.6185422 | 3.4511102 | 2 | 26451797 | 26592673 |
| si:dkey-15h14.4     | 0         | 0         | 0         | 0         | 0         | 0         | 2 | 26583106 | 26584283 |
| rabggtb             | 14.324962 | 20.355077 | 12.970957 | 16.417085 | 21.331735 | 27.912079 | 2 | 26611284 | 26617263 |
| acadm               | 12.981258 | 16.470419 | 14.86536  | 13.08162  | 12.974235 | 18.199257 | 2 | 26618240 | 26624320 |
| hectd3              | 10.370086 | 16.137658 | 14.796926 | 16.638453 | 15.581007 | 17.959307 | 2 | 26627846 | 26643214 |
| rps8a               | 1660.9713 | 1758.8465 | 1616.1476 | 1366.5564 | 1413.5321 | 1558.5326 | 2 | 26646616 | 26650038 |

|                    |           |           |           |           |           |           |   |          |          |
|--------------------|-----------|-----------|-----------|-----------|-----------|-----------|---|----------|----------|
| SNORD46            | 0         | 0         | 0         | 0         | 0         | 0         | 2 | 26647819 | 26647924 |
| SNORD38            | 0         | 0         | 0         | 0         | 0         | 0         | 2 | 26649203 | 26649273 |
| SNORA47            | 0         | 0         | 0         | 0         | 0         | 0         | 2 | 26649938 | 26650070 |
| best4              | 0         | 0         | 0         | 0         | 0         | 0         | 2 | 26653135 | 26657227 |
| si:ch211-106k21.5  | 7.6230813 | 7.1009967 | 7.1293764 | 9.2327991 | 12.004727 | 9.958607  | 2 | 26662307 | 26675900 |
| glis1a             | 0         | 0         | 0         | 0         | 0         | 0.3839389 | 2 | 26677617 | 26712148 |
| ndc1               | 29.540473 | 23.263439 | 29.259322 | 24.3689   | 25.463982 | 26.20929  | 2 | 26725023 | 26738798 |
| zgc:113691         | 1.4027671 | 3.0489557 | 3.3756945 | 0.5358792 | 2.1176164 | 0.655543  | 2 | 26740138 | 26744964 |
| yipf1              | 4.7723604 | 4.4455141 | 3.2955423 | 8.0851275 | 4.6984909 | 4.0725863 | 2 | 26746971 | 26752488 |
| lrrc42             | 3.0361343 | 5.0907557 | 3.5070325 | 2.783643  | 1.9250057 | 5.1078613 | 2 | 26752943 | 26759203 |
| tmem59             | 16.101607 | 14.453438 | 14.371903 | 16.104614 | 17.766191 | 20.932137 | 2 | 26760744 | 26769072 |
| u2surp             | 21.611756 | 20.87724  | 29.55358  | 30.272117 | 22.785781 | 20.359581 | 2 | 26771547 | 26791114 |
| mir124-1           | 0         | 0         | 0         | 0         | 0         | 0         | 2 | 26793487 | 26793568 |
| itpa               | 0         | 0         | 0         | 0         | 0.2198004 | 0         | 2 | 26795642 | 26801318 |
| asph               | 90.00596  | 80.909522 | 86.63808  | 98.52902  | 95.779292 | 74.056183 | 2 | 26804453 | 26830352 |
| si:dkey-181m9.5    | 0         | 0         | 0         | 0         | 0         | 0         | 2 | 26815850 | 26821017 |
| impal              | 17.046716 | 14.555962 | 18.972739 | 14.652258 | 8.3634568 | 14.936801 | 2 | 26831083 | 26837078 |
| si:dkey-181m9.8    | 0.9865832 | 1.9215763 | 1.0360002 | 1.850189  | 1.8684516 | 1.1316716 | 2 | 26838033 | 26869024 |
| si:dkey-148a12.2   | 0         | 3.4961981 | 14.45123  | 2.8676    | 6.7990816 | 7.0158917 | 2 | 27148712 | 27158515 |
| cdh7               | 5.3208954 | 8.4365642 | 8.8269251 | 4.670807  | 3.7940371 | 5.0789473 | 2 | 27158567 | 27244127 |
| 5S_rRNA (2 271878) | 0         | 0         | 0         | 0         | 0         | 0         | 2 | 27187858 | 27187974 |
| 5S_rRNA (2 273818) | 0         | 0         | 0         | 0         | 0         | 0         | 2 | 27381836 | 27381951 |
| dsel               | 0.3914881 | 0.1215587 | 0         | 0         | 0.2363961 | 0         | 2 | 27460033 | 27463608 |
| tmx3               | 0         | 0         | 0         | 0         | 0         | 0         | 2 | 27466576 | 27478351 |
| si:dkey-40i22.5    | 0         | 0         | 0         | 0         | 0         | 0         | 2 | 27469184 | 27472351 |
| tesk2              | 3.0753692 | 3.8611785 | 2.702877  | 2.9115589 | 2.5433241 | 3.1868029 | 2 | 27478631 | 27527497 |
| toe1               | 10.218697 | 5.892619  | 11.944115 | 12.268783 | 15.205767 | 11.256336 | 2 | 27526657 | 27534104 |
| si:ch73-382f3.1    | 5.1191819 | 3.5136926 | 5.0573048 | 8.0282867 | 8.0533002 | 4.5327845 | 2 | 27534787 | 27539728 |
| sepp1b             | 49.029297 | 49.477362 | 42.559506 | 120.07246 | 114.72263 | 69.964762 | 2 | 27542968 | 27549275 |
| zgc:153394         | 0         | 0.9805127 | 0.506608  | 2.412665  | 1.5890084 | 0         | 2 | 27551470 | 27557876 |
| si:ch73-176g19.2   | 0         | 0         | 0         | 0         | 0         | 0         | 2 | 27632729 | 27633479 |
| zswim5             | 17.083667 | 18.07735  | 18.608163 | 26.362536 | 22.735475 | 20.168999 | 2 | 27639236 | 27692112 |
| urod               | 39.369404 | 50.131116 | 36.505575 | 26.905945 | 31.733433 | 36.458744 | 2 | 27704338 | 27723973 |
| lyn                | 0         | 0         | 0.2041784 | 0         | 0         | 0         | 2 | 27725640 | 27757359 |
| rgs1               | 6.2386878 | 2.8226881 | 3.8605153 | 3.8813372 | 2.5832009 | 1.9991807 | 2 | 27761944 | 27799950 |
| tmem68 (2 2780337) | 1.8741118 | 1.7457589 | 1.3529892 | 4.2956418 | 0.8487475 | 3.941156  | 2 | 27803371 | 27804687 |
| tmem68 (2 2782390) | 0.9314448 | 0         | 0         | 0         | 4.2183258 | 3.9175563 | 2 | 27823907 | 27827694 |
| CABZ01085085.1     | 1.7283476 | 4.0249442 | 3.7432701 | 3.4663443 | 0.3913669 | 0         | 2 | 27829274 | 27849933 |
| dhcr7              | 2.0966476 | 2.5110691 | 2.8110565 | 1.029796  | 3.9337648 | 3.9892189 | 2 | 27967560 | 27989080 |
| nadsyn1            | 0.7777564 | 2.4149665 | 2.245962  | 1.4855761 | 0.9392805 | 2.5442352 | 2 | 27990088 | 28011192 |
| CU693487.1         | 2.1874399 | 4.075256  | 4.2111788 | 4.7352739 | 2.2014388 | 0.6814916 | 2 | 28011847 | 28021904 |
| buc                | 0         | 0         | 0         | 0         | 0         | 0         | 2 | 28022981 | 28027100 |
| rnf152             | 2.3568376 | 2.9272321 | 4.5372971 | 0.9003492 | 7.1157617 | 5.5070025 | 2 | 28037861 | 28038454 |
| zgc:163121         | 1.8079572 | 0         | 0.8701532 | 0.6906682 | 0         | 0         | 2 | 28045787 | 28068414 |
| mc4r               | 0         | 0         | 0         | 0         | 0         | 0         | 2 | 28100596 | 28101736 |
| C2H5orf22          | 2.0220918 | 3.7672082 | 0.3244047 | 0         | 1.4245227 | 0.6299978 | 2 | 28125521 | 28143409 |
| 5S_rRNA (2 28173)  | 0         | 0         | 0         | 0         | 0         | 0         | 2 | 28173131 | 28173245 |
| cdh6               | 23.517786 | 30.629393 | 27.511201 | 29.697658 | 29.7826   | 28.086484 | 2 | 28216925 | 28270171 |
| cdh10              | 0         | 0         | 0.2444806 | 0         | 0         | 0         | 2 | 28604768 | 28649116 |
| CDH12 (2 of 2)     | 0         | 0         | 0         | 0         | 0         | 0         | 2 | 28710608 | 28831724 |
| cdh18              | 1.9884052 | 1.1576404 | 0.7177509 | 0.712127  | 0.5628179 | 0.8711477 | 2 | 28964393 | 29067510 |
| cahz               | 23.101676 | 26.729488 | 30.195842 | 33.442881 | 40.087064 | 45.001882 | 2 | 29192215 | 29200240 |
| 5S_rRNA (2 292156) | 0         | 0         | 0         | 0         | 0         | 0         | 2 | 29215697 | 29215811 |
| dlgap1a            | 0         | 0         | 0         | 0         | 0.2812217 | 0         | 2 | 29324946 | 29407657 |
| 5S_rRNA (2 293927) | 0         | 0         | 0         | 0         | 0         | 0         | 2 | 29392742 | 29392860 |
| ptf1a              | 0         | 1.6341879 | 0.8443466 | 0         | 0         | 0         | 2 | 29425689 | 29426593 |
| si:ch211-142h2.1   | 0         | 0         | 0         | 0         | 0         | 0         | 2 | 29427529 | 29441760 |
| C2H10orf67         | 0         | 0         | 0         | 0         | 0         | 0         | 2 | 29441590 | 29476797 |
| si:dkey-188g12.2   | 0         | 0         | 0         | 1.2389361 | 0         | 0         | 2 | 29479227 | 29482122 |
| si:ch211-207d6.4   | 0         | 0.8049888 | 0         | 0.9903841 | 0         | 1.2115406 | 2 | 29557420 | 29614710 |
| si:ch211-207d6.2   | 0.1642569 | 0.5355258 | 1.422996  | 1.6000926 | 2.1572705 | 0.921129  | 2 | 29557670 | 29608149 |
| paxipl             | 16.147192 | 17.586767 | 23.493827 | 16.085504 | 13.725446 | 9.5775231 | 2 | 29617508 | 29638235 |
| hnr5a              | 0         | 0.9525799 | 0.4921758 | 0.781311  | 0.9262445 | 0.4778904 | 2 | 29640509 | 29653812 |
| eng2b              | 19.177555 | 10.718481 | 11.445176 | 7.9122191 | 4.8636718 | 5.0187653 | 2 | 29691251 | 29694788 |
| cnpy1              | 20.209419 | 22.248117 | 27.057653 | 14.738787 | 18.304877 | 20.090586 | 2 | 29701087 | 29710868 |

|                   |           |           |           |           |           |           |   |          |          |
|-------------------|-----------|-----------|-----------|-----------|-----------|-----------|---|----------|----------|
| RBM33             | 0         | 0         | 1.3784546 | 0         | 0         | 0.535378  | 2 | 29710422 | 29762469 |
| shhb              | 3.6980989 | 3.4448259 | 5.3395829 | 3.7084218 | 2.5121916 | 1.620188  | 2 | 29765373 | 29770264 |
| dnajb6a           | 24.229499 | 23.742557 | 29.532205 | 23.801274 | 19.09596  | 24.704644 | 2 | 29818117 | 29833015 |
| 5S_rRNA (2 298284 | 0         | 0         | 0         | 0         | 0         | 0         | 2 | 29828467 | 29828581 |
| trpala            | 0         | 0.4096056 | 0.1587252 | 0         | 0.1991408 | 0         | 2 | 29831318 | 29850278 |
| kcnb2             | 0.1965272 | 0.3661352 | 0         | 0.450459  | 0.1780064 | 0.4132861 | 2 | 29859811 | 29892301 |
| rpl7              | 2475.6458 | 2763.3818 | 2308.6501 | 2093.4184 | 2163.4189 | 2201.972  | 2 | 29892308 | 29897185 |
| SNORD12 (2 29895  | 0         | 0         | 0         | 0         | 0         | 0         | 2 | 29895962 | 29896051 |
| rdh10b            | 23.55269  | 16.876638 | 16.816687 | 21.356702 | 36.102131 | 44.994318 | 2 | 29897263 | 29901139 |
| ube2w             | 1.3964704 | 1.7344398 | 2.3523792 | 3.734316  | 1.8972998 | 2.9367018 | 2 | 29908579 | 29915038 |
| tceb1b            | 31.935808 | 24.284579 | 38.112345 | 26.14282  | 22.727703 | 26.498219 | 2 | 29960685 | 29964617 |
| tmem70            | 10.467002 | 11.781425 | 15.113016 | 9.4965801 | 20.541275 | 12.228634 | 2 | 29964809 | 29967179 |
| si:dkey-82k12.7   | 16.824332 | 14.022386 | 21.735117 | 11.162963 | 7.2183798 | 7.4485605 | 2 | 29984138 | 29984995 |
| si:dkey-82k12.8   | 0.906124  | 1.6881319 | 2.6166548 | 0         | 0         | 0         | 2 | 29991049 | 29991894 |
| jph1b             | 1.2403676 | 2.1824564 | 2.785895  | 1.5794666 | 1.1234749 | 2.3186009 | 2 | 30005551 | 30039129 |
| CR788254.1        | 0         | 0         | 0         | 0         | 0         | 0         | 2 | 30061436 | 30062203 |
| 5S_rRNA (2 300758 | 0         | 0         | 0         | 0         | 0         | 0         | 2 | 30075845 | 30075960 |
| pi15b             | 0         | 0         | 0         | 0         | 0         | 0         | 2 | 30083902 | 30087881 |
| crispld1b         | 0         | 0         | 0         | 0         | 0         | 0         | 2 | 30094482 | 30111291 |
| socs6b            | 9.3117059 | 9.9537382 | 10.579605 | 11.721327 | 10.093348 | 11.984621 | 2 | 30138260 | 30145177 |
| cbln2a            | 0         | 0         | 0         | 0         | 0         | 0         | 2 | 30173538 | 30175125 |
| netol             | 0.2559813 | 0         | 0         | 0         | 0         | 0         | 2 | 30178657 | 30191780 |
| fam173b           | 10.251231 | 11.209873 | 7.7225056 | 10.215996 | 8.477747  | 9.3729498 | 2 | 30195739 | 30198041 |
| march6            | 4.3163274 | 8.5897063 | 8.215207  | 14.502871 | 10.840131 | 9.6271249 | 2 | 30204678 | 30241553 |
| ankrd33bb         | 0         | 0         | 0         | 0.3906555 | 0.9262445 | 0         | 2 | 30246558 | 30264097 |
| ctnnd2b           | 7.2879078 | 6.4351962 | 9.426683  | 7.4822575 | 5.6384337 | 5.8537098 | 2 | 30269088 | 30408574 |
| GPR141 (1 of 2)   | 0         | 0         | 0         | 0         | 0         | 0         | 2 | 30428700 | 30436334 |
| si:dkey-94e7.2    | 0         | 0         | 0         | 0         | 0         | 0         | 2 | 30435902 | 30441252 |
| rpl               | 0         | 0         | 0         | 0         | 0         | 0         | 2 | 30441997 | 30448963 |
| tceal             | 55.248659 | 46.639998 | 63.390261 | 75.189625 | 63.222715 | 81.260305 | 2 | 30454512 | 30462842 |
| 5S_rRNA (2 304668 | 0         | 0         | 0         | 0         | 0         | 0         | 2 | 30466809 | 30466941 |
| rgs20             | 0.4210157 | 0.0784363 | 0         | 0.1930016 | 0.1525356 | 0         | 2 | 30467360 | 30499334 |
| atp6v1h           | 24.512945 | 24.948389 | 23.267992 | 29.653718 | 28.987038 | 32.45703  | 2 | 30501605 | 30561705 |
| oprk1             | 0         | 0         | 0         | 0         | 0         | 0         | 2 | 30593696 | 30601399 |
| chmp5a            | 0.8991404 | 2.0939016 | 3.2456099 | 0.5152287 | 0.4072025 | 1.2605624 | 2 | 30609427 | 30615952 |
| bag1              | 32.716102 | 24.112454 | 22.840292 | 30.077766 | 28.656016 | 21.169291 | 2 | 30618901 | 30623132 |
| myl12.2           | 106.7374  | 115.27796 | 92.320208 | 80.959795 | 72.859109 | 79.519899 | 2 | 30624964 | 30627754 |
| myom1a            | 0.7817957 | 1.4565052 | 1.3545759 | 0.8063774 | 0.5664952 | 1.2056544 | 2 | 30631020 | 30674745 |
| lipin2            | 4.1707839 | 3.6202423 | 3.2847708 | 13.470672 | 11.590756 | 9.8340769 | 2 | 30675183 | 30699340 |
| emilin2a          | 4.8490926 | 3.4541697 | 3.2948098 | 3.9227927 | 2.8419552 | 3.199178  | 2 | 30701828 | 30732894 |
| si:ch211-20915.1  | 0         | 0         | 0         | 0         | 3.0083718 | 0         | 2 | 30816810 | 30817295 |
| si:ch211-20915.2  | 0         | 0         | 0         | 0         | 0         | 0         | 2 | 30823651 | 30824136 |
| ves1              | 24.003228 | 23.445593 | 30.869116 | 26.506489 | 27.022409 | 25.340927 | 2 | 30986804 | 31079129 |
| adcypap1b         | 0.142056  | 0.3969808 | 1.2306641 | 0.1628029 | 0.6433428 | 0         | 2 | 31012872 | 31018341 |
| clul1             | 0.6714444 | 0.4169726 | 1.29264   | 0         | 0         | 0         | 2 | 31079008 | 31092329 |
| colec12           | 10.264484 | 9.8270938 | 11.664365 | 6.971013  | 7.4032906 | 5.0633019 | 2 | 31098312 | 31150880 |
| stam              | 15.818775 | 18.711605 | 17.402127 | 19.136235 | 18.421725 | 18.129106 | 2 | 31153269 | 31168328 |
| si:dkey-32m20.1   | 0         | 0         | 0         | 0         | 0.7692015 | 0         | 2 | 31170284 | 31173582 |
| cacnb2b           | 0.1353797 | 0.7566475 | 0         | 0         | 0.245243  | 0.1897975 | 2 | 31191494 | 31229079 |
| mrc1b             | 0         | 0.0712613 | 0         | 0         | 0         | 0         | 2 | 31231575 | 31256560 |
| CR293515.1        | 0         | 0.2634509 | 0         | 0         | 0         | 0         | 2 | 31289455 | 31295411 |
| si:ch211-106h4.4  | 0         | 0.2943087 | 0         | 1.8104516 | 0.2861721 | 0         | 2 | 31316383 | 31322411 |
| si:ch211-106h4.5  | 0         | 0.5971071 | 0.9255338 | 0.7346256 | 0         | 0         | 2 | 31326756 | 31330113 |
| PLXDC2 (2 of 2)   | 0.432621  | 0.5373226 | 0.2082165 | 0         | 0         | 0.202173  | 2 | 31330255 | 31341931 |
| MYRIP (2 of 2)    | 0         | 0         | 0         | 0.1235406 | 0         | 0         | 2 | 31342538 | 31377331 |
| si:ch211-106h4.12 | 0         | 0         | 0         | 0         | 0         | 0         | 2 | 31381558 | 31384833 |
| ccr11a            | 0         | 0         | 0         | 0         | 0.3557881 | 0.5507003 | 2 | 31387229 | 31390125 |
| e2f5              | 0.5699589 | 1.1945788 | 1.0286849 | 1.4696997 | 0.1290614 | 1.5981237 | 2 | 31392512 | 31402125 |
| lrcc1             | 1.6907748 | 2.4937154 | 3.8653332 | 2.906562  | 3.3181106 | 3.7531419 | 2 | 31403044 | 31426473 |
| CABZ01071757.1    | 0         | 0         | 0         | 0         | 0         | 0         | 2 | 31436090 | 31451928 |
| and2              | 0         | 0         | 0         | 0.2670032 | 0         | 0         | 2 | 31480049 | 31484497 |
| BX323064.1        | 3.0367929 | 1.2572494 | 2.4359675 | 0.7734019 | 1.2224909 | 0.4730527 | 2 | 31499718 | 31518539 |
| zgc:153414        | 0         | 0         | 0         | 0         | 0.8263465 | 0         | 2 | 31522457 | 31523479 |
| ranbp9            | 20.926182 | 23.976394 | 21.452463 | 24.941691 | 23.503074 | 28.164243 | 2 | 31524535 | 31544786 |
| not1              | 85.507723 | 92.785555 | 87.999682 | 85.485784 | 95.98788  | 85.445492 | 2 | 31548060 | 31551114 |

|                    |           |           |           |           |           |           |   |          |          |
|--------------------|-----------|-----------|-----------|-----------|-----------|-----------|---|----------|----------|
| epdr1              | 0.3328487 | 2.4804221 | 0.480591  | 0.7629207 | 0.9044427 | 0.9332837 | 2 | 31551907 | 31554777 |
| stard3nl           | 2.5182649 | 2.7066872 | 3.6360531 | 2.6640469 | 2.6318571 | 3.5305167 | 2 | 31556322 | 31570969 |
| 5S_rRNA (2 316052) | 0         | 0         | 0         | 0         | 0         | 0         | 2 | 31605285 | 31605399 |
| amph               | 1.6031624 | 0.9955774 | 0.7715873 | 1.6841917 | 0.36302   | 0.561894  | 2 | 31609102 | 31654841 |
| 5S_rRNA (2 316338) | 0         | 0         | 0         | 0         | 0         | 0         | 2 | 31633882 | 31633998 |
| fam105bb           | 7.2237438 | 8.2991109 | 5.9104264 | 3.5874594 | 4.7981823 | 4.3885525 | 2 | 31660265 | 31669876 |
| ankhb              | 3.5126372 | 3.7628759 | 3.2966699 | 3.6230837 | 2.7043644 | 5.1708204 | 2 | 31675429 | 31724187 |
| mycb               | 21.001984 | 30.776906 | 31.0638   | 48.138537 | 30.853974 | 31.239394 | 2 | 31734131 | 31736246 |
| si:ch211-139k8.2   | 1.3117466 | 0.9164314 | 1.8939947 | 0         | 0.2970318 | 0         | 2 | 31737582 | 31807885 |
| si:ch211-139k8.3   | 0         | 0         | 1.6275087 | 0         | 0         | 0         | 2 | 31807106 | 31809856 |
| si:ch211-139k8.4   | 0.3451582 | 0.3215192 | 0         | 0.3955676 | 0.3126304 | 0         | 2 | 31833726 | 31837071 |
| fam49ba            | 10.233637 | 9.151452  | 8.274597  | 9.1480214 | 11.123059 | 10.043034 | 2 | 31933330 | 31980162 |
| asap1a             | 6.6610972 | 8.5463667 | 9.6177744 | 9.6504433 | 8.0824167 | 8.2814164 | 2 | 31985773 | 32070919 |
| 5S_rRNA (2 320112) | 0         | 0         | 0         | 0         | 0         | 0         | 2 | 32011276 | 32011391 |
| si:ch211-160i2.4   | 0         | 2.1734698 | 0         | 0         | 0         | 3.2711595 | 2 | 32073303 | 32073925 |
| ubtfl              | 15.118375 | 14.787106 | 16.553662 | 12.99478  | 11.069005 | 8.8314241 | 2 | 32075481 | 32105316 |
| slc4a2a            | 1.3753429 | 1.4733217 | 2.4822746 | 5.2014867 | 5.4189262 | 6.6522253 | 2 | 32109772 | 32175798 |
| ttc19              | 2.9457371 | 2.0579935 | 4.6077075 | 0.562659  | 2.6681299 | 3.097363  | 2 | 32193669 | 32203955 |
| fam2a              | 2.6132616 | 3.1297966 | 3.2341853 | 3.8506133 | 3.3814099 | 4.7104697 | 2 | 32212087 | 32223025 |
| abcf2a             | 87.836172 | 87.046927 | 89.391524 | 70.287706 | 73.249863 | 69.437548 | 2 | 32223429 | 32231413 |
| SNORD89            | 0         | 0         | 0         | 0         | 0         | 0         | 2 | 32226018 | 32226140 |
| smarcd3a           | 0.6307838 | 1.8802659 | 2.5501597 | 2.7470507 | 2.0568187 | 1.2380706 | 2 | 32232503 | 32276670 |
| tmubl              | 9.7638344 | 11.235167 | 7.4635046 | 19.417623 | 20.028351 | 19.727608 | 2 | 32279058 | 32292819 |
| fastk              | 2.4067381 | 3.8938385 | 3.6579186 | 5.9519825 | 5.5071823 | 5.5052087 | 2 | 32296892 | 32312652 |
| si:dkeyp-73d8.4    | 0         | 0         | 0.8206926 | 0.6514098 | 0         | 1.593744  | 2 | 32322722 | 32325902 |
| si:dkeyp-73d8.5    | 0         | 1.6947133 | 1.3134281 | 0         | 0         | 1.2753058 | 2 | 32328753 | 32329517 |
| si:dkeyp-73d8.6    | 0         | 0         | 0         | 0         | 0         | 0         | 2 | 32339552 | 32342452 |
| si:dkeyp-73d8.8    | 0         | 0         | 0         | 0         | 0         | 0         | 2 | 32354383 | 32355467 |
| si:dkeyp-73d8.9    | 0         | 0         | 0         | 0         | 0         | 0         | 2 | 32360213 | 32361613 |
| puf60a             | 35.620475 | 39.148715 | 36.631012 | 36.711107 | 34.584712 | 37.36415  | 2 | 32371845 | 32389729 |
| SNORA57 (2 32384)  | 0         | 0         | 0         | 0         | 0         | 0         | 2 | 32384199 | 32384334 |
| SNORA57 (2 32385)  | 0         | 0         | 0         | 0         | 0         | 0         | 2 | 32385007 | 32385140 |
| nrbp2              | 3.4080093 | 3.0234322 | 3.6319678 | 4.2777153 | 4.9242407 | 3.7540693 | 2 | 32391243 | 32456410 |
| si:dkeyp-73d8.12   | 0.4980297 | 0         | 0         | 0         | 0         | 0         | 2 | 32419695 | 32437349 |
| klhl18             | 4.3920362 | 2.6593043 | 2.8536929 | 4.5301333 | 4.5748487 | 2.7708645 | 2 | 32461682 | 32474581 |
| si:dkeyp-73d8.13   | 0         | 0         | 0         | 0         | 0         | 0         | 2 | 32476538 | 32478207 |
| bfsp2              | 0         | 0.5016664 | 0         | 0         | 0         | 0         | 2 | 32479005 | 32486826 |
| zgc:136930         | 0         | 0         | 0         | 0         | 0         | 0         | 2 | 32498013 | 32508762 |
| ccr9a              | 0         | 0         | 0         | 0         | 0         | 0         | 2 | 32514748 | 32516958 |
| prpf4ba            | 6.20445   | 9.4685815 | 12.008114 | 13.010873 | 10.522068 | 13.14016  | 2 | 32528356 | 32543983 |
| si:dkey-154p10.3   | 7.5391467 | 4.1416575 | 6.4196927 | 5.0955138 | 3.8520619 | 4.3362512 | 2 | 32544110 | 32552316 |
| pxdc1a             | 0         | 0         | 0         | 0         | 0         | 0         | 2 | 32553506 | 32556769 |
| opn4.1             | 0.4395484 | 0         | 0         | 0         | 0         | 0         | 2 | 32561008 | 32564192 |
| tmem53             | 4.5578513 | 6.2052482 | 4.5560462 | 6.0271308 | 9.2093246 | 4.423807  | 2 | 32564477 | 32568496 |
| rnf220a            | 20.52681  | 17.73317  | 19.599385 | 11.762348 | 11.545254 | 7.658621  | 2 | 32770235 | 32934615 |
| si:ch211-236l6.2   | 0         | 2.4698521 | 2.5522296 | 2.0257856 | 3.2020927 | 1.2390756 | 2 | 32990439 | 32999457 |
| klf4b              | 26.419787 | 28.355422 | 36.488245 | 27.645429 | 18.727809 | 16.10417  | 2 | 33044397 | 33046563 |
| slc6a9             | 2.2183403 | 2.462108  | 3.4074472 | 2.0014033 | 2.778796  | 1.0587347 | 2 | 33064484 | 33140673 |
| ccdc24             | 0.1916443 | 0.5355573 | 0.2767099 | 0.6589003 | 0.1735837 | 0.8060352 | 2 | 33140286 | 33173149 |
| zgc:113531         | 0         | 0.778324  | 0         | 1.4363672 | 0         | 2.9285224 | 2 | 33175185 | 33184246 |
| b4galt2            | 0.841323  | 0.7837031 | 0.404921  | 0.3213987 | 0.5080243 | 0.3931682 | 2 | 33194963 | 33394369 |
| 5S_rRNA (2 33287)  | 0         | 0         | 0         | 0         | 0         | 0         | 2 | 33287797 | 33287914 |
| atp6v0b            | 22.954069 | 23.586336 | 21.184023 | 24.136845 | 21.433887 | 30.190214 | 2 | 33399057 | 33405089 |
| si:dkey-31m5.2     | 0         | 0         | 0         | 0         | 0         | 0         | 2 | 33410040 | 33413629 |
| si:dkey-31m5.3     | 0         | 0         | 0         | 0         | 0         | 0         | 2 | 33415215 | 33417186 |
| si:dkey-31m5.4     | 0         | 0         | 0         | 0         | 0         | 0         | 2 | 33440422 | 33443203 |
| si:dkey-31m5.5     | 0         | 0         | 0.5032028 | 0         | 0.3156656 | 0         | 2 | 33440493 | 33446769 |
| si:dkey-31m5.6     | 0         | 0         | 0         | 0         | 0         | 0         | 2 | 33465384 | 33468165 |
| si:dkey-31m5.7     | 0         | 0         | 0         | 0         | 0         | 0         | 2 | 33468967 | 33475440 |
| si:dkey-31m5.8     | 0         | 0         | 0         | 0         | 0         | 0         | 2 | 33474253 | 33475443 |
| kiss1ra            | 0         | 0         | 0         | 0         | 0         | 0         | 2 | 33514082 | 33539327 |
| mir23a-3           | 0         | 0         | 0         | 0         | 0         | 0         | 2 | 33618310 | 33618387 |
| mir27a             | 0         | 0         | 0         | 0         | 0         | 0         | 2 | 33620200 | 33620330 |
| BX664751.1         | 0         | 0         | 0         | 0         | 0         | 0         | 2 | 33623632 | 33623729 |
| kif2c              | 30.895703 | 27.430688 | 28.810272 | 25.818289 | 22.882817 | 20.754943 | 2 | 33644786 | 33668083 |



|                   |           |           |           |           |           |           |   |          |          |
|-------------------|-----------|-----------|-----------|-----------|-----------|-----------|---|----------|----------|
| ptch2             | 15.101153 | 16.301846 | 22.211692 | 20.218033 | 16.745981 | 13.355709 | 2 | 33685224 | 33711408 |
| eilf2b3           | 26.08624  | 23.808761 | 17.88146  | 29.292105 | 29.833162 | 28.444865 | 2 | 33726830 | 33789927 |
| klhl20            | 6.3082123 | 6.7361083 | 7.1088808 | 6.8768509 | 7.2466748 | 9.7067047 | 2 | 33829975 | 33844754 |
| cenpl             | 3.5319118 | 4.9350309 | 6.3745375 | 2.78282   | 3.5989462 | 3.7137099 | 2 | 33846613 | 33856275 |
| dars2             | 3.0020619 | 2.0196646 | 4.3345944 | 2.4848092 | 2.2659556 | 2.8058552 | 2 | 33852924 | 33891364 |
| si:dkey-21n10.3   | 0         | 0.3508426 | 0         | 0         | 0         | 0         | 2 | 33935518 | 33937106 |
| ram5b             | 0         | 0.1837253 | 0.2847796 | 0.2260386 | 0.1786459 | 0         | 2 | 34098857 | 34201502 |
| astn1             | 1.1805482 | 1.0996956 | 0.2435087 | 0.966403  | 1.1456711 | 2.0097474 | 2 | 34291015 | 34703231 |
| pappa2            | 0.2774811 | 0.5169543 | 0.600971  | 1.0335211 | 0.7539936 | 1.5560741 | 2 | 34707034 | 34823902 |
| rfwd2             | 7.2759636 | 8.4720653 | 13.609479 | 10.802276 | 10.933865 | 11.823468 | 2 | 34837460 | 34858050 |
| 5S_rRNA (2 34959) | 0         | 0         | 0         | 0         | 0         | 0         | 2 | 34959385 | 34959501 |
| tnr               | 0         | 0.1719517 | 0         | 0.5288839 | 0         | 0.1293971 | 2 | 34961597 | 35194948 |
| 5S_rRNA (2 35138) | 0         | 0         | 0         | 0         | 0         | 0         | 2 | 35138792 | 35138906 |
| si:dkey-4i23.7    | 0         | 0.4216236 | 0         | 0.5187269 | 0         | 0         | 2 | 35202989 | 35217751 |
| tnw               | 1.9288198 | 2.9196702 | 2.0887273 | 0.967102  | 0.5459523 | 1.1830595 | 2 | 35230251 | 35287808 |
| mmps14            | 32.050402 | 32.243783 | 31.468149 | 40.404406 | 29.029962 | 33.250797 | 2 | 35312256 | 35315017 |
| cacybp            | 31.777734 | 33.656343 | 38.340583 | 36.917675 | 29.571565 | 32.955711 | 2 | 35316287 | 35322203 |
| plk3              | 16.959442 | 15.045652 | 20.017372 | 28.074689 | 28.527903 | 23.210419 | 2 | 35324470 | 35332623 |
| si:dkey-4i23.5    | 0.8158284 | 0         | 0         | 0         | 0         | 3.4312862 | 2 | 35333454 | 35335126 |
| si:ch73-27j14.1   | 0         | 0         | 0         | 1.6060282 | 0         | 0         | 2 | 35336228 | 35342700 |
| ankrd45           | 1.4158187 | 1.3188531 | 0.4088523 | 0.3245191 | 0.7694349 | 1.5879415 | 2 | 35336380 | 35452609 |
| 5S_rRNA (2 35407) | 0         | 0         | 0         | 0         | 0         | 0         | 2 | 35407362 | 35407476 |
| si:ch73-27j14.2   | 0.4584026 | 0.4270078 | 0.6618749 | 0         | 0         | 1.2853279 | 2 | 35449422 | 35454585 |
| rasal2            | 15.91265  | 17.852917 | 18.279118 | 18.23665  | 18.951949 | 17.378805 | 2 | 35454168 | 35572494 |
| 5S_rRNA (2 35552) | 0         | 0         | 0         | 0         | 0         | 0         | 2 | 35552162 | 35552278 |
| dhx9              | 39.495323 | 44.268814 | 49.698072 | 70.221894 | 68.621158 | 71.283721 | 2 | 35575075 | 35595362 |
| lamc1             | 41.468506 | 49.756264 | 58.447015 | 95.398549 | 79.80745  | 72.111652 | 2 | 35601433 | 35700011 |
| LAMC2             | 0.1189533 | 0.221613  | 0         | 1.090609  | 0.5387156 | 0.8338413 | 2 | 35714224 | 35742453 |
| nmnat2            | 0.5299873 | 1.4810697 | 0.7652341 | 0.3036953 | 0.4800412 | 1.4860463 | 2 | 35747016 | 35761653 |
| smg7              | 13.667357 | 13.902012 | 14.97056  | 24.935474 | 18.426721 | 16.408105 | 2 | 35767100 | 35799340 |
| CT867973.1        | 0         | 0         | 0         | 0         | 0         | 0         | 2 | 35872701 | 35876576 |
| CR352230.1 (2 360 | 0         | 0         | 0         | 0         | 0         | 0         | 2 | 36037394 | 36037848 |
| CR352230.1 (2 360 | 0         | 0         | 0         | 0         | 0         | 0         | 2 | 36045319 | 36045832 |
| CU571384.1        | 0         | 0         | 0         | 0         | 0         | 0         | 2 | 36059920 | 36060430 |
| CU571384.2        | 0         | 0         | 0         | 0         | 0         | 0         | 2 | 36070267 | 36070808 |
| CU693370.1        | 0         | 0         | 0         | 0         | 0         | 0         | 2 | 36120139 | 36120656 |
| BX901889.1 (2 362 | 0         | 0         | 0         | 0         | 0         | 0         | 2 | 36203683 | 36204156 |
| BX901889.4        | 0         | 0         | 0         | 0         | 0         | 0         | 2 | 36210938 | 36211403 |
| BX901889.5 (2 362 | 0         | 0         | 0         | 0         | 0         | 0         | 2 | 36214682 | 36215141 |
| BX901889.1 (2 362 | 0         | 0         | 0         | 0         | 0         | 0         | 2 | 36217469 | 36217946 |
| BX901889.3        | 0         | 0         | 0         | 0         | 0         | 0         | 2 | 36220719 | 36221180 |
| BX901889.2        | 0         | 0         | 0         | 0         | 0         | 0         | 2 | 36229918 | 36230386 |
| BX901889.5 (2 363 | 0         | 0         | 0         | 0         | 0         | 0         | 2 | 36318046 | 36319659 |
| ing5b             | 39.88861  | 35.159071 | 37.776751 | 47.188889 | 46.230214 | 40.288178 | 2 | 36326839 | 36329489 |
| pak2a             | 40.207773 | 44.263877 | 48.756058 | 41.890919 | 40.359984 | 25.378634 | 2 | 36337663 | 36357699 |
| klhl6             | 0         | 0.1747162 | 0         | 0         | 0         | 0         | 2 | 36367284 | 36379989 |
| ccnl1b            | 28.68973  | 20.23237  | 32.999025 | 44.211241 | 37.143831 | 31.132258 | 2 | 36385006 | 36394838 |
| ptx3b             | 0         | 0         | 1.0185769 | 0.8084768 | 1.2779327 | 0         | 2 | 36406835 | 36415977 |
| golim4b           | 1.3129329 | 1.3977298 | 1.6248922 | 4.0841402 | 1.8687454 | 0.2629549 | 2 | 36422155 | 36442122 |
| pdcd10b           | 28.349874 | 33.010333 | 34.470401 | 33.77281  | 37.165777 | 26.148357 | 2 | 36442190 | 36452796 |
| dre-mir-2198      | 0         | 0         | 0         | 0         | 0         | 0         | 2 | 36474482 | 36474591 |
| slitrk3b          | 0         | 0         | 0         | 0         | 0         | 0         | 2 | 36535521 | 36540457 |
| NRD1 (2 of 2)     | 16.867007 | 19.92219  | 18.623498 | 20.46747  | 22.26714  | 20.246723 | 2 | 36549076 | 36575333 |
| FAM163A (2 of 2)  | 0         | 0         | 0         | 0         | 0         | 0         | 2 | 36583306 | 36613716 |
| si:dkey-193b15.7  | 0         | 0         | 0         | 0         | 0         | 0         | 2 | 36615858 | 36619973 |
| si:dkey-193b15.6  | 7.8994695 | 11.719022 | 10.983388 | 9.3884686 | 7.4200218 | 12.305302 | 2 | 36619815 | 36626028 |
| si:dkey-193b15.5  | 0         | 0         | 0         | 0         | 0         | 0         | 2 | 36627969 | 36635114 |
| zgc:153654        | 0         | 0         | 0         | 0         | 0         | 0         | 2 | 36634957 | 36639542 |
| MAP1S (1 of 2)    | 0         | 0.0976621 | 0         | 0.2403089 | 0.1899242 | 0.1469854 | 2 | 36641517 | 36653086 |
| gadd45bb          | 4.7136752 | 6.4399107 | 7.2596753 | 13.325168 | 13.377632 | 16.741288 | 2 | 36660582 | 36662821 |
| gng7              | 2.4326004 | 7.1756607 | 2.9269705 | 2.7878753 | 5.5083785 | 3.4104182 | 2 | 36710857 | 36764738 |
| diras1b           | 0         | 0         | 0         | 0         | 0         | 0         | 2 | 36780137 | 36781749 |
| zgc:101744        | 30.197618 | 26.254166 | 26.160904 | 56.756955 | 66.738354 | 67.737556 | 2 | 36810195 | 36824455 |
| slc1a8b           | 0         | 0         | 0         | 0         | 0.1637645 | 0         | 2 | 36831337 | 36843995 |
| elavl1            | 119.97777 | 118.92338 | 117.14734 | 53.784608 | 51.27351  | 51.855312 | 2 | 36844171 | 36855031 |

|                    |           |           |           |           |           |           |   |          |          |
|--------------------|-----------|-----------|-----------|-----------|-----------|-----------|---|----------|----------|
| pex19              | 12.00328  | 18.243023 | 15.202812 | 19.548466 | 20.981221 | 24.208942 | 2 | 36855114 | 36867405 |
| si:dkey-52k20.13   | 2.3843627 | 2.8556538 | 3.4427155 | 1.5614815 | 1.542614  | 2.8652492 | 2 | 36857495 | 36861256 |
| copa               | 67.202455 | 76.522164 | 76.38341  | 92.913545 | 91.839561 | 98.436274 | 2 | 36897647 | 36926913 |
| APOD (2 of 3)      | 0         | 0         | 0         | 0         | 0.3818214 | 0         | 2 | 36928294 | 36936822 |
| apod               | 0         | 0         | 0         | 0         | 0         | 0         | 2 | 36928632 | 36931230 |
| samd7              | 0         | 0         | 0.3090773 | 0.2453245 | 0.7755527 | 0.3001064 | 2 | 36947844 | 36963370 |
| sec62              | 25.883168 | 23.405514 | 26.881609 | 31.918444 | 33.452158 | 31.19432  | 2 | 36966215 | 36986736 |
| nadkb              | 10.736185 | 8.1041716 | 9.8890038 | 18.456265 | 20.45478  | 17.387361 | 2 | 36988074 | 37002581 |
| gpr160             | 1.3059343 | 1.2164943 | 3.7712049 | 2.993325  | 1.5771502 | 1.8308729 | 2 | 37015921 | 37016992 |
| skila              | 0.4615765 | 2.1498218 | 1.3329152 | 2.9094369 | 2.717503  | 1.6177841 | 2 | 37028246 | 37073405 |
| prkci              | 29.520982 | 26.348576 | 27.643524 | 34.11556  | 33.67537  | 31.689899 | 2 | 37086384 | 37122433 |
| si:dkey-31b10.2    | 0         | 0         | 0.9092964 | 0         | 0         | 0         | 2 | 37126184 | 37129990 |
| phc3               | 0         | 0         | 0.4334439 | 0.1720191 | 0         | 0         | 2 | 37145094 | 37168609 |
| MUM1               | 2.2569624 | 4.3048919 | 4.1898417 | 4.6804886 | 4.0885311 | 2.1094534 | 2 | 37170127 | 37182556 |
| si:dkey-57k2.7     | 3.7299153 | 0         | 2.3935652 | 4.7496217 | 1.8768927 | 2.324092  | 2 | 37181473 | 37183295 |
| si:dkey-57k2.6     | 0         | 0         | 0         | 0         | 0         | 0         | 2 | 37184249 | 37186350 |
| dapk3              | 5.4373649 | 8.0443709 | 9.2363072 | 18.327875 | 13.90573  | 17.039625 | 2 | 37190409 | 37199251 |
| sppl2              | 7.2019535 | 5.1840038 | 7.090024  | 4.6896475 | 7.2645163 | 3.6715926 | 2 | 37201502 | 37223842 |
| GIN1               | 0         | 0         | 0         | 0         | 0         | 0         | 2 | 37206978 | 37210544 |
| arhgef18a          | 6.377456  | 6.9649364 | 7.4618437 | 5.5446574 | 6.4735994 | 7.8618819 | 2 | 37225077 | 37258737 |
| 5S_rRNA (2 37229)  | 0         | 0         | 0         | 0         | 0         | 0         | 2 | 37229108 | 37229223 |
| insra              | 4.6372879 | 4.9842605 | 4.4294313 | 5.8868878 | 6.5911904 | 5.9011897 | 2 | 37265784 | 37353729 |
| hiat1a             | 5.5853243 | 5.3328704 | 6.4515965 | 5.9209677 | 7.3354943 | 3.9152118 | 2 | 37376911 | 37405474 |
| myo9b              | 2.1000644 | 2.0017305 | 2.9617082 | 3.5262027 | 3.8927796 | 4.0397365 | 2 | 37405755 | 37465784 |
| MYADM (1 of 2)     | 0         | 0.4911796 | 0.7613431 | 0         | 0         | 0         | 2 | 37475050 | 37475934 |
| itr66              | 0         | 0         | 0         | 0         | 0         | 0         | 2 | 37483787 | 37490982 |
| NFATC4             | 2.3350655 | 2.0078243 | 2.5934897 | 0.6175605 | 0.6507717 | 0.2518214 | 2 | 37496754 | 37517505 |
| si:dkeyp-66d1.2    | 0         | 0         | 0         | 0         | 0         | 0         | 2 | 37528039 | 37532476 |
| sdr39u1            | 7.4334241 | 9.4888949 | 2.7826078 | 4.4172883 | 5.9847964 | 3.4737977 | 2 | 37536607 | 37561848 |
| RNaseP_nuc (2 375) | 0         | 0         | 0         | 0         | 0         | 0         | 2 | 37551528 | 37551830 |
| mettl17            | 9.1112381 | 7.3802032 | 8.8656396 | 7.2639376 | 7.3555713 | 8.886002  | 2 | 37552359 | 37575883 |
| rpph1              | 0         | 0         | 0         | 0         | 0         | 4.3183624 | 2 | 37565147 | 37565449 |
| RNaseP_nuc (2 375) | 0         | 0         | 0         | 0         | 0         | 0         | 2 | 37575030 | 37575331 |
| parp2              | 32.837947 | 35.549336 | 32.548936 | 15.867241 | 17.202875 | 18.415048 | 2 | 37575232 | 37585260 |
| si:ch211-284o19.8  | 0         | 0         | 0         | 0         | 0         | 0         | 2 | 37589535 | 37603076 |
| zgc:66427          | 9.9080699 | 11.49904  | 15.009562 | 15.450405 | 12.652334 | 9.3364107 | 2 | 37605291 | 37613058 |
| cbn13              | 4.8864277 | 5.3103975 | 5.2915336 | 5.1334044 | 3.6882744 | 0         | 2 | 37613182 | 37616715 |
| hbl4               | 2.9375692 | 7.0364132 | 7.8770251 | 8.6569544 | 8.3622998 | 5.8833804 | 2 | 37618223 | 37621667 |
| hbl3               | 0.8871746 | 0.4132072 | 0         | 0.5083721 | 0.4017835 | 0         | 2 | 37625688 | 37627563 |
| hbl2               | 0         | 0.4911796 | 0.7613431 | 0.6043022 | 0         | 1.4784902 | 2 | 37631017 | 37632321 |
| hbl1               | 8.7011022 | 4.6924766 | 7.934704  | 7.3476974 | 5.8071319 | 3.8521996 | 2 | 37633260 | 37635376 |
| TEP1               | 5.2945284 | 10.137836 | 7.0075714 | 17.866242 | 20.114753 | 16.082599 | 2 | 37635490 | 37657771 |
| cbn10              | 8.0181074 | 4.4813811 | 2.3154248 | 7.3513045 | 5.8099827 | 2.2482196 | 2 | 37658833 | 37659476 |
| cbn14              | 0         | 0         | 0         | 0         | 0         | 0         | 2 | 37662058 | 37663345 |
| cbn9               | 1.140963  | 0         | 0         | 0         | 0         | 0         | 2 | 37666026 | 37670126 |
| apoll              | 0         | 0.3347662 | 0         | 0.4118655 | 0.4882667 | 0         | 2 | 37670743 | 37677483 |
| APOLD1 (3 of 4)    | 0.8995737 | 0.6284732 | 0.9741522 | 0         | 0.2036994 | 0.3152925 | 2 | 37679785 | 37693261 |
| pcp4l1             | 1.8444816 | 1.1454387 | 0         | 0         | 2.2275428 | 0         | 2 | 37697938 | 37703032 |
| DCAF8              | 1.6774042 | 2.6042054 | 3.2292768 | 3.7166103 | 2.8360735 | 1.4109962 | 2 | 37704438 | 37725422 |
| hnmpe              | 100.49925 | 69.175697 | 76.443889 | 59.60203  | 65.777929 | 66.999652 | 2 | 37727933 | 37736951 |
| cbn5               | 0         | 0         | 0.6854411 | 2.7202818 | 1.289958  | 0         | 2 | 37736781 | 37738032 |
| casq1a             | 0         | 0         | 0         | 0         | 0         | 0         | 2 | 37742615 | 37756145 |
| si:rp71-1g18.1     | 15.871263 | 11.538952 | 14.532148 | 11.756446 | 12.973058 | 12.482234 | 2 | 37758249 | 37768934 |
| tox4               | 11.954131 | 15.672079 | 13.85081  | 17.928395 | 20.719424 | 19.242115 | 2 | 37770447 | 37783417 |
| chd8               | 13.492262 | 14.541734 | 16.663589 | 13.737586 | 14.341703 | 13.913175 | 2 | 37790283 | 37818491 |
| cbn12              | 0.8430964 | 0.3926775 | 0         | 0         | 0         | 0.5909954 | 2 | 37824173 | 37828415 |
| trim110            | 0         | 0         | 0         | 0         | 0         | 0         | 2 | 37830744 | 37844755 |
| SALL2              | 0.9643269 | 0.5239982 | 1.0442737 | 1.2893583 | 0.3639368 | 0.3379879 | 2 | 37850519 | 37859580 |
| mmp14b             | 5.3206676 | 6.1224503 | 7.6823651 | 5.1412292 | 3.968791  | 1.9014117 | 2 | 37864076 | 37886399 |
| acin1a             | 26.429622 | 25.488452 | 45.254459 | 44.899875 | 35.542205 | 27.637462 | 2 | 37900578 | 37928232 |
| C2H14orf119        | 22.627889 | 13.821748 | 16.068091 | 29.758759 | 14.783589 | 23.402572 | 2 | 37928185 | 37932766 |
| si:ch211-14a17.10  | 0         | 0         | 0         | 0         | 0         | 0.5657814 | 2 | 37936319 | 37964030 |
| dhrs1              | 9.7582582 | 7.1420966 | 7.0448399 | 13.180466 | 7.2603089 | 6.8403634 | 2 | 37964506 | 37972433 |
| homez              | 29.096981 | 30.389564 | 36.283374 | 51.535527 | 46.121026 | 51.300187 | 2 | 37974150 | 37978416 |
| C2H14orf164        | 0         | 0         | 0         | 1.2643201 | 0         | 0         | 2 | 37980033 | 37984837 |

|                      |           |           |           |           |           |           |   |          |          |
|----------------------|-----------|-----------|-----------|-----------|-----------|-----------|---|----------|----------|
| si:ch211-14a17.7     | 0         | 0.744339  | 0.5768738 | 2.2894153 | 1.8094017 | 2.2405202 | 2 | 37985405 | 37987509 |
| si:ch211-14a17.6     | 0         | 0.2959115 | 0         | 0.7281244 | 0         | 0.8907174 | 2 | 37988172 | 37990782 |
| ap1g2                | 5.8027554 | 6.451535  | 5.6757163 | 6.2211852 | 5.2559019 | 2.8867031 | 2 | 37992902 | 38014304 |
| SLC7A8 (2 of 2)      | 0         | 0         | 0         | 1.4204712 | 0         | 0.4344169 | 2 | 38020758 | 38039853 |
| prmt5                | 28.339303 | 32.206071 | 37.372081 | 30.746013 | 27.89321  | 37.611712 | 2 | 38045045 | 38065775 |
| PSMB11 (1 of 2)      | 0         | 0         | 0         | 0         | 0         | 0         | 2 | 38073355 | 38074482 |
| psmb5                | 146.63206 | 180.79015 | 163.29586 | 245.73337 | 257.22499 | 272.09645 | 2 | 38076030 | 38095333 |
| FP015916.1           | 0         | 0         | 0         | 0         | 0         | 0         | 2 | 38081665 | 38081773 |
| CDH24 (2 of 2)       | 0         | 0         | 0.1327662 | 0.1053808 | 0.083286  | 0.1289127 | 2 | 38257744 | 38413397 |
| 5S_rRNA (2 38342)    | 0         | 0         | 0         | 0         | 0         | 0         | 2 | 38342118 | 38342235 |
| gig2q                | 0         | 0         | 0         | 0         | 0         | 0         | 2 | 38425302 | 38426037 |
| CABZ01011032.1       | 0         | 0         | 0         | 0         | 0         | 0         | 2 | 38435909 | 38442464 |
| LRRC16B              | 0         | 0.0555804 | 0.0861512 | 0         | 0         | 0         | 2 | 38446369 | 38594873 |
| si:ch211-119o8.4     | 0         | 0         | 0         | 0         | 0         | 0         | 2 | 38596827 | 38613597 |
| rem2                 | 0         | 0.2770516 | 0         | 0.3408588 | 0         | 0         | 2 | 38629171 | 38681494 |
| si:ch211-119o8.6     | 0         | 0.7361456 | 0         | 0         | 0         | 0.8309465 | 2 | 38689685 | 38696509 |
| copb2                | 68.651747 | 73.070875 | 67.314599 | 78.168083 | 85.462435 | 86.263767 | 2 | 38701553 | 38719326 |
| rbp2b                | 2.9287898 | 7.5783467 | 6.5781315 | 3.3565318 | 5.6003128 | 4.1060579 | 2 | 38720262 | 38740708 |
| RBP1                 | 0         | 0         | 0         | 0         | 0         | 0         | 2 | 38725478 | 38732248 |
| rbp1b                | 0         | 0         | 0         | 0.552487  | 0         | 0.6758594 | 2 | 38732533 | 38740800 |
| si:ch211-119o8.8     | 0         | 0         | 0         | 0         | 1.5890084 | 0         | 2 | 38740928 | 38749816 |
| NMNAT3               | 0.7142661 | 0.8871305 | 1.3750788 | 0.8185828 | 2.5878137 | 1.3351671 | 2 | 38766950 | 38794482 |
| clstn2               | 0         | 0.2978376 | 0         | 0         | 0.4344052 | 0         | 2 | 38812535 | 39253455 |
| cbln7                | 1.0286271 | 0         | 0         | 0         | 0         | 0         | 2 | 39253572 | 39262839 |
| BX322588.1           | 0         | 0.6383171 | 0         | 0         | 0         | 0         | 2 | 39264719 | 39267386 |
| spsb4a               | 16.311004 | 13.896866 | 15.221993 | 12.994042 | 13.873005 | 17.011145 | 2 | 39288262 | 39380025 |
| si:dkeyp-55c8.4      | 0         | 0.6062677 | 0.9397331 | 0         | 0         | 0         | 2 | 39314517 | 39316660 |
| zgc:136870           | 0.3220523 | 1.799975  | 1.3950075 | 1.4763489 | 0         | 1.8060232 | 2 | 39323147 | 39325299 |
| slc25a36a            | 0         | 0.3455437 | 1.6068091 | 1.4879379 | 0.3359907 | 0.9101    | 2 | 39435480 | 39463255 |
| si:ch211-16k18.1     | 0         | 0         | 0         | 0         | 0         | 0         | 2 | 39631157 | 39730818 |
| 5S_rRNA (2 39761)    | 0         | 0         | 0         | 0         | 0         | 0         | 2 | 39761095 | 39761212 |
| epha4a               | 22.419818 | 22.382377 | 25.26878  | 31.00647  | 26.990273 | 22.546001 | 2 | 39772017 | 39840214 |
| si:ch211-122i24.4 (2 | 0         | 0         | 0         | 0         | 0         | 0         | 2 | 39903198 | 39903976 |
| si:ch211-122i24.6    | 0         | 0         | 0         | 0         | 0         | 0         | 2 | 39969460 | 39976808 |
| si:ch211-122i24.5    | 0         | 0         | 0         | 0         | 0         | 0         | 2 | 39979678 | 39982185 |
| si:ch211-122i24.4 (2 | 0         | 0         | 0         | 0         | 0         | 0         | 2 | 39984417 | 39985381 |
| si:ch211-122i24.3    | 0         | 0         | 0         | 0         | 0         | 0         | 2 | 39998824 | 39999929 |
| si:ch211-122i24.2    | 0         | 0         | 0         | 0         | 0         | 0         | 2 | 40009077 | 40009724 |
| epha4b               | 2.8515359 | 4.2499869 | 6.175881  | 0.653599  | 1.8079644 | 0         | 2 | 40081937 | 40266727 |
| 5S_rRNA (2 40347)    | 0         | 0         | 0         | 0         | 0         | 0         | 2 | 40347951 | 40348070 |
| uggt1                | 3.963651  | 4.1844833 | 5.9137732 | 4.9210761 | 4.2483031 | 3.8898273 | 2 | 40583387 | 40642628 |
| HS6ST1 (1 of 3)      | 0         | 3.6224497 | 0         | 1.4855761 | 0         | 0         | 2 | 40654960 | 40655805 |
| si:dkeyp-82d1.2      | 0         | 0         | 0         | 0         | 0         | 0         | 2 | 40814872 | 40816884 |
| 5S_rRNA (2 40867)    | 0         | 0         | 0         | 0         | 0         | 0         | 2 | 40867655 | 40867770 |
| hs6st1a              | 0.6331803 | 2.3592617 | 4.5711575 | 3.6282728 | 1.1470183 | 0         | 2 | 40954856 | 40955592 |
| 5S_rRNA (2 41048)    | 0         | 0         | 0         | 0         | 0         | 0         | 2 | 41048843 | 41048959 |
| 5S_rRNA (2 41306)    | 0         | 0         | 0         | 0         | 0         | 0         | 2 | 41306249 | 41306365 |
| SSBP4 (2 of 2)       | 3.2077222 | 2.273504  | 4.0274274 | 3.0368621 | 2.4632955 | 2.2485555 | 2 | 41487546 | 41530151 |
| znf622               | 28.24835  | 20.719446 | 22.802189 | 23.451993 | 30.018475 | 31.495435 | 2 | 41536204 | 41544585 |
| d2hgdh               | 2.2912628 | 3.3200849 | 5.5138184 | 4.0847265 | 3.9200743 | 1.4276746 | 2 | 41544790 | 41561387 |
| acvr11               | 16.246309 | 19.11618  | 20.062419 | 23.886268 | 16.74828  | 23.076434 | 2 | 41563236 | 41583420 |
| otomp                | 1.7974149 | 2.0928934 | 1.9464283 | 0         | 0         | 0         | 2 | 41589199 | 41603527 |
| efr3a (2 41686644.4  | 0.6714444 | 0.4690942 | 1.45422   | 1.9237676 | 0.7602091 | 1.8826817 | 2 | 41686645 | 41714376 |
| CR848728.2           | 17.83845  | 19.773923 | 22.408108 | 9.4041057 | 10.825424 | 5.2518616 | 2 | 41720884 | 41787554 |
| 5S_rRNA (2 41789)    | 0         | 0         | 0         | 0         | 0         | 0         | 2 | 41789553 | 41789669 |
| 5S_rRNA (2 41835)    | 0         | 0         | 0         | 0         | 0         | 0         | 2 | 41835429 | 41835546 |
| KCNQ3 (2 of 2)       | 0         | 0         | 0         | 0         | 0         | 0         | 2 | 41838136 | 41842617 |
| CABZ01046038.1       | 0         | 0         | 0         | 0         | 0         | 0         | 2 | 41845658 | 41874524 |
| keap1a               | 5.3694481 | 2.7282048 | 3.523999  | 3.5430058 | 4.5686763 | 4.5622866 | 2 | 41936143 | 41962158 |
| crlf1a               | 2.9381909 | 4.0249442 | 4.7414754 | 1.9807682 | 1.7220143 | 3.1500054 | 2 | 41977713 | 42021750 |
| ODF3L2 (1 of 2)      | 4.4137509 | 1.8688477 | 4.6348314 | 3.6788128 | 3.9977976 | 2.8126909 | 2 | 42027825 | 42035137 |
| ebi3                 | 0.4504381 | 0         | 1.3007502 | 8.2595738 | 6.5278184 | 0.631498  | 2 | 42037721 | 42043784 |
| si:dkey-97a13.5      | 0         | 0         | 0         | 1.1354722 | 0         | 0         | 2 | 42047093 | 42048014 |
| HELZ2 (2 of 2)       | 0.1086631 | 0         | 0.1568957 | 0.1245331 | 0.0984227 | 0.2285127 | 2 | 42050304 | 42076835 |
| ebp2                 | 0.5794543 | 0.359846  | 1.3944301 | 6.1980991 | 4.0238218 | 4.0618702 | 2 | 42106335 | 42118400 |

|                      |           |           |           |           |           |           |   |          |          |
|----------------------|-----------|-----------|-----------|-----------|-----------|-----------|---|----------|----------|
| gbpl                 | 10.246586 | 10.030155 | 9.5288304 | 12.340178 | 13.528157 | 11.200099 | 2 | 42122033 | 42136425 |
| si:dkey-97a13.9      | 4.6346751 | 3.3728582 | 4.6006671 | 4.6476125 | 3.4107953 | 2.6396694 | 2 | 42140154 | 42172676 |
| vcpipl               | 1.6494019 | 1.4182511 | 1.2823601 | 0.8724427 | 1.1492013 | 1.4230166 | 2 | 42173798 | 42184631 |
| si:dkey-97a13.12     | 0         | 0         | 0         | 0         | 0         | 0         | 2 | 42189574 | 42193044 |
| adhfel               | 10.033169 | 7.6845088 | 5.7946465 | 8.4322238 | 4.8467414 | 9.3774281 | 2 | 42196605 | 42212732 |
| crha                 | 0         | 0         | 0         | 0         | 0         | 0         | 2 | 42213621 | 42215154 |
| trim55a              | 3.0124368 | 1.7857147 | 1.5816634 | 0.9415623 | 1.4882966 | 1.9196945 | 2 | 42215428 | 42229832 |
| cyp7c1               | 2.4603894 | 2.8011914 | 3.5524883 | 3.7596303 | 6.437951  | 7.2820188 | 2 | 42236837 | 42253253 |
| slc39a6              | 17.642868 | 19.392774 | 17.577094 | 20.421757 | 15.980198 | 17.808959 | 2 | 42257404 | 42275102 |
| lmeff1a              | 0         | 0.3027117 | 1.4076364 | 0.7448571 | 1.7660567 | 0         | 2 | 42278040 | 42288236 |
| murca                | 2.8872628 | 1.3447609 | 1.0422098 | 0.4136175 | 0         | 0.5059798 | 2 | 42292710 | 42299718 |
| ift57                | 13.879328 | 11.49224  | 10.687989 | 7.7764461 | 10.895158 | 11.242584 | 2 | 42301508 | 42311644 |
| TMEM71               | 1.03242   | 1.6349109 | 1.639751  | 0.8282416 | 1.4961991 | 0.2894831 | 2 | 42314066 | 42328692 |
| apom                 | 75.093723 | 54.961306 | 57.310756 | 75.610702 | 71.903545 | 78.207032 | 2 | 42329859 | 42335679 |
| fr02                 | 1.0463091 | 0.8354144 | 0.8632782 | 0.5139085 | 0.1353864 | 0         | 2 | 42337236 | 42343872 |
| fr03                 | 0         | 0         | 0         | 0         | 0         | 0         | 2 | 42348696 | 42351372 |
| fr04                 | 0         | 0         | 0         | 0         | 0         | 0         | 2 | 42361094 | 42362671 |
| fr05                 | 0         | 0         | 0         | 0         | 0         | 0         | 2 | 42372948 | 42374493 |
| fr06                 | 0         | 0         | 0         | 0         | 0         | 0         | 2 | 42396062 | 42405281 |
| fr07                 | 0         | 0         | 0.4143841 | 0         | 0         | 0         | 2 | 42410874 | 42415336 |
| fr08                 | 0         | 0         | 0         | 0         | 0         | 0         | 2 | 42419150 | 42422784 |
| fr09                 | 0         | 0         | 0         | 0.6161376 | 0         | 0         | 2 | 42431946 | 42434347 |
| fr10                 | 0         | 0         | 0         | 0         | 0         | 0         | 2 | 42445422 | 42446689 |
| si:dkey-716.3        | 2.4537248 | 2.077887  | 3.8649442 | 1.5338645 | 2.4245291 | 0.9381911 | 2 | 42455761 | 42461532 |
| gtpbp4               | 142.93009 | 148.83744 | 128.23165 | 130.40758 | 136.82213 | 150.35661 | 2 | 42462491 | 42476393 |
| si:dkey-716.4        | 0.3021391 | 0.8443392 | 1.0906258 | 0.8656643 | 1.2314944 | 0.4235882 | 2 | 42486295 | 42517020 |
| esyt2a               | 1.8802902 | 3.5030283 | 2.7148992 | 8.5216565 | 5.341513  | 4.9127304 | 2 | 42520959 | 42593563 |
| 5S_rRNA (2 425248)   | 0         | 0         | 0         | 0         | 0         | 0         | 2 | 42524802 | 42524917 |
| si:dkey-716.7        | 0.9911232 | 0.5385589 | 0.4770185 | 0.8519056 | 0.2992398 | 0.9263461 | 2 | 42596779 | 42680096 |
| RNaseP_nuc (2 4268)  | 0         | 0         | 0         | 0         | 0         | 0         | 2 | 42687856 | 42688153 |
| march11              | 0         | 0         | 0         | 0         | 0         | 0         | 2 | 42693690 | 42701231 |
| myo10                | 6.7726288 | 5.757536  | 6.7407343 | 4.5967665 | 4.4072202 | 4.148293  | 2 | 42705883 | 42806051 |
| fr11                 | 0         | 0         | 0         | 0         | 0         | 0         | 2 | 42809792 | 42816259 |
| fr12                 | 0         | 0         | 0         | 0         | 0         | 0         | 2 | 42817113 | 42819940 |
| baspl                | 1.9047096 | 0.3548522 | 1.100063  | 0.8731549 | 2.070251  | 2.1362674 | 2 | 42825522 | 42849775 |
| adcyc8               | 0         | 0         | 0         | 0.3923752 | 0.1550536 | 0         | 2 | 42877342 | 42966373 |
| efr3a (2 42973772.4) | 0.5847793 | 1.9065525 | 1.0554333 | 0.8377309 | 1.1917563 | 1.0247993 | 2 | 42973773 | 43027438 |
| oc90                 | 17.038072 | 17.130797 | 23.624579 | 10.383105 | 7.2262817 | 8.3414093 | 2 | 43043670 | 43061471 |
| 5S_rRNA (2 430633)   | 0         | 0         | 0         | 0         | 0         | 0         | 2 | 43063346 | 43063462 |
| HHLA1                | 0         | 0         | 0         | 0         | 0         | 0         | 2 | 43081596 | 43082550 |
| 5S_rRNA (2 430999)   | 0         | 0         | 0         | 0         | 0         | 0         | 2 | 43099920 | 43100037 |
| kcnq3                | 0         | 0         | 0         | 0.1452886 | 0         | 0         | 2 | 43102630 | 43184873 |
| lrrc6                | 1.0410571 | 1.2121973 | 2.2547304 | 0.2982752 | 1.1786844 | 0         | 2 | 43199355 | 43225067 |
| fr13                 | 0         | 0         | 0         | 0         | 0         | 0         | 2 | 43229480 | 43232048 |
| fr14                 | 0.1874112 | 0.5237277 | 0.5411957 | 1.5034746 | 0.339499  | 0.2627437 | 2 | 43232265 | 43236818 |
| fr15                 | 2.3885034 | 1.6686909 | 0.8621735 | 0.6843345 | 0.5408525 | 0         | 2 | 43245068 | 43252476 |
| CREM (1 of 2)        | 0.2584863 | 0.4013054 | 0.9952564 | 1.5799333 | 0.6243371 | 1.3287575 | 2 | 43256633 | 43297713 |
| pard3                | 5.0894929 | 7.0296505 | 6.9684794 | 8.8497653 | 7.3121877 | 5.6590198 | 2 | 43306095 | 43490366 |
| 5S_rRNA (2 433233)   | 0         | 0         | 0         | 0         | 0         | 0         | 2 | 43323563 | 43323677 |
| nrip1b               | 4.3278381 | 4.1190759 | 4.4828678 | 2.91125   | 3.6643303 | 3.1656382 | 2 | 43570359 | 43633838 |
| itgb1b.2             | 0.8222975 | 0         | 0         | 0.235598  | 0.186201  | 0         | 2 | 43670284 | 43684517 |
| itgb1b.1             | 4.5750377 | 5.9008231 | 5.3354302 | 2.8232668 | 3.8251244 | 4.440488  | 2 | 43687135 | 43704034 |
| EPC1 (1 of 2)        | 7.5327498 | 7.952432  | 7.2508863 | 6.0430215 | 4.0937166 | 5.1043113 | 2 | 43717977 | 43737245 |
| CU693495.1           | 0.3716877 | 0         | 0         | 0         | 0.1683298 | 0.2605464 | 2 | 43739588 | 43750519 |
| CABZ01071036.1       | 0         | 0         | 0         | 1.048642  | 1.6575539 | 0         | 2 | 43757513 | 43758022 |
| ki5ba                | 37.16173  | 33.576231 | 39.143072 | 45.265466 | 48.558106 | 49.964186 | 2 | 43765423 | 43801060 |
| fr16                 | 0         | 0         | 0         | 0.3112965 | 0         | 0         | 2 | 43804075 | 43806647 |
| arhgap12a            | 3.4226003 | 3.5180089 | 2.7265093 | 4.4634912 | 4.2759357 | 4.6329017 | 2 | 43810722 | 43858719 |
| zeb1a                | 3.7017066 | 2.4471001 | 5.8620299 | 1.779042  | 2.8120733 | 0.8370418 | 2 | 43868731 | 43913416 |
| nhrb5                | 0         | 0         | 0         | 0         | 0         | 0         | 2 | 43926076 | 43934272 |
| gbp3                 | 3.8519272 | 3.9867989 | 3.9137828 | 1.961996  | 2.842824  | 2.2001073 | 2 | 43955869 | 43980375 |
| sr:ch211-195h23.3    | 4.5900379 | 5.4633668 | 8.4683815 | 0.2922445 | 0         | 1.0725113 | 2 | 43981962 | 44016911 |
| sr:ch211-195h23.4    | 0         | 0         | 0         | 0         | 0         | 0         | 2 | 44002426 | 44004096 |
| kirrelb              | 1.651872  | 1.2090098 | 1.36291   | 0.1352231 | 0.6412282 | 0         | 2 | 44023127 | 44100277 |
| cadm3                | 0.9024844 | 0.8406756 | 0.902127  | 1.2729721 | 1.2575907 | 0.5839618 | 2 | 44105656 | 44245114 |

|                   |           |           |           |           |           |           |   |          |          |
|-------------------|-----------|-----------|-----------|-----------|-----------|-----------|---|----------|----------|
| sdhc              | 56.522995 | 58.970112 | 62.67801  | 63.223356 | 52.83453  | 57.055107 | 2 | 44254153 | 44261341 |
| atpla2a           | 3.702654  | 3.0040279 | 4.4838761 | 0.4106532 | 0.5409217 | 0         | 2 | 44264576 | 44317038 |
| mpz               | 7.0906568 | 6.1922218 | 7.465211  | 0.5078893 | 0.8028039 | 0.8284038 | 2 | 44320983 | 44344410 |
| LIG1              | 44.555549 | 41.992341 | 58.845341 | 37.245784 | 34.065735 | 26.639603 | 2 | 44362777 | 44405822 |
| zgc:152670        | 0.3229438 | 0.6016526 | 0.2331448 | 0.5551634 | 0         | 0         | 2 | 44409991 | 44424444 |
| ETV3L             | 0.5782576 | 0         | 0.8349301 | 0         | 0         | 0         | 2 | 44427193 | 44432915 |
| TMEM55B (1 of 2)  | 2.2566615 | 0.8850984 | 2.4008757 | 2.1778871 | 1.6136787 | 1.8316495 | 2 | 44444676 | 44460112 |
| pihl3             | 3.8393361 | 5.2020221 | 4.5356002 | 4.8000665 | 3.161378  | 5.382611  | 2 | 44462271 | 44467626 |
| KCNAB1 (1 of 3)   | 1.6067767 | 0.8552759 | 2.3199805 | 1.0522526 | 2.4948917 | 2.252643  | 2 | 44488199 | 44572252 |
| bask              | 2.9086825 | 5.4189492 | 4.382365  | 2.4638824 | 3.092753  | 2.1275834 | 2 | 44574233 | 44606763 |
| MTERFD2           | 12.467851 | 10.507869 | 12.001324 | 17.010414 | 8.6040965 | 16.647122 | 2 | 44612299 | 44618774 |
| BX323035.1 (2 446 | 0         | 0         | 0         | 0         | 0         | 0         | 2 | 44623829 | 44625766 |
| 5S_rRNA (2 44625  | 0         | 0         | 0         | 0         | 0         | 0         | 2 | 44625879 | 44625995 |
| BX323035.1 (2 446 | 0         | 0         | 0         | 0         | 0         | 0         | 2 | 44627715 | 44628827 |
| klhl24            | 1.030596  | 0.5760079 | 1.7856589 | 1.6535565 | 0.1866945 | 0.2889717 | 2 | 44632701 | 44665956 |
| YEATS2            | 4.3920362 | 3.5497501 | 4.569639  | 4.4413072 | 3.7441217 | 3.9842496 | 2 | 44677192 | 44756745 |
| MAP6D1            | 0         | 0         | 0         | 0         | 0         | 0         | 2 | 44759069 | 44782214 |
| acsm3             | 0.738766  | 1.3763397 | 1.0666838 | 1.8344317 | 1.6728611 | 2.0714466 | 2 | 44787051 | 44808224 |
| ncapd2            | 37.344653 | 49.449314 | 47.830673 | 40.794392 | 37.086672 | 47.307774 | 2 | 44811404 | 44839093 |
| snoU85 (2 4482458 | 0         | 0         | 0         | 0         | 0         | 0         | 2 | 44824583 | 44824876 |
| snoU85 (2 4483577 | 0         | 0         | 0         | 0         | 0         | 0         | 2 | 44835776 | 44836096 |
| si:ch211-224b1.4  | 6.3367157 | 5.4811073 | 13.070584 | 5.7059956 | 1.639869  | 6.3456052 | 2 | 44842735 | 44984354 |
| si:ch211-224b1.5  | 4.1480342 | 0.6439911 | 1.9964107 | 0.7923073 | 1.8785611 | 0         | 2 | 44985300 | 44986177 |
| camk2n1a          | 1.5372127 | 1.4319331 | 0.634154  | 2.2650667 | 0.9945323 | 0.9236215 | 2 | 45004897 | 45007595 |
| mull1a            | 0.9625036 | 0.5977229 | 1.3897324 | 0.6434603 | 0.9444467 | 0.899597  | 2 | 45022377 | 45033052 |
| alg3              | 9.6322929 | 8.9726028 | 13.31598  | 8.2205794 | 7.239514  | 7.4703686 | 2 | 45034221 | 45042845 |
| vwa5b2            | 0.2486169 | 0.1157949 | 0         | 0.5698534 | 0.2251871 | 0         | 2 | 45046044 | 45083205 |
| PRSS56            | 0         | 0         | 0         | 0         | 2.3560549 | 0         | 2 | 45110791 | 45119741 |
| si:dkeyp-76d14.2  | 0.6554127 | 0         | 0         | 0         | 0.5936464 | 2.7565951 | 2 | 45129867 | 45131943 |
| 5S_rRNA (2 451352 | 0         | 0         | 0         | 0         | 0         | 0         | 2 | 45135295 | 45135411 |
| chmg              | 4.6004076 | 8.0350087 | 13.284803 | 5.272285  | 1.5625739 | 2.4186022 | 2 | 45143065 | 45158422 |
| eif4e2            | 5.4395234 | 6.9337688 | 6.6138759 | 13.452211 | 12.446908 | 12.041078 | 2 | 45178320 | 45197119 |
| capn10            | 2.847493  | 1.2482239 | 1.4510882 | 0.5758874 | 1.3654294 | 0.7044852 | 2 | 45200971 | 45216123 |
| CU929150.1        | 0         | 0         | 0         | 0         | 0         | 0         | 2 | 45221499 | 45222824 |
| zgc:195195        | 0         | 0         | 0         | 0         | 0         | 0         | 2 | 45241704 | 45243634 |
| mir181b-1         | 0         | 0         | 0         | 0         | 0         | 0         | 2 | 45252630 | 45252738 |
| CU571393.1        | 0         | 0         | 0         | 0         | 0         | 0         | 2 | 45255036 | 45255102 |
| CAMSAP2 (1 of 2)  | 0.5523838 | 1.6465681 | 1.9141722 | 0.8862812 | 0.1000654 | 1.5488445 | 2 | 45346799 | 45431744 |
| 5S_rRNA (2 453859 | 0         | 0         | 0         | 0         | 0         | 0         | 2 | 45385914 | 45386046 |
| si:ch211-141h20.6 | 0         | 0         | 0         | 0         | 0         | 0         | 2 | 45387428 | 45392266 |
| wdr47a            | 0.497423  | 0.1985811 | 1.3338285 | 0.6515089 | 0.6436367 | 0.1992483 | 2 | 45437773 | 45478472 |
| si:ch211-66k16.20 | 0.271074  | 0.3787633 | 0.1956981 | 0.4659954 | 0.8593476 | 1.1401079 | 2 | 45487179 | 45503631 |
| si:ch211-66k16.27 | 0         | 0         | 0         | 0         | 0         | 0         | 2 | 45496903 | 45503631 |
| si:ch211-66k16.2  | 0         | 0         | 0         | 0         | 0         | 0         | 2 | 45509755 | 45512232 |
| si:ch211-66k16.24 | 0         | 0         | 0         | 0         | 0         | 0         | 2 | 45516473 | 45517314 |
| si:ch211-66k16.28 | 0.1186207 | 0.1104967 | 0.1712732 | 0         | 0.1074419 | 0         | 2 | 45535181 | 45543193 |
| gpsm2             | 4.7350724 | 6.8483162 | 6.4770067 | 7.2830915 | 4.6274302 | 5.240843  | 2 | 45546372 | 45566044 |
| si:dkeyp-51f11.3  | 0         | 0         | 0.4291647 | 0         | 0         | 0.4167082 | 2 | 45566799 | 45593275 |
| rndc7             | 0         | 0         | 0         | 0         | 0         | 0         | 2 | 45604230 | 45623042 |
| FNDC7 (4 of 4)    | 0         | 0         | 0         | 0         | 0         | 0         | 2 | 45649123 | 45653991 |
| FNDC7 (1 of 4)    | 0         | 0         | 0         | 1.084802  | 0         | 0         | 2 | 45675289 | 45682103 |
| si:dkeyp-51f11.9  | 0         | 0         | 0         | 0         | 0         | 0         | 2 | 45691374 | 45694499 |
| si:dkeyp-51f11.8  | 0         | 0.3253697 | 1.0086656 | 0         | 0         | 0         | 2 | 45698462 | 45707715 |
| prpf38b           | 35.576206 | 36.13636  | 34.427155 | 30.145267 | 31.537887 | 20.693466 | 2 | 45710634 | 45719285 |
| fam102ba          | 1.5562539 | 1.0354787 | 2.2470321 | 1.0191661 | 0.6041109 | 0.6233748 | 2 | 45720833 | 45746468 |
| CU467828.1        | 0.2974212 | 0         | 0         | 0         | 0         | 0         | 2 | 45752083 | 45931456 |
| si:ch211-170p16.1 | 0         | 0         | 0         | 0         | 0         | 0         | 2 | 46050492 | 46053459 |
| itgblb            | 26.528126 | 41.840699 | 50.49062  | 58.732079 | 53.2441   | 47.757238 | 2 | 46095866 | 46102453 |
| 5S_rRNA (2 463194 | 0         | 0         | 0         | 0         | 0         | 0         | 2 | 46319414 | 46319550 |
| GPC6 (4 of 4)     | 1.0301409 | 0         | 0         | 0         | 0         | 0         | 2 | 46421273 | 46423420 |
| gpc1b             | 0.496969  | 0.4629329 | 3.5877988 | 2.8477498 | 0.4501344 | 0.6967326 | 2 | 46430883 | 46442745 |
| EPHB1             | 0         | 0.2934148 | 0         | 0.1804952 | 0         | 0         | 2 | 46498776 | 46805910 |
| CABZ01044741.1    | 0         | 0         | 0         | 0         | 0         | 0         | 2 | 46965059 | 46987692 |
| 5S_rRNA (2 470393 | 0         | 0         | 0         | 0         | 0         | 0         | 2 | 47039302 | 47039418 |
| si:ch211-226f6.1  | 0         | 0         | 0         | 0         | 0         | 0         | 2 | 47181435 | 47182794 |

|                      |           |           |           |           |           |           |   |   |          |          |
|----------------------|-----------|-----------|-----------|-----------|-----------|-----------|---|---|----------|----------|
| si:ch211-284d12.1    | 0         | 0         | 0         | 0         | 0         | 0         | 0 | 2 | 47255728 | 47256686 |
| si:ch211-284d12.2    | 0         | 0         | 0         | 0         | 0         | 0         | 0 | 2 | 47291965 | 47292601 |
| 5S_rRNA (2 473032)   | 0         | 0         | 0         | 0         | 0         | 0         | 0 | 2 | 47303227 | 47303341 |
| si:ch211-284d12.3    | 0         | 0         | 0         | 0         | 0         | 0.6379638 | 0 | 2 | 47392211 | 47413529 |
| CU633981.2           | 0         | 0         | 0         | 0         | 0         | 1.204847  | 0 | 2 | 47419289 | 47422014 |
| CU633981.1           | 0         | 0         | 0         | 0         | 0         | 0         | 0 | 2 | 47425941 | 47432044 |
| wu:fb63a08           | 0         | 0         | 0         | 0.4818085 | 0         | 0.8840972 | 0 | 2 | 47429190 | 47435272 |
| CABZ01078499.2       | 0         | 0         | 0         | 0         | 0         | 0         | 0 | 2 | 47440933 | 47444779 |
| CABZ01078499.1       | 0         | 0         | 0         | 0         | 0         | 0         | 0 | 2 | 47441887 | 47444778 |
| si:dkey-20f20.6      | 0         | 0         | 0         | 0         | 0         | 0         | 0 | 2 | 47466663 | 47470565 |
| acs13b               | 15.982569 | 18.263725 | 19.454271 | 18.529767 | 13.298058 | 16.153874 | 0 | 2 | 47496912 | 47540359 |
| si:dkey-20f20.4      | 0.529086  | 0         | 0         | 0         | 0         | 0         | 0 | 2 | 47547466 | 47580215 |
| pax3a                | 8.9525918 | 7.2970211 | 9.233143  | 8.0615025 | 8.3985002 | 6.7238633 | 0 | 2 | 47581097 | 47641979 |
| si:dkey-20f20.3      | 0         | 0         | 0         | 0         | 0         | 0         | 0 | 2 | 47663520 | 47667261 |
| BX085193.1           | 0         | 0         | 0         | 0         | 0         | 0         | 0 | 2 | 47682925 | 47685999 |
| scg2b                | 0         | 0.3218763 | 0.2494589 | 0.5940104 | 0.1564888 | 0.2422184 | 0 | 2 | 47704725 | 47707925 |
| ap1s3b               | 10.822214 | 17.33937  | 15.00086  | 19.844431 | 19.996742 | 21.241295 | 0 | 2 | 47709967 | 47743534 |
| CU467824.1           | 0         | 0.8889447 | 0.6889454 | 0         | 0         | 0         | 0 | 2 | 47745990 | 47756677 |
| cul3a                | 37.597703 | 31.049569 | 32.617391 | 31.320813 | 30.90659  | 32.33509  | 0 | 2 | 47766773 | 47804182 |
| mbn1l                | 0         | 0.1640974 | 0.5087117 | 0.2018903 | 0         | 0         | 0 | 2 | 47877473 | 47943654 |
| itr19 (2 47957087..4 | 0         | 0         | 0         | 0         | 0         | 0         | 0 | 2 | 47957088 | 47958388 |
| 5S_rRNA (2 479671    | 0         | 0         | 0         | 0         | 0         | 0         | 0 | 2 | 47967141 | 47967256 |
| CU929191.1           | 0         | 0         | 0         | 0         | 0         | 0         | 0 | 2 | 47967748 | 47968739 |
| CU929191.2           | 0         | 0         | 0         | 1.4732986 | 0.5821987 | 1.8022917 | 0 | 2 | 47983693 | 47984626 |
| itr19 (2 47990291..4 | 0         | 0         | 0         | 0         | 0         | 0         | 0 | 2 | 47990292 | 47991634 |
| itr22                | 0         | 0         | 0         | 0.2209948 | 0         | 0         | 0 | 2 | 48011265 | 48018262 |
| itr23                | 1.6692705 | 1.2094029 | 1.3390076 | 1.0628128 | 0.6719813 | 0.7800857 | 0 | 2 | 48020412 | 48047591 |
| itr24                | 1.4643949 | 6.1384609 | 4.9335986 | 6.7130637 | 7.5162093 | 5.8169154 | 0 | 2 | 48050376 | 48037975 |
| itr26 (2 48041197..4 | 0         | 0         | 0         | 0.6295555 | 0         | 0         | 0 | 2 | 48041198 | 48047579 |
| itr26 (2 48049647..4 | 0         | 0         | 0         | 0         | 0         | 0         | 0 | 2 | 48049648 | 48052583 |
| itr26 (2 48056362..4 | 0         | 0         | 0         | 0         | 0         | 0         | 0 | 2 | 48056363 | 48057664 |
| itr27                | 0.5732848 | 0         | 1.6555003 | 0         | 2.0770331 | 0         | 0 | 2 | 48059139 | 48060047 |
| fzd8b                | 2.414047  | 1.729781  | 3.2174546 | 2.7666121 | 3.0275258 | 6.5084749 | 0 | 2 | 48069333 | 48071845 |
| BX548047.2           | 0         | 0         | 0         | 0         | 0         | 0         | 0 | 2 | 48096548 | 48098223 |
| si:ch211-77g15.32    | 0         | 0         | 0         | 0         | 0         | 0         | 0 | 2 | 48100834 | 48102714 |
| BX548047.1           | 0         | 0         | 0         | 0         | 0         | 0         | 0 | 2 | 48108982 | 48110499 |
| klf6b                | 0         | 0         | 0.5926021 | 0         | 0         | 0         | 0 | 2 | 48188415 | 48196354 |
| pitml                | 12.74016  | 15.936518 | 15.767284 | 19.467768 | 17.474135 | 13.438461 | 0 | 2 | 48203229 | 48233581 |
| pfkpb                | 0         | 0         | 0         | 0.5028276 | 0.1589606 | 0         | 0 | 2 | 48233666 | 48286440 |
| si:dkeyp-12a9.5      | 0         | 0.4730076 | 0         | 1.7458348 | 0         | 1.4237909 | 0 | 2 | 48296776 | 48310264 |
| gigfy2               | 15.104639 | 18.235671 | 21.378727 | 25.852062 | 22.141899 | 17.553922 | 0 | 2 | 48317450 | 48370015 |
| si:ch211-195j11.8    | 0         | 0         | 0         | 0         | 0         | 0         | 0 | 2 | 48377202 | 48379013 |
| 5S_rRNA (2 483910    | 0         | 0         | 0         | 0         | 0         | 0         | 0 | 2 | 48391058 | 48391172 |
| lpar5a               | 0         | 0.2766989 | 0         | 0         | 0         | 0         | 0 | 2 | 48396762 | 48398332 |
| itm2cb               | 27.005961 | 18.121132 | 22.470635 | 45.638297 | 40.837283 | 41.711695 | 0 | 2 | 48398577 | 48420960 |
| hes6                 | 39.90093  | 51.977435 | 47.259722 | 56.088686 | 33.599514 | 36.273379 | 0 | 2 | 48402633 | 48418868 |
| per2                 | 1.033182  | 1.4436331 | 1.3674677 | 2.4668238 | 2.2615518 | 0.9656559 | 0 | 2 | 48423772 | 48489514 |
| si:ch211-195j11.24   | 0         | 0         | 0         | 0         | 0         | 0         | 0 | 2 | 48519216 | 48520377 |
| si:ch211-195j11.27   | 0         | 0         | 0         | 0         | 0         | 0         | 0 | 2 | 48528118 | 48529568 |
| CR381673.2           | 0         | 0         | 0         | 0         | 0         | 0         | 0 | 2 | 48574935 | 48582050 |
| CR381673.1 (2 4859   | 0         | 0         | 0         | 0         | 0         | 0         | 0 | 2 | 48595934 | 48629072 |
| CR381673.1 (2 487    | 0         | 0         | 0         | 0         | 0         | 0.6333319 | 0 | 2 | 48710962 | 48717469 |
| CR381673.3           | 0         | 0         | 0         | 1.2252174 | 0.4841652 | 0         | 0 | 2 | 48732060 | 48735452 |
| CR391991.2           | 0         | 0         | 0         | 0         | 0         | 0         | 0 | 2 | 48853842 | 48854551 |
| CR391991.1           | 0         | 0         | 1.7144748 | 0         | 0         | 0         | 0 | 2 | 48911934 | 48912326 |
| wu:fj40e01           | 0         | 0         | 0         | 2.9821974 | 0.7856436 | 1.2160444 | 0 | 2 | 48937401 | 48943912 |
| BX005223.4           | 0         | 0         | 0         | 0         | 0         | 0         | 0 | 2 | 48983386 | 48993667 |
| BX005223.3           | 0         | 0         | 0         | 0         | 0         | 0         | 0 | 2 | 48999689 | 49001537 |
| BX005223.5 (2 4900   | 0         | 0         | 0         | 0         | 0         | 0         | 0 | 2 | 49009151 | 49012479 |
| BX005223.2           | 0         | 0         | 0         | 0         | 0         | 0         | 0 | 2 | 49041004 | 49045324 |
| BX005223.1           | 0         | 0         | 0         | 0         | 0         | 0         | 0 | 2 | 49095879 | 49097256 |
| BX005223.5 (2 491    | 0         | 0         | 0         | 0         | 0         | 0         | 0 | 2 | 49119527 | 49186410 |
| zgc:123035           | 0         | 0         | 0         | 1.5637643 | 3.0897386 | 1.9129588 | 0 | 2 | 49286037 | 49286720 |
| CABZ01044732.1       | 0         | 0         | 0         | 0         | 0         | 0         | 0 | 2 | 49295576 | 49298552 |
| 5S_rRNA (2 493095    | 0         | 0         | 0         | 0         | 0         | 0         | 0 | 2 | 49309547 | 49309676 |

|                     |           |           |           |           |           |           |   |          |          |
|---------------------|-----------|-----------|-----------|-----------|-----------|-----------|---|----------|----------|
| svilb (2 49311117.4 | 6.5169309 | 5.9414419 | 7.1072636 | 13.745607 | 14.882524 | 9.5252899 | 2 | 49311118 | 49391635 |
| svilb (2 49462106.4 | 0         | 0         | 0.1449943 | 0         | 0         | 0         | 2 | 49462107 | 49467357 |
| KCNJ9               | 0         | 0         | 0         | 0.3537086 | 0         | 0         | 2 | 49512969 | 49528843 |
| cdc34b              | 18.75803  | 13.015857 | 17.964011 | 22.15568  | 20.804409 | 24.151301 | 2 | 49569956 | 49594175 |
| ABHD17A (2 of 2)    | 17.820438 | 13.2237   | 12.647165 | 13.153839 | 13.405266 | 20.749102 | 2 | 49601523 | 49626268 |
| SEMA6B (1 of 2)     | 1.069081  | 1.4937937 | 1.5436165 | 0.8168116 | 0.3227768 | 0.7494065 | 2 | 49802577 | 49912504 |
| GPR35 (3 of 3)      | 0         | 0         | 0         | 0         | 0         | 0         | 2 | 49936705 | 49937559 |
| rorc                | 0         | 0.408739  | 1.9006731 | 0.7543123 | 0.5961583 | 2.1530904 | 2 | 49987900 | 50017464 |
| sh3gl1a             | 23.806391 | 17.65025  | 19.992687 | 21.43684  | 27.723689 | 27.586041 | 2 | 50027864 | 50081696 |
| stap2a              | 3.4506809 | 2.4580346 | 1.465395  | 4.1872698 | 3.4931921 | 2.8457238 | 2 | 50092416 | 50139542 |
| si:ch211-209f23.3   | 0.4557166 | 0         | 0         | 0         | 0         | 0         | 2 | 50126006 | 50128170 |
| sema4e              | 4.4811131 | 7.0529816 | 8.255026  | 4.0730365 | 4.1987706 | 1.7330646 | 2 | 50139218 | 50173919 |
| cactin              | 23.755843 | 25.448199 | 24.867795 | 25.523739 | 34.6963   | 30.182509 | 2 | 50179034 | 50197341 |
| BX323861.1          | 0         | 0         | 0         | 0         | 0         | 0         | 2 | 50201281 | 50203389 |
| BX284666.1          | 0         | 0         | 0         | 0         | 0         | 0         | 2 | 50313783 | 50315978 |
| si:ch211-190k17.13  | 0         | 0         | 0         | 0         | 0         | 0         | 2 | 50337816 | 50339790 |
| si:ch211-190k17.17  | 0         | 0         | 0         | 0         | 0         | 0         | 2 | 50362746 | 50363555 |
| si:ch211-190k17.19  | 0         | 0         | 0         | 0         | 0         | 0         | 2 | 50369708 | 50371249 |
| wdr48               | 10.076665 | 10.5194   | 8.7798218 | 8.3625879 | 8.9696745 | 7.5507032 | 2 | 50376130 | 50404290 |
| blvra               | 13.702723 | 8.154944  | 13.739572 | 7.8519847 | 8.6190098 | 4.8026812 | 2 | 50414868 | 50430961 |
| si:ch211-190k17.31  | 0.5690901 | 0         | 0         | 0         | 0.5154588 | 0         | 2 | 50425984 | 50427031 |
| rp137 (2 50430959.5 | 5.1927357 | 5.4820456 | 3.4989023 | 3.1739312 | 4.3898126 | 1.9413409 | 2 | 50430960 | 50437026 |
| hecwl               | 0         | 0.2763471 | 0.1427821 | 0.2266613 | 0.1791381 | 0         | 2 | 50454934 | 50548465 |
| ccr12.3             | 0         | 0         | 0         | 0         | 0         | 0         | 2 | 50554397 | 50555589 |
| si:ch211-106n13.3   | 0         | 0         | 0         | 0.127822  | 0.2020441 | 0.1563652 | 2 | 50557326 | 50623244 |
| ZCCHC2              | 3.4881503 | 2.6841682 | 3.5036132 | 3.3023532 | 5.4946538 | 3.6145409 | 2 | 50632528 | 50670220 |
| exoc3               | 9.0037953 | 10.543845 | 11.143141 | 10.466187 | 7.805763  | 6.6721555 | 2 | 50675049 | 50696575 |
| ahr1b               | 0         | 0         | 0         | 0         | 0         | 0         | 2 | 50703832 | 50768566 |
| mcm6l               | 0.3610475 | 1.177121  | 0.5213065 | 1.0344437 | 1.7986223 | 2.5308778 | 2 | 50769976 | 50795733 |
| si:ch211-120f16.3   | 0         | 0         | 1.871635  | 0         | 0         | 0         | 2 | 50772876 | 50773533 |
| cull1a              | 21.503047 | 26.824284 | 27.234786 | 26.805222 | 25.513198 | 26.796887 | 2 | 50799421 | 50842315 |
| cntnap2b            | 0         | 0         | 0.3441208 | 1.0925585 | 0         | 0         | 2 | 50849183 | 50870460 |
| viml                | 0         | 0.2621797 | 0         | 0.3225618 | 0         | 0         | 2 | 50896948 | 50915380 |
| CNTNAP2 (4 of 4)    | 0         | 0.1140031 | 0.7068331 | 0.7012948 | 0         | 0         | 2 | 50964823 | 51035413 |
| CNTNAP2 (2 of 4)    | 0         | 0         | 0         | 0         | 1.1007194 | 0         | 2 | 51134319 | 51138378 |
| CABZ01053212.1      | 0         | 0         | 0         | 0         | 0         | 0         | 2 | 51171499 | 51189739 |
| 5S_rRNA (2 511969   | 0         | 0         | 0         | 0         | 0         | 0         | 2 | 51196969 | 51197085 |
| neurod6b            | 0         | 0.271514  | 0         | 0         | 0         | 0         | 2 | 51233146 | 51235788 |
| CABZ01053219.1      | 0         | 0         | 0         | 0         | 0         | 0         | 2 | 51304861 | 51308734 |
| CABZ01053221.1      | 0         | 0         | 0         | 0         | 0         | 0         | 2 | 51313236 | 51314231 |
| 5S_rRNA (2 51316    | 0         | 0         | 0         | 0         | 0         | 0         | 2 | 51316103 | 51316219 |
| XCRI (4 of 4)       | 0         | 0         | 0         | 0         | 0         | 0         | 2 | 51324849 | 51325907 |
| FYCO1 (1 of 2)      | 0.1133756 | 0.6336647 | 0.6547994 | 0.9095364 | 1.2322923 | 0.7947423 | 2 | 51329179 | 51371813 |
| scn12aa (2 5147041  | 0         | 0         | 0         | 0.1734136 | 0         | 0         | 2 | 51470415 | 51506531 |
| ACVR2B (2 of 2)     | 5.3844675 | 6.9662495 | 19.004294 | 17.141263 | 17.340564 | 13.000762 | 2 | 51541542 | 51569913 |
| 5S_rRNA (2 515447   | 0         | 0         | 0         | 0         | 0         | 0         | 2 | 51544760 | 51544891 |
| crygn1              | 0         | 0         | 0         | 2.0055278 | 2.6417265 | 0         | 2 | 51587030 | 51598133 |
| CABZ01040054.1      | 0         | 0         | 0         | 0         | 0         | 0         | 2 | 51627068 | 51627372 |
| CABZ01040055.1      | 0         | 0         | 0         | 0         | 0         | 0         | 2 | 51633350 | 51641977 |
| si:ch211-9d9.1      | 0.7055547 | 1.4459128 | 2.6487003 | 1.9406377 | 2.3006267 | 2.9674867 | 2 | 51648981 | 51671212 |
| tgm11l              | 0.1095946 | 0.1020888 | 0         | 0         | 0.794131  | 0         | 2 | 51686652 | 51738436 |
| abhd4               | 1.1942517 | 0.5562303 | 1.2932603 | 2.3951707 | 0.8112788 | 0.8371489 | 2 | 51748981 | 51760936 |
| dad1                | 152.05575 | 144.57238 | 169.58275 | 210.31752 | 167.17083 | 132.31656 | 2 | 51762047 | 51765500 |
| pigr                | 0         | 0         | 0         | 0         | 0         | 0         | 2 | 51771670 | 51792638 |
| si:ch211-9d9.8      | 0         | 0         | 0         | 0         | 0         | 0         | 2 | 51794747 | 51795507 |
| si:ch211-9d9.7      | 0         | 0         | 0         | 0         | 0         | 0         | 2 | 51812256 | 51813699 |
| CABZ01040076.1      | 0         | 0         | 0         | 0         | 0         | 0         | 2 | 51905766 | 51907213 |
| si:dkeyp-104b3.1    | 0         | 0         | 0         | 0         | 0         | 0         | 2 | 51949325 | 51956701 |
| si:dkeyp-104b3.2    | 0         | 0         | 0         | 0         | 0         | 0         | 2 | 51963213 | 51966978 |
| 5S_rRNA (2 519904   | 0         | 0         | 0         | 0         | 0         | 0         | 2 | 51990489 | 51990603 |
| si:dkeyp-104b3.18   | 0         | 0         | 0         | 0         | 0         | 0         | 2 | 52033367 | 52034083 |
| si:dkeyp-104b3.21   | 0         | 0         | 0         | 0         | 0         | 0         | 2 | 52087439 | 52096308 |
| si:ch211-215e19.2   | 0         | 0         | 0         | 0         | 0         | 0         | 2 | 52101894 | 52103230 |
| si:ch211-215e19.8   | 0         | 0         | 0         | 0         | 0         | 0         | 2 | 52114144 | 52117464 |
| si:ch211-215e19.3   | 0         | 0         | 0         | 0         | 0         | 0         | 2 | 52127474 | 52136302 |

|                      |           |           |           |           |           |           |   |   |          |           |
|----------------------|-----------|-----------|-----------|-----------|-----------|-----------|---|---|----------|-----------|
| si:ch211-215e19.4    | 0         | 0         | 0         | 0         | 0         | 0         | 0 | 2 | 52142208 | 52144286  |
| si:ch211-215e19.6    | 0         | 0         | 0         | 0         | 0         | 0         | 0 | 2 | 52158710 | 52160911  |
| si:ch211-215e19.7    | 0         | 0         | 0         | 0         | 0         | 0         | 0 | 2 | 52196883 | 52197526  |
| lrre24               | 0         | 0.0588219 | 0         | 0         | 0         | 0         | 0 | 2 | 52212554 | 52234826  |
| 5S_rRNA (2 52244)    | 0         | 0         | 0         | 0         | 0         | 0         | 0 | 2 | 52244131 | 52244247  |
| 5S_rRNA (2 52267)    | 0         | 0         | 0         | 0         | 0         | 0         | 0 | 2 | 52267095 | 52267209  |
| THEM6 (2 of 2)       | 14.3724   | 17.571845 | 14.266939 | 26.251374 | 23.188206 | 25.816658 | 0 | 2 | 52308605 | 52319443  |
| THEM6 (1 of 2)       | 0.7436715 | 1.0391091 | 0         | 1.2784241 | 0         | 0.5213003 | 0 | 2 | 52321434 | 52327464  |
| itr67                | 17.032991 | 13.066485 | 11.211727 | 18.085275 | 17.015952 | 16.856216 | 0 | 2 | 52331004 | 52352304  |
| eef1da               | 59.059578 | 55.7896   | 54.047215 | 52.114328 | 57.260953 | 64.140382 | 0 | 2 | 52386821 | 52418406  |
| BX255896.2           | 0         | 0         | 0         | 0         | 0         | 0         | 0 | 2 | 52443979 | 52445580  |
| BX255896.1           | 0         | 0         | 0         | 0         | 0         | 0         | 0 | 2 | 52446230 | 52447144  |
| ghrhra               | 0         | 0         | 0         | 0         | 0         | 0         | 0 | 2 | 52451957 | 52511984  |
| adcyp1rla            | 0         | 0         | 0         | 0         | 0         | 0         | 0 | 2 | 52526157 | 52556894  |
| CU929148.1           | 0.3686049 | 0.3433602 | 0         | 0         | 0         | 0         | 0 | 2 | 52560070 | 52636980  |
| THEG                 | 0         | 0         | 0         | 0.4848662 | 0         | 0         | 0 | 2 | 52669981 | 52687014  |
| shda                 | 2.8877095 | 1.344969  | 1.6677936 | 1.3237807 | 1.0462283 | 0.8096929 | 0 | 2 | 52716172 | 52743793  |
| ccdc94               | 23.902327 | 15.190359 | 16.449602 | 23.041008 | 19.424088 | 23.801639 | 0 | 2 | 52746237 | 52760438  |
| scn12aa (2 5278962)  | 0         | 0         | 0         | 0         | 0         | 0         | 0 | 2 | 52789628 | 52789894  |
| CABZ01040021.1       | 0         | 0.579592  | 1.7967696 | 0         | 1.1271366 | 0.8723092 | 0 | 2 | 52814258 | 52828309  |
| PPAP2C (1 of 2)      | 0         | 0.503118  | 0.7798479 | 0.6189901 | 0         | 0.7572128 | 0 | 2 | 52861686 | 52935538  |
| TLE1                 | 0.2439382 | 1.5906209 | 0.7044314 | 0.2795648 | 0.4418988 | 0         | 0 | 2 | 52954905 | 53014572  |
| chico                | 0.3703602 | 5.8649186 | 7.4865401 | 10.186808 | 12.747379 | 8.3077067 | 0 | 2 | 53035303 | 53084360  |
| gnai1b               | 3.3615885 | 2.7834331 | 2.8987404 | 5.3507494 | 3.2139464 | 3.4037077 | 0 | 2 | 53090568 | 53178564  |
| C2CD4C (2 of 2)      | 0.3677335 | 0.3425484 | 0         | 0         | 0         | 0         | 0 | 2 | 53375472 | 53376740  |
| RAB31                | 3.174516  | 0.7392755 | 2.291798  | 0         | 0.7188371 | 7.788475  | 0 | 2 | 53411307 | 53432629  |
| ralbp1               | 0.8539665 | 0.867797  | 1.4572038 | 2.0463434 | 2.5314165 | 1.3060693 | 0 | 2 | 53435983 | 53470581  |
| zgc:165603           | 0         | 0         | 0         | 0         | 0         | 0         | 0 | 2 | 53510777 | 53543519  |
| sirt6                | 15.147316 | 17.90874  | 16.403094 | 19.362565 | 27.175813 | 19.602454 | 0 | 2 | 53554287 | 53645654  |
| si:ch211-155i14.1 (2 | 0         | 0         | 0         | 0         | 0         | 0         | 0 | 2 | 53588514 | 53590833  |
| CR384061.1           | 0         | 0         | 0         | 0         | 0         | 0         | 0 | 2 | 53626191 | 53626272  |
| rxip3.2a             | 0         | 0         | 0         | 0         | 0         | 0         | 0 | 2 | 53781623 | 53782819  |
| 5S_rRNA (2 537952)   | 0         | 0         | 0         | 0         | 0         | 0         | 0 | 2 | 53795271 | 53795385  |
| CREB3L3 (1 of 2)     | 2.8435238 | 3.2373958 | 5.0180601 | 7.6038968 | 9.1575083 | 9.7448218 | 0 | 2 | 53806113 | 53854173  |
| CELF5 (1 of 2)       | 0         | 0         | 0         | 0         | 0         | 0         | 0 | 2 | 53876129 | 53912269  |
| CABZ01117637.1       | 0         | 0         | 0         | 0         | 0         | 0         | 0 | 2 | 54003041 | 54008440  |
| HSD11B1L (2 of 2)    | 0         | 1.0132727 | 0         | 2.4932746 | 3.9410372 | 4.5750482 | 0 | 2 | 54045004 | 54068709  |
| admp                 | 0         | 0.4676643 | 1.4497872 | 1.1507421 | 0.2273675 | 1.4077072 | 0 | 2 | 54071703 | 54087723  |
| im:7138239           | 0         | 0         | 0         | 0         | 0         | 0         | 0 | 2 | 54088548 | 54112518  |
| CU694222.2           | 0         | 0         | 0         | 0         | 0         | 0         | 0 | 2 | 54130893 | 54144217  |
| CU693369.1           | 0         | 0         | 0         | 0         | 0         | 0         | 0 | 2 | 54170996 | 54179310  |
| RANBP3 (1 of 2)      | 63.522267 | 66.079009 | 66.736478 | 82.713857 | 60.67016  | 66.878579 | 0 | 2 | 54206171 | 54261877  |
| 5S_rRNA (2 542732)   | 0         | 0         | 0         | 0         | 0         | 0         | 0 | 2 | 54273252 | 54273369  |
| ctnmb11              | 57.348937 | 54.713711 | 49.749506 | 52.47367  | 54.248338 | 56.410481 | 0 | 2 | 54307209 | 54402862  |
| capsla               | 6.3061331 | 4.0667835 | 2.1012119 | 0         | 1.3181172 | 0.6800747 | 0 | 2 | 54479382 | 54485838  |
| abhd8                | 0         | 0         | 0         | 0         | 0         | 0         | 0 | 2 | 54597840 | 54609170  |
| 5S_rRNA (2 546242)   | 0         | 0         | 0         | 0         | 0         | 0         | 0 | 2 | 54624264 | 54624380  |
| CABZ01050249.1       | 0         | 3.2931361 | 8.7505015 | 2.3151836 | 0.9148836 | 0         | 0 | 2 | 54634186 | 54644843  |
| CU179656.1           | 0.1888675 | 0.0351865 | 0.0545401 | 0         | 0         | 0.0529571 | 0 | 2 | 54798988 | 54950572  |
| napg                 | 0.4974988 | 0         | 0.7183247 | 4.5612572 | 0         | 0         | 0 | 2 | 54956218 | 54979500  |
| rab12                | 6.3312972 | 5.8976835 | 9.1415853 | 5.5486802 | 8.7706164 | 12.009045 | 0 | 2 | 54979658 | 55010979  |
| SOGA2                | 0.3499466 | 0.1629899 | 0.7579174 | 0.6015831 | 0.3169676 | 0.2453063 | 0 | 2 | 55022580 | 55094860  |
| SOGA1                | 1.3115623 | 0.2443474 | 0.7574914 | 0.9018675 | 0         | 0.3677526 | 0 | 2 | 55139956 | 55151816  |
| CABZ01087853.1       | 0.6029119 | 0.8424302 | 1.7410558 | 1.3819313 | 2.1843733 | 4.2263043 | 0 | 2 | 55186164 | 55226184  |
| ndufv2               | 63.735383 | 82.085916 | 68.01904  | 92.098662 | 96.382231 | 91.685706 | 0 | 2 | 55227956 | 55277424  |
| ankrd12              | 2.4989114 | 3.2588746 | 4.329731  | 4.5821932 | 4.2681505 | 2.202127  | 0 | 2 | 55283371 | 55388809  |
| CU570683.1           | 2.1755424 | 7.0929086 | 6.2824113 | 12.466373 | 8.8673338 | 1.5250161 | 0 | 2 | 55398717 | 554515486 |
| twsg1a               | 0.3658117 | 1.249447  | 0.1760618 | 1.1179669 | 1.3253501 | 2.2223712 | 0 | 2 | 55427608 | 55462812  |
| mf126                | 0         | 0.8676526 | 2.6897749 | 2.1349597 | 3.3746606 | 3.9175563 | 0 | 2 | 55472895 | 55479329  |
| HCN2 (2 of 2)        | 0         | 0         | 0         | 0         | 0.1553386 | 0         | 0 | 2 | 55503950 | 55663728  |
| CABZ01112877.1       | 0.9150075 | 3.4093645 | 0         | 0         | 0         | 1.2828076 | 0 | 2 | 55803426 | 55814829  |
| calr1                | 67.04605  | 60.279221 | 57.634051 | 40.139226 | 51.26095  | 53.934772 | 0 | 2 | 55840231 | 55854933  |
| EPS15L1 (1 of 2)     | 1.3826781 | 1.5026458 | 1.6636756 | 0.2641024 | 1.043645  | 1.9384649 | 0 | 2 | 55859792 | 55896981  |
| CABZ01118627.1       | 0         | 0         | 0         | 0         | 0         | 0         | 0 | 2 | 55936475 | 55962017  |
| rab8a                | 2.2824332 | 2.5126819 | 10.785411 | 4.5181595 | 3.1949738 | 5.5270814 | 0 | 2 | 55967916 | 55993632  |



|                      |           |           |           |           |           |           |   |          |          |
|----------------------|-----------|-----------|-----------|-----------|-----------|-----------|---|----------|----------|
| tpm4b                | 22.810524 | 18.432253 | 20.237467 | 24.567125 | 29.124335 | 24.273622 | 2 | 55995983 | 56012592 |
| rx2                  | 1.7986658 | 2.0478088 | 4.6169669 | 1.3742374 | 2.172212  | 1.6811098 | 2 | 56045666 | 56074438 |
| cplx4c               | 0         | 0.2343364 | 0         | 0         | 0         | 0         | 2 | 56106356 | 56216886 |
| atcayb               | 0         | 0         | 0         | 0         | 0         | 0         | 2 | 56129980 | 56169710 |
| nmrk2                | 0.4668873 | 0.2174557 | 0         | 1.0701499 | 0.2114438 | 0         | 2 | 56196027 | 56203416 |
| lox15b               | 9.7473389 | 9.0797696 | 12.314674 | 14.801458 | 18.319649 | 15.715231 | 2 | 56225103 | 56254977 |
| jund                 | 0.467589  | 1.3066953 | 0         | 1.6076375 | 1.2705699 | 0.655543  | 2 | 56343402 | 56344399 |
| pgpep1               | 4.5638518 | 3.1884643 | 4.9422148 | 4.7945244 | 7.2340677 | 7.997945  | 2 | 56353059 | 56375691 |
| upf1                 | 17.081161 | 17.93052  | 21.533192 | 24.246192 | 24.895646 | 19.084803 | 2 | 56382690 | 56448130 |
| uba52                | 3241.1744 | 3609.888  | 3124.423  | 3129.0546 | 3032.8725 | 3321.2821 | 2 | 56552145 | 56561814 |
| CERS4 (1 of 2)       | 0         | 0         | 1.1146214 | 0         | 0         | 0         | 2 | 56569739 | 56598459 |
| CTXN1                | 0         | 0         | 0         | 0         | 0         | 0         | 2 | 56644028 | 56644297 |
| rab11bb (2 5667394   | 0         | 0         | 0         | 0         | 0         | 0.5544338 | 2 | 56673949 | 56688176 |
| fr28l                | 0         | 0         | 0         | 0         | 0         | 0         | 2 | 56697521 | 56704428 |
| si:ch211-117a23.3    | 0         | 0         | 0         | 0         | 0         | 0         | 2 | 56708560 | 56718784 |
| pip5k1cb             | 0         | 0         | 0.334885  | 0         | 0         | 0         | 2 | 56725357 | 56798009 |
| si:ch1073-382c16.2   | 0         | 0         | 0         | 0         | 1.40424   | 0         | 2 | 56859963 | 56863678 |
| slc25a42             | 0.610005  | 0.4261706 | 0.6605771 | 1.1360288 | 1.3122302 | 0.5345032 | 2 | 56873542 | 56912362 |
| ARMC6                | 2.8924825 | 0.598752  | 0.9280835 | 0.7366493 | 1.746596  | 2.7034376 | 2 | 56921908 | 56945353 |
| eef2b                | 1799.6928 | 2107.0052 | 1872.635  | 1809.886  | 1706.1561 | 1791.6066 | 2 | 56950887 | 56976839 |
| BTBD2 (1 of 2)       | 2.3930967 | 3.2199553 | 3.8392514 | 2.4378685 | 1.445047  | 1.8639085 | 2 | 57008133 | 57029578 |
| CABZ01117751.1       | 0         | 0         | 0         | 0         | 0         | 0         | 2 | 57034232 | 57068290 |
| CABZ01117755.1       | 0         | 0         | 0         | 1.1247264 | 0.888909  | 0         | 2 | 57118915 | 57130311 |
| CABZ01117756.1       | 0         | 0         | 0         | 0         | 0         | 0         | 2 | 57136132 | 57140954 |
| rab11bb (2 5719002   | 2.3829133 | 1.4798093 | 1.7203114 | 0.4551552 | 1.4388978 | 1.1135862 | 2 | 57190023 | 57203845 |
| CU469531.1           | 0         | 0         | 0         | 0         | 0         | 0         | 2 | 57214524 | 57220517 |
| CU469531.2           | 0         | 0         | 0         | 0         | 0         | 0         | 2 | 57223990 | 57231924 |
| gpx4b                | 201.78156 | 206.20099 | 167.2692  | 339.08535 | 351.24494 | 342.36611 | 2 | 57368919 | 57382529 |
| POLR2E (1 of 2)      | 0         | 0         | 0         | 0         | 0         | 0         | 2 | 57385084 | 57398104 |
| HMHA1 (1 of 2)       | 0         | 0         | 0         | 0.4853062 | 0.1278513 | 0         | 2 | 57410229 | 57483531 |
| GBGT1 (4 of 10)      | 0         | 0         | 0         | 0         | 0         | 0         | 2 | 57491838 | 57501211 |
| CABZ01024428.1       | 0.57399   | 2.4060552 | 1.6575366 | 2.6312787 | 2.0795879 | 1.6094266 | 2 | 57537989 | 57551652 |
| ncana                | 0.4741346 | 0.4416624 | 0.6845899 | 1.2075128 | 0.3817351 | 0.1477155 | 2 | 57606632 | 57707460 |
| si:ch1073-325m22.2   | 141.97141 | 117.29837 | 110.51559 | 94.793905 | 105.10997 | 152.30796 | 2 | 57733064 | 57733441 |
| mbd3a                | 54.959773 | 56.597108 | 56.058048 | 78.877591 | 84.489578 | 72.810249 | 2 | 57737888 | 57762598 |
| tcf3a                | 6.5725894 | 4.6291697 | 13.193387 | 8.4510961 | 7.4051832 | 5.3938734 | 2 | 57776875 | 57853745 |
| map2k2b              | 1.2525218 | 2.3334799 | 2.3251908 | 2.6658345 | 1.7827602 | 1.0034232 | 2 | 57891760 | 57918126 |
| pias4b               | 1.5624571 | 0.2425748 | 0.3759981 | 0.2984416 | 0.4717369 | 0         | 2 | 57922021 | 57948907 |
| ONECUT3 (1 of 2)     | 0         | 0         | 0         | 0         | 0         | 0         | 2 | 57978989 | 58038804 |
| 5S_rRNA (2 580744    | 0         | 0         | 0         | 0         | 0         | 0         | 2 | 58074471 | 58074585 |
| LINGO3 (1 of 2)      | 0         | 0         | 0         | 0         | 0         | 0         | 2 | 58084207 | 58099551 |
| ncstn                | 4.899253  | 3.9932517 | 5.3054221 | 8.4221639 | 5.5469323 | 2.5757161 | 2 | 58109732 | 58124624 |
| pvr14 (2 58153474... | 1.2114586 | 1.2789542 | 1.1661277 | 1.2032704 | 1.3167484 | 0.4529124 | 2 | 58153475 | 58191051 |
| CU984580.1           | 8.792029  | 6.9299039 | 8.7885471 | 5.4255824 | 1.2251485 | 3.7926487 | 2 | 58192923 | 58201113 |
| CU915267.1 (2 582    | 0         | 0         | 0         | 0         | 0         | 0         | 2 | 58222375 | 58233774 |
| CU984580.4 (2 582    | 0         | 0         | 0         | 0         | 0         | 0         | 2 | 58253742 | 58258254 |
| CR774186.2           | 3.8657715 | 2.0577229 | 1.5947659 | 0.6329082 | 2.5010429 | 1.5484779 | 2 | 58303299 | 58311045 |
| CR774186.1           | 0.3002921 | 0.5594517 | 0.8671668 | 0.6882978 | 0.5439849 | 0         | 2 | 58313646 | 58339136 |
| si:dkeyp-68b7.5 (2 5 | 0.2464504 | 0         | 0.1779215 | 0.4236658 | 0.1116124 | 0         | 2 | 58340428 | 58353694 |
| arhgap30             | 0         | 0         | 0         | 0         | 0         | 0         | 2 | 58361519 | 58399320 |
| si:ch211-155e24.5    | 0         | 0         | 0         | 0         | 0         | 0         | 2 | 58369801 | 58370736 |
| si:ch211-155e24.6    | 0         | 0         | 0         | 0         | 0         | 0         | 2 | 58378004 | 58382083 |
| si:ch211-155e24.3    | 3.8483977 | 3.7176027 | 4.3217962 | 4.7371456 | 4.0021269 | 2.5977443 | 2 | 58414089 | 58434168 |
| si:ch211-155e24.2    | 0.8562456 | 1.5952072 | 0         | 0         | 1.5511055 | 0         | 2 | 58431639 | 58433101 |
| pvr14 (2 58439049... | 0         | 0.8781696 | 0         | 1.080419  | 1.2808371 | 0         | 2 | 58439050 | 58448431 |
| si:dkeyp-68b7.10     | 0         | 0         | 0         | 0         | 0         | 0         | 2 | 58620785 | 58637964 |
| 5S_rRNA (2 586233    | 0         | 0         | 0         | 0         | 0         | 0         | 2 | 58623333 | 58623447 |
| sf3a2                | 96.099281 | 80.838696 | 52.273389 | 128.74428 | 136.71274 | 162.71826 | 2 | 58644257 | 58656663 |
| plekhjl              | 0.6833843 | 0.7275213 | 1.2686396 | 1.5663815 | 0.530556  | 0         | 2 | 58667669 | 58690078 |
| TPGS1 (1 of 2)       | 2.4668926 | 4.5958834 | 7.7174026 | 5.6543514 | 4.8412257 | 5.7641577 | 2 | 58698172 | 58710329 |
| si:dkeyp-68b7.7      | 1.2868772 | 1.498428  | 2.5548689 | 1.4748222 | 2.1855028 | 2.029675  | 2 | 58711491 | 58719262 |
| si:dkeyp-68b7.6      | 1.0159373 | 0.3154528 | 2.9337675 | 0.3881041 | 0.920195  | 1.8990766 | 2 | 58732315 | 58737139 |
| si:dkeyp-68b7.5 (2 5 | 0.8717846 | 1.3921344 | 0.8991041 | 1.5700244 | 0.7896274 | 1.2222106 | 2 | 58738265 | 58760688 |
| CU984580.4 (2 587    | 0         | 0         | 0         | 0         | 0         | 0         | 2 | 58773987 | 58790437 |
| CU915267.1 (2 587    | 0         | 0         | 0         | 0         | 0         | 0         | 2 | 58791605 | 58794724 |

|                     |           |           |           |           |           |           |   |   |          |          |
|---------------------|-----------|-----------|-----------|-----------|-----------|-----------|---|---|----------|----------|
| KCNJ10 (2 of 2)     | 0         | 0         | 0         | 0         | 0         | 0         | 0 | 2 | 58822161 | 58829594 |
| si:ch1073-185p12.3  | 0         | 0         | 0         | 0         | 0         | 0         | 0 | 2 | 58838190 | 58838833 |
| pnp5b               | 1.6189206 | 1.8850562 | 1.753136  | 2.3191995 | 1.0997647 | 2.2696683 |   | 2 | 58850206 | 58864548 |
| si:ch1073-185p12.2  | 0         | 0         | 0.2941024 | 0.9337537 | 0.1844942 | 0.5711322 |   | 2 | 58868462 | 58904922 |
| CABZ01052486.1      | 4.7136752 | 6.8999043 | 5.8336676 | 6.1738229 | 3.6595346 | 3.7762303 |   | 2 | 58908628 | 58919029 |
| CABZ01081294.1      | 0         | 0         | 0         | 1.9066218 | 1.5068672 | 0         |   | 2 | 58958976 | 58966658 |
| cpb4113b            | 17.077229 | 15.734746 | 15.008816 | 32.547945 | 24.210572 | 27.584957 |   | 2 | 58969930 | 59038058 |
| FOXL2 (2 of 2)      | 1.0839811 | 2.0194842 | 0         | 0.6211468 | 0.9818263 | 0         |   | 2 | 59124201 | 59125061 |
| AL954696.1          | 19.026107 | 17.962561 | 20.046603 | 19.742202 | 21.89067  | 25.232084 |   | 2 | 59216223 | 59239826 |
| vapal               | 42.986714 | 48.898259 | 47.147299 | 55.896611 | 62.521641 | 51.57364  |   | 2 | 59246438 | 59296669 |
| LRRC30 (1 of 2)     | 0         | 0         | 0         | 0         | 0         | 0         |   | 2 | 59394955 | 59398361 |
| zgc:112425          | 1082.3593 | 919.87647 | 1042.1773 | 536.32244 | 590.01053 | 766.35946 |   | 2 | 59487737 | 59495440 |
| CABZ01088877.1      | 0         | 0         | 0         | 0         | 0         | 0         |   | 2 | 59505728 | 59505816 |
| tem1a               | 1.0877712 | 3.7153331 | 4.7118085 | 2.4932746 | 2.9557779 | 3.0500322 |   | 2 | 59522037 | 59523994 |
| CABZ01085657.1      | 4.1480342 | 0.7727893 | 1.7967696 | 1.9015374 | 3.3814099 | 0         |   | 2 | 59530550 | 59532984 |
| CABZ01092973.1      | 0.831825  | 0.3874278 | 0         | 0.4766554 | 0.3767168 | 0         |   | 2 | 59550923 | 59562634 |
| sugp1               | 19.648583 | 23.086617 | 21.922309 | 34.033199 | 31.346803 | 26.607517 |   | 2 | 59583003 | 59597403 |
| mau2                | 14.336524 | 16.025584 | 26.910144 | 18.073369 | 18.179623 | 24.119148 |   | 2 | 59600501 | 59615379 |
| PRKAB2              | 5.1850428 | 2.1466369 | 1.6636756 | 1.3205121 | 3.6527576 | 0         |   | 2 | 59619446 | 59623198 |
| ndufa13             | 0         | 0         | 0         | 0         | 0         | 0         |   | 2 | 59673089 | 59676041 |
| GATAD2A             | 0         | 0.1037208 | 0         | 0         | 0.1008533 | 0         |   | 2 | 59673268 | 59681384 |
| ptprsb              | 0.6877728 | 0.3203345 | 0.6206601 | 0.4926376 | 0.6229569 | 0.2410582 |   | 2 | 59697319 | 59715893 |
| CABZ01100278.1      | 0         | 1.4205685 | 0         | 0         | 0         | 0         |   | 2 | 59810152 | 59822032 |
| si:ch1073-391i24.1  | 0         | 0.4819224 | 1.4939881 | 0         | 0         | 0         |   | 2 | 59848058 | 59864896 |
| 5S_rRNA (2 59870)   | 0         | 0         | 0         | 0         | 0         | 0         |   | 2 | 59870375 | 59870492 |
| stk11               | 16.304242 | 12.109039 | 16.860622 | 26.260609 | 19.15813  | 25.0202   |   | 2 | 59873261 | 59895753 |
| C2H19orf26 (2 of 2) | 0         | 0         | 0.7107475 | 0         | 0         | 0         |   | 2 | 59908055 | 59915834 |
| CABZ01030469.1      | 0         | 0         | 0         | 0         | 0         | 0         |   | 2 | 59926861 | 59928467 |
| mir9-7              | 0         | 0         | 0         | 0         | 0         | 0         |   | 2 | 59942577 | 59942660 |
| itr65               | 4.5416433 | 2.9085363 | 3.2787767 | 4.8796296 | 2.313921  | 1.5918051 |   | 2 | 59976754 | 59984723 |
| si:ch211-150h8.1    | 0         | 0         | 0         | 0         | 0         | 0         |   | 2 | 59989683 | 59990633 |
| si:ch211-150h8.2    | 0         | 0         | 0         | 0         | 0         | 0         |   | 2 | 59997251 | 59997921 |
| si:ch211-150h8.3    | 0         | 0.5519923 | 0         | 0         | 0         | 0.4153853 |   | 2 | 60000855 | 60004784 |
| itr30               | 0         | 0         | 0         | 0         | 0.5415453 | 0         |   | 2 | 60016649 | 60031424 |
| itr29               | 0.8888645 | 0         | 1.2834069 | 2.3769218 | 0         | 1.246156  |   | 2 | 60047931 | 60057000 |
| itr37               | 0.1823579 | 0.3397374 | 0.2633015 | 0.6269723 | 0.1651724 | 1.0226368 |   | 2 | 60071068 | 60171903 |
| itr32               | 1.0057195 | 0         | 0         | 0         | 0         | 0         |   | 2 | 60071223 | 60073794 |
| itr33               | 0         | 0         | 0         | 0.6782592 | 0         | 0         |   | 2 | 60081176 | 60091504 |
| itr34               | 0         | 0.2528761 | 0.3919655 | 0         | 0         | 0         |   | 2 | 60104663 | 60111068 |
| itr35               | 0         | 0.2582852 | 0         | 0.3177703 | 0.2511445 | 0.3887296 |   | 2 | 60119016 | 60129389 |
| itr36               | 0         | 0.25391   | 0.3935681 | 0.3123875 | 0         | 0         |   | 2 | 60138604 | 60153282 |
| si:dkey-264b2.2     | 0         | 0         | 0         | 0         | 0         | 0         |   | 2 | 60148113 | 60150671 |
| si:dkey-264b2.3     | 1.9203862 | 0         | 0.9242642 | 0         | 0         | 0         |   | 2 | 60161764 | 60162946 |
| itr38               | 0.3277064 | 0         | 0         | 0.375567  | 0.2968232 | 0         |   | 2 | 60193412 | 60202382 |
| itr39p              | 1.6656294 | 1.8101474 | 0.8016521 | 1.5907418 | 1.50866   | 2.7243446 |   | 2 | 60205149 | 60216447 |
| BX537288.1          | 0         | 0         | 0         | 1.0674799 | 0.8436652 | 1.3058521 |   | 2 | 60234130 | 60235990 |

Zv9\_scaffold3504

|                 |           |           |           |   |   |   |               |       |       |
|-----------------|-----------|-----------|-----------|---|---|---|---------------|-------|-------|
| PTCHD3 (1 of 3) | 0         | 0.9790405 | 0         | 0 | 0 | 0 | Zv9_scaffold: | 554   | 997   |
| rab18b          | 9.8242916 | 13.218764 | 12.214881 | 0 | 0 | 0 | Zv9_scaffold: | 8949  | 22048 |
| mib             | 18.719097 | 19.726793 | 23.205848 | 0 | 0 | 0 | Zv9_scaffold: | 38978 | 65722 |
| yme111b         | 6.1890431 | 7.686896  | 8.3404426 | 0 | 0 | 0 | Zv9_scaffold: | 69385 | 82038 |

Zv9\_scaffold3540

|           |           |           |           |   |   |   |               |        |        |
|-----------|-----------|-----------|-----------|---|---|---|---------------|--------|--------|
| WAC       | 0         | 0         | 6.3564963 | 0 | 0 | 0 | Zv9_scaffold: | 3299   | 7062   |
| cables1   | 1.0548233 | 0.786065  | 0.8122828 | 0 | 0 | 0 | Zv9_scaffold: | 23857  | 79366  |
| gata6     | 10.104709 | 11.808616 | 9.815031  | 0 | 0 | 0 | Zv9_scaffold: | 164734 | 175324 |
| MIB1      | 13.837895 | 13.666691 | 20.70233  | 0 | 0 | 0 | Zv9_scaffold: | 221356 | 278892 |
| mir133a-1 | 0         | 0         | 0         | 0 | 0 | 0 | Zv9_scaffold: | 268599 | 268697 |

**Table S4. Summarized results of genomic PCR for the deleted genes in nn2002 allele.**

| predicted position by synteny | Feature ID         | AB - AB1_S1_L01_R1_001 (paired) RNA-Seq - Expression values | AB - AB2_S2_L001_R1_001 (paired) RNA-Seq - Expression values | AB - AB3_S3_L001_R1_001 (paired) RNA-Seq - Expression values | 1207 - 1207-1_S1_L001_R1_001 (paired) RNA-Seq - Expression values | 1207 - 1207-2_S2_L001_R1_001 (paired) RNA-Seq - Expression values | 1207 - 1207-3_S3_L001_R1_001 (paired) RNA-Seq - Expression values | contig                   | scaffold      | LG    | Chromosome region start | Chromosome region end | amplified in mibnn2002 or not (in black means results shown in Fig. 7; in red means results shown in supplementary Fig. 10) |
|-------------------------------|--------------------|-------------------------------------------------------------|--------------------------------------------------------------|--------------------------------------------------------------|-------------------------------------------------------------------|-------------------------------------------------------------------|-------------------------------------------------------------------|--------------------------|---------------|-------|-------------------------|-----------------------|-----------------------------------------------------------------------------------------------------------------------------|
|                               |                    |                                                             |                                                              |                                                              |                                                                   |                                                                   |                                                                   |                          |               |       |                         |                       |                                                                                                                             |
|                               | cldn1              | 4.42325923                                                  | 8.9273643                                                    | 13.837681                                                    | 0                                                                 | 0                                                                 | 0                                                                 |                          |               | LG2   | 88773                   | 91785                 | not amplified in nn2002 gPCR                                                                                                |
|                               | znfl2a             | 69.331429                                                   | 74.932960                                                    | 57.753310                                                    | 0                                                                 | 0                                                                 | 0                                                                 |                          |               | LG2   | 161051                  | 164976                | not amplified in nn2002 gPCR                                                                                                |
|                               | genes not shown    |                                                             |                                                              |                                                              |                                                                   |                                                                   |                                                                   |                          |               |       |                         |                       |                                                                                                                             |
|                               | foxc1a             | 16.336109                                                   | 14.216155                                                    | 18.000801                                                    | 0                                                                 | 0                                                                 | 0                                                                 |                          |               | LG2   | 868215                  | 870389                | not amplified in nn2002 gPCR                                                                                                |
|                               | genes not show     |                                                             |                                                              |                                                              |                                                                   |                                                                   |                                                                   |                          |               |       |                         |                       |                                                                                                                             |
| 1                             | pth1ra             | 0                                                           | 0.6168789                                                    | 0                                                            | 0                                                                 | 0                                                                 | 0                                                                 |                          |               | LG2   | 2092256                 | 2240623               | not amplified in nn2002 gPCR                                                                                                |
| 2                             | chr2               | 0                                                           | 0                                                            | 0                                                            | 0                                                                 | 0                                                                 | 0                                                                 |                          |               | LG2   | 2681130                 | 2785846               | not amplified in nn2002 gPCR                                                                                                |
| 3                             | agp1a.1            | 1.98407249                                                  | 1.4785509                                                    | 2.291798                                                     | 0                                                                 | 0                                                                 | 0                                                                 |                          |               | LG2   | 2888643                 | 2900295               | not amplified in nn2002 gPCR                                                                                                |
| 4                             | thoc1              | 61.949203                                                   | 64.445908                                                    | 62.678010                                                    | 0                                                                 | 0                                                                 | 0                                                                 |                          |               | LG2   | 2923616                 | 2941632               | not amplified in nn2003 gPCR                                                                                                |
| 5                             | usp14              | 56.795291                                                   | 63.368194                                                    | 61.503865                                                    | 0                                                                 | 0                                                                 | 0.29710804                                                        |                          |               | LG2   | 2941647                 | 2964355               | not amplified in nn2002 gPCR                                                                                                |
| 6                             | rock1              | 13.554978                                                   | 13.430877                                                    | 14.585248                                                    | 0                                                                 | 0                                                                 | 0                                                                 |                          |               | LG2   | 2970496                 | 3052905               | not amplified in nn2002 gPCR                                                                                                |
| 7                             | wacb               | 4.95123447                                                  | 2.3060688                                                    | 2.6808565                                                    | 0                                                                 | 0                                                                 | 0                                                                 | cabz0165389, cabz0165390 |               | LG2   | 3070270                 | 3086434               | not amplified in nn2002 gPCR                                                                                                |
| 8                             | mkxb               | 0                                                           | 0                                                            | 0                                                            | 0                                                                 | 0                                                                 | 0                                                                 |                          | Zv9_NA916     | no    | (1686)                  | (9444)                | not amplified in nn2002 gPCR                                                                                                |
| 9                             | rab18b             | 9.82429156                                                  | 13.218764                                                    | 12.214881                                                    | 0                                                                 | 0                                                                 | 0                                                                 | cu694527                 | scaffold 3504 | no    | (8949)                  | (22048)               | not amplified in nn2002 gPCR                                                                                                |
| 10                            | PTCHD3 (3 of 3)    | 0                                                           | 0                                                            | 0                                                            | 0                                                                 | 0                                                                 | 0                                                                 |                          | scaffold 3504 | no    | (61359675)              | (61362524)            | not amplified in nn2002 gPCR                                                                                                |
| 11                            | yme11b             | 6.18904309                                                  | 7.686896                                                     | 8.3404426                                                    | 0                                                                 | 0                                                                 | 0                                                                 | cu681854                 | scaffold 3504 | no    | (69385)                 | (82038)               | not amplified in nn2002 gPCR                                                                                                |
| 12                            | mib                | 18.719097                                                   | 19.726793                                                    | 23.205848                                                    | 0                                                                 | 0                                                                 | 0                                                                 | cu681854, cabz01065400   | scaffold 3504 | no    | (38978)                 | (65722)               | not amplified in nn2002 gPCR                                                                                                |
| 12                            | MIB1               | 13.837895                                                   | 13.666691                                                    | 20.702330                                                    | 0                                                                 | 0                                                                 | 0                                                                 | cabz01065398, BX842700   | scaffold 3540 | no    | (221356)                | (278892)              | not amplified in nn2002 gPCR                                                                                                |
| 13                            | gata6              | 10.104709                                                   | 11.808616                                                    | 9.815031                                                     | 0                                                                 | 0                                                                 | 0                                                                 | BX842700                 | scaffold 3540 | no    | (164734)                | (175324)              | not amplified in nn2002 gPCR                                                                                                |
| 14                            | cables1            | 1.05482335                                                  | 0.786065                                                     | 0.8122828                                                    | 0                                                                 | 0                                                                 | 0                                                                 | BX842700, cabz0165391    | scaffold 3540 | no    | (23857)                 | (79366)               | not amplified in nn2002 gPCR                                                                                                |
| 15                            | npc1^              | 13.884070                                                   | 19.095981                                                    | 20.854080                                                    | 0                                                                 | 0                                                                 | 0                                                                 |                          |               | LG2   | 4310671                 | 4353828               | not amplified in nn2002 gPCR                                                                                                |
| 16                            | egfra^             | 0.35688593                                                  | 0.6648875                                                    | 1.0305955                                                    | 0                                                                 | 0                                                                 | 0                                                                 |                          |               | LG2   | 4190333                 | 4307017               | not amplified in nn2002 gPCR                                                                                                |
|                               | genes not shown    |                                                             |                                                              |                                                              |                                                                   |                                                                   |                                                                   |                          |               |       |                         |                       |                                                                                                                             |
|                               | selt1a             | 33.694727                                                   | 30.712074                                                    | 25.633262                                                    | 0                                                                 | 0                                                                 | 0                                                                 |                          |               | LG2   | 9473203                 | 9485168               | not amplified in nn2002 gPCR                                                                                                |
|                               | dvl3a              | 22.177302                                                   | 22.825406                                                    | 23.064216                                                    | 0                                                                 | 0                                                                 | 0                                                                 |                          |               | LG2   | 9490950                 | 9532978               | not amplified in nn2002 gPCR                                                                                                |
|                               | ap2m1a             | 107.013837                                                  | 96.070221                                                    | 90.231648                                                    | 120.536461                                                        | 119.681194                                                        | 120.825322                                                        |                          |               | LG2   | 9578708                 | 9607608               | amplifiable by gPCR                                                                                                         |
|                               | genes not shown    |                                                             |                                                              |                                                              |                                                                   |                                                                   |                                                                   |                          |               |       |                         |                       |                                                                                                                             |
| 20                            | anxa13l            | 0.648130                                                    | 0.8049888                                                    | 0.9358175                                                    | 1.2379801                                                         | 0.97841723                                                        | 0                                                                 |                          |               | LG2   | 9610654                 | 9631137               | amplifiable by gPCR                                                                                                         |
| 19                            | apbb1ip            | 2.12954297                                                  | 1.586957                                                     | 2.2548448                                                    | 0.65081522                                                        | 2.18603472                                                        | 0.99518086                                                        |                          |               | LG24* | (6123408)               | (6161601)             | amplifiable by gPCR                                                                                                         |
| 18                            | abi1b              | 1.12497538                                                  | 1.7028843                                                    | 1.5228008                                                    | 1.12811567                                                        | 1.08264218                                                        | 0.88716093                                                        |                          |               | LG2   | 9651729                 | 9704711               | amplifiable by gPCR                                                                                                         |
| 17                            | acbd5b             | 0                                                           | 0                                                            | 0                                                            | 0                                                                 | 0                                                                 | 0                                                                 |                          |               | LG2   | 9707575                 | 9730294               | amplifiable by gPCR                                                                                                         |
|                               | genes not shown    |                                                             |                                                              |                                                              |                                                                   |                                                                   |                                                                   |                          |               |       |                         |                       |                                                                                                                             |
| 21                            | greb11 (2 1154822) | 5.16710144                                                  | 11.732225                                                    | 13.056112                                                    | 9.99294113                                                        | 14.0404565                                                        | 18.1102256                                                        |                          |               | LG2   | 11548229                | 11568413              | amplifiable by gPCR                                                                                                         |
|                               | greb11 (2 1155547) | 20.305225                                                   | 20.669535                                                    | 23.499861                                                    | 27.4091044                                                        | 21.9467422                                                        | 19.0759553                                                        |                          |               | LG2   | 11555478                | 11624584              | amplifiable by gPCR                                                                                                         |
| 22                            | abhd3              | 0                                                           | 0                                                            | 0                                                            | 0                                                                 | 0                                                                 | 0                                                                 |                          |               | LG2   | 11646751                | 11703651              | amplifiable by gPCR                                                                                                         |

^ The relative position of npc1 and egfra is reverse according to Zv9.

\* The position of this gene is located on LG24 according to Zv9.

**Table S5. DAVID functional annotation results.**

| Annotation Cluster   | Enrichment Score                                      | Count | P_Value  | Bonferroni | Cluster                                                               |
|----------------------|-------------------------------------------------------|-------|----------|------------|-----------------------------------------------------------------------|
| Annotation Cluster 1 | Enrichment Score: 1.11                                |       |          |            | Cluster 1                                                             |
| GOTERM_BP_FAT        | somitogenesis                                         | 3     | 2.80E-02 | 1.00E+00   | 1517339 hypothetical protein LOC100148408                             |
| GOTERM_BP_FAT        | segmentation                                          | 3     | 3.30E-02 | 1.00E+00   | 1537586 mind bomb                                                     |
| GOTERM_BP_FAT        | anterior/posterior pattern formation                  | 3     | 7.00E-02 | 1.00E+00   | 1526949 wingless-type MMTV integration site family, member 3 like     |
| GOTERM_BP_FAT        | embryonic development ending in birth or egg hatching | 3     | 8.60E-02 | 1.00E+00   |                                                                       |
| GOTERM_BP_FAT        | chordate embryonic development                        | 3     | 8.60E-02 | 1.00E+00   | Cluster2                                                              |
| GOTERM_BP_FAT        | regionalization                                       | 3     | 1.50E-01 | 1.00E+00   | 1546713 protein kinase, cAMP-dependent, catalytic, beta               |
| GOTERM_BP_FAT        | pattern specification process                         | 3     | 2.30E-01 | 1.00E+00   | 1526949 wingless-type MMTV integration site family, member 3 like     |
|                      |                                                       |       |          |            | 1526580 wingless-type MMTV integration site family, member 9A         |
| Annotation Cluster 2 | Enrichment Score: 1.03                                |       |          |            | Cluster 3                                                             |
| KEGG_PATHWAY         | Hedgehog signaling pathway                            | 3     | 3.50E-02 | 8.30E-01   | 1538660 si:ch211-241e1.5                                              |
| KEGG_PATHWAY         | Melanogenesis                                         | 3     | 1.20E-01 | 1.00E+00   | 1521138 zgc:113452                                                    |
| KEGG_PATHWAY         | Wnt signaling pathway                                 | 3     | 1.90E-01 | 1.00E+00   | 1533153 zgc:153115                                                    |
| Annotation Cluster 3 | Enrichment Score: 0.99                                |       |          |            | 1533539 zgc:171570                                                    |
| INTERPRO             | Zinc finger, C2H2-type/integrase, DNA-binding         | 5     | 4.90E-02 | 1.00E+00   | 1539599 zinc finger-like gene 2a                                      |
| SMART                | ZnF_C2H2                                              | 5     | 1.20E-01 | 9.90E-01   | Cluster 4                                                             |
| INTERPRO             | Zinc finger, C2H2-like                                | 5     | 1.30E-01 | 1.00E+00   | 1521068 epidermal growth factor receptor                              |
| INTERPRO             | Zinc finger, C2H2-type                                | 5     | 1.40E-01 | 1.00E+00   | 1518006 myosin light chain kinase family, member 4                    |
| Annotation Cluster 4 | Enrichment Score: 0.96                                |       |          |            | 1546713 protein kinase, cAMP-dependent, catalytic, beta               |
| GOTERM_BP_FAT        | protein amino acid phosphorylation                    | 5     | 8.80E-02 | 1.00E+00   | 1519322 receptor (TNFRSF)-interacting serine-threonine kinase 1, like |
| SP_PIR_KEYWORDS      | kinase                                                | 5     | 1.00E-01 | 1.00E+00   | 1518369 receptor-interacting serine-threonine kinase 2                |
| GOTERM_MF_FAT        | protein kinase activity                               | 5     | 1.10E-01 | 1.00E+00   | Cluster 5                                                             |
| INTERPRO             | Protein kinase, core                                  | 5     | 1.10E-01 | 1.00E+00   | 1518006 myosin light chain kinase family, member 4                    |
| GOTERM_BP_FAT        | phosphorylation                                       | 5     | 1.30E-01 | 1.00E+00   | 1546713 protein kinase, cAMP-dependent, catalytic, beta               |
| Annotation Cluster 5 | Enrichment Score: 0.85                                |       |          |            | 1519322 receptor (TNFRSF)-interacting serine-threonine kinase 1, like |
| INTERPRO             | Serine/threonine protein kinase, active site          | 4     | 1.20E-01 | 1.00E+00   | 1518369 receptor-interacting serine-threonine kinase 2                |
| GOTERM_MF_FAT        | protein serine/threonine kinase activity              | 4     | 1.30E-01 | 1.00E+00   | Cluster 6                                                             |
| INTERPRO             | Serine/threonine protein kinase-related               | 4     | 1.90E-01 | 1.00E+00   | 1525846 complement component 8, alpha polypeptide                     |
| Annotation Cluster 6 | Enrichment Score: 0.84                                |       |          |            | 1523183 complement component 8, beta polypeptide                      |
| SMART                | EGF                                                   | 3     | 1.20E-01 | 9.90E-01   | 1532880 protein C (inactivator of coagulation factors Va and VIIIa)   |
| INTERPRO             | EGF-like                                              | 3     | 1.20E-01 | 1.00E+00   | Cluster 7                                                             |
| INTERPRO             | EGF-like region, conserved site                       | 3     | 2.10E-01 | 1.00E+00   | 1546722 ADP-ribosylation factor 1                                     |
| Annotation Cluster 7 | Enrichment Score: 0.74                                |       |          |            | 1532072 RAB18B, member RAS oncogene family                            |
| GOTERM_MF_FAT        | ribonucleotide binding                                | 9     | 1.70E-01 | 1.00E+00   | 1521068 epidermal growth factor receptor                              |
| GOTERM_MF_FAT        | purine ribonucleotide binding                         | 9     | 1.70E-01 | 1.00E+00   | 1547472 eukaryotic translation initiation factor 4A, isoform 2        |
| GOTERM_MF_FAT        | purine nucleotide binding                             | 9     | 2.00E-01 | 1.00E+00   | 1518006 myosin light chain kinase family, member 4                    |
|                      |                                                       |       |          |            | 1546713 protein kinase, cAMP-dependent, catalytic, beta               |

|                       |                               |       |          |            |                                                                       |
|-----------------------|-------------------------------|-------|----------|------------|-----------------------------------------------------------------------|
| Annotation Cluster 8  | Enrichment Score: 0.41        | Count | P_Value  | Bonferroni | 1519322 receptor (TNFRSF)-interacting serine-threonine kinase 1, like |
| SP_PIR_KEYWORDS       | gtp-binding                   | 3     | 3.00E-01 | 1.00E+00   | 1518369 receptor-interacting serine-threonine kinase 2                |
| GOTERM_MF_FAT         | GTP binding                   | 3     | 4.30E-01 | 1.00E+00   | 1538421 zgc:112335                                                    |
| GOTERM_MF_FAT         | guanyl ribonucleotide binding | 3     | 4.30E-01 | 1.00E+00   |                                                                       |
| GOTERM_MF_FAT         | guanyl nucleotide binding     | 3     | 4.30E-01 | 1.00E+00   | Cluster 8                                                             |
| Annotation Cluster 9  | Enrichment Score: 0.36        | Count | P_Value  | Bonferroni | 1546722 ADP-ribosylation factor 1                                     |
| GOTERM_MF_FAT         | ATP binding                   | 6     | 4.00E-01 | 1.00E+00   | 1532072 RAB18B, member RAS oncogene family                            |
| GOTERM_MF_FAT         | adenyl ribonucleotide binding | 6     | 4.10E-01 | 1.00E+00   | 1538421 zgc:112335                                                    |
| GOTERM_MF_FAT         | adenyl nucleotide binding     | 6     | 4.50E-01 | 1.00E+00   | Cluster 9                                                             |
| GOTERM_MF_FAT         | purine nucleoside binding     | 6     | 4.50E-01 | 1.00E+00   | 1521068 epidermal growth factor receptor                              |
| GOTERM_MF_FAT         | nucleoside binding            | 6     | 4.50E-01 | 1.00E+00   | 1547472 eukaryotic translation initiation factor 4A, isoform 2        |
| Annotation Cluster 10 | Enrichment Score: 0.26        | Count | P_Value  | Bonferroni | 1518006 myosin light chain kinase family, member 4                    |
| GOTERM_MF_FAT         | metal ion binding             | 11    | 5.30E-01 | 1.00E+00   | 1546713 protein kinase, cAMP-dependent, catalytic, beta               |
| GOTERM_MF_FAT         | cation binding                | 11    | 5.50E-01 | 1.00E+00   | 1519322 receptor (TNFRSF)-interacting serine-threonine kinase 1, like |
| GOTERM_MF_FAT         | ion binding                   | 11    | 5.50E-01 | 1.00E+00   | 1518369 receptor-interacting serine-threonine kinase 2                |
|                       |                               |       |          |            | Cluster 10                                                            |
|                       |                               |       |          |            | 1537586 mind bomb                                                     |
|                       |                               |       |          |            | 1523243 phosphotriesterase related                                    |
|                       |                               |       |          |            | 1532880 protein C (inactivator of coagulation factors Va and VIIIa)   |
|                       |                               |       |          |            | 1516098 ring finger and CCCH-type zinc finger domains 1               |
|                       |                               |       |          |            | 1538660 si:ch211-241e1.5                                              |
|                       |                               |       |          |            | 1516089 ubiquitin specific peptidase 33                               |
|                       |                               |       |          |            | 1521138 zgc:113452                                                    |
|                       |                               |       |          |            | 1533153 zgc:153115                                                    |
|                       |                               |       |          |            | 1533539 zgc:171570                                                    |
|                       |                               |       |          |            | 1540346 zgc:66286                                                     |
|                       |                               |       |          |            | 1539599 zinc finger-like gene 2a                                      |

Table S6. List of primers used in this article.

| <b>primers for probe synthesis</b>  |              |                                             |
|-------------------------------------|--------------|---------------------------------------------|
| dystrophin (dmd)                    | sense        | GACCACCCAAAGATGGCAGA                        |
| dystrophin (dmd)                    | T7 antisense | TAATACGACTCACTATAGGGCTCCTTGCTGTGAGGGAAG     |
| fgf8a                               | sense        | GGACTTTACACATTTGAGCTGG                      |
| fgf8a                               | T7 antisense | TAATACGACTCACTATAGGAATCAAAGCAGAACGAGAGAGG   |
| foxcl1a                             | Sp6 sense    | GATTTAGGTGACACTATAGCAGTCTTCTTGACGACTGTTCTTC |
| foxcl1a                             | T7 antisense | TAATACGACTCACTATAGGTAATCGAAATACTGGTTTGGTC   |
| p53                                 | Sp6 sense    | GATTTAGGTGACACTATAGATGGCGCAAACGACAGCCA      |
| p53                                 | T7 antisense | TAATACGACTCACTATAGGGTTAATCAGAGTCGCTTCTTCC   |
| papc                                | sense        | GATCACTCGCCGCAATTCAC                        |
| papc                                | T7 antisense | TAATACGACTCACTATAGGGCAGCAACAGCACACAACCTC    |
| tcf15                               | sense        | GCTAGTGCTTGACGACAA                          |
| tcf15                               | T7 antisense | TAATACGACTCACTATAGGGCTCTCCCTGAGTGTCCT       |
| <b>primers for real-time RT-PCR</b> |              |                                             |
| mib/herc2                           | sense        | TGACCACCGGCAGGAATAAC                        |
| mib/herc2                           | antisense    | TGATTCCTGTAGGCGCACTG                        |
| mib zinc finger                     | sense        | CAGTGCGCCTACAGGAATCA                        |
| mib zinc finger                     | antisense    | TTCGACTTGCGACGAGACTC                        |
| mib/her2 -2                         | sense        | GAGTCTCGTCGCAAGTCGAA                        |
| mib/her2 -2                         | antisense    | CCTCCTTTGGCATCTTGAC                         |
| mib ank                             | sense        | AGACGCAGGAGTCTGGAGAC                        |
| mib ank                             | antisense    | CTTGTTGACAGCGATGTGCA                        |
| mib ring finger 2,3                 | sense        | GCAAGGAACAGGTTTCAGTCC                       |
| mib ring finger 2,3                 | antisense    | GTAAAGCAGGATTCGGCGCT                        |
| <b>Primers for genomic PCR</b>      |              |                                             |
| fih                                 | sense        | TGTAGGAGCCTGTTGTACTGA                       |
| fih                                 | antisense    | GAGTTTGTGGACAAGATGCA                        |
| vhl                                 | sense        | TAAGGGCTTAGCGCATGTTC                        |
| vhl                                 | antisense    | CGAGTTAAACGCGTAGATAG                        |
| mib exon1 GTP2F GTP4R               | sense        | TAGCCTAGACTCGCTAACTG                        |
| mib exon1 GTP2F GTP4R               | antisense    | GGTTCAGCCAGCTTTGAGAA                        |
| mib exon2 GTP5F GTP1R               | sense        | GGGACCTTTAAAGAGCCAAC                        |
| mib exon2 GTP5F GTP1R               | antisense    | GAGCAGACTTATCCACAAGG                        |
| mib exon8 and 9                     | sense        | GCATTCTTGCCCTTTCTGAG                        |
| mib exon8 and 9                     | antisense    | CTTGAAACATCCAGGCAGGT                        |

|                          |           |                          |
|--------------------------|-----------|--------------------------|
| mib exon 20 and 21       | sense     | TGGGGTAAGCGAAAACATTC     |
| mib exon 20 and 21       | antisense | TCCCATCTGCACACTGTCAT     |
| mib exon 22 (ta52b)      | sense     | GGTGTGTCTGGATCGTCTGA     |
| mib exon 22 (ta52b)      | antisense | GACAAGGAGAGCCTTGCAGA     |
| nn2000 genotyping        | sense     | CTGATGAAAAAGTGTGTGCAGAG  |
| nn2000 genotyping        | antisense | AAGGCGGAGAGAGAGGAAAG     |
| tfi91 genotyping (tfi91) | sense     | GCTCGTAAATGACCACCGGC     |
| tfi91 genotyping (tfi91) | antisense | CAACTGCAGTATTAGAAAACGCG  |
| foxcla                   | sense     | TATCAGTTCATCATGGAGCG     |
| foxcla                   | antisense | TCATGGCGTCCCTTCTTTTTA    |
| pthlra                   | sense     | TCCATGTTTATTTTCTACAG     |
| pthlra                   | antisense | CTGGACTGAGTTAAAGAG       |
| crhr2                    | sense     | TTCTTGTGTTTGTGTGTTTG     |
| crhr2                    | antisense | CTGAAAAGACTGAAGAAAC      |
| aqpla.1                  | sense     | TGCTTTTATTTGTGTGCAG      |
| aqpla.1                  | antisense | GGCTGTCAGATGTCC          |
| thocl                    | sense     | TTGCTGAAAGAAATCCCTC      |
| thocl                    | antisense | CCTCTGTGTTTCAGGATGTG     |
| uspl4                    | sense     | TGCATATGTCTGCGTC         |
| uspl4                    | antisense | CCAGGCTTCTTATTCGG        |
| rock1                    | sense     | CTTTATTTTATTTGTGTCTTCCAG |
| rock1                    | antisense | CTGTGAATGAAGCCCATG       |
| wacb                     | sense     | GTTTGTGTTGTTTTGTTTTCTAG  |
| wacb                     | antisense | GCCTTGAACATGCTTAATGA     |
| mkxb                     | sense     | ATGAACACGGCAGTC          |
| mkxb                     | antisense | GATGGAGCTCAAAACGTAC      |
| ptchd3ex                 | sense     | TGGCTCTGAATGGCAGAAGG     |
| ptchd3ex                 | antisense | CCCTCCAACACAGCAGAGAG     |
| gata6                    | sense     | TTCTGCGTGTGTCAG          |
| gata6                    | antisense | ATGCGCTTCTGAGGTT         |
| cables1                  | sense     | TCTGTCAATCTCTTTGCAG      |
| cables1                  | antisense | CTGTGTCAAGGCTACTC        |
| npc1                     | sense     | TCTGATGGCACAGATTTAATAG   |
| npc1                     | antisense | GGAAAAAGCACACACGA        |
| egfra                    | sense     | TGATCATGAAGTGTGGTGCT     |
| egfra                    | antisense | TGAGAAATGCCTTGCTCTGTT    |

|                 |           |                        |
|-----------------|-----------|------------------------|
| <i>acbd5b</i>   | sense     | GCATGGAAAGACTTGGGAAA   |
| <i>acbd5b</i>   | antisense | AATGGGTCAAGAGCATCCAA   |
| <i>apbb1ip</i>  | sense     | ATTTGTGGTTTGTGTGATAG   |
| <i>apbb1ip</i>  | antisense | CAGTCTGTAAGTCAGGGT     |
| <i>anxa13l</i>  | sense     | GCAAAAAGTTCTGGGACTGC   |
| <i>anxa13l</i>  | antisense | TCCTCCAACCTCCTCCAACAA  |
| <i>greb11a</i>  | sense     | ATCATGGGAAATTCATACGC   |
| <i>greb11a</i>  | antisense | GGACAAATAGCCTTGCTTAC   |
| <i>greb111b</i> | sense     | TCAAGTCATCTGTGCACA     |
| <i>greb111b</i> | antisense | GAAAATGTATTGGAACACCAAC |
| <i>abhd3</i>    | sense     | CGAAACCCTGGGTCAACTAC   |
| <i>abhd3</i>    | antisense | GCACGATCTGGCACTGTGTA   |
| <i>cldn1</i>    | sense     | GTCTTTCGTGGGCATGAAGT   |
| <i>cldn1</i>    | antisense | GAGCGCTGTCATGTGTGTTT   |
| <i>znfl2a</i>   | sense     | GGAGAATGAAGAGCCGAGTG   |
| <i>znfl2a</i>   | antisense | TGTGATCTCGAAGGCTTCCT   |
| <i>selt1a</i>   | sense     | GGCCTTATGTCTTCACAGC    |
| <i>selt1a</i>   | antisense | TGTGCTCCACTAAAGGCAGTT  |
| <i>dvl3a</i>    | sense     | GTCACCCTTTTGGACCTGAA   |
| <i>dvl3a</i>    | antisense | GGAAGATCATGGCAGTCGAT   |
| <i>ap2m1a</i>   | sense     | TCAACGCTGCTATGGTGTTT   |
| <i>ap2m1a</i>   | antisense | TCGCTGGGTCACTGGTATAA   |
| <i>abilb</i>    | sense     | CAAAGCCTACACCACCCAGT   |
| <i>abilb</i>    | antisense | AATTTGCCCTGCATTTTTT    |
| <i>rab18b</i>   | sense     | TCGTCATTTACCTTTGCAC    |
| <i>rab18b</i>   | antisense | ATGGTTCTGGATGCTGCTTT   |
| <i>mib</i>      | sense     | AACCGAGTGATGATGGAAGG   |
| <i>mib</i>      | antisense | TTAGCTCTGCAGCCTCACCT   |
| <i>yme111b</i>  | sense     | CCAGCTGAGTCACCTCATCA   |
| <i>yme111b</i>  | antisense | AAGTGGCCGGAGAGTGTA     |



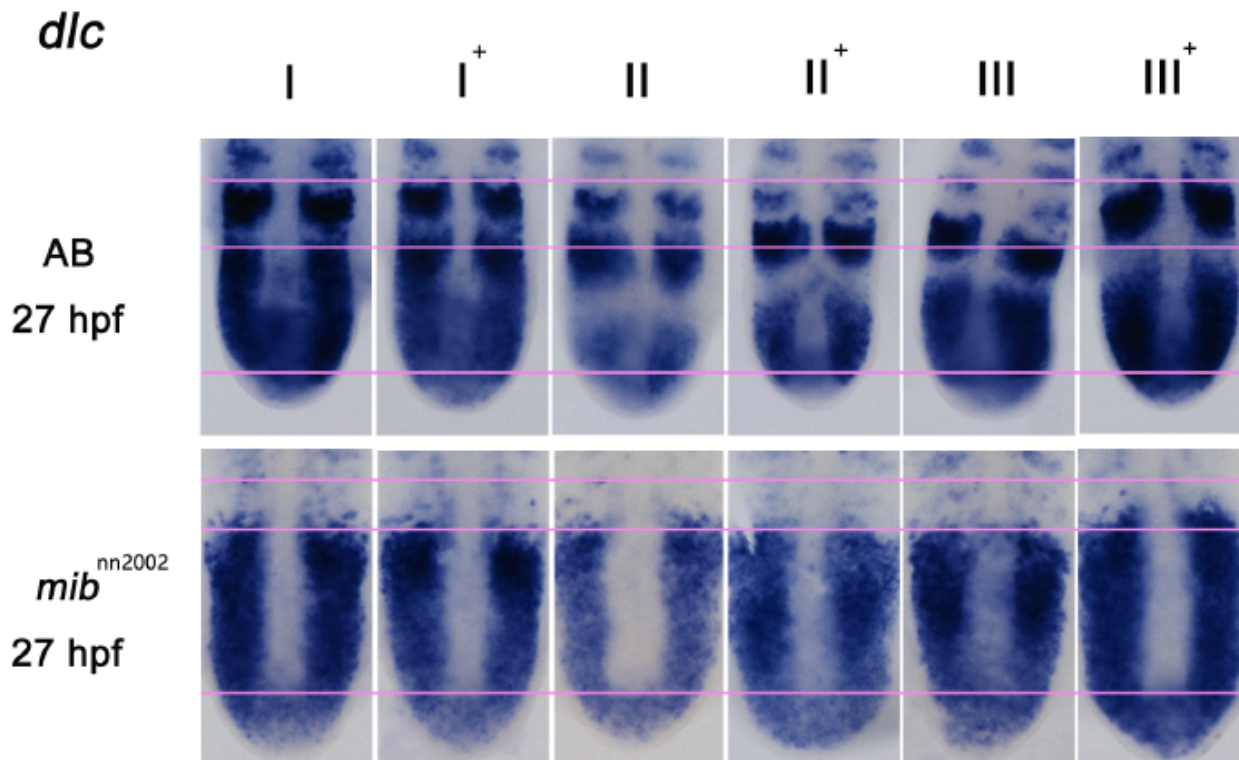

**Figure S1.** Cold-sensitive *dlc* cycling expression pattern in *mib*<sup>nn2002</sup> mutants. Embryos were raised at 22 °C before the desired stage (siblings are with 16 somites or at 27 hpf). Typical salt-and-pepper pattern shown in previous Notch-related mutants was observed in *mib*<sup>nn2002</sup> mutants. Although *dlc* was still cyclically expressed in the PSM of *mib*<sup>nn2002</sup> mutants, the sharp-striped pattern of *dlc* was not maintained in the region where somites are about to form.

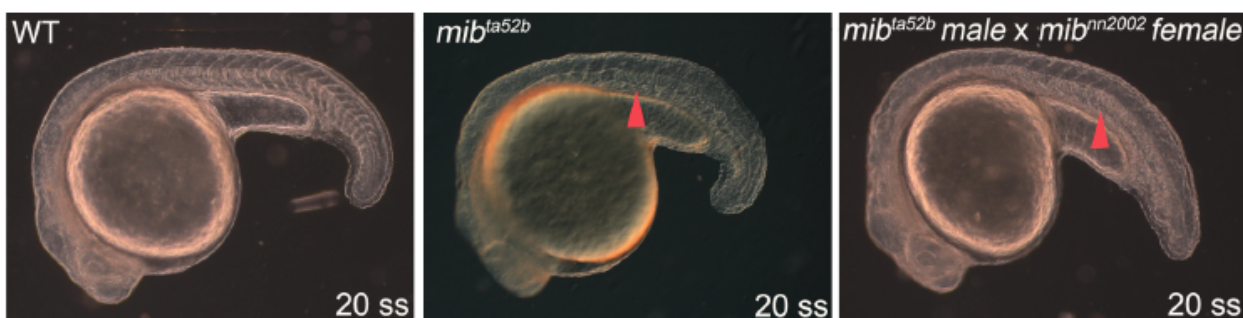

**Figure S2.** Somite phenotypes of homozygotes (*mib*<sup>ta52b</sup>/*mib*<sup>ta52b</sup>) and transheterozygotes (*mib*<sup>ta52b</sup>/*mib*<sup>nn2002</sup>). Embryos are in lateral view with head to left. While 22 visible somites were observed in the WT embryos (left panel) at 22 ss, only 3 and 7 visible somites were observed in *mib*<sup>ta52b</sup> homozygotes (middle panel) and transheterozygotes (*mib*<sup>ta52b</sup> ♂ x *mib*<sup>nn2002</sup> ♀, right panel), respectively.

male *mib*<sup>nn2002</sup> x  
female *mib*<sup>ta52b</sup>

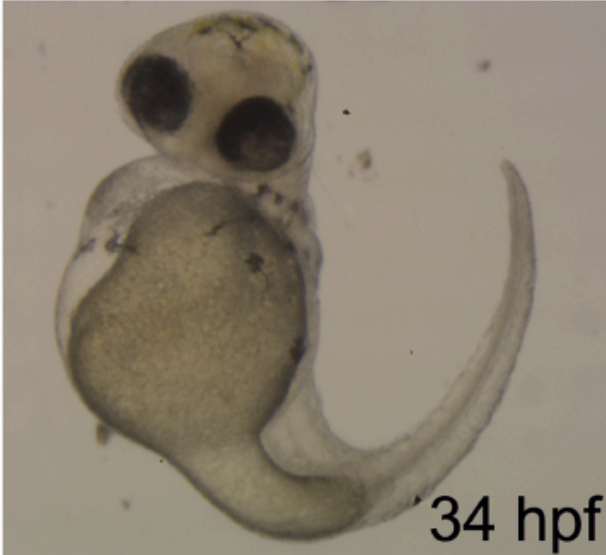

male *mib*<sup>ta52b</sup> x  
female *mib*<sup>nn2002</sup>

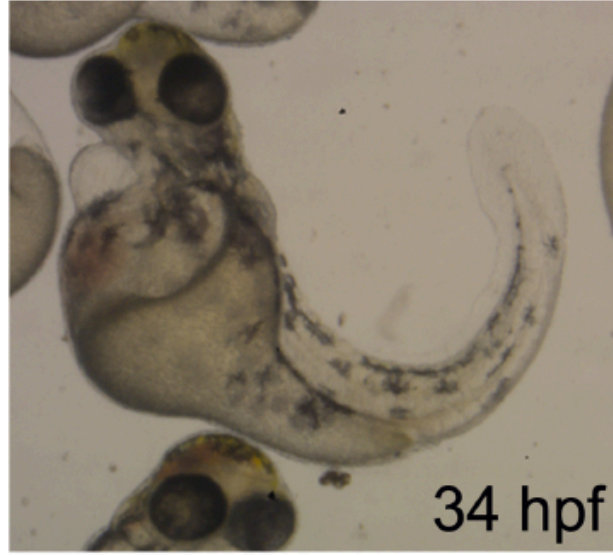

**Figure S3.** The maternal effect on phenotypes of transheterozygotes (*mib*<sup>ta52b</sup>/*mib*<sup>nn2002</sup>) at 34 hpf. The transheterozygotes have typical *mib* phenotype at 34 hpf, including less pigmentation and curly tail. Note that the transheterozygous embryos from incrosses of male *mib*<sup>nn2002</sup> carrier and female *mib*<sup>ta52b</sup> carrier (left) showed a more severe pigmentation phenotype (typical white tail phenotype of *ta52b* allele<sup>17</sup>) than those from incrosses of male *mib*<sup>ta52b</sup> carrier and female *mib*<sup>nn2002</sup> carrier (right).

## Acridine orange

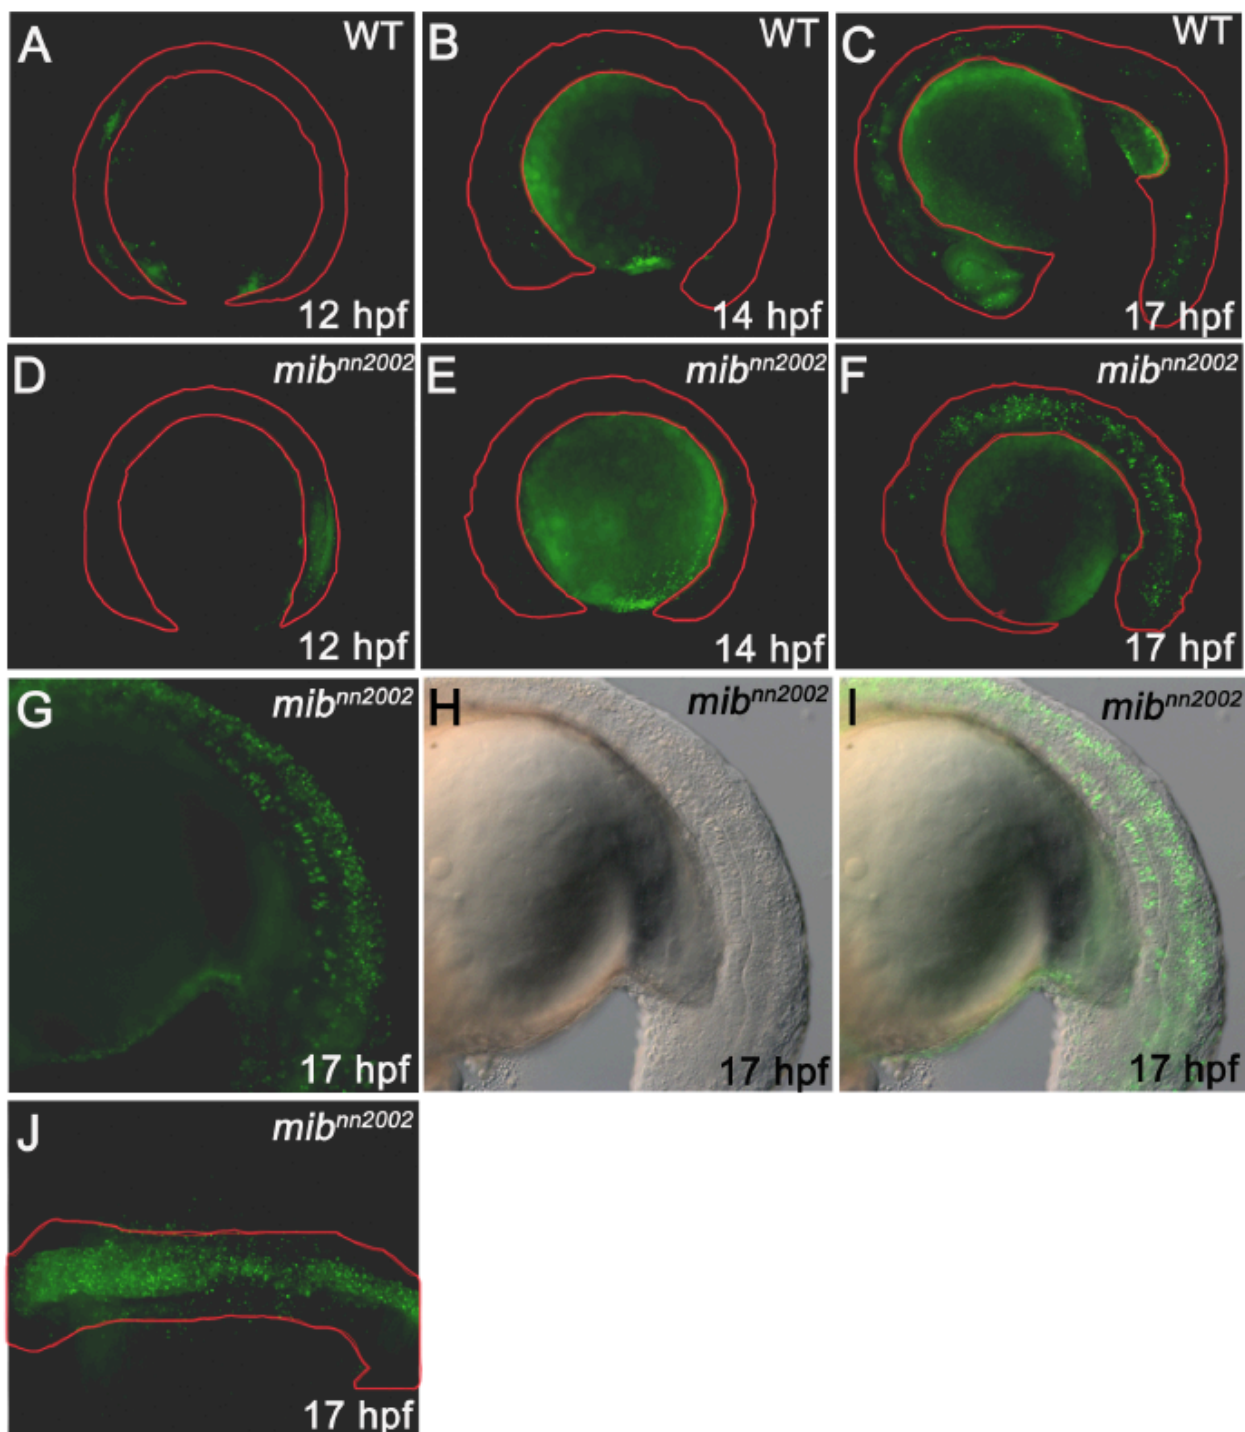

**Figure S4.** Cell death in *mib<sup>nn2002</sup>* mutants.

All the embryos are treated with acridine orange. A–C are wt embryos; D–J are *mib<sup>nn2002</sup>* homozygotes. A and D are at 12 hpf; B and E are at 14 hpf; C and F–J are at 17 hpf. A–I are lateral views with head toward left; J is dorsal view with head toward left. The contours of embryos are outlined by the red lines. (F) The amount of cell death is highly increased in 17 hpf *mib<sup>nn2002</sup>* homozygotes. Cell death was mainly located around (G–I) neural tube and notochord.

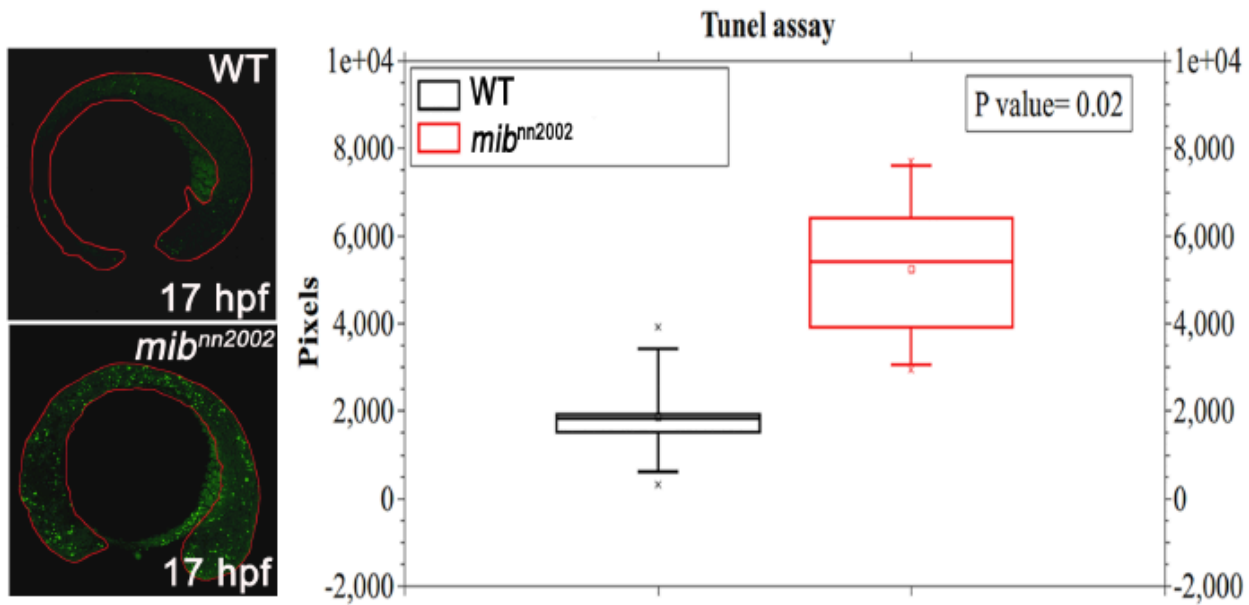

**Figure S5.** Apoptosis is highly increased in *mib<sup>nn2002</sup>* mutants. TUNEL assay was employed to study the apoptosis in wt embryos and *mib<sup>nn2002</sup>* homozygotes. The lateral view of embryos is shown with head to the left. Apoptosis is increased in *mib<sup>nn2002</sup>* homozygotes at 17 hpf. Analyzed and calculated by Image J, the fluorescent signal increases by 2~3-fold in *mib<sup>nn2002</sup>* homozygous embryos.

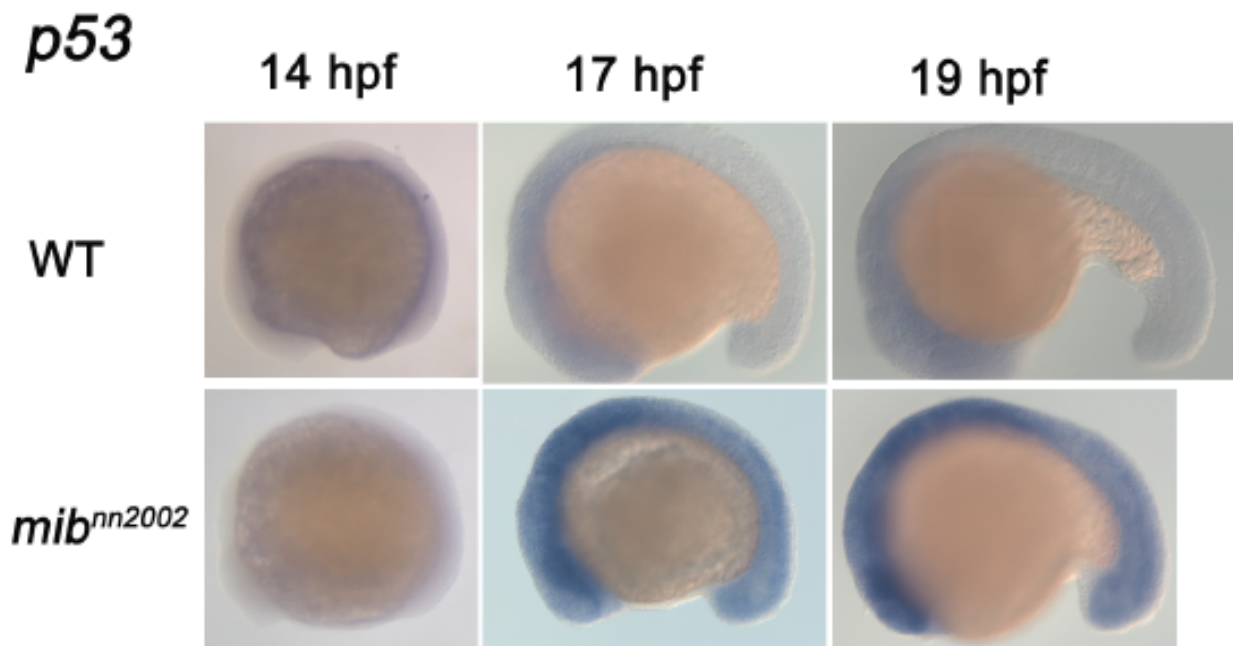

**Figure S6.** *p53* is highly up-regulated in *mib<sup>nn2002</sup>* mutants. *p53* WISH was performed in the wt embryos and *mib<sup>nn2002</sup>* homozygotes. Embryos are shown in lateral views with head to the left. The staining of *p53* was highly up-regulated in *mib<sup>nn2002</sup>* mutants compared to wt embryos.



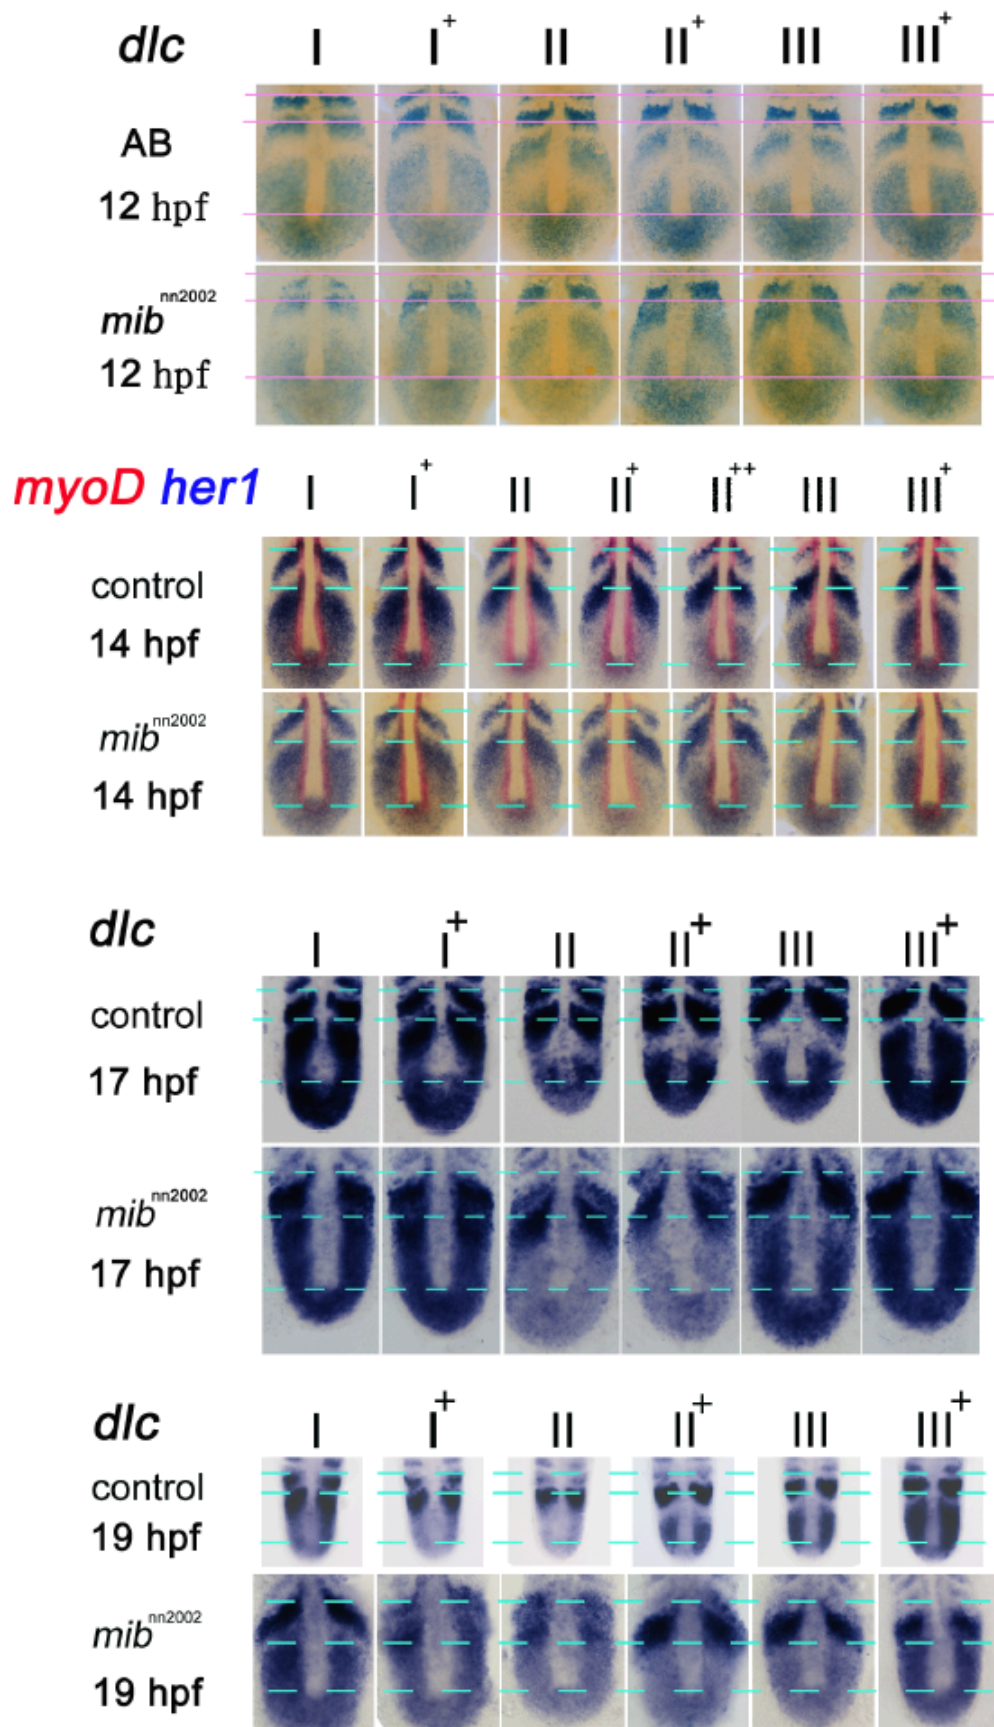

**Figure S7.** The expression of *dlc* in *mib<sup>nn2002</sup>* mutants during the stages of 12 hpf, 14 hpf, 17 hpf and 19 hpf at 28.5 °C. *dlc* WISH was performed in the wt embryos and *mib<sup>nn2002</sup>* homozygotes. Embryos are flat-mounted with head to the top. The cyclically *dlc* expression was detected in both wt embryos and mutants. No salt-and-pepper pattern was observed.

**A**

*mib<sup>nn2000</sup>*

```
//2650 GCCTGTGAGAACTGTGCAAGCCTGATGAAAAAGTGTGTGCAGTGAACGGGCCGTTGGTGGAG 2709
        A C E N C A S L M K K C V Q *
2710 CGCCGCACCCCCTTCGTTCTGTGCTGTGGAGGGAAAGGTATGGAGGATGCCACTGATGAT 2769
```

**B**

*mib<sup>nn2001</sup>*

```
//2770 GAGGACCTTACAGGGGGCTCTAACTCAATGGCAGGGGGGTGCGAGGATCTTCTCCAGCCC 2829
        E D L T G G S N S M A G G S Q D L L Q P
2830 AACAATCTGGCCCTAAGTTGGTTAGGAGAGGCTGTCGAGTGGCTCGCTGCGTTTTTCAGTG 1-38
        N N L A L S W L G E A V E W L A A F S V
39 CTGTGGGTTGAGTGCTGAAGTCAGAAAAGGCACAAACTTTCAGAATTATAAAGTAATTC 98
        L W V E C *
99-143 AGACATTTAAGAAGTTAGAAGGCTCTGGGGTCTGCAAACGCCCAGCCAGTGGAAATATCC 2866
```

**Figure S8.** The mutations of *mib<sup>nn2000</sup>* and *mib<sup>nn2001</sup>* alleles. This panel shows the mutations of *mib<sup>nn2000</sup>* and *mib<sup>nn2001</sup>* in nucleotide sequences and amino acids. *mib<sup>nn2000</sup>* mutation is a nonsense point mutation that leads to a truncated protein without ring finger domain 3 (RF3). *mib<sup>nn2001</sup>* is a nonsense mutation caused by a failure to splice a 143 bp long intron (the underlined nucleotides) out from *mib* mRNA. The stop coden is marked by blue asterisks.

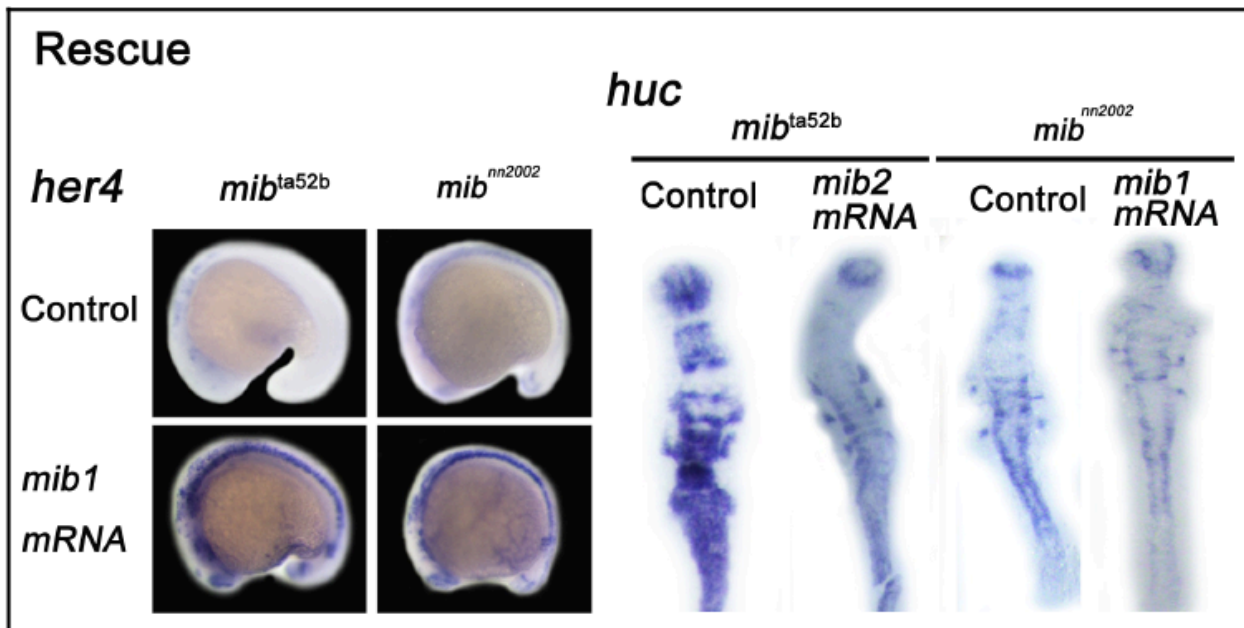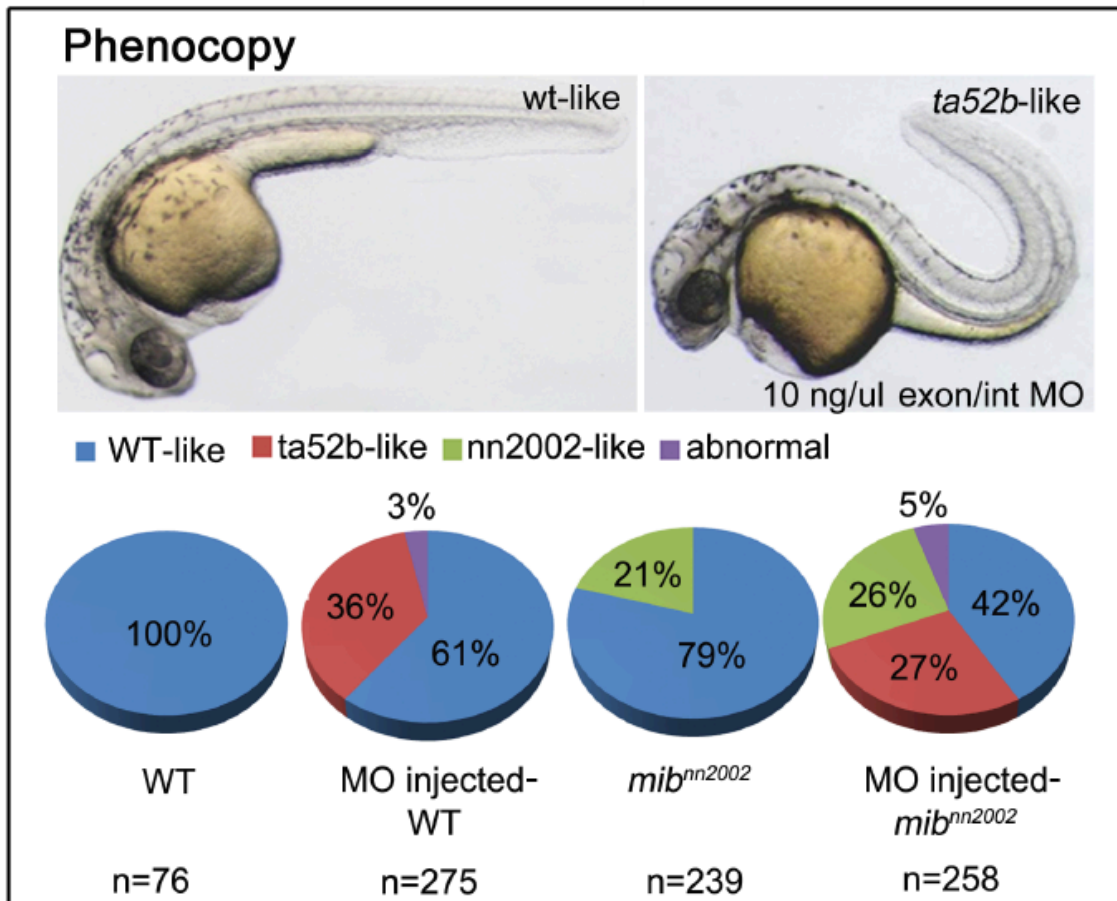

**Figure S9.** The rescue and phenocopy of *mib*<sup>nn2002</sup> phenotypes.

In rescue experiments, *her4* WISH was carried out in the *mib* mRNA (1 ng/μl) injected *mib*<sup>ta52b</sup> and *mib*<sup>nn2002</sup> embryos. 19 hpf embryos in lateral views with head toward left were shown. The expression of *her4* was rescued (increased) by *mib* mRNA in *mib*<sup>ta52b</sup> and *mib*<sup>nn2002</sup> homozygotes. *huc* WISH was carried out in the *mib2* mRNA (1 ng/μl) injected *mib*<sup>ta52b</sup> and *mib* mRNA (1 ng/μl) injected *mib*<sup>nn2002</sup> embryos. 19 hpf embryos in flat mount with head toward top were shown. *huc* was rescued (decreased) by *mib2* mRNA in *mib*<sup>ta52b</sup> and *mib* mRNA in *mib*<sup>nn2002</sup> homozygotes.

In phenocopy experiments, *mib* morpholino injected-wt and -*mib*<sup>nn2002</sup> embryos were examined. Morpholino can successfully convert 36% of wt and 27% *mib*<sup>nn2002</sup> siblings into embryos that exhibit typical *mib* phenotypes (ta52b-like). However, the morpholino failed to convert the *mib*<sup>nn2002</sup> homozygous embryos into embryos having typical *mib* phenotypes. The ratio of embryos carried *mib*<sup>nn2002</sup> phenotype is 21% without injection and 26% with injection. The ratio of embryos that exhibited *mib*<sup>nn2002</sup> phenotypes was not reduced with the injection of *mib* morpholino.

## A scaffold3540

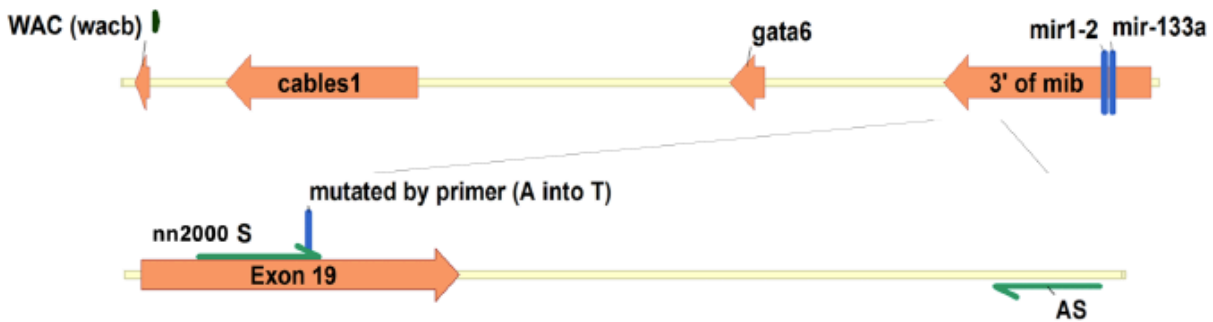

## B scaffold3504

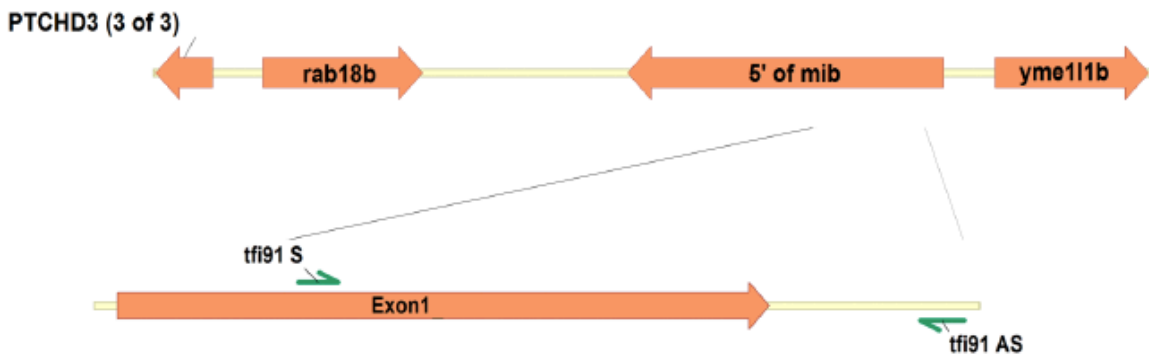

## C

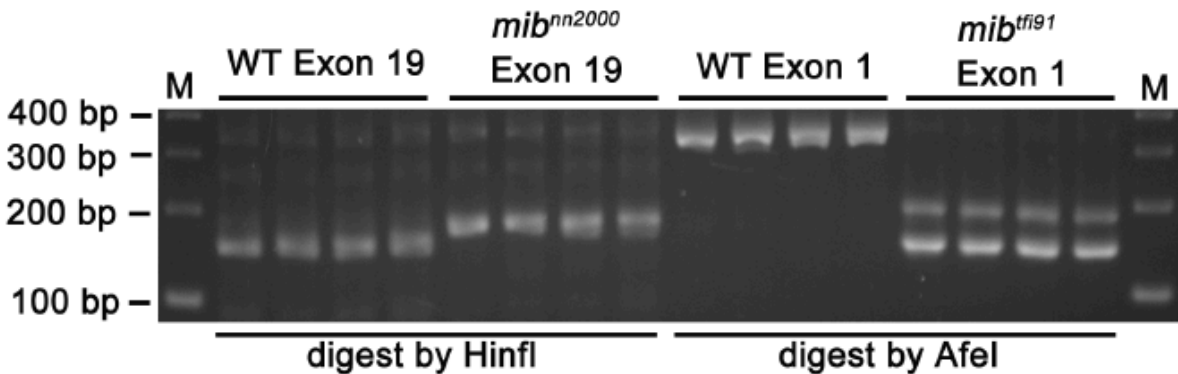

**Figure S10.** The continuity test of scaffold 3504 and scaffold 3540.

Panels A and B illustrate the design of (A) *mib<sup>nn2000</sup>* and (B) *mib<sup>tfi91</sup>* genotyping primers related to scaffolds 3540 and 3504, respectively. The *mib<sup>nn2000</sup>* genotyping PCR products of wt and *mib<sup>nn2000</sup>* are 173 bp long. *HinI* cutting site was created by using CTGATGAAAAAGTGTGTGCAGAG instead of CTGATGAAAAAGTGTGTGCAGTG. Only the wt PCR products will be recognized and digested into fragments of 152 bp and 21 bp long. The *mib<sup>tfi91</sup>* genotyping PCR products of wt and *mib<sup>tfi91</sup>* are 335 bp long. Only the *mib<sup>tfi91</sup>* PCR products will be recognized and digested by *AfeI* into fragments of 189 bp and 146 bp long. The genotyping results were shown in panel C. The digested PCR products were analyzed on 3% agarose gel. The digested PCR products of *mib<sup>nn2000</sup>* and *mib<sup>tfi91</sup>* can be easily distinguished from those of wt with the expected size mentioned above.



## Supplementary File 11

>Zv9\_scaffold3504 dna:scaffold scaffold:Zv9:Zv9\_scaffold3504:1:82506:1  
(encode 5' of mib genomic sequence)

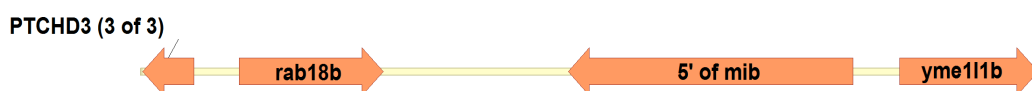

Loci (4 total)

*PTCHD3* (3 of 3) Start: 18 End: 4706 (Complementary)

*rab18b* Start: 8883 End: 22055

5' of *mib* Start: 38977 End: 65063 (Complementary)

*yme111b* Start: 69307 End: 82031

#Genomic sequence was compared with mib mRNA sequence (NM\_173286.3)

# **Yellow color**: Indicate the site of CpG islet

# **Red color**: Indicate the site of Exons

# **Blue color**: Indicate the site of introns

# **Green color**: Indicate the site of polymorphism

# **ATG**: indicate translation start site

# **A←** : The variation on mRNA is A

# **→G**: The variation on chromosome is G

CpG islet CTGCTGTTTACAGACCCGAGCGTGCGTTTGTTCGAGCATGAAGGACTGCGCTTCTTCACCTACGCCA  
TTCATTTCAGGAATTATATCTGAACTCGAGTAAACCAGAAGGTTTAAATCAAAGTGCTTCAGCTGGACTGT  
TTTTGCAAACGCTTTTCTGCACAGACATTCTGAACCGCTCGCGCGAAGTTGGACCATCTGTTGAACGT  
TTGCGAGCGCACCGCAAAGTTCTCAACGCGTTTATTTTTTAAACATTTAATCGCAAACAACACTGTTGTTG  
TTTCTAAAGCGAACGTTTTTGTGCGTTTATGCTAACGCCAAGCAACTTTGGAGAGGTTAGCTATAGCT  
GGTTAGCCTAGACTCGCTAACTGGCCTCTGCTAAAAGGGCCGTTAGTGACCTAAACGTATTGTTTTTCTA  
CATTTATTCATAACGTGTAATAATAACAACACTACAAAGTTGTTTTCTAATAATCTCTGTACGTTATATTT  
CACTAAAACAGTTGCATTTATGAGTCGACAACCTTGAGCAGTTGTGAAAAGCATTAGCACTCCAAAAAAC  
TTCAGTTAAACATTTTCTTAAGGAATTAACGTAAGCATTCTCTGTGTTTTGCTATACAGCAAGAGTG

Mib Exon 1 ACCTCCATCATTGCCATATGTAAGACGAACCAAGTCCTTTTAAAACCAATATTCTCAAAGCTGGCTGAA  
CCGCCAGCTAAAAGTAACTTAAATCGCAACTTTTGCTCGTAAATGACCACCGGCAGGAATAACCGAGTGA  
TGATGGAAGGAGTGGGTGCTCGAGTTATCCGCGGGCCTGACTGGAAGTGGGGGAAGCAGGACGGCGGAGA

AGGGCATGTGGGCACCGTCAGGAGCTTCGAGAGCCCCGGAGGAGGTGGTGGTGGTGTGGGATAACGGCACC  
GCCGCCAATTACCGCTGCTCCGGGGCTTATGATGTGAGGATATTGGACAGTGCGCCTACAGGTGAGGCTG A←→G  
CAGAGCTAATTGACTTCATCTCTCACCTTATCTAAACATCAGCTAACTAATTTATTAGAATAAAAAACACGC  
GTTTCTAATACTGCAGTTGAGGTGTATTTGTATTTTGTGAACTGTATAATGTATAATAAAGTGCTAGTTC  
ACACTTTAATAATAATTGCAAATTTAATCCATTGCCATTGTCATTTCAGTCATTTTTTAAAGTCCCTT  
TATTAATCTGGGGTCGCCACAGCGAAATGAACCGCAACTTATCCAGCAAGTTTTTACGCAGCGGATGCC  
CTTCCAGCCGCAACCCATCTCTGGGAAACATCCACACACACTCATACTATGGACAATTTAGCCTAC  
CCAATTCACTTATACCGCATGTCTTTGGACTATGGGGGAAACCAGAGGAAACCCACACGAAGGCAGGGAG  
AACATGCAAACCTCCACACAGAAACGCCAACTGAGCCGAGGTTGCAACCAGCGACCTTCTTGCTGTGAGGC  
GACAACCTACTGCGCCACTGCCATCCATCTGCGGTCCATCAAATATAAATTTTACATAACATAATTAAT  
GTAATTTGAGGATCCTTCCACTGAAATTTCTTCACGCAAAATGTTTGCTTCAAATGCGATCTTAAATCA  
GTATGAATGGTTTCATCCAAGTCCACCCTTTCTGATGTGAATATTGCATTTTATGCTTTATGTAATGC  
TTAGAGTGCTAGTTCATCCTAAAATCAGATGTAATTGAGCGTCACATGAAATGTTTGAAATAAATGTCTT  
ATGCATTCGTAATGACATGGGGTAAGTAAATGTTAACTTATGTTTATCTCAAATATTTTATGTGATGCTC  
AAGAATGAACCTGATTGGTTCTTGCGGAGGCTCAGATGTGAGGTGTGACACAACAATGAACCTCATTAG  
TTCTTGCTCATGATTGAGTTAAAGTCTAATATTTTACAGTCTATCAAAGTCTATTAATGAAATATGAGCT  
CAACTCTTCAGAATACTTTGATTAACTGCACAATTCATATAGATTTAGTTTTTTTTTTTTTATCTCTTTAA  
AAAGTTTTGGATGAACTGACTATGCAACAAATATTAGATTTCTCACACACTCACGCACAAAAAGTCTGCA  
TTGTGATATGATATATGTACAGTAAGAATAATGTTTTGTTTACCCCCACACACACACACACACACACA  
TACAAAATAAGAAAACCTCTCATTATTATTCCTCTGTTTCCAAAACCTGATTGAGTTTCTTTTTTCCATTGA  
CTTAAATTGATATTTTGAAGAATGTTGAAAACCTGCTAGCAATTGGCTTTATTTTTTTCTCTACCATGAAT  
TTCTGTGGGTACCATTTTCCAAAATCTTCAAACCTCTATTTTTTTTAAATGTTCAATGTGACAAAATAG  
TAATAAAAAAACGTGAAGTTTTAGAACCATGTGGGTGAGTACAGTTTAAATTGTGAACGTCCCTTTA  
ATTGACATTAAGGATCAATACATTATGAATAATATACAAATGTGTTTGTATGCATTAAGGGGCCAT  
GAAATTAATAAACGCTTTTTAGATGTTAGTATCAGTATTGTTTATTTTAGGATATTTATAATCTAGTG  
TGCTCCAAACCCGTGGCGAAATTCGCGTTTAGAAGATATAAAACCGATATCAACATGTCATTTTATTCAC  
GTCACCTCATACTACAGTTTCTCATCAAATCATAACCAATCGAATGCTCTCTAGTATCTGACATGCCCGG  
CCACCTTCAAGATGCTTCTCTTTGGCTGCGTCCAAAACCGCTACTACTCAGTACAGCATTGAAATTTAA  
ACGTACTACTCGGTCTAGAGCTGCACGATTCTGGCTAAAATGAGAATCGCGATTTTTTTTTTTTGGCTTAA  
AATAAAGATCACGATATTCTCACGATTCTGTAGATGTAAATTAAGGTATGGTAAAAACAAACATATGGC  
ACAACATCGATAATAATATATGTGTAGGTCTACTGGTGTCTATAAATAATTCTATTCTACTTATAATAA  
TTCTGATGTTGAATTATTATGTTTGGGATTATATGCTTGCAATAAGACAATTTTATTCACTGGTAAAATC  
AGACATTTGCCATTATCAGATTATATTCAGCAATATATAGGCTAGAGTAGTTATACTGACATGTAAACA  
TTTATTTTCATGCGCAACTGTGTGTTGCGTATGAAAGAGAAAACACATCAAATGCTTGCCGCAATCATAA  
CTCTAAAATGCGATATGATCATTTAAATGAAGTGCACACTTTGCGTTTCATTCGACTGCTAAGTGCTGT  
TCATACTTCGCGTGGGCTCCCAAACGATCACTCTGTGCCACAACTGAATATTATTTACATCTGTATTA  
CCTGTTACTCGCAACATATGCAGGTTCTGTTCACTAAAGTAGACGTGCGCGTCTATCATTAAGTAGAGTA  
CGCATGCGCCCTCGCTGTGATAACAGCTCATGGTAAGTAGCTCATGTACGTGTCATTTCCCGTTGCGGA

AAACATAATTATATTAAGAGAAAAATGACATTTTTAGGTGAATTATACCTTATAAATACAGGTGTCAATG  
TCACTGAGCAACGTGTGTGAAACAATGAAAAGACTTGTGCAGCCGCCTTTTCTTCTCTCTCTGAACATGAA  
AATATGATTGATAGAATCGTAGAAATGCTGGATTAAGATCGTCTGGGGGGTGAATCGAGATCGCAATCT  
TTTAACGATTAATTGTGCAGCTCTAACTCGGCCGTTAGAAAAGTACAATCTATACAGTATGAATGTGAAA  
AGTATGAATGGAATTTGGACGAACTACATCCTGACCTACCTGCGTCAGTTGCGTCGCGTCAGTCCCATTC  
ATGTTTTGGTTGAGATCGCGTCAAACATCGAATAAAAAATGCACATTTCAAAGCACTTAATGGGACCTTTA  
AAGAGCCAACCTTAAGTTTAAACAGGTGGAAGTCAACCCATTAAATATGAATCTAATTGCAATGTTCCAGG  
AATCAAGCATGATGGCACCATGTGTGACACCTGTGCGCAGCAGCCATCATTGGAATCCGATGGAAATGT  
GCAGAGTGCACCAACTACGACCTCTGTACCACCTGTTACCATGGCGACAAGCACACCCTGCGCCACAGGT  
TTTACCGCATACCACCCCTGGCAGTGAAAGGTGAGTGTGGCGTTTTCTCCATGTGCTCTTCACTCCTTGT  
GGATAAGTCTGCTCTGGCCGGTTTTACACAGCTATGGACCCTTTTACATTTCTGGGGTTTTCTGAAGTC  
GTGTTAGTTTGGTAAACTTAAATGTTTGTGCACACCGGGACGCTTTTTGCTTGCCTTTACCGTCAACGTT  
TAACACCTCGTGAATAAAGGGCGCAATGTGACCGTACACACCAACGCGCAAAACGGCAAGCGCAA  
AAGCGTCATTTTTTTAAGAAACGCTTCATGCTCGTTTTTTTTGTTTTGATACACTGCGTCAAAATCTTCTC  
CACCAATCAGATTGGCACTTTTGTTCACGTGCACGGAGCTGTTAAAGTTACAGTGAACAACACTTGGAGG  
CGCTCAAGCGCAGCTGTCAATGCAAGCGCACATAGAAGAAGACGCCAGAGGGGATATGAACATTCAGCT  
GCTTATTGCTCTCTAAACAATAATCATTTCTTCATCGCTAGAGCTGGAGTTGCTGCTTGAACCATCCATG  
CTTGTTCGAGTCACCAGTAACTTTAACAACAGGCATATGAACTTCCTCTCTTCTCTTTTGTGTTAT  
AAGCGGGGTGTCAGAAGCTTACAGTTGTTTAGCGCCATCTAACATCAAGGAGTGATTTTGCATACTCTTC  
TGCTTGACGCCAGTAAAAATTGCTTGGGTTTGAATCCGGAAAAAAGGTCTCGTGAAACTCTGACGATGAA  
CGCAAACGAAAGCGTCTGGTGTGTACGAGCACTAGGCCGGTTTTCTTGAACTATCCTCAGGCACAATT  
GTGCCCTTTCCCCTTGACCTGCACTCAGCTGCATTATTTACCTTCCGAGCCTGAGCGCGCTTGCCTCGT  
TGATAATGCGACTGTTTCAAGTAAACAGAAGAGAAGATTGGAGTAGAGATTGCTTTAGTTGTATTGTTTTG  
TATTATTTTAAATGTTTGTGATGCTATGACAAACAGTCAAATATTTTGTGAAACAGATCCTAAACTTTT  
GACGCTCATAAATGTTTCAAGTCAATGTGCTGCTCGTATTAAGAGGGATCCTGGGATTTTTAACGAC  
TACAGAGAGTCAGGACCTCGGTTTAACTCTCACACCCCATTCACACGGGGTGTGACGCTCAACGCTTAC  
TATTCATTTGAATGGGTGACGTGAGCGTTGCCGAAGTGCATAGTGGATCCGTCGGCTCCGCTTCAGAG  
GCGTTGCTCAGTGCAGAAGTTGGGACTAGCTCAACTTTTCAAGTGCCGACAGATCGCTATATGCAAATAC  
ACCAGCTAGACAGTGGCCTATTGCTGACTGAATTTTCAATGGCTGACGCTGCTATGATGATCGCTTTAGCC  
CCAACCTCAGACACGACTTCAGTCAAGCGTTGACGCTGAAGCCCGTGTGAATGGGGCGTCATCCGAAAGA  
CTTCGCTCACTGAGAAGTATAGAGTCCCGTCACTATACTGGGGCATTAGGACCAACACAGACCACAGGT  
TGGACGCCCCCTGCTGGCCTCACAAACACCACTTCCAGCAGCAACCTAGCTTTCCCATGTGGTCTCCCAT  
CCAGGTACTGACCAGGCACAGCCCTGCTTAGCTTTCAGTGGGTGACCATGTGAGAGTTGCAGAGAGCTAGC  
TGCCGGCTGATTGATATGTTGAGCTATCTTATGCTGCTTTGACCCAATCTACATCGTAAAAGTGTATAG  
AAATCAAGATAAATAAGATCGCAAGCAAGATCTCAATCGCAGCAAGTCTTTGGTCATGATTAGGTTTGT  
TTTTACCTTATTTTATGAAGCTAGATAAACATTTGTTTTACATTTAGTAATATTGTGAGAGAAGCTGCTG  
TTTTAGTTGTGATCTGCTGTCTATTTCTTTTTAATGGCTTGGGTAACGCTCTCCATATGGCAAGGCTATT  
ATGAAGTCTAGCAGTTGTTTAGACGTCAGTGGCAGCCATCCGTTACTGCCCTAAACATGAGCTCAAG

Mib exon 2

CAAACAATAGGTGAGCTCAACAGCTGGTCTCCTTTCAACTGAGTCTGACTCTATTTCCCCAGTCAGATTG  
GAGAGTGAAGTGCAGCACACAAAGACAGTGGCCTTTTTTTTTTAAACTGGGTGTTTCTCTGGCAGCTGCT  
GTGGTTTTCCAGCTGCTTTAAGACACATGTGATCTTAATACAACCAGAATAAAAATTCTCTAGTGCTTTTAT  
TTAATTTTTTCTTGCTCTGAAGTTTTTTAATTTTTTTTTAATTTTGCTATTTAAAGGCAAAATTGTCTTTT  
TAAATACAAAAAACCCACCTGAACAGTGTATATATTTTACTGGCTTATACATTTGCATTATCCTAAA  
TGTTTTGAAGAATGTTCAAGTCAAGAGAAAAAGCTTTCTCCTTACTGACGGCTGTTGCAATTTCAAGCC

Mib exon 3

AATAATTTTAGTTTTGTACGTTTCATATTTCTTTTTTTTGTACTTCAATGTGTTTGTCTCAGAGTTCTTC  
TGGAGTCTCGTCGCAAGTCGAAGAAGATCACAGCCCGCGGCATCTTTCAGGAGGACGAGTGGTGCAGG  
GGTGGATTGGCAATGGGAGGATCAGGATGGCGGGAATGGAAGAAGAGGGAAGGTAATGCCTCGACACGTC  
TGACTATGCTCACCTTCTGTGCTCATCTTTTATTACATGAAAAACATTCCTCTTATCACGTGCATGCAG  
TGTTTTGTGCTCAATTTAATTTCAACGTTGTTTTTATTGTTTTTAATTATGATACAAAACCCAGAAAACA  
ATACAAAATATTAACCTGTATAATATTTCAGAATTTACTTTCCACAGCAACATTATTTAAACAGAAATA  
GCATTTAAAAATAAGTTTAAAAATAAACACAATGCTATTATATAAAAAATAAAATTAAGAGTAAATAAATAC  
CTAAAGAGCCCTATTATGTTTTTTTTTTTTTTTATATTTCCCTTTCATTTCAGTGTGTAACACAGCTGTAA  
GTGAATGAAAACATCCAGCTGAGGGTTAACTCTGAAAGTGCACCTTGCTTAAAAATGCAGATTTTTTTAA  
ATAAAAGATTTGACTTAGTCAAAATCTTTTAAATGTCGTTTAAATGATTTGTTGTTCACTCGGATATTTTG  
CCTGTTTTGTATTGACGTCAACACAAAACAATACCAAATATGTTTTGTGCCGGATTTCGGCAAAACGTGAAC  
GTGCCTTTCCCTTCAAACACTTGCTTCGTGCAGGTGTGGGACTGATCATGACTGAAGATGAGTGAACATT  
AATAAGTAAATGTTCTGGTGATTAATGAAATAATCTACCCTGCAACGGGGGATTTCGTCCGGCTGTTGTTT  
GAATTCAGTGTATGGGACTTTGTCAGAGCTTGACGGGTACTTTACAGTATACAGTTCATGGATCAGTTT  
CTTCTCCATTACAAAATGTAAGTAAGTGCGAATAAAATTTGCTGCCTCATTTTCTCTAGCTTGCAAAATG  
TGTATTTAGTCGGCGCAATAGCCTAGTAGTTAGCGCGCCGACATATGTTGCAATAGCACGTCAGGGCGTC  
GCGAGTTCGAATCCCGGCTCGACGACATTTCCCTACCCCTCTCTCTCTCCCACTTCGCTTCTGTCTCA  
ATACTGTCTATCTAATAAAAGGCCAAAAAGGCCAAAAATAAAATCTAAAAAATAAAAAATGTGTATTTAA  
TTGTAATGTTACTTGTAATGGCTCGTCGTGGCTTGTAAATGTATCTCGTTAACTCTTTATATTTCTTATCAA  
ATCTAAAACCATGTTGAAAAGGCAATGTGTGTCTCTTTGTTTACAGTTTTAAATGCGTTTGTAAAGCTCAC  
GATCCTCTGCCGTTTGTCAATGCATCAGCTGTTTCTCACAGTGTAGCAAAGTTTCAAAAATAGTTAATCT  
TTAAACTGTGTGGATTACTACTGTGTGTCGTGGTTAACAATAAAGCAATTTGCTGGTGTAAACTGCAT  
TGCTTTAATGCACTCTACGTTGGGCTCACACATACACTCTGCACTCTGACTACTTCTACAATGTTGATG  
AGTCGTGGGGCATTTCATCTGTCTCGTGCTGAACGCAGTCGACCAATCAAAACAGACTTGGTCATCGG  
ACCAACTATCGCAAATTATCATCGTGCTAAGGAGGGGTTTGGGAACAAATGATGGGGGGTGTGGCGAAC  
TGAAGATTTTGAAGGGCACAATCTATCCAAGACTAAAAAGGCATGTTGAGGTTGAGGTTGAGCCCAT  
GTGTGCACGTGCCTGAGGTCATTTATGTATTTCTTACACAAAATTTCTTTTTTCTTAAATTAATTGCATT  
TTTGAGGTTGTAAACATGCTCGAAAACGACAAAACCTTGCACACACATTAGAAGTGGCTAAAAATTTTGA  
TATGGTTTCGGAAGAGGGTGTGGCAAAACACACAATAAACATGTCAATACTTGCAAAAAGTCTCTGAGGC  
CATGTCTACGCTAATCACGTCCACTTCACGTCCACACTGTCGTTTCTATTTCATTTTCCAAAACATTGTCA  
TTCCCACTGAAACGACTATAAATGCTTTCAACCTGTACTGTGCATGCATGAAACTTAAGACGCTTCGGCA  
CGCGTCATTTCCGCCTGACGTTTATTTTCTTTCCGGCTCTTTGAAACGTTACGGCAAAATGTCAAGGAAA

AGCACAGAGTTTTTTTTAATGGACTGACAATGAAGTAGAGTTGCTGCTTCGAGTAGAGTGAAAAATGTAGAC  
TGGGACGTGCCAAAACAAATACGTGATATACTAGACCGCTTTAAAGAACAGTATTCTGCTGCTGATGCT  
GCTTACCCCTCACAGTAAGGACGACATCACTAAAATCAGAATCACAACAAAATTAAGTAAACGAATTAGT  
AACATGACTGTACATGACAAAAACGCGTCCGTGTCTACAGTCTACACTACGACACGAAAAATGGCGTTTT  
CAAAATATCCACTTTGGAGAGCGTTTTTCAAAAAGATACGTTTTTGTTCCTAAAAACACGTCTCAGTGT  
GGACGGATGAACACGCATTAAGGCTGATTTATACTTCTGCGTCAAACGCCGGCGTATGCTACGGCGCTGA  
CGCATAGCCATGGCCGTGGCGTTCGCTGACATGCACCTCTCAAAAAATGTAACCTACACGTGCAACGACG  
CGTAGCGCAAGCTCTGTGATTGGTCGGCTTGGTAGCACTGACGAGTCTGGGCGGGACCGAGAGCCGCGCG  
AGCTGGACGCGAGCCCAATGGAGCGATTTTTTTTTTTTTTTTTTTTTTTTTTTTTTATACAAGTGTGG  
AGTCCCGTGAAAGAGCTCCGGATGGAAAGTTTTGTTTTGTGTTTACCTCATAGTTAATGTTGTTGCACGT  
CCGCCGTTCTGCCTCAAAATGAGTGAGTTTGGCCACTTGTACTTCCAGGAAGTGTTCAGGAAAAGCA  
AAACAGTAGAGAAGAACTCGACACAGAGGAACGTTTACACCTCATTGCCCACTAGCGTTTTGGAAGTGT  
TTATGCATACTTCGCAGACTTGTAAAGACGCCGGTCACTTGACGCAGAAGTATAAACAGGCTTTAGTGT  
GGACATGGCCTGAGTTAAATTCAAACCTGAACCGGAAGTTGGAAATTTTTAACTTTCTTTTCGAAAAAAG  
AGCAGCTTAAATTTTTTTCTTGTAAATTTGATGCAAGATGATAAAATCCGTGCATAAAATACATAAATAC  
ATAAATAAATGTTTTTTTTATTTAATAAAATCTAAATATTAATACTTTAAAGGATTTAAGATGCTAATG  
ACCATTAACGTGTCTTATGAAAATGTCCATAGTGCATCATTTGGGACACTAAATCAAGAGGTTTCATTAA  
CTCTTTTGAAGGTTTTGTTTAGTCAGTAATCACTACAGCTACTTTTCTTTCTCTCATAAACTGTCCATT

Mib **exon 4** TCAGGTGACGGAGATCCAGGACTGGAGTGCTGCCAGCCCCACAGCGCAGCCTACGTCTTTGGGACAAC  
GGGGCCAAGAACCTCTACCGAGTGGGATTCGAGGGCATGGTGAGCCACCCCCATTCTACACACACACAC  
ACAAAAGACTGCAGTTAACAGGCCTTTGTGTTATTACCCACCCCCCGTCTACCCAACACTGCACCACA  
CGCAGGCCAGGCGTCCCATAAAGCTGGCCTTCTTTATAAGGGGCAGCCATTGTGAAGGGCAGCTGGATGAG  
CTATCTGCATGATAAAAGAAGTCTGTTGGCTTTACAAGAGAGCGAGACTCGACACCAAGACCAAAAAGCGT  
GCCTCAGTTGTTGAAGGCCGCCCTTTGATTGGCTGATCCACTTTCTGCAACATCTGAATTCAGCCAATG  
GCTCTGCAGATGCGCTCCGGCTTTTGTCTGTGATTGCAGTGTGTCGGAGGGTGTGCGCAGCCATCTGCC  
ACTGGAATTATTAATTAGATCTGGATATAGAGGAAGATATATAAGGAGGAATAGAGACGTTCAAGTCATC  
TGGTGAATTAGTACTCATGTGCGAGAAACACTAAATATCACAATATCAGATTTGTCCAATGCCATGCAGC

Mib **exon 5** CATAATCAGCTGTCTGTTTCTGTTTTTTCAGTCTGATTTGAAATGTGTGCAAGATGCCAAAGGAGGGACT  
TTTTACAGAGACCCTGTCCAGTATTGGTAAGATTTAAAAATATCTGATATTACAAAATATACCATGCC  
GGTTCAATGAATATACAGTGGGGGAAATAAGTATTGAGCACGTCACCATTTTTCTCAGAAAACAAATTC  
TAAAGGTGCTGTTGACTTGACTTTTCACCAGATGTTGGTAACAACCAAGAAATCCATATATGCCAAAAA  
AACAAATTAATTCATTTACTAATGAACCTCTGTGTTATAAAATGAAATGACAAAGGGAAAAAGTATTGA  
ACACATGAAGGAAGGAAGCTGTAGAAAGACATGGAACGCCAGACAGCAGCAGAGGTCTTTCTTATTGTA  
AAGTAGTATTAGCTGCTTTTGTGCAACATCTACATAAATCAGGAGGATGAAGATGAAACCAGGGTGGACA  
TTTCAGCAAGACAATGATCCAAAACACAGCCAATGAAACTCTCAAATGCTTTCAGAGAAAAATAATCTAGC  
TGTAGAATGGCCAGCCTATCACCTGACCTGAACCCAATAGAAAATGCAAAAACAAAAGCTCAGATTTTA  
TAGACAAGACCTACATAACTGTCAAGGTTTTTACACTGTTGAAGTCTGTGAAAAAAAATCACACCTGAGC  
AATGTATGTGACTATATTCTCCATATGAGAGGCGTCTTTAAGCTGACAGCATCAAAAAGCCTTTTATAT

AAAGTATTAAATACATTCTGTAGTTTCAGCACCTTCTCCTTGTGTCTATTGTTATTATTAACAACACAT  
TTTTTCAGATTTTTTTGGTTTGGTTTTATTTTTATGTTTGTAATGTTTGGGTTTTACTAAAAATTTGGTT  
TAATCCCATGTCAACAGCTCCTTTAGAATATTATCCCAGAAAAAACAATGACTAGTTGAGTACTTTTT  
CCCCACTCTAGTTATCTTTGTCAAGTAAATGTCTCCAGTATATGTTAATGTTGTATGTGATGCCTCCAC  
TAGGTGTCAGCATTGGATGCCTAATATAGCTGATCTTCAAACATTCATCGCTACAGTGAAACATTCCTGT  
TTAAAAGCTATTTTTGGCCCCAGTCCATAATTTACTCTTTGCCGTCCAAACCAATAACATAAAGCTGTTTG  
CAATGATGGTCAGCTCAGATTAATTACACTTGAGGCCTTAAAAAAAAAAAAAAGGTCCAATCATTTTTAA  
AGATGTTAAGCTACATGCCACTTCACAGGATGTTCACTAAGTTTTCTACACTATACTGAAACGAATAAAG  
ACATGTCTGTTTAGTAAAAATGTATTTTTGAAGAAATGTTTATTAATTTTTTATTTTTGTTTATTAAT  
TAATTAATTTATTTATTTGTTTATATATTTATTAATTTATTTATCTATTTACTAATCTATCTATTTATTT  
TATTTATTTATTTATTTACATATTTATCTATTTAGTAATTTATCTATTTATTTATTTATTTATTTATCTA  
TTTACATATTTATCTATTTGCTTATTTATATATTTATTTATTTATCTATTTACGTATTTATCTATTTTCT  
TACCTATTTATTTATCTATCTGTTTATTTATTTATCTATTTGATTTAATTTATTTATCTATTTATTTAAT  
TAGTCCATTTATTTGTTTATCTATTTATTTAGCTATATATTTGTTTATATATTTGTTTATCTAATTTAT  
TATTTATATATTTATTTAATTTATTTATTTATCTATTTATTTATCTATGTATTTATTTATAAATTTATTTA  
TCAAATTTATTTATTTATTTACTTATCTAATTTATTTATCTATGTATTTATTTATTTATCTATTTATTTA  
TTTTAATCTATTTTATTTATATATCTATCTATTTATTTATCAACTTAGAACCAGGACCGCTTCTTTTG  
ATAACACCAGTTAGCTCCAACACATTACATAGAACATAAATACCAAATTCGCTAGAGACTGCAAATACAT  
CGAAATAGGCTATATTTTACCTCCCATAATGATAGTCAGACAGGCAGGGTGGATTAATTTTTGGTAGCCC  
AACTGGAAAACGTAATGACGTTGGCCTAGCAGTATTTTCGAGCCCTGGTTCAGCTGAATTTTCTAGTTTT  
GTTTAGCCTTAGATGATAATGATCATCATATTCGTCCTGTTGTTGGTTTTCTGTAGGTGAGCAGAACGGC  
AACAGGAACCCAGGAGGCCTGCAGATCGGAGACTTGGTCAACATTGATTTGGACCTGGAGATCGTTTCAGT  
CACTGCAGCATGGGCATGGAGGATGGACCGACGGCATGTTTCGAGACGCTCACCACCACAGGCACTGTCTG  
CGGCATCGATGAAGACCACGACATTGTTGTGCAGTATCCTAGCGGAAACAGGTCAGGCACACAGCATTGC  
ACTTATTCATGGGACATTATTTATTATTAGGGTTGCACAGTTTACCGTACTATGGCAGTATCGCAATAC  
TATGGCTAGAAAATACTGGCAGTGCCAATGTAGTTTGTAACGGTAGAATCGTCATTAATGGTTTATCTA  
TAATAGATGTTGTTGCATGTGGAAAAGTCTCTAAAATGCTTATACATTTGTTCAATAATAGACAATTTAT  
TTTAATAGTCTGTAGAGCCCTTTAACGTTGCAAAACTGTTTGCCGGCAGCTAGCTCTCTGCAACTCTCAC  
ATGGTCGCCCCCTGAAGCTAAGCAGGGCTGCGCCCGTCACTGAGTGGGAGACCACATGGGAAAGC  
TAGGTTGCTGCCGAAATTTGTGTTAGTGAGGCCAGCAGGGGGCGCCAACTGCGGTCTGTGTGGGTCTCT  
AATGCCCCAGTATAATGACGGGATGCTATACTGCTCAGTGAGCGCCATCTTTTCGGATGAGACGTTAAAC  
CGAGGTCCCAGCTCTCTGTGGTCGTTAAAAATCCCAGGATGTCCTTTAAAAAGAGTAGGGGTTTAAACCC  
GGCATCTGCCAAATCTGCCACTGGCCTCTGTCCATCATGGCCTCCTAACCATCCCCATATTCAATTG  
GCTTCATCACTCTGTCTCCTCTCCACCAATCAGCTGGTGTGTGGTGTGCGGTCTGGCGCAAAATGGCTGC  
CGTCGCGTCATCCAGGTGGATGCTGCACACTGGTGGGGTTAAGGAGATCCCCCCCATTGTGTAAAGTG  
CTTTGAGTGCCAGAAAAGCACTATATAAATGTAAGTAATTTATTATTAAATTTAGAAATTCACACCT  
TTTATGGTAGCCTATTGCACGTTTTCTGAGGCTTTAGTTCAAACGCACATCTGAATCAGTTCATTTCTGT  
TCCTGTTAATATGATTTAGTAGCTACAACAACCGTGTGATCTCTTTAAAAAGAACGACTCACAAAGAGAC

Mib exon 6

TTTTATTGGATTGTTACCTGATAAGACCAAGAAAAAGAATAAATGGAAAACCCAAAATAGCAACACGAA  
ACATTGAATCAATGTTTGACCACTTCATATAGGCTAATTTTGTGGAAAAATTTTGTAATAAATTTATT  
TTCATGTATTTTTGTTGGTCAGTTATCTTCATGTATTTTTGTTGGTCAGTTATCTACAAAATAAACAAAA  
AGAATGAATACCTTTTTAGGTGAAGTAAGGTGTAAATAATACTTTTTTTTTGTCTTAAGGGAATGTGGAAAT  
ATAAATTTCTATCATCTAATTCCAAATGAACAATAATCTACGTATAACTAAAAAGTTATATTTCTTTGGTT  
TTAATTATATCATTTCATTGACATGCCAGCTAGGAGGGACATTTAACTTTTGCCCTTGCTGACAACAGGC  
TAAACCAAAGTGATGGAATTATCGGTTTTCACAGCATGGCTGTATCTATTGTCTTCTCTGTCTCCAGAACA  
TCATTTGTACACTGTAGTACTTATATACTGATGAGATCTGGAGAAGGCATGGCACCCCTGCAGACAACCAG  
ACTTCATTTGCATGCTTTGTTGACCGTCCCCACCATGACAGACCCACCTACATGCTGTAAAATGTACA  
AATGTATAATGTTTGTGTGGAGTTTAGAGTTTGCTTTTCGATGACGCCACAGCCACGCTGAGTTCTTCTT  
ATTA AAAAGGATTCTGCTTTGAAGACAACCGAAAGATTCTCCCTGGTTTTTTGGGGCTCTTAGAAGTTTAC  
AACAGGAATTATAAATTACATTCAAGTAGGCCTATTATAACATAAAAATATTAATTAAATTACATATTTCT  
TTATTTATTTGAGTTATGAATTACAGTATCGCTATACTACTTGGTATTTTGATACTTCAGCTGGTTGAGTA  
TTGTAAGATTAATATATGGTATTGCGACAATCCTATTTATTATCGTAATTTTTTGCATTATTTCTCGGT  
GAGTGACAAAAGCAAACATTATAACCAGGGCCAGATAGAATCTACAAACATTTATTGGTATTTCTGCACA  
AAATGTTGTCAGTATTATAACTTAACACATAAAGTGTTTTTTTTATTATATATTTATTTTTTTTACCGTCAT  
CTGGGAAACGGTTAGGATTTTCAGTTCGGTAAAAAACTATTAGTGTCCAATTGGGATGACTTTAAATTC  
ATATGCGTGTAATGCATAAGCAGGGCTTAATTTATGCCGGAACAAGCCTGATCCGGATCCGGTACCTCT  
AAAATCTGATCCGACACCTCATTTTTACCATCCCCCTCCTCATACGTACCCCCACCCCTAACTTTCTTCC  
GCAACTCCCCAAACCTCTTCACTTTTCGTACGCGATCGTATATTAATCTACTGAAAGTATTACTTCCACT

Mib exon 7

CTGTGGCCTTCTAATAATCGCAGAGCTCTGTATGTGTCTAGGTTGGACGTTTAAACCCAGCGGTGCTGACC  
AAGGCAAAAGTTGTCCGAGTGGAGAAGTGGCAGCTGGCGCTGAGGGCGGCAGCTCGCAGTTCATGGTGG C←→T  
GAGATTTAGTCCAGATCTGCTACGACATCGACCGCATCAAACCTGCTCCAGAGAGGACACGGAGAGTGGGC G←→A  
CGAAGCCATGCTGCCAGTGAGCATCCCTAGTTTAAATGCAGTAGTGCTTGCCGGTCTGAAACCCACTTTA  
TATCATATATCAATCAGGCATCAGAGATCACTGAGTTTTAAAGTTATCAGATCTTAAAAGTGGCGATTTT  
GTGATGAAAAAACTAGTTCATCGGAAGCACTTGGGGTGTCTGACTGAAAAATCAAACCTCAGTGTGCATATC  
CTCCATTGTGCCACCTCGATTTGACGATAACCCCAATCCAACGTTGGCCAATGCAGACCGAAGGCCTGAC  
GTCTACCGACCCTTTAAAGGTGCAATATGTAAGTTTATAACAACACAGATCACTGCCTATTACAGAGTCC  
CGCAGAAAAAGTGATTGACAGGTGGTAATTATGTGTGTATCTTGCCTTTATTTCATTTACTGTATGATTTG  
TTTATGGGTGAAACAAAGACCATGCAGGTCAGGTAGTTTAAACGGTAGGCTACAAATAATTAATTGGTCA  
TTAATTATTTAATTATTCATAATCGTAAATCGAATCGTGCCCTTTAGAATCGAAAATGTAATAGAATCGAG  
AATTTGGAGGATCGTGACACCCTTAGTCCGTATTATGGTATTATCATGCGTTAGAAGAGTCATAAACTTA  
CATACAGCACCTATAATGAGCATTAAACTGCATCTGCTGGCCTCCTCTACAAGTAGCACACTTGTTTTTAT  
CTGCTTACTGTTTAAAGCGGCTCAGCCTCCTGAAGCACTGGATGTTATCCCGCCAGTGCCTCCTGGGCTG  
GGTTTCTATATTTTTGGATCGCCTCCCTTTTGTGGCCCTCGATGGACAAAGCTTAACAGAATTTCCAATAG  
CTTCGGTTATGAGCAGTATAGATGAGAAATGGTCCTGCAAGAGCCTTTGGGTGTTTTCCGTTTAAATGAG  
CCAATCTCAATTTTTAAAAAGCCAGACCTTACACTTATTGATTTTTCTCCACGTCTCTCTTCACAGGGCTC  
TCAGAGGGGCGTTTTGTACCTGTGTGTAACAGGCAGTGTGCACACACAAACACACAGTTGAAGTTTTCTG

TTGAACAGATTTCTTCCATCACATTTCTAAACAATAGTGTTACTAACTAATTCCCTAATAACAGATTTGTT  
TTATCTTTACTGTGATGATCGCACAAATATTTGACTAGATATTTTTTAAGATGCTAGTATTTCAGCTTAAAG  
TGACATTTAAAGGCTTAACTAGGGTAATTAGGTTAAAGTTAGGTTAATTAGGCAAGGCATTGTCTAACAG  
TGGTTTGTCTGTAGAAAATTGAAGAAATATATGTTGCTTAAAGGTGATGCAAGTCATTTTTTAACTCTT  
CTAAAGCAGAGGTTCCCAAACCTTTTCAGCCCGGACCCCAAAAATAACAATGTCAGGGAATCACGACCC  
TATTTTTCAAGGTGGTTATACTGTGAATACATTGCAGACACAACCTACAGGCACATATAAACATGAGGATA  
TTGAAAACACAAAAATGCAAACTCTATTAACCATATAATGTTTTTTTTATAGTAATTTATTAATTAATATTA  
AAAATTACATTTTTAATATAAAAATTAAGGCTGATGGCTGATTTTTATTTGTATGTTGTTTCTTTAACACG  
CTTAACTCATCTTCTGTGGGTTATGAATAAAAATAGCTTAATAAAGTTTTATTTGAGTTTTGTAAATCACCA  
AGGGACCCCTTGTCAATTGTACCGGACCCCACTTTGAGAACCTCTGTTCTAAAGCATAAAAAATACCGTA  
ATATGTTTGCAGATCTTTAAGAAACATGTTAAATGAACATTCCTTGTTTCATCTGAAAAACAATGCTGAAAT  
CATGTTATTATCATCAGCTATTATCAAGAAGTTTGTATTTCAAAATATAGACGGGCGGCTAGTGCAAGTG  
AGAAAGCGAAACCGCTCGTGCTTTAGACCAGCGGTCCGTAAAAACAATTGGTACCGGGCCACATAAGAAAT  
CATAAATTATTTCTGTAGAAAATATTTCCCCCGGACTTGGTTTCTTCCACTCACCCCGCCATCTCGCG  
TGAAATGGACTATGCCAAAATCCACCACGGAGCGGGGAGACAGATCGCTAGAATATCGCTCAGTGGTGGT  
TGTTGATAGTTTTAAAGGTATAAAACAGGTTTTATAGAGTCCAAAATCAGCAGAGTATTTAAGGATTGTGCA  
TACATGTGTGCGTGCATCGCTAAGTAATTACCCGAAATCATTGCAATATGTATCTATTTGGAGTTTCACA  
TACTCATTAGGGCTGTAACATGCCAATGCATACATTTAATTCGGCTAAACGATTGTATTATTTTTAATAT  
GTTCTGTCAGTTGAAATGTTTGGCACAGATGTTTTGTATTTGATGCATATAAAAACCTTGATTGAAACATAAT  
CAGACCGGATCAATCTGGCAACCTGCGCTTGCAGTAGGCATGCAATACCTAGTTCAACCACTGGGTGT  
CAAACCTGCATACTGTACCTTTAAATGGGCTAATAATATTGACCTTAAAAATAGTTTTAAAAAAGCTGCTTT  
ATTCTAGTCGAGAAAAAACAACAATAAGACTTCTCCAGAAGAAAAAATATTATCAGACATACTG  
TGAAAATTCCTTGCTCTCCTCATTGGGAAATATTTGTGAAAAAAGGCTAATCATTGACTTCCACT  
GTGTCTAGCATTCTTGCCCTTTCTGAGTGTTCGAAAAGGCTTGTGGGTTTAAATGCAACCGCTCTCGT

Mib exon 8 ACTCAGATATTCATGTGTCTTTTTTTTTTGCAGACCCTTGAAAGGTGGGCAGAGTGCAGCAGATTT  
ACTCTGACAGTGACCTGAAAGTGGAGGTGTGCGGGACGTCCTGGACATACAATCCCCTGCTGTCACTAA T←→C A←→T  
AGTGGCCCTGCTGGATCTGCGGTTACTAATGCTTCTGGAGGTAATGCACGCGTGCATTTTTGTGTGAA

ATAATCACAAAAGCACAAATATAAAAAAGCATTATATTTTATTGTAGTTTTTAAATTGTTGTTAATGTGCT  
GCACCTTCTTTTCAAAGTTTAAAAACAATCTAACCTATAATTTCCAAGTCATATTGTGTTCTTGATTGTA  
TTCTGGCAAGTTTTGCAGCCCTAATCCAATGTATTCTGTCAATTAATGTATATGTCAAATGCAGAAAAT  
GCCCTTAATGCCTGTGTGAGTCGAGCACAGTCAGACAAGCATCAATCCGTTTCTCATCCGTCATTGTGT

Mib exon 9 GCTCTGTGTGACACTGCAGCAGTGTGACAGAGATCCTTCTGTGCCCGCAGAGCGCCTGTCTCAGCTCC  
TCAAGAACTTTTCGAGACGAGGAGTCTGGAGACATTAACGAAGAGCTGGTGAAGGCCGAGCCAACGG  
TGACCTGGCCAAAGTAGAGGACATCCTGAAGAGACCCGATGTGGATGTAAGAACCCTCTCTAACACACA  
CTTTATTCTGTGCAATAACTGAATGTTTGTATAACTTTAGCCACACTTAAATTTAATTTACAGTTTAAAT  
GTTATTAACAAACTATTAACCTAAGACTTACTTCAATAAAAATACTCTTTAAATACTCTTCTCTTTAAGGCA  
GGGGTCACCAATCTCAGTCCTGGAGGGCCGGTGTCCCTGCAGGGTTTAGCTCCAACCTGCTCAACACAC  
CTGCCCTGGATGTTTCAAGTATACCTAGTAAGATCTTGATTAGCTTGTTCAGGTGTGTTTGAATGGGGTTG



GAGCTAAAATCTGCAGGACACCGGCCCTCCAGGAACAAGTTTGGTGACCACTGCTTTAAGGCAAGCCGTT  
AGGTCACTATGCTCAGGCATTCTGTTTTGAATCGTGAAACATCATATTTTCCAAAAGCTGCTTGCCGAGCTT  
GCGAGTAGATTACATATTAAGAATCGTGAATAAAATTGAACGACTTTAGTTTCATTTTTAAACGTTTCGAA  
TTGCACAAAATCTGCAGAAAACGCACGCTCTGGTCCCAGCCCTCCCCAGGAGAATCGTCAGTCTGTAGTGA  
TCGATGATTGGCTCCTGTACTACAAGGCGGGGCTTAATTTGCCTTATTGACCGTTATCAAAGAGCATAGA  
AATACCAAGAGGCGACACTCTAGTGCAATTTGGCAAACAGCCACTAGATGGCACGGCGGCTATTTACAGC  
ATATTATAAGTCTGTAAAATAATCTATTAAGAGTGTGATGATTGTGATAGTAAGTGTGATTGTGCTC  
TTTTAGGTTGTATCTCAGCTTTAAAGCGCTTTTAAAATAAATAAATAAATAAATAAATAAATAAATAAATAA  
GCCATTGCGACAGCAATAAGATCCAATGGACAGCCGATTGCCTTCACTCCGAAAATAACAGAATCCGGGGC  
TGTTGCTGGGCACTGCTGTTGCAATGGAACGTTTTTATTGAGTGTACCTCTAGGTCATATGATTGGATGA  
TTAGAAATTTGCATTGAGCAGTTGGCAGGTGTACCTAATAAAGTGGCCGGTGAGTGTAAATTTATCCAGA  
TCAGAAATGTGCGCCAAAGAAGAAAAAGAAAAAATACTGTTCAAGTCTTTTGTACAAGAACACATTCA  
ACCTGATGGGTAGCATTCTTACATTTTTAAGAAGTGCATGATTTAGAATTGAGGAGCTTATGAAGCAAGC  
GGTGTCTTTGATTGAGCAACACACTGCTTCTAGTTTTATGGCAAGTCTGCTTTGAACCGCTCTACCTCAGC  
TTTTACTGGAATCTCACAGATCAGATCAAAACACACCATCAAAGAATGACGATTGCTCTTATATGTATGAG  
ATTTCTTTGCTCTTCTTGTCTCAGAGTCTGAAATTCACAGTTGAAATGTGAAGCTACTTCAGTTTTAACA  
AGTCTCTGAAAGTATTCACATGAAAACACGGGCCATGTTGGTTGTTTTCAAATCAGACCGGACGAATCTAA  
TACAGTACTCAACATTTGAAGCGGATCAGAACCTTTAAAGGTGCAGTATTTAAGTTTGACACCCAGTGGT  
TGAAGTAGGCATTGCCTCCTGGTTCAAACGTACACAAAAGCAGGTTGCCAGATTGACATCACCAACAA  
AGGCTGATTCAATTTGTGTTCTAACTAAAATCAACGGCACGCGATAGAAGGAATATTTTCCATATTA  
GGAGTTTTTGTCTAAACAACAAGTAAATGTTAGACAGCTGTAAAATGCCATTTTACATCACATTTGTT  
GCCATACTACTGAAAGCAGCAGCAGATAGTTTACCCAGATCTGGAACCTAAAGTAAACCATTTGAAAT  
GATCTTCAGAACCGGACTCAGGGCAAGCCAAACATATCAGTGATTCAGCACCTACATTTAATCATGTT  
AAAGAGGTTTAAATATGTATTAATTACATTATAAACCTTACCATTTGCTGGAGTGCAGTGCAGTGCATAT  
TCTGTGCTTCTGAATGGTTGTATTAATTTCTGTGCTGTTAGTCTGGTGCAAACAGCCAAATGCTCA  
TCACTGCAAATCTCGTTTTGCATCGTGTTTTTAGCACACAGGGTTACAATGTGACCTGCTCACCTAATCT  
TTACGTTTCGTAATATTTATAATTTTGTCTAATTAATAACCCTCATGAGGAACTCTGAATCTGCATCAC  
ATTTACAGAGGCTCTACTGTCCATGTAGGTCAAGAGCCTTCTGACTGAATGAATGAAACGCGTTGTTCC  
CTAACAAAGGCAACCCGGAGTGTGAAATATAATTAGCTAAAACAGGCATTTGGGCGGGTTAAATAACAAAA  
CAAAGACAGACGTTCTGGCACGTAATAAGTGTATTCATGTGCATATACATACATACATAAATATAC  
ACACAGTTAAAGACTAATATAGTTCTCCCAAATGATGTTTAAACAGAGGAAGGAATGTTTCACAGTATTT  
CTATAATGTTTTTCTTGTGCAGAAAGTATCTTTGATTTATTTTGGCTAGAATAAAAAGTTTTTAAAC  
CCTTTTACGGTTTATGTTATATCCCCCTTATTAGATATATTTGTTTTGATTGTTTACAGAACAAACCAT  
CATTATTCAATGACTTTACCTTATCTTGCTAATTAACATAGTGAGGCCTTTAAATGTCACCTTTGAGCTG  
AATACTAATATCTTAAAAAATATCTAGTCAAACATTATGTACTGTCATCATTTGCGAAGTTAAAAAAGTC  
AGTTATTAGAAATTTGTTGGAATATCAAGCAAATTCACGTTGTTCAATAAGAAAAGGCTGGAGAGTGT  
TTTTCTCAATGCCAAAAATAATAGTAATTTATTAGACACAAATGAATAATCGATGACAGAGCTCTGGGTT  
ACGTTACCCCAATGCAATACAAGAAATACAATTAAGAGGTTTCGACGCTAACTTACATTTCTGACTCCAG

CATATATACACAACCTGATAATAACAGGTGGAGTTTTGGTTTAAACGTCACCTGATCAGTCATTCCGCAGTCT  
CTTGGCTCTTTGTAACCCCTAGACATACTTCCCTCTTTCTGCAACCCCTTCTCTGCATACCAGAACTGAACA  
ATTACGTGCATCTTTAATATATTTTTCAGAACTTCTACAAAGATCATGCTCCTTGTGACATGTCCAGACAGC  
AGTCTGGAACAAACCTAAATTTATTCTTATTCTGCTTTTTTTCATTAGTCAGCAGTTCTTCTAAAAAGTAT  
GCAGCACAGTAAAAAGAGGAAGTGTGTCTGGTCAAGATGTGTTATAATACAATAGAAAAGATTGATTAA  
TCTGTTAGTCTAAACATTTTTCTAATAAACAATAAAGACACAAAAGTAATAAAAAATAAATTCCTTTTTTC  
CTACAAAATTAATAATTAATACTATAATGTTTAGAAATGTGTTAAGTCTTTTGTCTGTTAAACAGAAATT  
GGGAAAAATTTTACAGAAGTGCTAATAAATCCAGATGTATACATGCATACGCACCTTTAAATATTAAGCA  
AATGTCTCTGTTCTTTTTGGTTCTTGTGTTGGTGCCAGGACTGGCCCTGCGCCCTGCGCCCTCACTC  
AAGTAATTGCTTTGAGCTCGGAGAGAAAAGAAATGGAAGTCAGATCGGCTTGGGTGACTGGCCAAATTATA  
TGCTCGGCAGGACAAGACATGTCCTGCAATACACCAGGGGCTCCGGCATTAAATATTCAAGCCTTTGCAC  
GCTGGTTTAGCTTACCGCAGTGTGCAGATCACAACATCACACTCGTGACACCCCTCATACAGTGGGTG  
AAATATCAAGTGTGTAACGCATCACCATTTATCTCAGAAAAAGTGTGTTGAAGAGGTGCTGCCGAGTTGAA  
ATTTACAGTAACACGCAACATAATCCGTACACACAAAAGAAAAAATTAATTAGTTAAGAAATTAAGTTATA  
CTCCGGGGAAAAAATGAAACACATGAAGATAGGAAGCTATAAAAAGGGCATGGAAAGCCCAGACAGCAGC  
TGAAATCTCTTGGTTTTAGTCATTAAGTTAGTGTAAATTAATATTAGCCGCTTCAGTCTCAACACCTACA  
TTACGAGATGGTGAAGATGAAACCAGGGTGACATTTTTGCAAGACGATGATCCCAAACACAGGCAAGGA  
AACTCTGTTTGTTCAGAAAAGAAAACAAAAGCTGCTAGAATGGCCTAGCCAGTCACTTGATCTGAATCCA  
ATAGAAAACGAGAACTAAAGATCAAAGTTGATGGATGACATCCACAGAAAGGTCAAGATTTTTACACACT  
GTTGAAAACACTCACACCTGAGCAATGCATGGGACTTCATTCTCCATATGAGAGGCGTCTTGAAGAGGTC  
ATTACCAAAAAATCCATAAATGCATTTTTCAGTAGTTCGACATTCATTAATGATAAACATGACTGCTTTTTT  
CAGAAATGTTTTGTTTTATTTGTGTTGGGGTTTTTACCCAAGTCAATTTTCATGCCAACACATCCTTTAGA  
TATATCATGACGTCTTAAATGCCTGATGATGATTAATACTTAATATTTTACCTTCTGTGTTACACAC  
ACATCACTGAAAGAAGGACATGCAATCAGAGATGTTTCATAGCACAACTGATCAGCTATATCTTTTTTATT  
TTCTGTCAGGTGAACGGGCAGTGTGCAGGACACACTGCCATGCAGGCGCGAGTCAAAATGGCCATGTGG  
ACGTCCTCAAACCTGCTGCTGAAACATAGCGTGGATTTGGAGGCGGAGGTATGTGTCCTGCTCCTCAAACA  
CCTCGGTTTTCCCTGAAGTTAATTGCATTTAGAGCGTTCACGTTTTGATCCTCAAGCCAGCAAATGCAGT  
GTATATATATCACTTTTACCATGTAACAAACTGATTTATTATGTAATTAATAAACTTAAAAGTTCATTAT  
AATTATTAATAATAGGGTGCTTCATAAAAGTTATTAATTACTGACCATCTCATTAATATTTAATTTAA  
TACATTTTTAAAATCTTTTGATAATTACTCCATAAATAATTTAATTACATGTAGGCCTGGCATGATTATT  
GCACAACCGTGGACATGTCTTTATGTGGCCATAAAAAACAATTTGCCACATTTTTCAGCTGACTGTGTA  
GCTTCTCTATCTCTATTGTGTCAATATGTCAGTGTGATGGTTAAAGAAAACACTGTAGTATTTACTAT  
AAATTACTAAAGTGTATTTTCATGTGGGTGCTGATGACTGAAAATAAATCTGTTACTTTTTTTCTGTT  
CTTTTTACTTTAGATGTTATTGTTAACATCATATAATATTTATTATTTAGAAATAGCCGTTTTTACATTCT  
GATTCCAATACCGTACTATTAATAGTTAAAGTACTATTATTAGACGAAATGGTCTTTTAGTATAAAATA  
TGATGTTTTTTGGAAGGGTGCACCTTGCATTATGATGCTGTTATAGTGTCAAAATAGTCTTAAAGTGACAA  
TAATATTGTTTATTGCAATACATTGTTGCTATATATCTGCCCTAGCTTTTTTCTAATGAAGGCCAACACC  
AACTTGATTAAGGCTAGTGGACTGAAGGTAAATATAGCTGCCATAGGTAATTTCTAGTTTTATTTAATG

Mib exon 10

ATGTTTGAATAGAAAACATTGCTTTATATTAAGTAATACAGTTTATTTTACATTTAATAATGAAGTTAT  
TACAACAAAAACAAAATTTAATTTATAACAGAGGTACTAGTTTTTGCCTTGATTTACTCCTGCATAGT  
CCTCTATCCGTAAAGGGACAGTGTTCATTTGAAAAATGACTCATTTCACAACATTTAATGAAAATATTT  
AATTTACAGTTTTTCTTTTTTGGAGTTCAGCAATAAAAAACAAAAACAAAAGGTTGTTTTAAATTAGAAATG  
TTGATCTCTATATTGGCATTACCCCAACCCTCTCCATCATACTACTTATCCTCTCAGATGGGATAGTG  
GGTAATATCAAAGGTTACAATGGGCTATTTGAGCTTCTCTGGTGTATATAACTATGTATGTATTTATGT  
ATAGTATGTGTGATTGTGTATTGTGTGTGTGTGTGTGTGTGTGTGTATATATATATGTGTGTGTATATATG  
TATATATATATATATATATATATATATATATATATATATATATATATATATATATATATATATATATATG  
TGTGTGTGTATATGTGTGTGTGTATATATATATATATATATATATATATATATATATATATATATATG  
TGTGTGTGTGTATATATATATATATATATATATATATATATATATATATATATATATATATATATATG  
GTTGCAACGTGTAGTTACATTTTTTGGAGGGCGCACATCAGCGACGGCCACGGTGTAGGGCTATGCGTCA  
ACGCCGTAGCATACGTGTGCGTTTTGATGCAGAAGTATGAATCAACCTTTACACACATATTTTACTTAAAG  
GTGTTTTCTGTGGGCTATTGTATTTTCATTTGAGGATGTCTAGATGGTAGTGGTAGATTATAGTGGTCA  
TGTGTCCACTGAATACATGTTTCTTGCACCAAAAACAAAAATCCTAATTTAGAAAAACACTGATACTAATA  
AAAACAAAACAAAACAAAGCAATTTCAAACATAAAAACTAGTAAATCTGCCTCTAAAAACAAATTAATA  
ACGAACTAAGTTTTAAAAGCAAAAAGTCAACACGAAATAAAAACTAAAACAAATGAAAAGTCCCAAACTAT  
TATAACCTTGTACCAGAATAAGTATCTGTCACTGTGATGACTTGTTTTAATCTGGAGCTCAGTTTTACAG  
TAATAAAGACTTCTGAACTGATGAAATTAAGCTGATGTCATGTAATGATTAAGGGTGTAAATTTTTTTAG  
CTGTGTGGTCACTGAGTACAGTAAAAGAGTAAGTTAGCGTTAGCATGCAGTCAGCATGGGAAGCTAGCAT  
TGTTATTCGAGCCACGCGTGGGCTCACAATCAAGCCGGAATATTTATGTCCCGGTGTCTGGCGACGTTTC  
AGGAGCAGAAAATGGCTCGTTGCTGTGGAGAACATCAGACTTATTTATTTAATACCTTTAGATTTAGTT  
TTGATTGCAGGCTGCCATTAATAACTTTTTCTCACATCATTTTAAAGGGTTTTGTTGGATTCTGATTTA  
CATTTTCAATGACAGCAAAAATGTTTGTAAAATCAAAGACTTTGAAGGTGAAAATGATGTCTGATGTCA  
TTTTCTTTACATTTACAAATGTTAAATATACATAAATGTATATAAAACAGGACAGAAAGTTATGCAGTTG  
ACGTCATAACTATTAGTCTTCTGAATTATTGGCCGCTCCAGGCAGTGAGTGACATGTGGCTCTTTTCCA  
Mib **exon 11** **GGATAAGGATGGAGATCGAGCTGTCCATCACGCATCCTTCGGGGACGAGGGTTCCGGTCATCGAGGTGCTT**  
**CATCGAGGCGGTGCTGACCTGAACGCCAGAAACAAGCGCAGACAGACGCCGCTGCACATCGCTGTCAACA**  
**AGGGCCATCTGCAGGTGGTCAAGACTTTGCTTGACTTTGGCTGCCACCCAGTCTGCAGGTGAACTATCT**

>Zv9\_scaffold3540 dna:scaffold scaffold:Zv9:Zv9\_scaffold3540:1:281342:1

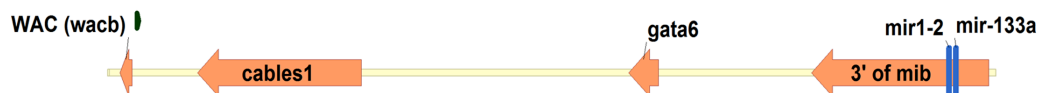

Loci (6 total)

WAC (*wacb*) Start: 3350 End: 7247 (Complementary)

*cables1* Start: 27985 End: 79954 (Complementary)

*gata6* Start: 164736 End: 174290 (Complementary)

3' of *mib* Start: 222692 End: 278952 (Complementary)

*mir1* -2 Start: 266415 End: 266501

*mir-133a* Start: 268599 End: 268697

#Genomic sequence was compared with *mib* mRNA sequence (NM\_173286.3)

# **Yellow color**: Indicate the site of mir

# **Red color**: Indicate the site of Exons

# **Blue color**: Indicate the site of introns

# **Green color**: Indicate the site of polymorphism

# **A←** : The variation on mRNA is A

# **→G**: The variation on chromosome is G

Mib **exon 12** CTGTATACATTACAAAGTGTGCAACTCTTTGCCGCCCCCTGCAG**ACTCTGAGGGAGACACACTCTGCA**  
**TGATGCCATCAGCAAGAAGCGGGATGACATGCTCTCTGTGCTCCTGGAAGCAGGCGCAGACGTCACAATC**  
**ACCAACAACAACGGTTTCAATGCGCTCCACCATGCAGCACTGCGAGGGAACCCGAGGTATGGCTGACTTC**  
**AGATCTGACACAACCTTGGCCTTACAGTTGAAGTCAGAATTATTCAATCCTTCTGTATTTTTTTTGTAA**  
**TTTTTGCCCAACACATTTCCAAACAATAGTTTTAATAGCTAATTTTAAAAATACTAATATTCAGCTTGAT**  
**GTGACATTTAGAGGCTTAAACAAGGGTGAATAATCAAAAAACAATATTGCTTAGGGGCTAATAATATTGAC**  
**CTTAAATGTTTTTTTTTAAATTTAAAGCTGCTTTCATTCTAGCCGAAATAAAACAAATGAGACTTTCTC**  
**CAAAGAAAAAATAATATAGGAAATACTGTAAAAAGTCCTTGCTCTGATAAACATCATTTGGGAA**  
**ATATTTAAAGGAAATTCACAGAAGGGTGAATAATTTGACTTCAACTCTCCATTGGGTTATTTAAAGGTA**  
**TGCTTCGTTGACTTTCTTAAACCAATTTACAGCTCATGTTTGGAGCTTGGCAATTTTCTGGTGTCTGACAA**  
**ATCTACAAAGTATGGTATTTTCATCTTGCCTTGCCTGTAATAAAAAAAAAAAAAAGACTGAACAGTAGAT**

AAATAATAGATCAGGACTGCTGAGGTGTATGGGATTATTTTTATTGTCTTTATCTGTCTTTAACGTTGC  
TTTGGATCTGTAGTGCGTATATCATAATAGTGCTTGTAAAGTTTTAGGATGAGACTGAAAAATGTGCAAATC  
AAGGTAGTTTAGAATGGAGTTTGTGTTTTGTAAAGTCTGCTTTTCCATTGTACGATGTTGTTCGTAATCTGT  
CATAATATTATGCCAAAGCTGATATATCGGCCGATATTTGTCACATTTTATTTTACACATTTATTTTTTG  
TACATTTTTCAAATCATTTAAAATTTAATTCAGTTTTAATTTATTTTATATAAAAATAATTATATTGGCT  
AAATATCGGCCACCCTACTTTCCAATATATTAGCGTCAGCTTTCAAAAAACCCTTATCGGTCAGCTGCTA  
TTGTTACACATATTTTACACAATTTTTTTGTCAAATAATTTTACAGTTAATTCAGTTTTTAATTTAGTTA  
TTAAATAAAAATAATGATATTGGCTGAATACTGGTTATTGGCCACTCTGCTTTCCAAGATATCAGCCTTAG  
CTTCAAAAAAAAAAAAAAAAAACATATCGGTTGACCCTAATGTTAAACACAGATATTTAACACTTATTTT  
TTGTCAAATCATTTTAAAGCTTGATTCAGAATTAATTTAGTTATTGAATAAAAATAATATCGGCTAAATATC  
GGCCACTCTGCTTCCCAACATATCAGCATCAGCTTTCAAAAAACTCACATCAGTCGACCCTAATGTTAA  
ACACAGATATTTAACACACTATTTTTGTCAAATCGTTTTAAATATAATTTAGTTTTAATTTAGTTATTAA  
ATAAAAATAATAATATTGGCTAAATATCGGTTATCGGCCAGCCTGCTTTCCAAGATATCAGCCTCCGCTTT  
AAAAAAAAACATATCGGTCACCCTAATGTTAAACACAGATATTTAACTCTTTTATTTTTTTGTCAAATC  
ATTTTAGATTTAATTCAGTTTTAATTTAGTTATTAAATAAAAATCATAATAATATCAGCAAAATATCGGGT  
ATCGGCCACCCTGCTTTCCAAGATATCAGCCTCCGCTTAAAAAAAACAAAAAAAAAACATATTGGTTGACC  
ACAAAAGTTAAACACAGATATTTAACACATTTATTTTTTTGCTAAATCATTTTTAAATTTAAATCAATTT  
TAATTTAATTTATTAATAAAAATATTTATATCAGCCATCGGCCACTCTGCTTTCCAAGATAGCATCAGCTT  
TAAAAAAAAAATATATATATATATATATTTCTTAATAAAAATCAAAACATTTTTGCTGCATTTTTGT  
GCTTTACAGAATAACGGTGTCCAGTTTAGTTCACAAATCCCTCAGTGAAACGCTCAATCTTAGCTTCAATC  
TCCCAATGGCAACGTGGGGATCCTTTTTATTGACTGTGTAAATGAAGAAGTGGCCAGGGTTGGTATTTA  
TGGGCCGCTTGTTCAGTAGAGCCTTGTCTGGGAGCAGAGCTTGTCCCTCCGCCATCAGAAAAGTCTAGAG  
ATATACAGCTCTCCTCAGCTCACCATTTATTTGTGTTTTTCGCATGAGGTCCCACTGCTGCAGTCTGCT  
CATTCCTCTGCCAACTCACACTCAGTCCAATCCTGAAGCATAGACTCGAGTGCACATGTTTCACGTCTA  
AAAAGTTTTTCTAGGCCATGAAAAACTTTATTGAATATTATAGTTGTTATAGATGTTACTATTTTTT  
TCTACCAGTTGTTACTATAGTAAAGTGTATTTTTTCCATTCCAAAATATAAAAATGGTAAAAAAAAAGTGT  
CTAATATAAGACTTAATATAAGTCTTCTATAATATTATTAATAATATTATTATTGTTATTAATATTAATA  
TTAATATTAATAAGAAGAATACTAGTAATAGTAATATTAATTAATATAATAATAATAATATTATTGTTA  
TTATTGCTATTATCATTATTGTTATTTTTCTTTGTAAAGACAATTAGATCATATTCTGATTTAGCCCTGT  
TAAATAAAATTAATAAATAAATAAATAAATAAATAAATAAATAAATAAATAAATAAATAAATAAATAAATA  
ATTCGTTCACTCCTTAATTGAATAAATGTGTTCAAAACGGACAATACATTTAGAAAATTTCAAGTTGAC  
TCTTTACAAATGGATCATTGATTTGTTAAAGACAATTCTGGAGGGCCAAGAAAAACACTTTAATAGAGAA  
GTAATAGAGAGCCGTTATAGATGTTACTATTTTTTCTACTAGTTGTTAATATTGTAAAGTGTAGTTTTTT  
TTTTTTTTTTTACAAAATATAAGAATGGTAAAAATGTTGCTAATATAAAAAGTACTATACTACTATACTAT  
AAAATATAAAAATACTACTACTACTTTAACTACTACTACGGTGTGTGTTAGTTCCAAGTGTGATGTGCGC  
AGTGCATCTGCTGTGCTACGCCATAAGAATGGAGTCTGCTTTAGGTTTATGGATCAGTACTGCAGGAT  
AAAGAACGTTACGCTGGATGCCTACATTATCCGCACTAAATCTAAAAGCTTTATGAACCTTTGCTGAC  
AGCGATGAATGTTTGGCCTGATAACAGGTTTTGATCTTTGGTTTTATTCTATAAATACTGGAGTTTGT

TCTACAAAAGTTTGAACCTTTGTGAGTGTTTAAATGAGAAAAGTGTGAAAATGTAAAAGCCATTTTTGTGA  
GAGTGTAGAAAAGTGTGTAGTGAGGAGTTTTACAGCCTTGAAACATCTAGAATAATTGTAAAAATAAAGCG  
GACTACTTCGCGGATTTTCGCCGATTGCGGGTTATTTTTAGAACGTAACCTCCCATGATAAATGATGGACTA  
TTGTATTTTAAAATGTTTGCACATCTTGCCATTTCTGTTTTTTTTATGATAATCTGTAAAAATAATTTGT  
ATTTTTATGTCCTTAGTTTGTATAAATAAATAAATAAATAAAGTGCACCAAAAATAAATAAATAAATA  
AATAAATAAACTCAAAAATTATAAATAAATAAATAAAGATTAAATTAATTGCAAAATAGATAAATAAATAA  
TAAATAAAAAAATAAATAAATAAATAAATAAATAAATAAATAAATAAATAAATAAATAAATAAATAAATA  
TATTTAATAAATAAATAAATAAATAAATAAATAAATAAATAAATAAATAAATAAATAAATAAATAAATA  
ATACAATTTAATTTAATTTAATTGATTAATTATTATAAATAAATAAATAAATAAATAAATAAATAAATA  
ATGTTGAAAAACAGTATTCGAGAATTACCCGGATGACCTACTACTTCCAGCAAGATTCTAAAGAGCGCAT  
CTAATGCATGCTATGCTATCCCATGCTATGAATGAGAGTGAAGCGATGCAGCTGAAGCGGGTAGGTCACG  
TGATCCTGACAAAAGGGTGGATGTAGTATGTCCGAGTTCATTCATGCTACTCACATTTTACTGTTTGTAG  
AACATACTTTTTCGAATGGCTGTGTAGTTAAATGAAATTCAAATGCAGTACCTACTGAGTAGTAGGCTGTT  
TCGGACGCAGCCTTTGACTTGCTATGTGTGTCCACACAGATTTCTACATTCATCTCTTTCTGCTAAATA  
TTTTAAAGTCTTTATTGAATATTGCATTACCCGTGTCTATCTATGCATTGCGGATTAGCACCCCTGGTGGT  
TTTGAAGTTGTAGTTGTTGTTTTTTTTCATCATGTGTTTATGAGAATCCAGGCTGAGAGCGGGACTGGT  
TCCTCTCAGTGAATCTCTGGAAGGCAGTTGTGCTCCAGCACTGTAAACAGTACGATTAATAGCCCATGAC  
TCATAACACAGTCCACAAAACAGGCCCGCTGAGGCCGTGCGCAGCACTACTGTACAGATCCTCCAAACTGT  
TTGTTAACCGCCACGTGGAGAGTCCCACCCCTCAGCGCACTGTTTACTGCCTCTATTACAGCTTTATAGTT  
CCGGCTTTAGCCAAATAGTCACATCTAATGTTGCTCATAGAACTCGCTATTCGTTGAGGAAGAGGTTTGG  
CACCCATGCTGATGATTAGAGGTTTTTACTGTTGAAGTAGAAATTATTAGCCCTACTGTGAATTTTTTT  
TGTGTGTGGCTTTTTATTTGTATTTTAAAGAAACACAAATATATAAATGTATGAAGGGTTCAACAA  
CAATTTTTCTTACTGGCCCGATTAGACCAGTGGTTTCAATTTTTACTTGCCTGCCAAAAAAAAAAGTTA  
ATTGCTATTTCTTAGCCACATATATTAATAATGCATCACAAAATAATGTCTGTGAATCTAGAATTTAAA  
TGTTTTGAAAAAATTTAATATTTAGCAGAAGTTTGAAAAATGTGCAGGTATTTTATTGCAAAAACAAAA  
GTGGCTGACGTAAAAGTGACAGCAAACCTAAGCAAACATCATTTTCAGTTTTTTCATAGTGTGTACCCAT  
GTAATGTTTTCCACAACGTTATAAGCAGACGTTTTCTTTTAGCCTCATAATTTGATGTTGCGGTCATGTT  
GCAGTCTATTAATAATTTAGTGACAAGGCAGAACTGCCCAATCAGGCCAGTAATGATTCTGTCTGCTGTC  
CTGAGCATCTCTCACACTGGCCCCGGGCCATCAGGCAGTCTTATTGTTGAGCCCTGGTATGTAATGTGT  
GTGTGTGTGTGTGTGTATATATATATATATATATATATATATATATATATATATATATATATATATAT  
ATATATATATATATATATATATATATATATATAAATTACATTTTTAAAACTAATAAGTTAACTTTTTGC  
TTTATGTTGGCCCAACTCAAATTGATTGTGTGGAACCAGCATTCTTACAGTGTAAAGCACACTCTAAGA  
ATTTTATTTGCTGTTTGTTCAGCTACATACATAAATAAGAGCTGCAACAACACAATTCTTGAGGGTTTTG  
TTGTGACAGCCTATTTGTTTTACAATTAATCCACTTAAATTTTCAAGAACTAATACGTTAACATAATTCC  
TTTATGCTGTCTAACTCAAACCGATTGTGTGGAACCTTTGTGGAGCATTATTACGGTGTAAACACATGTA  
AAAAAGTTTTGCTGATTGTTCAAACCTGCTTTTATAAAGTAAGATTAAACAACACAATTCTTGAGTTTGT  
TTATGAAAACCTATTTATGTTCAAGCTAAATTTTTAAAACTAGTAGGTTAACTTAATTCCTTCATGTTG  
TCCCAACTCAAATAGGTTGAGTGAAAACCAGCATTCTTGTAACACGCTCAAAAAATAACTTTTGCTGTT

TGTTCAAGCTACTTATTTAAAATGAGCTAAAAACAATACAATCCTTCAGGATTTTCTGCAACAACCAATTT  
GTTTTATGTACAAGCTAGTTACATTTTTTAAAACTAATACATCAACTTAATTCCTTCATGTTGTCCCAAC  
TCAAATCGGTTGTGTGGAAATCAGCATATGCGTGTGTAAACGCATATAAAAAATAACTTTTGCTGTCTGA  
TTAAACTACTTATTTAAAATGAGCTGAATCGACACAATTCTTGAGGTTTTTTAGCAACAACCTTAATTGCT  
TTGTTCAAGTTGCTTAAATTTTTTTAAAACTAACACGTCAACTTAATTCCTTCATGTTGTCCCAACTCAA  
ATCATTATGTAAATCCCAATAAATTCCTTACAGTATGAACTCGCTCAAAAAACACTTTTGCGTTTTGTT  
CAAACGCATATTTAAAATGAGCTAAACCAACACGATTCTTGAGGTTTTTTGCTACAACCTAATTGTTTT  
GTTCAATCCACTTCAGTTTGTAAAATCTAATAATTTAGCTTGATTCCCTTATGTTGTCCCAACTCAAATT  
TGTGTTTAAACCAAGTTTTTTACAGTGTAAACACTCAAATTACTTTTTGTAGTTTGTTCAAACTACTTACT  
TAAGCTGAAGCGACGCAATTATTAAGTTCTTTTTCTGTTGCGAAAACTTAATTACGTTCAATCCATGT  
AACATTTTTAAATGAATGTCTACTTAATTCCTTCATGTTGTCCCAACTTAAATTAATTATGTGGAAAACA  
GCTTTTTTAGTGTAACGCGTAAAGTCATTTTTGTTGTTTGTAAAGCTACTTATTTAAAATGAGCTGAA  
GTTAAGTTAACTTATTAGTTTTTACAAATTTAAGTGGATTGAACATAAAAACAATCAAGTTGTCTCAAAA  
AACCTTAAACAATTGTGTCGATTGTGTCGAACGCTGCTTTTTTGAGTGTAAACACTCAAAAAATATCTTT  
TCCCATTTGTTCAAGCTACTTATTTAAAAAAGCTGAAATTACACTATTAAGTTTTTTTTCTTTGCGAAA  
ACTTAATTGTTCAATCCACTTAAATTTGTAAAATATAATAAATTAACTTAATTTCTTCATGTTATTATTT  
TTTGCGTTTTGTTCAAGCTACTTATTTTAAATAAGCTGAAACACGATTGTTGATGTTAACTCGTACGTTA  
ACTAGTCATTTGTATGAAATCCAGCATATTATTAGTATTATTTTTCTACAATGCATGTAAAATTCCTCCC  
TATCTTAATGAAAAAGTCTTGTTCATCCGCTTCTGCATACAATGGATGTGGATGTATGAGCAGCACAGGGG  
TGATCAGCGTGACATGGTGGCTGATCAGTATAATAATGTGAGAAATTATGATGCAGCGTTGCAATCCATG  
TGACTCGGGGAAGGATGCTGCTGTGATGCAGAGGAGAGGGAGGTTACACCCGCATGCCTGCGCTGCGTC  
AGTGTGCCAGGGGCCATAATTGGTGGATTTTTCTCAGTGTATGATTTGTGTGTACACCCCCCCCCCCCC  
ACACACACACACACTAGAAGCATCTGGCTTTCATCTCAGCTCGTCTGTCTGCAGGCTGAGACGGGCTAC  
CGAAAGGCACACGGGCTACCATTCCCACATGTGTGCGCAGTGAGCTGGTGTGCAGACGCTCTTCTTTCCC  
TCTCCTGACTTTCTTTTGCTTTCCATTTTCCCAGTGTAGGATATTCGTTTATAGGGATGCCAGTTT  
ATATGTCAACTTTACACCCCATTGCGTCACAGTGGCACATTTTAAGAACTTTTTGTCAATTGCTTGCTTA  
CTAATGGAGATGGATGTGTAATAGGGCTGCACAGTATATAGTATAGCATGGATTTTGCATTATGGAGTC  
AGCATTACAGTTACAGCAGAGAATTGTGGAGTCATTTTAGTTTTAACATAATAAATTGAAAGTGTTTTTT  
ATAGCATGTCAAGTTTTAAAAGCATTTGGGCACAAGGTATAAATTTTTGTAGCTTTAACAAAAGATTAAT  
TGCATTTATTTAAGGAAATAGAGCTGCACAATATATCAGTTTAGCATTGATATTGCAATGTGCGCATCTG  
CATTAGTCACATCACGAAGATATGCAATGTCCAGTCTGGATCATAGTTGACTAGGAGCTACAGAATTGTA  
TGTAATCACTGAATTCATATGATTTATCAAAAATATATATATTTTTTAGTCCAAATGTCTGCAATTCAA  
GCAAAAACAAGAGTATTTTTAGTTGTCCCAACTGAAATTGATTGTGTGGAAACCAGCTGTTTGATCAAGC  
TACTTATTTTTTTCTTATTTTTGTATATTTTTATACTTTGAAGTTGATATATTACATATTTTATACATGT  
CTAACATGCTTTGGCAATACTGGACAAAATGTGAGCAGCAGATTTTACCTGTCAGTGGATGCGTATGGCT  
CCTGAATAGAATTAAGTAAAACAAATAGTGGATTTATTTCAATTTAGGCAGTCTTCTGTAACTTCAATC  
ATATTGAATGAAATATTTGTAAAATTTATTTTTTTTTGTGCGAGGTAGGTAGCTTTGTGCTGACCCACAC  
GGAGTCTGCGCGTGCGAATTTTCGCGAGATTTTTAGCCCATCATTGATTGTTTATTTACTTTATATATTA

TATTTGTCATATTTATTTCAGTTATAAAATAAAAATGGTAATATTATTGACTATTATGAAAATATTCATAT  
GATTTATTTACAATACAGCTTGTAAGTAATATTTTCTGTCTTTTAGTAGATATATTATATGAGAGACTT  
GCTCTGTTTACCAAATAAAGTGGATCTATCACTGTAAAAAGTAATATCTGCATATCTGTGTTGAATTTAA  
ACAAACAAGTACAATTGACTAATGTTCAACTTAATTTGTTTGTAAAAATTCAGCCCAAATAAATAGTTTG  
CAACCACTTAACCTGAAAAATAATTTGTAACTCAAGGAATCATCATTGAATCTCTTTTTTTTATAAGTGT  
AATTGGATTTGCATTGTAAATATTAATAAAAGTTAAAAAAGGTATTACTTTTATTTTCATATATTAAGGT  
TTTAGTTATGATACTCCAAAAATAAATCAGCATAAATCCGCAGATTTTTTAACACAACCTTTGCGCAGAAAA  
AGCAAAAAATATCAGCAGATTCCATCTGGACCTAGCAATGGCTCCTGAATCAAATTAATAAAAAACAAT  
AGTGGATTTATTTTATTTCAGCAGTCTTTTTTTTAACTCAAATCCATTGAAAAATTGTATAACTGTGCAT  
ATTAATAAAAGGATTTTTAAAAAAAATCTTTTTTTTTTTTTGTGCGCAAGTAGGTAGCCATGTGCCGGCC  
CACACGGAGTCTGCACGTGCAGATTTTCGCAGATTTTAGCCCATCATTGATTGTTTATTGCTTGTA  
TTTATATTTATTTCAGTTTTTAAATTAATAACCGTAATATTATTGACTGATATGGAAGTATTCATATGATT  
TATTTACAATACAGCTTGTAAGTAATATTTTCTGTCTTTTAGTAGATATGTTATATGAGAGACTTGCTC  
TGTTTACCAAATAAAGTGGATCAACACTGTAAAAAGTAATATCTGCATATCTGTGTTGAATTTAAACAA  
ACCAATTAATTTTAGTAATGTTCAACTTAATTTGTTTGGTTAAATTCAGCCAGATAAATTTATTTGCAA  
CCACTTAAAAAAATTGAGTAAGTTCAAGGAATCATCTTTGAATCTCTTTTTTTTTGAGTGAATTTGGAT  
TTGTATTGTAAAGATTAGATAAGTTAAAAATGTATTGCTTTTTATTTTATATATTAAGGTTTTAGTTATG  
ATACTCCAAAAATAATTCAGCACAAATTCGCAGATTTTTTAACACAATTCTGCGCAGAAATAGCAAAAAAT  
GTCAGCAGATTTTCATCTGGCCCTAGCCATGGGTAAAAGGTGTGTTTCAATCCCGCTACCACCTCAAGTTT  
ATTTCAAACCTGTGGGACGCACTGATCTTGTAATAATCCCTGTAAAGGTTTATTTTCAGTATAAACATTTA  
AATAGGTTAGTTAAGAAATGTTTCAGACAGTCAAAGTGCATTGCATATACATTTATTCAAATAAGTTTTA  
TCAATTACAAATCAAATGTAATCTTGGTTTCTGCGAAAGCAAAACAGGCAAGATGAAAACCGTTCATGA

Mir133a TGTCAATCAAAGCATAGCTACAGCTGGTTGAAGGGGACCAAATCCATTGAAGAGGTGATTTGGTTCCATTT  
TACCAGCTTTAGCAAAGCATTGTGGTTTGATGTTGAGATTTGCTTAACAAAAACAAGAACTTGATGACGA  
TTAACAGATAAACTTGTCACAAGAAATATTGAATAAGCTCAGATACATCTATCGAGTAATACATTTCACT  
GCACTCTAAACGTTTTCTTCTCTTTGGTTAAAAAAGAGAGAAATGCACTCAGCAAAAAAAGATAATAA  
TCCATCGTGCCGCACTCCAGTCAAGTGTCCACGAGTCTTGTAAGCAATTACAGCAGCTGATGGATTAAGCC  
TGCTGAGGACAGAGTGTGCTTGGCCGATCAAGATGTCAGCATGTGCTGCTTTCTGTAGTTGTCACCTTC  
TAAATTTGAAGAGATTTCAGTCATACTGCTACATCGCATGGCTAATTTGCCCACTTAATCCAATAAGG  
AAGTGTGGTGGGAGCTTCTCTGAGATTGATCATGACAAATGTAGATATTTGTACCCTTGTCAGTCACAA  
CACAAGGCTGAAGCAACTCCAGAAAACAATTTGAGTGCCTGCAAGCCATACTTTTGTAACTATACGCT  
TAGAGACAGCCTATTTAGCTTCTTAGCAGGTGGCTTGCTTGGACCCAGCAAGGGTTCATTGCTGCTCAAT  
ATGGCGCTCATTAACGGGGGTCAGTAAAGTGTATTTACACCACAGATCCCCCTCCCTCTGTGCAACAG  
ACACTCGCTTGCGGCATTCTGAACAAAGTTCGGCCCCAAATACACTGGCCATAAGAGGGCAAAAGCCAG  
GAGCAGCAGCTGAACATTCGATAATGTCAGCATCTGCTGTGTGTGTCACTCAGGCTGGGGTTGAGGGCGA  
GAAAGAGGGAACACAGCCACGCGACTGACAGGAGCGAACCATACAGCAAGCAGTGCACAAAAATGAAAG  
AGCACAGCCCTACAGAGGACAGATGGGAGTGTCTGACATTCAGAAAAATGGGCCACAACCTCCCAGGCT  
CCAGTCATGACCAAAAACCTTACACCGTCTTATGCAGATAACACAAGGTGAGCAAGTAAAAGGTTTAA



ACGCAAGCGTTTGGAAATTGCTGCACTGCTCTAGCATAAGCCATTGCCACAAATCAAATATCACCAGAACA  
GATTTGGTGGTGATTTGAATGCTAACAAATACCTGGAGAAAAGCTCTCAAAGCCCTAATGTCTTTGATTT  
ACCTAGATGATCACCTGTTGAGGGTTAGCATTAGTGTATTTCCTCGTCACTTGTGGCCAGTCTGCAT  
TTGTTTCAGAGTGATCGCTATTGTAACCTGCAGTCAAATAGGCCCAAATGGATGTCCGCCCTCTGAAGGCC  
CCCCATATCTTTTGTAGAGGACAATTGGAATCAGCTGACAGGCGGACCCAACTCTGATCTGCATTGTC  
ATTTTTCCATGCTCTAATCTGACTACTCTGTGGCCCAGCAAAGCATTGGCAAGCCTAGCAAACATGAAC  
AATGGGGACACAAATGGGTGGCAGGGTAAAAACAGACAACCGTGCTGTCTGCAATGTTAGAGAAGCTTCC  
TTTTAGTAGCTGAGTGCTACCCCTCTTTATAAAGCCGTTAGCTCAGCAGCTTCCCTGCAGCGTAGTTCAA  
CTCTTAAAGGACACAAACGAGTTGTCCCGAACTTACCCACTCTAGGCAAGTTTGAAAAGATTAGGGTATT  
AATGGTTGTGACGCATGCCACTCCTGCAGAAAACAGGAGCATAGTTGCGTTTGGCTGCAGTTCAAAGCGTA  
GAATGCAGCAAACCTCTCCAATAATCAAATAAGCCTCTGTCTTATGGTGAGGTCTCAGGCTGTCATGAGA  
TCTTTCAGGTTGCAGTGACCGAACTCATTCAAGAAAGTGAACCCCTAAAACAATCATTGTAATGTTAGTCA  
ATAAATAAGCATGCCAATCTTGCTGATTGAACTATCAAGTATTTTCTTAAATTAGGGATGAGCG  
TTGTGGACTGCTGGTGAAGTTACTGAAAGAGCAGCGACTTTTCTCAGAATCCACTGCTGCAGTAAGTTCT  
GGCGCCCTGGTTACACAATTCATCACACTCTCTCAATATACACACACACACACACACATTTCAGTGATT

Mir1-2 CGGGGAAAGTTTACAAACTGAGGATCAGCACCTGACCAAGAATACATACTTCTTTACATTCCATAGCTTT  
TATATGTTTCATATGGGCACATAAAGAAGTATGTACACCAAGTAGGCAGCCCCAGACACAGCTGAGTTTTCT  
TTACCTTCGTTTTGATTTGATGTTTGGTTAGCGTGTTAAGTCATCGTCGATAGATCAGTGGCGCTTTTTT  
TTTTTTTTTTTACCCTTCTGCACAATGCAGTGGATTAGCATTATACATAAGGTGACTTTCACAGATTCTTT  
AGGTCACGTTTTCTTTGCCTCATCCCAACCTTTTTTTCCCCAGTAAATAAATATTCAAGTTTACAACTCT  
TGTATCTTCTGCTGACCTTTTCTGTCTCAAGAAAGTGGGGCTATCCGTGAGGACGTTTTAAAAAGCAG  
TGCCATAGGTTTCTTTTGGTAAAAAGTGTCTCTTTTTCTGTATTTGAGGAAAAAATATTGCTGAATAG  
TAGTGTCTTCTGCAATCTCCATATTATGAAACTTCCAAAAAACTCCTTCAGAAAAAAGGTGCGTTT  
CTATGTAAGTGTCTGAAACACATCTCCTTCCCCTCGATGTCTGTAGTTCAACCATGTTCTGAGGTTG  
TATGTGAGACTGGTTGCTGAAGTCCAAAAATGAGGTTGATCCAAGTGGAAACAGGAAGCTATTGTGAGCAG  
GATTTGGGCTTTAGCCACACAGACCAGGCCAGAGGTCACATGCAAGAGCTAATGCCACTCAGCAATAGT  
AATACGGAACGAGTGTGCTGATTGCTCTTTCATATTTCTCTTTTTAACCTTTTGTTTTTTCAGGTAA  
CCCCCTATCCCCCAAAATCCTTTTTTTTTTTCAGTTGCTCTGGGTGCGTGTATTCTCGAAGCTTCTCTAAT  
ACTTTGTGCAAGACATCAATAAATGTTTGGATGATGGCATGAAATGTTTCAAGTAGCTCTCTAATGAATCTT  
TGCTCCAACCTCCACACATTCACAAGTCAACACCGCCCCGCTCTCTCCCCCTCCTCTCAGGAGCCTATCC  
AACACCAGGCCATAAGGAGAGGTGCACGGGTGAAACATAACAGAAGGACACTTAGGCGGGCTATTCTGG  
GCAGGGGTGAAATCCTGGATGAGTTTGTGGTGCTTGACGGGGTTAGATATGATGGCAAGGTATGGCTGG  
ACTCTGTGGCGCCACAGTGTAGTAAAGATTTAGGGATGAGGGTGTGTTGAGAGGGGGAGACGGCACTG  
CAGCACTACAGCCCTGCCTAGTGATTGAAAGCATGCAGAGAGACAGAGAGAATCTGGGTACTACCCGG  
GGTGTGTGGGTTCACTCACTGACACACATATCCAGCAGTCACCGAACCGCCCTCCCCAGAGAATTAATA  
TGCCAGCACATCTGTTTTTCCATCAATCCGATTACACCACACCCCCCCCCACCTGGCCTGAAAATGCGT  
CCCACCGTGACACCACGTCCTTCTTGGCTAGTCGCACCTGTCCCCCTGCTGAATCGGAAACAAGCTTA  
AAACACCAAAATATGGTTCCAGTAATTTGAGCCGACCACCAGAGGAATGAGTGTGGCAAAGTGTGTAACC

ATCCCGAGTTGTATTCCATCTGTAAGTGCCTCCGAGTCAAAGGATCCCAAATAAAAAGACGTTTCGGGGAA  
GTGAGTTTCAGTCCATATTTGAGATGTCTTCGGCGCTGCAGCCACGAGGAGGTAATGAACCACAGAGTGC  
TGTGCTGCAGCAGCCTGCTGCCTGACCAGCACTGGAAAAGCAAGAGACAGAGAGAGAGTGGGTAGGGCA  
CAAGAGCGAGCGAGCGAGTGCAGCGAACGAGGTGGAGACAGTATTCTGGTGCAGCAAGCAAGCAAATCCATG  
CAGATGACAGCAACTTTTCCCTCATTCCACCTACACTTGTCTGTCCGGCTGTTTCAGAAATCCCTGATTT  
TTTTTTTCCTTGTGAGGGGGACTTACATATCCTGAGGTGTTCCCATAGAAGTAGTTTCCCCCCTCATGC  
TGCTGCAGAGCTGTAAATTCCACTCCCTTTCACCGACCATGCCGCACACCGCGGCTGACCGGCCACGCGC  
TTAACCCCAAGTGCATCCGAACGCAGAAAGAAAAAAGCAGAGACGTCAGTGCAGGACCGCGCCATGGG  
GGGCAAACTCCCGTCCGGAGGGAGGAAGGCACGGGGAGCATATATTACCTGTCAGCTCAGTTTCTCCGC  
TCTCTGCTCCTCCCTCTTTCTTCTCTCTGTGTGTGAAGAGCCATAATGACCTCGAGTTCTCCAGCTGCT  
GCAGCCATCGCATGCCGACTCGCTGATTCAGCTTCTCTTACGGGGGGTGGGGTGGGGGGAGATAGTGAA  
CGAGTGTGTGGAGAAGGAACAAGAGTGGTGAAGCGGGAGGGGTGGAGCTGGGTGAAGAAAGCATACTC  
ACGGCTTACATTTAGGCAGGGATAGACATCATGCTGACACGGGGAGCTGTCGCTGCTGCTCAAAAACGG  
GCAGAAAAAACTGCAGCACTTTACCTCCTCCCTCCCATCTCCAGCATGTGCATTCTCAGTGAGTCCTG  
TGAAGATGTGCATGACTGCTGTAACCTCCTCCAACGCTTTGGCTTTTCGGCTAGTTTATTTTCGGATGA  
GTTTTGAATCGTTTTCAAAGAGAAAACCTTGCTGTTCTTATTTGGGAATAAAAAGTCATCAGCAGAGTACG  
CAAGTTGATGCTAATCTAAAGCTTGAGATAAATTATTAGACGCTGTGGTAAACTTTAATATAGGGAC  
CAATTCTCACTATTAATAAATGGCTTTTACCTGCCATTATTACGACATTGGCTCTTTATTGGTTCTTAA  
ATAGTACATATTCTGCATGATCTACATCTCCAATAGCCCAAATACTACCTTATTAATAAATAAGCAG  
CAAATTAATATCGATAGTTGTATATTACAATAAAATGTGTGATGGAAACCATTTTACCCATTGTTGGTAA  
ATCTTGTCTAAGGTCCACAGAGGTGATGTTTTTTGTTTTATTGCTCTTCTGAAAGTTATTGAAAAGTGAACG  
AAGAGCCACTGATCACAAAAAAGCCAGCTGTTGCGCCTTGAACAAAAATCATTAGCACTTTCCAGCAAGG  
GAAGCATTTGAAAATCAGCTCCTCTTTCAGTGTCTCTCTCACCTCCATGTGACCATATTTAGTCAACCAGT  
GCAAAAAATAACCCCTCCTCGCACCAAGGCAGCTGTCCCCCGACAAGATCTGGGAAGTCTCCCGTTCA  
GCGTTCCACCTATCGATTGTGGGTCCAGCTCTGCGAGCAGCTAGCCTGCATTAGCACAGCACTGCCTTGC  
CTGCTGCTATTTGCTGTTATTTTTAGTAGCACCAAATAAAGTGGTCTCTCATGGTTCCACTTCTATTTT  
CCTCACTCCTTTCCCTCCTCTGCTTTTCTAACACCACCCCCCTCCACCCCCACTCTTATGCATCTA  
AACACCCCTTCCCTACTCTGTCTCTTTTAAATAGTGTGGAACATGCTGCATATGGTAGATCTTGCCTC  
TCCTCAGTACTAACTTAGTATCATATGCAGTTAGGTGTGAGATTACAGGAGCAGCAAGTAGTGTGAA  
GCTTTCTGAAAAGTATGTAATAGAGTGAATTTCAATCAAACCTGACACTAGCTTAACTCTTCATCTAC  
AACTGTCAAACCTCATATAGAGCAAGGGTTTATCTTGGTTCTAGGACTTGCTGGAATATCGCTCAAGGTT  
CATGTTTGTATTGTTCCCTCTTGAGCAGGGTGCCCAAACCTCGATCCTGATGGGCAGGTACCCTGCAGAG  
TTGAGTCCAACCTTAATTAGACACACCTGAACCATTTAATCAAGCCCTTATTAGGTGTATTAGAACTT  
TCTGGCAGTTGTGTTGAAGCAAGTTGCAGCTGAACTCTGCAGGACACCAGCGAGTTTGGGCACCCCTGCT  
TGTTAGATTTTCAGTCATTTTTCAGGGTCCACATTCTGGCTAACTGAGGCCTAGTCTACATGGTAAACGGAT  
TAAATCGATTTGCAAAAAAAAAAAAAAAAAAAAAAAAAAAAAAAAAATATATATATATATATATATATATA  
TATATATATATATATATATATATATATATATATATATATATATATATATATATATATATATAAAAA  
AAAAAAAAATATAAAAAAAAAAATATATAAATAAATANNNNNNNNNNNNNNNNNNNNNNNNNNNNNNNN



TACTGTGCATTAAACAAATGTGCACCCTCTAGTTTTCTTTTTGGTCATAAATTGTGAATGTTAGCTAAT  
TACCAGGTTATCGATTAGAGAAAGCAGGGCGACTAATTGATGAACTTGTAGTCTGCTTTTTCTACTTCAGT  
TTAAGTCCAGTTGTTCTACATTTACAGTAATAGGAAGAACTTTGTTTTATGTAAAGTATAATGTATATC  
ACCAGTTTATTGGCAGCCTGACGTGATGTGAAGCACTGTTGTATGAGACTGAAGGGCTTTATTTTATGAT  
AACAAACAGCCTGGATGTACTTTATTCTGCTTATTACGTGGGTACTTGCCATAAAAATGTAGAAAATTAGACA  
ATTGCAACTGCCTAGATGTACTTTAACCCTTTTTTACATTGGTGCATGCCATAAAACATAAAAAATTAGA  
AAATAACAACCTGCCTGCATGTGCTTTTATCTCTTTTTTTTGCATGGGTACTTGCCACAAAACCTTAATTAGAC  
ACTAACAAACCACCTGGATTACCTTTTATCCCCTTTTTTACAATGGTACTTGCCAAAAAACGTAAAATTAG  
ACCATAACCAGCGCCTGCATATACTTTTATCCCCTTATTACATGGGTACTTGCCACAAAATGTAAAATT  
AGACAATAACAATCACCTGTATGTGTTTTTATCCCCTTTTTTACATTGGCACTTGCCATAAAACGTAAAAT  
TAGACAATTATAACCACCTGGATGTACTTATCCTACTTTTTTATATGGGTACTTGCCACAAAATGTAAAAT  
TAGACAATAACAACCGCCTGTATGTACTTAATCCCCTTTTTTACATAGGTACTTGCCACAAAACATGTTT  
TGAGCCTTGATAGTTTTTTTTTAAACAATTTAATTAATGCAAACTTTACAGATACGAAAACGTCCGAGTG  
GAGCATACACTAACCTGTGATTATTTCAGTCACAAGATAGCGCCAAACAGTCAAAAACAGCGCCGTGACA  
GACTTGTGTGTAATAGATGTGAACGTTTTTCGATGATGATCAAGATGATTTAAAGTACTCGAATAAACCT  
GTGATAAAAGTTTCAGCGGTTGTTATCTGGGAATAACATACGTTAGAATGTTGTGACTGAGCAGTCAGAA  
TCAAGTTGTTCTAGATAACAGTATATTTAAATGTATACAACATTGTAGCTATGTTGTGAAAATTATATTTA  
TGATTGATTGACAGTAATTTATCTTACAAGCATATACAGCTAAAGAATTAATTTTGACTTCAACTGTATC  
TATAGCTCAGACTTTCCCCAATGAAGTCTGTTCACTTGCCAAAATGGCTCTAAAATCTATTCTCAAATG  
TGATGTGTGCTTTCATTCCTGCAAAATGTTGCACAGCTAAGATTTCCAGCAACGATTTGAGAGCTTTACA  
CTGACAATCGGGCCTTTGACTGGGTGCAGCACCCGTGGGTAATTCTGTGGTTTAGAAAAGCTGTCTGGAA  
GTGCTGAGTTAAGGTACCTCTGTAACAAGAGATCTCATCAATCACACCACAGAACCTGACTGACTGAATG  
GTGATACGTATTGAGTTAAGCATGGCTTTTAATTACTATAGGCCTTGGGGTCTGCATAAAAAGACGAATT  
ACTTTTTTAAATGTTAATTGTCTGATTAATTTTGGCACAGCTCTTAAGTCTAGATGGGACTGATTACAAA  
CAACAGACCTGTCTGGGGAGCCAGATTTGATTTCTTATTTGGCATTGTATTGCATTTAAAAGGTAGGAGG  
GTGAGTCAAGATATTTGATGTTATTCCACCTTCACCTAGGGTTTGAATCTATTGTTTCATATATGCTCCA  
TCGTTTATATTGTGACGCATTGATTAACAGTAATACTTTTTCGTAATTTATTTGAGCGCAATATTGCACA  
CCATTTCAGGCATGGAGACAGAATCATGAATAAAAACATTGTAAAAGTCCGAATCTAGGAAGTACAGTG  
TTTTTTTTGCATTTAATTTAGCTATATTTTATGTTGGGTCTGTAATCTAGTTTTTTGAAAAGTGTATTATG  
CATTAGTTTTTATTTAGTATTTTGTCTATTATCAAACATTTGCCCTGAATGTTTAAATAAAGTGATAAAT  
ATGATCACATATGGAGTAGATTTCTGAACACAAAAGTTAATTAATGTACATAAAAAGGTATCTATTGTG  
GTTATATATAATTATCAGAATATGAGATGACCTGTATCAATACATGAGATTTGTCATATTACCCAGTTCA  
GTACCTTTATCTCAAAAATATATACAGTGCTCAGCATATATAAGTACACACCCGCACAAATCTGTATTTTAA  
ATTCATATTTTAAATAAGAAGGTATACAATATTATATGTTTGGGTATACATTAGTCAGTGCTAAAAGCTAAA  
TCTAGAGCTTATTTAACAAAATAACTTATGGTAACGGTCCAAAAACTAGTAAAGCCAAATTTATGTGGTA  
TAGAGAAATATTAACACAAAAAGGAAATCAAGAGAAGCAAAAAAAAAAATTTTTTTTGTGTGCAAAAT  
TTAGCTTGAATTTAAATGTATTTTCTTTCAATTTCTATATTTGCTTGGTGATAAAATGTTATTTTAAATA  
ATATATCTGTTTAAATAAATCTGTTTTTAAATGTTCCAAAATACATTGCTTATATTTACTGAGAAATG

GATAAAAATATTCATTTTCAAATGTGGTGCGTATTTATATGTGTAAATTAGACTCATAATGGTACGTTT  
ACACCAGCGCAAGTGATTACATGTAAAGTCAATGCAATGATACGTTGTACGAATAGACATCTTGCTGTG  
TGATTTGTGCAAATAAGGCGTGTGAATGACGTGATTCGTACGAATGAAGCGTTTTACGTGTTTTGCTTAA  
CGCATGAATCACTCAAGTTGGAAAACCTGAACTTTATCGGACATTCGCGCCATGGTAACCAACCAGGAGC  
TTGCTCTTGTAGGGGCGTGAATATTGACGTAGTGCCTGTTGTTGGTGTCTGAGGGGAAAATCTGTTGCC  
GACACAGGACAACAGCTCATCAAACCTGGGCTCTGAAGCACCTCTGAAAGGTCATCCGTGTACATTTACTG  
GAAGGGTTGATGAACTCACAGAGCTAAGTGCCTGCTGAAAAGATCTAGTGGACTCAGACACTGTGCCGA  
ACGAATATACGCTGTTTTTCAGCATTCTTAAAGCACATATAGCACAGCTAATCTCTCAAAAACTCCATG  
TTAGCCATTTAGCAATGAAGCTAGAGTCACCGGGCAGACCGAAGCCCTGCCCGTGAATCTGCATC  
TATTGTGACGTTAATTTGACGGAGAATGAAGCAAGTAAATCAAATGCTCATGAATCTATTTACGCTTG  
AATAACACCATTTATTTAGGCATGCCACGTCTGATGTGAACACAGCATTGGACTCTTGTGGACTGTAAGA  
GACTCTTGTAGGCTCCTTTAGACTCATGTGGAATTTCTTGGAAAGATGATGACTGGTTGACTGCAGAACAAC  
CAACACGTCTCAAAGATTTCTGCTTGTAAACAAGTCTCCTGGTTTGGGTTCTGAATTGTCCAACACATAAT  
ACACTCCAGCATGTTTTGTTCTCTCTCCATCTTTCTCCGTCTTTAAGCATTCCATCATGGTGCGGG  
TAAAGCTGCTGAGCGGCAGACGGCATAAAAAGTGATTTATGGAGGGCCGACCCGAGTGTGTGCGGGGAAG  
CCTGCGGCAGCCGGTCTCTCAGTTCCCTCAGCATTGTTCCCGTCAGCCCCATTGTGGCTGGACCTCTGCTG  
ATCTCCAACCCCACTACACACTCACTGTGAGACCCAGCAGTGGAAACACCCCAAAATAAGAGCAGCGTT  
GGCTCCTATTGACTCCTCACTTTGATTTTGGATTGGGGAAAACCGGAGCACCTGGATGAAACCCACCTCAA  
CATGGGGAGAACATGCAAAGTCCACACAGTAATGCTGACTCAAGCCAGCGACCTTCTTGTGTGAGGCAG  
AAGTGCTAACGATTGAGCCACCATGCTGCCTGTAAAGCTATTCAGAAGACATTTATTATAACACAGTCAA  
GTTGTATATTATATGGTCTAATATTTGTGTGTCCACCAGAATAGGCACAAGCTTATCAACAAGGGGCAA  
AGCTTTTTACTTTTATTACAAAATATCTAAATATTTTTATGTTCTACATATCAAGTCACCTCTCACAAA  
TCTGCTGGTCTCACTGCAAACCAAAAACGGAAAACAATGTAGACCATGCACATTTCAACCTTTCCCCAC  
ATGCATATATCCACCTCCACTGGGGTAAAGGACTGTAATCAATCAAGCCAGACTATCCAAGGACAAACTG  
ACACGAGCCAAATTCGCTTTTGCCTAATCAGAGTGTCTGTACATGTTCTGGGGGTTGGCCAAGTGGCGAT  
TCTGAGCCAATAGTTGTCGTAGCCGCTGTGCTAACGTGAAGAGGCATGACTGGAGGATATCAATAGTAGC  
AGTGAGGTAGGGAGGTGTGTGTAAGTCAAGAGAAACCATAAATAATTTGTATAAAAATAATTAATAACT  
TGGTTAAGCATATTATGCAAACACGTTCCCTGTACAGTTGTATTTAGTATAGACCAGAGATGTCAAAC  
TAGTTCCTGGAGAGCTGTGCTCTGCACATTTTAGTTCACACCTAATTAACACACCTGGTCAAACCTAGT  
TGAACCATCTGGCTAGTTTTAAACCTACAGGTAAGTGTGTTGGAGCGGGTGGGAACTAAACTGTGCCGG  
GCTGTGGCCCTCCAGGAATTGAGTGTGACATCCCTGGTATAGACCATTTCAATGTGGTCATGTCATTGGC  
TCATGAATATTTATAACTGTACAAGAAGCAATCCAATCATAACTTAATGTTAAACACAGCTATCATAAC  
ATTATTTATCAATATGTGGCTCTTTTTGGATTCTCGGAAGCTTTAGAAATTAATAATGTAACACAGGAAG  
TATGCAGGGACCATTATTTTTGTTTGCATCCATCAAATGGTCTATAGTTTGTAGAATTTCTCTTTATGA  
TGCTCTTTTTGTTGATAATGTAGACTCATTGCATCGATCAATATTCAGAGTTCATGTTTAGTGGCTTCCA  
GTGCCTTTTATTAATGAATCAACGTTTTATTAGAGCACAAAATTAATGACTGTGAGCGGGGTTTAGAGT  
TTGCATACTGACCCATGGTTATAACTGACCCATGCTAAAGAGTTGAATAATTCATATATGGTTGCCATAG  
AAACGGATATGATCACCTGGAGGGTCACTGTATCCACTTAACTCGAACTGACAGGTAAGAAAATGGAGAA

GTTTAAATCTGAGGGAACAGTCTAGCATCTGCATCTTGAGTTTCAAAGAAATGGTTTCTATTCTCTCAG  
TTACTTCTCGGTCACCTGAGCGCCAAAATTTAACCCACAAGCAAGCAAATGAGTTAGTAACAGATGACT  
TTCGAAAGTTTTGTTGCGAAGAGGAAAAGGATCAGTTAAGGACCCACGAACTGCCAAGGAATGGATCCGC  
AGCCCCTTGTCAACAAATCAGGTGAATCAGGCATGTCTGCGCAAAAAGATTTACTGCTGGAGATCGCAA  
ATGATATCGGTTTTAGGGGTCGTTACATATTTGTGAATTTTCTGCGCACAAAGTGGAGGCCCTGCTGCGTGT  
GCGCACATTTTGGGAGTGACATTCTTGTGCTTTCCAGGCACTCCCAGTTGAAAACATCTTCAGAATGCTG  
CAAGCACACCACAAGTTATGTGACGAGAACAGACTGATCAGCTTCAGTCTTTCTTTGTTGCTTTAAAACA  
TATTAATTATTGATGCAGTATCACATTTATTGTTTTTATAATAAACTTATAATAGTTTTAAACATAAAACAA  
TCCCGTTTAAAGCACAAATGGAGTTCAAAGCTGAACACACTAGTTGGGCAGCTTACCGATGTCTTGTGCAT  
TTTCTCTGTCTGACAGTATTTACAATTTAAACGTCTTATTCATTTACAACATTTAAATGAAACATTTAA  
TTTTAGTTGGCTTTTTTTGTAGCTCTGCAATTAACAAGGAAAACAAAAGGTTACATTAATTCAAAATGA  
CGATCTCTTTCAAGGTCGTTACCCCTAAGCAGCTCCCCATCATCTCCCTCTCTTTTCAAATGGGTTGGA  
GTGCCAAACCAAAGGTTACAATGAGCCAACTTTGGCCCACGGGCCCTACTTTGGGCACCGCTGCTATATA  
TGAAGAGATGGTATGGATCTTAAAGGGTCACGAAACACCAAAACACATTTTTTGAGCTATTGACAGTCGT  
ATATGTGTCCACACTGCTAAAAACACTATTAGGACACCTATATTTCACTAAAAAGTGTAAATGGTTGT  
TTTTGCGTAATTTCAAGCAAATTCGTACTTCTGTGTTGAAAACGAATTTTTGAAGCTGCGTCACGGTCATG  
ACATAATAGCGTGTATTCCAGCGTGCAGACTGGACGTCTGTGCCAGAGTGTGTCTTATTACGTCTTACAG  
TGTGATGCATTAATGCATGAGTAAAGCTTGGTTCAAACCAATCAGCGCGCTCTATTGTGCAACTTCATTA  
ATATTCATTAGTGTACCGTCTTTACACCACAGAGACGCCAGTTGTGTTGGCAAACAAGCGTGAAGTG  
TTGATTTTATAGTTTGTGCGGTTAAGTTTCGTTTTTCATTTTCTCTCTGTGAGAGCTCAGTCTCATGTGT  
GGATTAACAGTGTATGCGACGCTCCACAACAATAACTTACGTGTCTAAGGGGATTATTGTTTACCTGAG  
AGCTGTTCTCATCTGCAAACGCTGAGATACGGATTCCGGATGTAGTCTTCTCTTCATAAAGACGCGGCTC  
TAGTTGCTGGTGATTGCTCTCTACAGATTTGGTAAGTGAGCGATCAGTACTCTTTGTATATTCAGT  
TTGTTTCGTATCGAATTAAGTTAACTATTGCACTGAGTGCAAACCTGGTTAGCACCGCATTTTGTGACCGGA  
ATAACACACGCGGCTTTCTGACGCTACCTGCCGTGTGCATCTAAGTTTCCGGGAATGCAGAGGTTTTTTTT  
TCTCTCATTCGCCGTGCGGTGTCAAACATTGCATGAAAAATACACGCTTAGAGCAGATCCTCGAATCAAA  
TATCTCGTTTGTGCGGAGGGGCATGAATGAATTCCTGAATGAAAGAGCCAAAACCTGCAGTTAAAGTCCAC  
CATTTAATAATTTGGCAAATAATTCGACTACAGATGTCCATGTAGGTTAAACACCATCACTTTTCTCATGT  
GTGTGTATTTTACTGAAACTCGCGCGTGCCCAAATAGACACTCCACACCCTCCCACCTTAGTTCTCTCC  
GACACTCCCCCTAAACAGAGCTGGACACGCCCACTTTTCTGACTTTTTCCAAAGTGGAGGTGTGAAAAC  
ACCCTGCTGAAACGAGGGGGTTTTCATGGCCCTTAAACATCACGATTTTTTAGTGCCTTGATTCCAGCTCCA  
CTTTTTTTTTCTAGGCCTCCCCTACGTAGTCGCTTCACTTTTTGCTGCACTGAACCATTGAACTGTGCTG  
CCACCAACCTACTTGTGCTGCAGTAAGGTAGCATTAGCCGTTTCCCTCCTAGTAACAGTGAGCTCCAAGC  
CTATGACAAATTACCATGTGGCTACCTGAGACAACAGGCCTCGTCTGCATGCTCCTGAGGGATCTTCGTA  
TCTCACAGGGTGACCCAGTTCCATCATGCTTCTCCTTCACTCACTTCTCCTCCTGCCTTTTCTTTCACT  
TCTCCATTTGCCCAAGTGCTCTCATGCTACATTCTCTTTATATAGGCACTGTTTACCTATGTCAAGTC  
GATATCAAGGTTTCCAAGCCATTCATCATCTCGATTTGCTTTTGTTCACAGTAGAGCGAATCATTACCAA  
GGAGGAATTACAAGAGGTTTATGCCACAGACTGCATATTTTTAGTGTTCTTTGAACTCCTCCTCAACACA

CAAAAAAGTTGACTGCAATGCAGTGGTGCCAGCGAGCTGCATTAATATTAATGCCTGCCCATTTCCACC  
ACCGTGGTAGGCAGCCTGTCTATCTACACCCGCATCTGGAAGGATTTGCAAGTCACAACACCAGTGCCTTA  
CTGGCACCCCGTCCATCTTATTGACGCTTACACAAAGGGCGCAGTAGTGCCAGTCATTTTCTGCACTGCCT  
ACTACCTAACATTTCCACCAGTGCATGTTAAACCCAATTCTAGACAATGCACCAATTGCTCCACAACCTTA  
CTACACTTAAGAGATTACAGTGGCTTAATGGAAGTGTGGAACTTTATCTCATCTTGCCCATTTTGGTAT  
TGACCTTATTTACATGCCACATACTGGCGTGAGTATTTTCAGGTATACAGATGTAACCTGGGCGTATGTGC  
AATGCGCGCTGTGTGTACTGCAGTATTGCTGCTTTGCTGCACAGCGCTCCAAATGTGTACTGAGCTGATG  
CTCTTCTCTGCACTACCTAGGAACTGGAGACTGGCTTTGGGTTTACAAGAATCCACCCTGCAGCAAAA  
AAAAGAAAAATAAGTGGCACTCCAGAGGTTTCACAAATCCTCCTCATCTCTGAAATTACGTTTCATCAAT  
TTCTTTCTTCTTCTTTTTCGATGCTTCTTCATCTGTTTCCGCTTATTCCATCAATGGTAGCTTAAGAAG  
TCCCTTAACACTCAAGTCTTTTTAAAAATGCAACCCCTGCATTTTTTTTAGCACAGTGATGTGATATTACC  
TTGATTCATCACAACTGATTGTGAGATTGCTTGTGTGTGTCAGTTTTCTGGGGGTTTGGATGTGTTGCA  
GTCAGCAAGTGGGGCTTTTTTCAATGCAGTCAAAGAAACATTTTACATTTAAGAGCTGGTCTTAAGCTCC  
GAGTTTTTTTTAAAAGGGACAATATGTCATTTTCACTGCTTGATGGAATGTATTCATAACAAAACAAAGGT  
GTAATTTGATGGCGCTGTGAGTTTAGAAGCTTGTGCATTTATTTCGCAATGCAACCAAATGTAGAAATGG  
GCTGCAGATATTCGTAAACAACAACCAAATATAGAAACCTGCTCCAAATATTCGCAAANNNNNNNNNNN  
NNNNNNNNNNNNNNNNNNNNNNNNNNNNNNNNNNNNNNNNNNNNNNNNNNNNNNNNNNNNNNNNNN  
NNNNNNNNNNNNNNNNNNNAAGCTTGCTGCATTTATTTCGCAATGCAACCAAATGTAGAAATGGGCTGCAGA  
TATTTCGTAACAACAACCAAATATAGAAACCTGCTCCAAATATTCGCAAAGCAACCAAATATGAAAACCTC  
GCTGCAAATATTTCCAACACAACCAAATATAGAAATGCGCTGCAAATATTCGCAACACAACCAAATATAG  
AAATGCGCTCCAAATGTTTCAGTGCCTGCAAATATTTGCACTGCAACCAAATACAGAAATGCACTGCAAA  
TATTTCGCAACACAACCAAATATAGAAATGCGCTCCAAATGTTTCAGTGCCTGCAAATATTTGCACTGCAA  
CCAAATACAGAAATGCACTGCAAATATTTGCAACACAATCAAATATAGAAAACGTGCTCCAAATATTCAT  
AACTCAACCAAATATAGAAAATGTGCTGCAAATATTTGTAACGCAACCTAATATTGAAACTCGCTACAAA  
TATTTGCAAAGCAACCAAATATAGAAATGCGCTGCAAAAATTTCTCAACACAATATATAAACTTGCTTTA  
GATATTTGTAACACAACCAAACATAGAAATGCGCTGCAAATATTCGCAACACAACCAAGTATTAACACTG  
CAAATATTCGCAATGCAACCAAATATAGAAATGCGCAGCCAATATTCGCAACACAACCAAATGTAGAAAC  
TTGCTGCAAATATCCACAACGCAATTAATATAGAAATGCGCTGCAAGTATTTGCAACACAACAAAATAT  
AGAAACTTGCTCAAAATATTCATAACGCAACCAAATATAGAAATACGCTGCAAAAATATTCATAACGCAAC  
TAAATAAGAAATGCGCTTCCAATGTTTCGTAACGCCACCAAATTTAGAAATGCGCTGCAACTATTAGCAA  
CGCAACCACATATAAAAAATGTGCTGTGAATATTCATAATGCAACCAAATATAGAAATTCGCTAGAAATAT  
TTGCAACAAAACCAAATATAGAAATGCTCTGCCAATATTCGTAATATTTAATAATAATTGAATCCACTG  
CTTCCGGTCTTCTAGACGTGGAGAAGTAGTAGTGTGATCAGCACACACAGTCTTACTAGTTAA  
ATTGCTTATTTTTCTGTATTTTAACTTCTTCGAAACATTTGAGCTAACGTGAGTACATTTGCCTTTGA  
GGTTTGCACTCCTAAAGTATCACCAATTAGAAATCTCAAGATATTTCTCTCTTAATAGTCATTGTAA  
GTGCTCTATTAGCCTTTATTGCTCTATTTCTCTTGTTTACCGTCTATTTCTCTTATTGCAGCCATCCT  
TTTTACTCTTATCTGTACATTGTCACCGTCTGCCTGTTTTTCAGCTCGTGGTCATAGATTGCTCCAC  
TAATCTTTTTCTGGTTTACTTGTACCTCATGTTCTTATTATAGGAGCTGCATCAATTTCTGATCAGCTT

CCCGTTTTCGTTGTGAACATATGTCGTGGTCCCTACCTGCTGATTCCAGGTCAGGCTCCAAGTTTTGCTCT  
GCAGATCTGAGCAGGTGCTAGAAAACGATTTGTCGATCCCTGTAGATTTGTGGTTTTATATCAATTTATC  
ATACTCGTTTGATTCTCGGTGCCATTACAGAAAATATGCAGATTTCTATGCTTGCAGTTTTCCATGTACTC  
TTACTTATAACATGTTTCATTGGGTCAATTTTTTCTGTCCATTGCTAAAACCTTTGTATTCTGATCTTTGTT  
Mib exon 13 CTGCAGTGCCATGCGTGTGCTGCTTTCCAAACTGCCACGGCCATGGATAGTGGACGAGAAGAAGGACGAT  
GGCTACACCGCTCTTCATCTGGCTGCGCTCAACAACCATGTGGAGGTGGCCGAGCTACTAGTTCACCAGG  
TCAGCAGCTCTAACACTCACACATTTTTACTGTATCAACACCCCATATTTAAATAGGAAAGTTGAAAACCTC  
TTATTCATACGTCTTAAACTCAAAGTCAAGGTGTTCAAAGAGTCATGAACACCGTCATTAGTTGCATCA  
GCTGTGTTTGATCAGGATTGGAGCTAAACTGTGCAGAGCCATCCAGGAATTGAGTTTGAGACCTATGATC  
TAATTGATCTAACATCATTAGAGCTGACAGAGTTTGCTTGTAAATGTAATTCATTGGACCAAATCAGTC  
AGGACAAAATTTCAACTTTAGAATAGTGGTCCATTAATGTATTTACAGTGCATCCGAAAGTATTCATAGC  
GCTTTACTTTTTACACATTTGTTTATGTTGCAGCCTTATCCAAAATGGATTATATTTCATTTATTTCCCTC  
AACATTCTACACACAATACCCATTATGACAATGTGGAAAAAGAGTTTTTGAATTTGTTGCCATTTTTTA  
CCAACAAAAAACCTGAAGTCACATGACATCAGTATTCACAGCCTTTCCCTCAATACTTTGTTGATGCGCTT  
TTGGCAGCGATTACTGCCTCTTGTCTTTTTGAATATGATGCCACAAGCTTGGCACACCTGTCTCTGGGAA  
TTTTTGCCATTCTCTTTGCAGTACCTCTCAAGCTCTATCAGGTTGAATGGGAAGTGATGGTGTACAGC  
CATTTTCAGATCTCTCCAGAGATGTTTCAGTAGGATTTAGGTCTGGGCTCTGGCTGGGCCACTCAAGGATA  
TTCATTGAGTTGTTGTGAAGCCACTCTATTGATATTTGGTGGTGTGCTTTGGGTCAATGTCATGCTGGA  
AGACGAACCGTCGTCTCAGTCTTCATTCAGGATGTCTCTGTACATTGCTGCATTCATCTTTCCCTCTATC  
CTGACTAGTCTTCCAGTCTTGTCTGCTGAAAAACATCCCCACAGCATGATGCTGCCACCATGGTATTAGC  
CTGGTGATGAGCGGTGTCTGCTTTTTCTCCAAACGTAATTTATTTTGAATAAAGGCTCTAACATAAAAAAGT  
GAAGCGTTATGAATACTTTCTGGATGCATGTACTAACATTAAGTATAAATAATATTCTAAAGTAAGATTA  
CTCTTTTCGGTTCTTCAGCACATACACCTTTGAAAGTCTCTGCACGGGAGTTACAGCAGCCCTCATAACGT  
TTGGCAGTCACTGAAAATGTCCCCCACCATTTGAATTTGAGACTCCTGTTCTAGATGGTTGCTAAGGT  
GTTGCTAAGCGGTTTGCTAAAGTCTTCTGAGTAGTTGCTTGGCAGTTGCTAACATAAAATTAACATGGTTC  
TAGTATGAATTATCATGTTGCTAGCATGTTTCTAGTATAAACTGGCATGTTGTAAGCATGCATTTAGTAT  
GAATTAGCATGCTGCTTGTGTTGATTATGTTGTTAGTATGTTTCTAGTATGGATTGGTCTGGTGTAGTA  
TGTCCAATGTAAAGTGAATGGCAGCTCTTTTTTTTTTACAATGGTAGTCTATGGGACAGTTGCTAGGGT  
GCTGTAAGTGCTTGCTAGGGTGTGGCTAGTGGCTAGTAACTTTAAATGTCATCAGTGATTGGTAGATTGG  
TAGTCTTAGTTAAATGAGCCTAACCGTAAGTATGTATGACAGTCTGGCAGAAGGTTATGAGGTCACAAAT  
TTGGTCCAATGTTAAGTCAATGGGACTTTTCCAAGTTTTTTGAAAACAGTAAGTCGGATCAGTCGGAAAA  
GATATAGCAACTTAATTCAGTATAGTTGTGAGGTTTAAAGTTAGTTTGGTGGTTGTAGTATAAATGGTCT  
AAGAGGAGATGCGTCTTAAAATAGTCTAAGAAGAAGACGGGAAGAAGAGTAAGTTCATGTAGTATAACAG  
TATGTTGGCTTTTTCAAGCCACCTGAATTTTTTCAAAGTGTACCCTAATTTGTGCTTTTTTGGTGACTION  
GCTTTAAATTCAAATGAGATTTTTTTTTAAAGAGGGCCGAGTTATGAATGCCTGTTTGTGTCAGCATAGTGGC  
AGATTCAGAAAACAAGACTAGCATAGTAAGGGTCAAGAATCTTGGTGTGAGTCAGATCTGAGTTTCAATAG  
TCATGCCAAAAGCAGTTAGTAAATCAGTTTACTATCATCTCAAAAACGTTGCAAGAATCAGATGCCGAGTT  
TCCAGTGAAGACTTAGAGAAACTTGTTTCATGCTTTTTATCAGCAGTAGGGTGGATTACTGTAACGGCTCCC



TCACGGACCTTCCTGAAAAGACAGTCAAACACTTGCAGCTCACGATGCGGCCTGGATTCTGACCAGAATC  
AGGAAATCAGAGCACATCACACCTGTCCATGTCTTTACACTGGCTCCCAGATACATTTCAGAATAGATT  
TTAAAGTATTATTACTTGTCTATAAATCACTAAATGGCCTACGACCTAAATTTTTTCAGATTTGCTCACTG  
AATACAAACCTAACAGATCACTCAGATCTTTAAGATCATATAAACTAAAAGTTCCAAGAGTTCAGTAAAA  
CCAGGGTGACTGCTGTGCTACTAACAGCGCCCCCGCTGCTGGAATCAGCTTACAGACATGATCAGAT  
GTGCTCCAACCTGTTTAGCTGTGCCTTTACTGTATGAGCACTGTGCTACGTCCGACAGATCACACTACTAT  
GTTTTCTCTCTTTTTTTCATTCTTTTTATAACACATTTTTAACACATTTTTATCTGTTTTATGAATCAATT  
TTTATTATTTGTTTTTCATTTTCTTATACTTGTCTCTTTTCATTTCTGTTTTATGTGAAGCACATTGAATTGC  
CACTATATAAAAAAAGTTGCCTTGCCTATAAAAAAATTTGTGATTAATGAACGGGGCTTTCCACCGTTG  
ATGACACGTACAAAGGGAGAATGTCAATCACAGCGTTTCTGCAGACTGTTTTAATCAAGTCTGATTATA  
AAGAAATAAAAGTAATACATTTTTACCAACATGAGCTGGTTATTCACACACTGCTGCCACCCAACCTGTGT  
GTAAACCTTCACAAAAGTGATTTTTGGATAATAATTTAATAATTCTATTCTAGCGAATGCGTTCAAAA  
TGTGTTTAATGCTACACACTGCAAGGACACAGTGTTATCAAGTCGAGCAGATTCCAGTTCAGTGATTCTC  
ATTCTGCGCGTGTGGATTTGGCTCCTCACCTTCACACGCATGACACTATGGCTCAGCGTTATATATCACA  
GCATAGCAATAATGTTATTGCAACATTCAGCAGCGTTACGAGAACGCTGCGCCAGCCTTTTGTCAACTA  
CCTGCCATGATGGAAGAGAGGCAGAGACAAAAGAAAAAAAAAAAAAAAAAGGTTACGCCAGAGACTTAAAGCCC  
ACGAACCACAGTAGAGCTGCACTGCAGTAAATGCAGAGAGATGTTGCTATGGGCTTTCAGTCAGGGAATA  
TCTGAATACAAATCACCATTAGCTCGCACAACTTCGGGACTAGAAGGTGATTTCATCTTCAGTACCTGAG  
GACACTGAATTTTCAGTGAATGTAGCATGTAACACACACTAAAAACAAGTGCATTTATATACATAAGAATGA  
GTTTTAAAGGACAACCTATTGATTTGCTCTTCCTCCATAGGGAAATGCCAATTTGGACGTCCAGAATGTT  
AACCAGCAGACGGCATTACACCTTGCAGTGGAGCGCCAGCACACCCAGATAGTGCAGTAAGTAGCTTCG  
GTTCTGTTGTTTTCTTTCTTTTTTTTTTCAATGTTTGACGTCTGCACCCCTCACCCCAGCGCTCAGTCT  
TCCCCTCAACGCATCAATGAAGCAATGTAGCTAAGTGCCTCGTCTTGAGATTAATGCAGGGAGTCCCT  
GCTGCAGATTTATCCCCTCCGATTCAATTCATTTAGTCTGAGCAATCTGGACCTTGCCAGGAAAAGGTA  
CAGGGAGCAGCAATGGATGCTGATTGGATGCGCCATCTTGTGGTTATGTGACAGCAGTGCAGTTTTAGTC  
TTTTCTAAGCACATGTGGTATATTTGTATGGCCTCCCAGATAAAAAACGAAAAAATATGTTACAAGTGCAC  
TTGAAATGCAGAGATGTTTAAAGCACAAATAACATGCATACTAATAGTACATCCTAAGTGTATTTCA  
ATGTGTTTATTATAAAGTAAACTACACAAGTGGTAAACATTTTGCTTAATTGCACTTTTTAAAAATCATG  
CTATTTACTTTTTAATGCATTAACAGAAAAAACTAATATGATTCTTTCTTAAAGTATGTTTTATGT  
GCACTTTGTATAAGAACGAAATGCAAATTTGAGTGTTTAAAGTGTACGCTACCTGAAAAAGGCTTTGTTG  
CCTATCTAAGCTTTTAGGAACAACAAATAGTAGTAATTATAAATTAAGAATAGTAATAGTAACTTCTA  
ATTGATCATTTGGTATCAGAGGTGGCTTATATGAAAGGCAAAGGCCTCTAGACTCTACGCTTCTTTTACC  
ACAATAATATATGTTTCATGCTTTGACTTTTAATGATTTAATTAGGACAGTAAGGTCTGTCTTTGGTTAGA  
CAAAAGTCTTGTCACTTAACAGAAATGATGTGCAGTATAGAATATAAAGTCCCTGCTGCAGTGGAAACAGA  
ATGAATATTTGACTCCCATGAGCTTGGAGGACTGCATCCATACATTTCTGCAATGACTCAAATCACTGAT  
TAATAAAGTCATCTGGAATGGCAAAGAATGCCACCAAGAATGACTCCTAGAGCTCAAGATTCTTTGGATT  
CATCTTTAATTCCTCCTCCTTCATCTCACCCAGACATCTCAATAATGTTTCATGTCTGGTGACTGGGC  
TGGCCAATCCTGGAGCACCTTGACCTTCTTTGTTTTTCAGGAACTTTGATGTGGAGGCTGAAGTATGAGAA

Mib exon 14



CACTGCAGTCCCTCCGTCTGTACACTACACCATCCTTCAGGTGAGACGTTCCCCCCTGATTATCACTTCCCT  
CCTGTATGGGATTGCATATTTGAGGAAAATTGAGTGGGTGGGAGAGCAAGCCGAAAGAAGACAGCTTTGG  
CAGACATGAGCCCTAATCAAGACATTTACTGTACGCTCGTTCCAGTAATTTATTCCCACAATGATGGCA  
ATAGAATTACAGAGCCTATGAGCTCTATTAGAGCAGATTTAAAACGTAATGAATACCATGTTCCGACAGGTA  
AATGGAGCGAATTGTGACAGTGTAGAGAGTGAGCTCCTCATAGAGTGCACCGGTGATGTGATCGGTCTCA  
CTTTATCAGTCATGCAGTTTTTTAAAAAAAATACATTTCCCAATTGTTTAAACAGAGCAAGAATTTTTTT  
TACAGTATTTTCTATAATGTTTTTTTTTTCTCTGGAGGGTTTTATTTGTTTTACTTTGGCTAAAAATAAAA  
GCAGTATTTAATTTTTTAAAAACCATTTTAAAGGTCAATATTATTAGCCCTTTTAAAGCTATGTTTATGTTT  
AATTGTCAAACCACTGTTATACAATGATATGCCCAATTACCTTAAATAACCTGGTTAAGTCTTTAAATTT  
TAAGGCCGTGTTTACACTAATACGTTTTTAGATTTAAACCGCATAAGTTTTACTACGGTTACGCCGTCCGT  
CCTCAGTACCCAGGATTTTATAGAGTACGGGAAACGGATCCAATTCATAAACACACACAACACAATTCGTA  
AAATGTGCAAATTCATTCGTAAATTTAAAAACACAATTCATAAATATGCAAATCGACTTCGTAAGTTTAA  
AACACAATTCATAAATACGCAAATGCAAATTCGTAAATTCAAAAACACAATTCATAAACATGCAAATCCAAT  
TCGTAAGTTTAAACCCAATTCATTAATACGCAAATCCAATTCGTAAATTTAAAAACACAATTTATAAATA  
CACAAACAAAAATTCGTGAATACAAAACATTCATGAATATGCAAATTAATTTGTAAATTCAAAAACACA  
ATTCATAAATACGCAAATCCAATTTGTAAATGTAAAACACAATTCATGAATACACAATGCACAATTCGTA  
AATTCAAAAACACAATTCATAAATATGCAAATCCAATTTATTTGGGAAATGTTTAAATTCATATATTAGAT  
TTTGTAAATGTGAATGTGTTTTGCAGGTATGAGATTTTTTTTTGCAGATGTGATATGATTGAGACTAGA  
TTTTAGAAATATTGAAACATTCATGCTTCTCATTCAAAGCCTTCTCTTATGTTTAAAGGACAGATCAAAGA  
TACTTTAGTTTTTAGGTTTATTATTATTGGGATAATGTCTTTGTATGATTAAAAAAATGCTAGTTAGAGA  
CGGGACATATTTGCAAACCTCTGTAATTTGGCTACAGCTCATAACATCACATCACTACTGATCTGCAGGTTT  
TTCTCTTCACTGCTGTTGTTACACTTTAATAGCCTTAAGCATCCCGCAGCACTTATCGGCGACCTCCCAT  
CCCGCAGCCTTTCTTTATCTTCATTAGCACTTTTCTCTATCAATGCACCTGTGGATCCGCTGTCAGAAAGT  
CACACTATAATGTCTGACACCAGACAGACTGACGATGCTCAACCCTATCTGTTACAGCTTTTGTAGCTCC  
TTTTACGCCTGACCCCGCCCTGCCAGTTCACATCATCGCCTCTCCATGACTGTCGTAATCAAGCGTTG  
TGTGACAGGAGGCTGCTTCCAGGCCAGCCGTCTGCCATTTATTAACACAAAACAGTGTGACAAAATCTCTCC  
ACCCTATCAAACCATCACACTTACCACATGCAGCAGATGGAGAGGCGAGCCATCCATTCAAAAACACTCCA  
CCGAAGCCATCAGTATTCAGAAAACCTGCCCACTTCTTCAGCTCAATGTGCTCCATAGCATTTCATCACTT  
CTGTGGCCTGTTGCACAAAACAGTTGAGGGATGTAGAGTAAGGCTGGGACACACCAAGCTGATGCCAAA  
GAACTAGCACCAACTGTGTTTTTACCTTGTGTGCGATGTGTCTAGATTTGTCTGGACCAAAAAAGATGAAC  
GTGAACACACTAAGGCCAATCCAATTTCTATTTTTGTACCCTGACCTCTCCCTTTGGCCCTTGAAACA  
GAGTGTGAAGGGCTTCAATATTTACGCCTGAAAATTTGGAACAGCATTGCAGCTGCACACATAGTCATATG  
TCATCGCAGGCTCTAGCTTCATATGAGATCAGATGACCGCTCTGCTGTAGTTATTCCAGTTATGTTATT  
TTTTGGTAATTATCTTCAGCAAATCACTGAAGGCAGATATCATGACGATATAATGTGGCAATAAGAGCGT  
AACTATACTGTGCATTTAACACAGTGGCCATATTCATCAGTGTAAACACAAAAAATAACATTACTATTAT  
AGCAGACACTGTAAAAACCCATTCTCAGACTTTTCTGACAGGGTGTGAGCGTCATCGAGTGTGAGAA  
TGTTGTGAAACGACTGTACAGGAGTTATTGTTATGGATTTATTAGGGATTATAGATAGCGAAAATTTGCA  
GGTTTTATTTCTTTTATTTATTTATTTATTTATTTATTTATTTAATTTTTTTAAAGCATGATGGTTT

AAACATGTGCTCGTCTGTTGTAAAAATTTGCAATATTGACAAAATAAATAGTAATTTGTGGCTCTCCTTAT  
GGGTGCAGCGATCCTGCTGTTATGGCTAGTGTATTCTGGGAAATTTTCTTACCCCTGGGTTTCGAATGTG  
GTCCTGAAAAATTTTCAGTTCGAAGGGGTCCCTACACCTTTAAGCTAAAGAGAATTGGGACACCTCTACCG  
TTTCACGTGAACGCGCAAAAACGAGGGGTAAAGGGCTAACGCACCATTACACGGGGTGTGCGTTGACGTCA  
GCCATTGCCGAACCTGCATTGTGTATTTGTGCGCGCCGCTTCGGAGGCGTGTTCGCTGCAGAAGTGGGA  
CTAGCTCAACTTTTTCAAGCGCGATGGAAGCGTCAGCCAATCAGATCGCTGTATGCAAATACACCAGCTA  
GACAGTGGCCTATTGCTGACTGAATTTTATTGGCTGACACTGCTATGACGATCGCGTTAGCACCAACTTC  
AGACACGCCTTCAGTCAAACGTTGACGCTGAAGCCCTGTGTGAATGGGGTGTAAAGAGTAGAATTGGGAT  
TGGGCCTAACAGGGGTGGCCAAACTCAGTCATGAAGAACCGGTACCCTGCAGAGTTTAGCTCAAACCAC  
AATTAGGGTGTACTCGCACTTGGCACAGTTGCCATGAACCTTGCCGAAGCATGATTGCCCCCTCTTTCTT  
GACGACCTGCACTCACACTGCATTTTGTCTTGGCACAATGAAGATTGCTTTAGTTATATTGATTTAGTCTT  
TTGGGATGCAGTGACACAGTCAAATATTTTACCAGATCCACCACCTTTGATGCTTGGAAATATCAAAAA  
AGTCCTCGTGCTGCATGTGTTAGGAGGTTTGATAAAGGTGCAGCTGTGCTGCAATGAGGGGTTTGCCTCT  
TTATTAACCTATGACAGCTCATTGTGAAGAATGATTAATAAATTCATTTGAAACGGTCCTTTAAAAGTGA  
CGTTGCGTCTTCAGTTTCAGGCTTGGGCACACTTTGCCTCACACTACAAGCGTACCACCAAAGCCCAAT  
CAAACCGCGCTTTGGCACACCTCTTCCAACCGGGCCAGGACCGGCCAACTGAAGCATGCCTGGGCCTGAT  
TCTGAGCAAACAAATCAGAAAACCTCTCTGGGCACGGTTTGATAACATAGTGTGAGTGCACCCCTTAGACA  
CACCCAAACAGCAAATCAAGTTCTTACTAGGTGCACTAGAAAACCTTCTGCCAGGTGTATTGGAGCAAGT  
TGGAGCTAAACTCTGCAGTACACCAGTCTCCAGGATGGAGTTTTGGCACTCCTGACCCCTTAGTACCAT  
TATCACTGTAATTGTCACTCACACAGAGGGGTTTGATCATACAAATATGCCTGATCTATTAATCCATAT  
CAGTTGCAAATATTTGTTTGTGACCTACAGCTTAAATATGACATGTGCTGCAAACAGCCAATCAGACGA  
CACATTAGTCGATCAAACAATAATCAAACAGCCAATCACGCTACACATCATCGCAGCAAACAGCCAATC  
TCAAGACACTCAAGTGCAGTAAACAACCAAGCACACGTCAACAACACAGCAAACAGCCAATCACACAA  
CACCTGAGAGCATCAGTTTGAAGTATTTCTGGCGAGAGAGTCAACAATTTACTTCTCTGTTGAAAATTAA  
GTGATACCGTTATGAGAAATATAATGTGTTGCATGAATTTAATAAACACTGCTAGTGTGTAATGTTTAA  
AGGCAACCTAGACAATATATATATCAGTACAAATCTGTAATTTAATAATGTAGGTTAACCAACTCTTT  
AAAAGACAGTCTTTTAAAATGCTTTATTAACAGAAGTCTACATAAATATTTAAATGTATGTTTAAATTT  
TAAAATACAAACATTAATTGGCAAATTGAAGCTGTTAATGATGATGTTAATCCACAGTATTTGACTGAGT

Mib exon 16 GTTTGTGTTGTACCTTCACAGTTGATCATGGGACTGGGCACTCAGGGGGCTGAGAAGAAGAGCGCTGCCT  
CTATTGCTTGCTTCCTGGCAGCCAACGGAGCTGACCTTACCATCCGTAATAAGAAGGGCCAGTCCCCTCT  
GGACCTGTGCTCCTGACCCAGCCTCTGCAAGGCCCTAGCTAAATGCCACAAAGAGAAGACAAGGTTTGTG  
TATCCATTCTAGCTCTACTAGGTGATCTAGTTAAGCTTTTGTACTGATTAATATCTCTCTCCTTCTG  
TGCTTTACACTTTTTTTATATTAAGTGTGTACCAAAGTGTTTTTTGTCTCTCTCATTCTCTGACCCG

Mib exon 17 CAGCGGGCAGGTTGGCTCTCGAAGCCCCTCTCTAAACAGTAATAATGAGACTCTGGAGGAATGCATGGTG A←→G  
TGCTCGGATATGAAAAGAGACACTCTTTTTGGCCCTGTGGTCATATCGCCACCTGCTCTCTCTGCTCGC  
CTCGTGTCAAGAAGTGTCTTATTTGCAAGGAACAGGTTCACTCCAGAATAAGGTACAGAAATGCCAGTGG  
TTTCTGTGGTTTTTTCATTCATGTATTCTAATGTGTATATGTGATCCTGAACTTCAAAGCCAGAGGTGTA  
TTGTTGGCAATCGATTTTTCTTTTATGCCAAAATGTATTGAAATGTTAAGTAAAGTTTAGAGTTGTA

ACTCTACTGACTACTGACATTTTTAAAAGCGTCCACATCTGCATTGAGCGTGTCTTAAATATCGCCAGTT  
GGCCATTGTCTTCACGTTTTTCAGCAGAAATGACTGTGATTGACAAATAACATCAGTTTTCAAAGCAGTGTC  
TATCAATGGATTGCTCATATGTGACGCTCATTGACAGATCAGCTGATCGACACGACTTTGAAACACTTTTT  
ACATTTGTAAAATTTCTCTACCAACTAATACCAAAGTCAATACTTTTTGACCCAGTGTGCTCAAATGTTAG  
CTTGAAATGGACAAATGTTAATTCATTCATTTTTCTTGCCGGCTTAGTCCAGGGGTGTCAATCTCAATTCC  
TGGAACTAAACTGTGCAGGGCTTCGGCCCTTTTTGGAAGTGTGTTGACACCTGTGGCTTAGTCCCATTAT  
TAATCCAGAGCCGCCACAGCGGAATGAACCGCCAACCTTATCCAGCAAGTTTTTACGCAGCGGATGCCCTT  
CCAGCCGAAACTCATCTCTGGGAATAAAATGTTAAATTTTCAGTATTAATTGATTCCAAAGTCGATGCTTT  
TAACCCATTGTGCTCATCAGCATTGTTTTAAAAGTTATCATGAAATGGGTGTTTGTAAACATTTTTGTGCAA  
ATTGATACCGAAGTCAATACTTTTTGACCTAATTTGCTCATCACCGCTCAAACGTTAATGTGAAATTGACG  
TTTTGTAAAATTTTCAGTACCAACAGAGACCAAAGTCGATACTTTTTGACCCATTGTGCTAATCAGCATTGTT  
TAAATTATACTGTGAAATGGGTGCTTGTAAAATTTTTGTACAAATTGATACCAAAGTCAATACTTTTTGAC  
CCAATGTGCTCATCAGCGCTCAAATGTTAGTGTGAAGTGGACGATCGTAAAATTTTCAGTACCAATGATAC  
CGAAGTCGATTTGAACCAATGTGCTCACCAGCAGTGGTCAAATCTTAGCATGAAATGGACGATTGTAAAA  
TTTTACTACCGATTGATACAAAAGTCAATACATTTGACCCAGTGTGCTCATCAGTGTCTCAAATGTTAGTG  
TGAAATTGACGTTTTGTAAAATTTTCAGTATCAACTGATACCAAAGTTGATACTTTTTGACCCAATGTGCTCA  
TCAGCAGCACTCAAATGTTAGCGTGAACCGGACAATTGTAATTTTTAGTACTAATTGGTAAACATAGTTGA  
TGTTTTTGACCCAACATGCTCATCAGCATTGCTCAAATGTTTGCCTGAAATAGGCGATTGTAAATTCAGT  
ACCAATTGATACCAAAGCCAATAGACCCAATGTGCTCATCAGCAGTGTGAAATGTTTGCATGAAATAGG  
CGATTGTTAAATTTTAGTACCAATTAATACCAAAGTCAATATTTTTGACCCATTGTGCTCATCAGTCCTC  
AAATGTTAGCAAGAAATTAACGATTGTAAAATTTTCAGTACCAATTCATGTGTCTTGCCGATTTCGTCCTA  
CTCTTAACAAAACCAAACATCAATGGAAAAATGATTTTATTCAGCTTTCATCTGATGTATAAGTCTCAATG  
TCAAAAACCTTGACGCCTAAGACTGGTTTTGTGGTCCAGGGTACACATTTAACCTTTTTTCTATTGCTCA

Mib exon 18

CCCCTAGATCGAGGAGTGTGTAGTTTGCTCTGATAAAAAGGCAGCGGTGCTCTTCCAGCCCTGTGGTCAC  
ATGTGCGCCTGTGAGA GTAAGTCGGTTTTCTCCACACCTCTTCCCTTGTTCATCCCATATGAAAAACAGCT  
CTTCTGTCTCTGGCTTGTGAGAATATCACACTTCACATGACTCTGATACAGAGACATGCTTCTAGATG  
GATAAGAATAGGATACGGATGAATCAGACATAGTTTGAGGACATCTGTTCAATTTGTCATTAGGTTATCAA  
AAGAAAAGCCACATTTTTCTGATCATCTTATTATTAGTACTGTATTTGATGTCTCTGTTAATAGGAAGG  
GATGAGTTTGACAGATTTGAGATTTTTTCTTACCTTACACAACCTGACAAAAGTCTTGTGCGCTATCCA  
AGTTTTAGGAACAACAAATAAATAACTTGACTTCTAGTTGATCATTGGTATCAGAAGTGGCTCATATGAA  
AGGCAAAGGCCTCTGCTTTTTTTGGGTTTCACTTCAATGCCTCCTCCATCTTACCCAGACATTCTCAAT  
AATGTTTCACTCTGGTACTGGGCTGGCCAATCCTGGAGCACCTTGACCTTCTATGTTTTTCAGGAGCTTT  
GATGTGGAGGCTGAAGTATGAGAAGGAGCGCTATCCTGCTGGAGAATTTGACTTCTTCTGTGTTTGTAA  
TGTAATGGGCAGCACAAATGTCTTGATACCTCAGCCATACCCCTGCCATACACTTCGCAGATCGCTTACA  
CTCCTCCATGCTGAATGAAACCCCAAACCATGATTTTTGCTTACCAAACCTTGACTGATTTCTGTGAGAA  
TCGTGGGTCCATGCGGGCCCCAATAGGTCTTCTGCAGTATTTGTGATGATTGGGATGCAGCTCAACAGAA  
AAATCCACCTTCTCACTTTTCCAAATGATCAACTAGAAGTCAAGTTATTATTTGTTGCTCTTACAACCTG  
GAATTAACAAGACTTTTTGTGAGGTAGTCTACATTGGGAAAAATCCTGCATTTATTGAAGCTCAGAGCTGAT

GTAAATGTCTTAGAGGTGAGGAATAGTTTGCTCTGAGCTTACATCCCTCCTGTCTGATCCCTGAGCTTC  
ATTCTCTTTAAATACATTCTTCACTTGTGAGCAAGACCTCTTTTTTCGTTTTATTCTGGCTTTACCTCA  
GGCTGCATCCTACTGTTCTGTGGCAATTGACTATTTCTTTTTATGTTTAAACAAGTTGGCTTGACAGGATA  
ATGTTAGGTAATATACAGGAAATTTCCAGGTGATATTTAAACAGAGCAAGGACATTTTTTACAGTATTTT  
ATATCATATTTTTGTTCTGTAGAAAGTTTTTTTTTTTTCTTTGTTTGAATAATAATATATTTAGAAAA  
TATTTTTGAATATAATTAGCCCCTTAAAGGGATGGTTCAAGTGGTTACAAACCTTTATAAGTATTTTTGTT  
GAACACTAAATAAGATTATTTAAAGAATGCTGAAAATCTGTAACAATTAACCTTTATTACTGTTGTGTTTG  
CGATGAGGACAAACGCTAAACACATGCGGGAATTTCTTCTTTCTTTCTGTTTACTAAACTCATCAGCAGT  
AATGAAAACAGTTGACTGATTTGAAACAAACAGACGGCCAAACAAAAAGTTACTCATGGATATACAAAA  
GGTGGCCAAACAAAAATACATACATTCCATAATATAAGAGTTCATCTTACACTCAATACACTACATTCAC  
TATAGTATAAAATACAGCACTGCAACATATAAAAGAGAGATCGACTTAGAATGTCACTTACCTGTTAATA  
ATGTTTGGATCAGCTGTAGTTAGAAATTACTATCATCTTTTCTACTCTAAAGGCTGATTTATACTTCTGC  
GTCAAACGTCGGCGTATGCTAGGGCGCTGACGCATAGCCCTTACCCTGGCCGTCGCCGTCAGTACGCTG  
CACCTCTCGAAAAATATAACTACACGTCGCAACGACGCATAGCGTAAGCTCTGTGATTGGTCGGCTTGGT  
ATCGCTGACGAGTCTGGGCGGATCGAGAGCCACGCAATGGCGCGAGCGATTGTTTACAAGTGTGGAGT  
CCCGTGAAGGAGCTCCGGATGGAAAGTTTTGTTTTGTGTTTACCTCATAGTTAAAGTTGTTGCACGTCGG  
CCGTTCTCGCTCAAAATGAGCGAGTTTGAGCCACTTGTACATCCTGGAAGTGTTCAGAAAAAGCAAAA  
AAGCAGCGAAGAAACTCGACACAGAGGAACATTTACACCTCACTGCCACTAGCGTTTTGGAAGTGTAA  
TGCAGACCGACAGAGACAGCGCGAGAAGTATAAATGCACAGCTACGCGCGTTGCATGCGCCGTGGGTTA  
CGCCGGTCACCTGATGCAGAAGTATAAATCAGGCTTAAGGGCTTATTATGCGGTCTCTGTGCGCATCTTG  
AGAACTCTGGTCTATAGACATCAGCATTCCTTTAAAGAGTATTTATTTAATTAATAATGACTGGAAAAATTA  
TAATAGAACAAGCTTTTGATCATGCTGATAATCCCTATCATAATGATAAGTCCCAAAATTAATGTCAT  
ACAGTGAGGTTATAGGGATAAGGGAGCTAATCCTTTGCTTTCTGTGCGTGTACGCGTGTGTCTGTGTGTG  
TGTGTCTGCAGACTGTGCGAGTCTGATGAAAAAGTGTGTGCAGTGTGCGGCCGTGGTGGAGCGCCGCAC A↔G C→T  
CCCCCTCGTTCTGTGCTGTGGAGGAAAGGTATGGAGGATGCCACTGATGATGAGGACCTTAGTGAGTGA  
ACTTCCACACGTTCCCGTTTTTTTTGTTTTTCAATTTCTCTTTCCCTCTCTCTCCGCCTTCGTTCTCATGTCTC  
TCATCTTCAATATTTACGTTGGCTTTGTGTTTAAACGCTTTCTCCGTTCCCTCTCTGCCACACACATCTCTC  
TCTCTCTCTCCCCATTGTTATGACTAATCTGTTATTTCCCAAATGTGCTTTCATGACTAAAAATCATAGCC  
CCTCCCCTTAATGCATAATATCAACACCCTGGAATGAGCTTTGTAATGCCTTTGGAATGTCTTCATAACA  
CTAAATATAAGGATTTTTAGGAGGCCAGTCTTAGGGACAGGGTGTTCACAGAGTCCATAAAATATCTTAA  
ATTTTATATAAGCAAAATTTTAGGCCTTAAAGTCTTAAATTCATAATGTTTTGTCTTAAATTTGTAAACC  
ATTTTAAATGTCCATATAAAGTCAATTATTGTTTCCAATGGAGGCACGTGGATTACGGCGCATTTTGGGAG  
TGACGCGCTCGCACCTCCAGGCGCACCCACTTGAATTTTCTTAACTTTTAAAGAATGTGCGAGCGTAC  
CGGAAGTCACTTGACAAGAACTGACACATCAGCTTCATACTTTGCATTGAATATAACACATTTCCATAGAC  
AAATTATGAGACAAACACAGAACCCTTTTAAATTTACTCCATAAATAAACTTGTATCAGAGCTGCAG  
CAATGTTTTGTCAGCTTGTGCTCTCTGAGAAAACAGTCGATGATAGTCTTGCAATCTACGTACACCTAC  
ATCCACAGAAGTTGCAATTGATAATCATATTTAGAACAAATTTGCGTCATGGTAAACCTTCATAACATTA  
CATTAAATATTCTTTATCATTCAATCACAAGGCGTTAGGGTTCATAAGTTCACAATACACGCTTTAAT

Mib exon 19

A↔G C→T

AAACTTTTTTTTATATCATTTGAAAGTCAAGGAATTTTAACTCAGGGAGTTTTTTGTCCCAAGTCATGGAA  
TATCAGGGAATTTAGTTTGTTCATTTTTAAAATTTGACCTCCCAATTATCAAAATGTGTAATTATTACAGTC  
AAAAATGACTGATTTGGTGGCCAATTTTCTGAATATAAAGCAATTCTTGACAGCATTTCTCGTATTTTGCT  
TTGAAAATACACACAAGCGAACACATATTAGTTCTTCATTACTTTTTTTGAGCTCAAAAATCATTGGTCTC  
TTCAATTTATGGAATGGTAATACTGAAAGAAAACAACGTTTTTTAGCTATTAGCAACATAAAGTGTGTTGCA  
TCATATTTGACGCGTAAATGACACTAAATGATCTGTTAAAATCTCGTCATCAACAGCATTATAAAAAGATC  
ATGTTAAAACGTTAACGTTTTTAGTTATCTATACAACCAGCATATAGGGATGCAACAGTTAGAGATTTTGG  
TTGTACGATTATAGTCTGAGGAATAATCACAGTTATCACGATTATTACGTGTTCTTTTCATTTCAAAAATAC  
TACTAGTTTAGGAAAATCACATGAAAACCTCTTACATTTTAAAGTGTATTAGTAACCAATGAATACATC  
CCAAAATAACAATAAAAAAGAAAGAATATTATCCATTAATTTTTAGACTTAAAATAAATGAAAAATGTTT  
TTAGCATTTAAACATAAGTAATAATTTTACATTTAAAATAAATGACAGAACAAAAATAAATAAATAGTTT  
TTGTCTAATAGAAAATTTAAGCATCGTATTAGTTAAGTATTTCCCTTTTTAAATAGAACAAATGTAGTCGAA  
GACTGTTGAACTCCTGTCTGAAAGGCACATAATATGCACGCAAAACCACATGCCTCCATTGGAAAATAACAAA  
CTTGTGCACGTCAAAGATGTGATATGTGAATGGCCTTAGTTAAAACCTTCTCAGCCATAGTTAAAATTA  
GCCTTTGATCCAATGTGCGTGCATATTGTTTACAGGCTCAGAACTTTAACTAGTGCACATTGGCATAACT  
TTAGGTTGCAGCAGTTTTGTTCCATGCGGAAAATACGGTGTGAGAAGCCTTTATGATTAATTAACCGTGA  
CAAATTAAACTGCTGTTAATAGTGAAATCGGTTAATTGTTGCATCCCTACCAGCATAGCCTTGTCTTTAT  
AGGCTTTGGCTGAATGCGTGTGCGATAATGTCATATGACGCATCTAAAACAAGCCACACACTAACTTGA  
AGTATCGTACACTAGATGACCAGTTTCTGTACGCAAAATAAATGCCATTTAATATAAAGCAATGAAGATG  
ACGTAGAAGGAATTTGAACTGGTCCAAGGCATATCTGTGATAGAAAATATGGCTCAAATGTTAGTGGGAAA  
GCGACGTTGGTACTGAAATTCAGTATCATAACAGCACTAATCTGCGCTAATTACAAAATATTGCAAGCTC  
TCCTAAATTTGACCTAATTTGCGTTAATTTAATCACAGAATTGGCTTTTTAGTCGATTGAAAGCCCGAGA  
TATTTGGTTTTTTAGAGTGGGAACCTGTATTTGTGACGTCATCTTTCCTTTTGTACATGATCATGACAC  
TGCCCATGTTCTTTATGTTGGTTTAGTTGAGTTCAAAGGGATACTGGTGTAAAGTTCACTTTTTTCTTTTT  
AAACGGTGTTTATTTATAGAGAGGAGGATCTGTTTCTTTTTAGCCTCGCTTAGATGTCCAGCACATCCAT  
CCACACTGACGTCTCTGCTGACCTACAGACATGCTGATCCACACACACACACACACACACACAGTTCA  
GCCGACAGAGGAATGTAGCCGCTCGCTCTTATCTTGGTCTGTCTTTAGTGCCTGAGATCTGTTTGTGTA  
AGGCGCCACTTTTTTCCACACACACAAAACCAAGCGGCATCCCATTTAGACCTAACGCACTCTACCCCCGC  
CTTTTCTCCAGAACCCGAGCAATGAGAGAGAAGTGCCACCATAGATGGGATTCTCTACTGCTTCGGTC  
ACTTTGAAGATTCCACATATTAAGAGGATAGACGGGTAAAACCGGCTAGAGTTACGTGAAGACTTGAATA  
TGAACATGGTAAACATCCGCTGTGAGATTTGACATCATTTTTGGCGAAAATAAGTGTGTTAAATGACCCAA  
AAAATGATTTAGTCTTGTAGCTGACCTTGAACCAAGAAAAAATTAATGTCGCAATAAATTTCCAGT  
TTGGTGAATAACATCTAATCTCACACACAAAACACGCTTGTCAAGCTTAAAATTAACAGTCTGTCTTCT  
TCTTTCACACTAATCCATCATATAAAAATCTCCCTTTTAAACCCCATGGCTTCTAAAACCTTTGTTGTAA  
TGTTTTTTTTCCATTGAACGAAAGCCATAAAAATTAGGGATGCACAATATATTTGATACCTTATTGCTTGGC  
TCACACAGAATTTGCTTGGCAGATTTTTGAGTACATCATTTAGTCTATTTATTTATGAAAATGTGTGTA  
AATATAAACGATTCTGCGATCACTGAATCCAACGCAAAATCAACAAAATGTCAATTTTTTGGCATCTTGC  
AAAATCTTACTTTAAATGCAAAAATAAATCGCAAAAAAATGTAATCGCAAAAAAATTAATCATCTAT

AAAAGATCCAGCTCTTAACCATATAATCAAATTATATTTATTTTCAGTTTACAATTAATTGTTTAAACGTGA  
CTTACATTGTATACGCAGCGCACATGATGTATTTGAGTGTCACTCGAAAAATGACGTCTCATATGCACCC  
TCACAATCAATTACATTTTCATGAAAGTGGGGGAAAAATAATTTAGCAGCCTGTGTAATATATACCAAACCC  
CCTAGTTTTTCGTGATTTTGCATCAATAAATCCAAGGCAAAATCAACAAATGTCCCAATTTTTACACAA  
AATTGAATCGCAAAAATATTAATAATCTTGTAAAACATCCAATTCTAAACCGTTGAATCAAATTTTTATT  
TATTTTCAGTTTGAAATGAATTGTTTCACGTGAACAATTGACCTTATTCTAAAATGCAGAAGTGCGCCTGT  
TTTTCGCAATTGTTTTAGAACTTCCGATTCTGTGCGCTATGGAAGAAATGACTAGGAATGATAAACGGCAG  
AAAACGGTCAAACACTTGTCTTACAAAACAAATGTTTGCATAACTATACAGACCAAGTAGGATAATATAA  
TAAGAAAAATGTCAGTTTGAACATCAAAACAGCGAAACGAGCAGTGTTTAATGTCTAAAAATGGATGGAAG  
ACAATCAGACCGGAAGTCTCGAGCCACAAACATTCAAATGACTGCGTCCGCTTGTGCGCAAAGAATCAGG  
TGAATAGACGTTTTCATATGACAGCGCACTTGATGTTTTTTCAGTGTCTCTTGATAAAATGACGTCTCGCCTGT  
GCCCTCCCATTTCATTACATTACATAAAAAGTGGGGGAAAAATAGTTTTGCAGCCTGTGTAATGTATATCAGA  
CCCCCTAGATTTTTTCGTGATTTTTCGATTGCTGATTCCAACGCAAAATCAACAAAATGTCACAATTTTTTTT  
GCGATTCTGCAAAATCTTTCATTTAAACTCAAATTAATCGCAATAAAACTTAATCATCTCATAAAACATT  
CAATTCATAAACCATATAATCAAATATATTTATTTATGTTTGAAATAAATGTTTTACGTGACTTGTAGAC  
ATTGTATATGCAGCGCATGTGATATGAGTGTCTCTCGAAAAATGACGTCTCTCCTGCGCCCTCACAATCC  
TAGCATTACATGCAAGTGGGGGAAATGGTTTTGCAGCCTGTGTGTGAATATATATCAGACCCCCTAGTTT  
TTCATGATTTTTGGGATCGCTTAAACCAATGCAAAATCAACATATTTAGCAATTTTTTTCGATCGTGCAAA  
ATTCTTAATTTAAACAAAATTTTAAACGGAAAAATATTAATAATCTCAATAGCATCCAATTCTAAACCCCT  
ATAATCAAATTATATTTATTTTCAGTTTGCATGAATTGTTTTACGTGACTTATAGACGTTGCTCGAAAAAT  
TGATGTCTCACCTGCGCCCTCACAATCATTACATTACATGAAAGTAATGAAAAATAATTGAAATCAATA  
AGCTAAACTGGCCATAGTGTATGAGAGTGTGTGTGTTCCAGTACTGGGTTGCAGCTGGAAGGGCATCTG  
CTGTGTAAAACGTATGCTGGATAAGATGGCGGTTTCATCCGTTGTGGCAACCCTGATAAAGGGACTTAG  
CTGAAAGAAAATGAATGAATAAATGAAAGATCATGCCTCAGCCGGCTCAGAAAAAGTAACTCAAAAAGTAA  
CGTAACGCATTACTTACCATAAAAAGTAACTAAGGGTGTTTTACATCTGTAGTTTGCTTCATTTGGTCC  
GGACCAAGGGCAATAAATGATACATTGTTGCATTTTCTGCCGTCTTTGAGTCGTTTTTACACCACGCTGC  
TGGCTTTGGTCCGAACAGTTGAAACGAACCAAAATGCAGTCATCTGGCAAAATCCACATCTCTCATTGG  
CCAGATGTTGTTGAACATTTCCCTAAACTGCTTATTGATTGGTCAGAATTTACGTGCGAGAAAAATGCCAGT  
GAACTCCCGCACGTAAACAAAACCGGCAGACACAAAATGTCGTTTTTACACTGGAGGGACGACTGCGCTG  
CTGATTGTATCCCTGCTTTAGACAAAACCTACATTTTCGAGAATGCAGGTCTTTTTGGTCCACTTTTGGTG  
CGCGCTCAAGTATGATTGCTGCATTTTCCCTCCCAACGAACCGCACCAAGAGGAAAAACGAACTCCA  
ATGCGATTTCAGTCGAACTAAATAAGACAGGTGTGAAAGCACCCCTTAGTAAGGCAGCTAGTTACTTTTTTG  
GGGAGTAACTCAATATTGTAATACACTACTTTCTAAAGTAACTTTCCCAACACTGGCCATAGTGATGGC  
AGATAATTAAATCCAACCTGGATTGGAGAGAAAAAAGCACAGAAGTTGTAGTAGTATATAAAGATTGAT  
CATAAAGCATTGGGTGATCACAGACCACAATACTAGACTGCGAAAAATAATAAAAAAATGCTTTTCTTG  
TAGTTTTTGCCTCGTTTCTAGTCCAAATATCTAAAAATCTTAAATCAAGAAGCGTTTGAAAGCATAATG  
AAAACTAAGTGAGCTTTCCATAATATAAGCTAAATAATCTGCCATTGGGGTAAGCGAAAACATTCTTTT  
GTCAATAGTATATATTTTCGGATTTATTGATTAGTGACACTAAATTTTAAAAAACAAACAAAAAGACCCTG



AAACATTAGCTCGAGTTTAAATATTGCTGCATCCCTACATCAAATCCTTCTATTTTTGAAGGTGGCTGTC  
ATCCCTTGTGCTGTGAAGGATAGTCCTGCAGCCATAAATGATGTATACCTTAATCTACACCGAAGCCTCC  
CATCCATAACAGCTTGTGTCAAAAACCTTGTCTCCCCCTTTGCTCCCTCTACTGACTATTTATAAGTAGT  
ATATGCCAAAGGCCAGGCTGGATTGTCTCCGGATCCAGCAGCCAGGGGTTCATGCATTACGTAACACTG  
Mib exon 20 TGACTGGTTGCTTCTCAGCAGGGGGCTCTAACTCAATGGCAGGGGGTTCGCAGGATCTTCTCCAGCCAA  
CAATCTGGCCCTAAGTTGGTGTAAAGTATTCAATTCCTCACCCCAACTTCTTCCCTGCCTCAACTTCTTCCCT  
GCTCCTTTGGGCTCAAGAGTCCGCATCTTCACCCCTGCATTGGTCATTCTCTCCAGTTGGAGAGGCTGTC  
GAGTGGCTCGCTGCGTTTTTCAGTGTGTGGGTTGAGTGTGAAGTCAGAAAAGGCACAAAACCTTTAGAA  
TTATAAGTAATTCAGACATTTAAGAAGTTAGAAGGCTCTGGGGTCTGCAAACGCCAGGCATGAACCTT  
TATAAGCTACATGATTGGCTGTGGCCCTGGTGTGTATATTTTGTCTCAACGCATTTTGTCTTGCATTTT  
Mib exon 21 AGCCAGTGGAAATATCCAGCCTTGACAGAGGGACAAAGACAACACTAATGTCAACGCAGATGTACAGAAG  
CTGCAACAGCAACTGCAGGATATCAAAGAGCAGGTGAGTATGACAGTGTGCAGATGGGATGGACAATTTT G←→A  
AATTCCTTTATTTTTTTGTAGAATAATAATCAACTGTATTTTATAGTTCTTTTACAAGTAGGGGTGGGTAC  
CGAAACCAGGTACCTATGTAGCCAGTATGCGCCAGATTGCATCAGCATATGCATTTTCAGTGCCACTTGTG  
CTGCGATATGAACATAAAAAGCATCAAAAGCATCTGTACACGATCTCTAAACATTTAATCCGAAACAAC  
TTGAGGGATACAGACACCGTTGGTGTGTTAGGCATTTGTTCTTGTGCTTAGGGAAGGCACGTAGGAAA  
CAAGCGCAGTATAGCGCATCCGGTGTGACTCTCTCAGATTCATCAACACGCAGGATCGCGTTCATCA  
AATTTGCTTAAGCTAAGCGTTCTAAAGTATGCAAGGATTCTGACAGGGCAACGTGAAGCACATGCGTTAC  
AAAAGTTGCGTGTGGGGGAAACACGTGAGTCAAGTGTGACCTTAAAGGGTTAAATGAATAAGGC  
TCAGCACTACTACCGTTAAAGTTTGCCTGTATAATTCACCTTACCTTTAATCAGATTATAATCTGCTA  
TTTAAATATAATGCTAATAATTCGGCACAAATCCATCAGTTTCCCTTTCCGGCTGTTCTATCTATGAATAA  
ACTATGTAAAAGCACTGTCATGCGTGTTCCTCGTCGGTTAGTAACGCTATATTTTCATTGCACAACAATT  
AATCTATCAGGCTTTTTTGGCAAAAAATAGAGAAATCACAGTTTCATTTATTGTTATTAGATTATGTTTA  
AATTTACCTCTCCTGCTGAGCTAAGCTGTTGAATGGTTAGCGTATGAGGCGGCTAGGCTAAGCTAGCTT  
TCATTTTGATTGAATTAATCTCTAATCGGTTGCCTATTATGTAGTGAATATACCCCTGTACTGCACACTG  
CAGTCCTTTTTTTGTCTGGCTTTCTCGGATATCTCACCTGTTCCGCAAAAATGACATTATATCCCTGGCG  
ATGTCTGAAACCGGCGCACACACATTGAAAAAGCCGTGCCAGGCACGAAAGCTTGACAGGCGTAGCAACA  
GTAAC TAAGGAGGGCGGGCTTAGCGAAGGGTCCACTGCTGTAAGATAGTGTAGATTTAGCTGAAAGTG  
ATGCAGTTTAAACAGTGAATTGAATCTATTTACCGTCTGTCTACCCACAGATTTGCACCTCTAGATCTTC  
Mib exon 22 AGGATGTTTTGTTTTATTGCCGTTATGGCTCATTGAACATGTTTCTTCCCTCTCAGACTATGTGCCCGG  
TGTGTCTGGATCGTCTGAAGAACATGATCTTCATGTGTGGCCACGGCACCTGTCAGCTGTGTGGAGACCG  
CATGAGCGAGTGCCCGATCTGCCGCAAGGCCATCGAGCGCCGAATCCTGCTTTACTAGAGCGCCGCTCT  
GTGTGGTTCTATAAGCACCTTCCCCGATCTGCAAGGCTCTCCTTGTCTCACGCTAAGCTAAGAGTCAT  
CAGTGTACCACATCCATCTTTGGTTTCATCTTCAATATTAACGTTTTAATATGTTTCGAGGAGACAGAA

**Figure S11.** The assembled *mib* genomic nucleotide sequence from scaffolds 3504 and 3540.

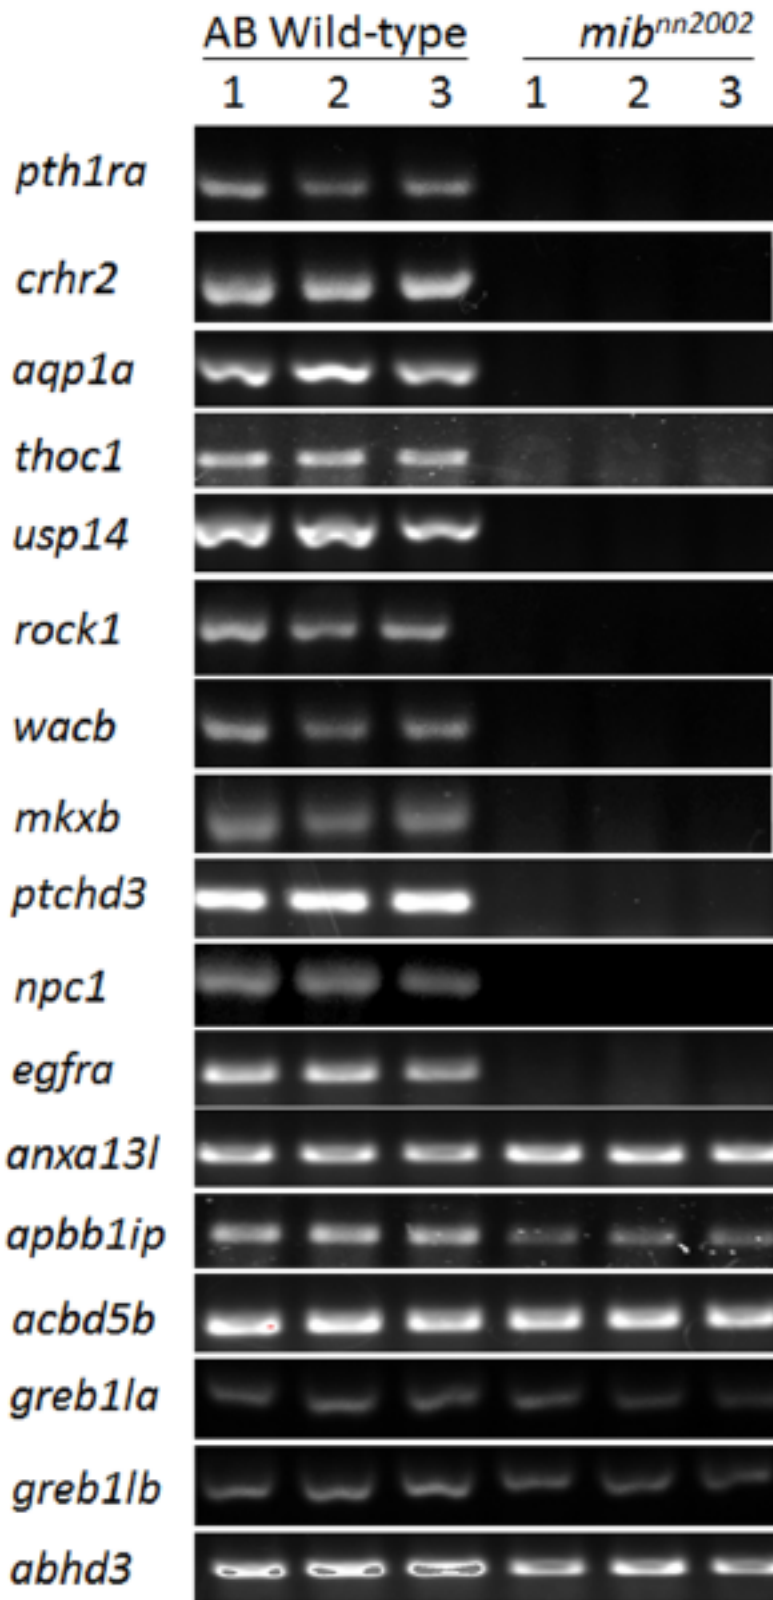

**Figure S12.** Genomic PCR of genes around *mib* locus on LG2 in wt embryos and *mib<sup>nn2002</sup>* mutants. Genes listed in the LG2 hypothetical genomic sequences were examined by PCR. The genomic sequence located much close to the terminal (*cldn1* end) of LG2 than *ap2m1a* were not amplified. The not-amplified genes include genes not assembled in LG2, such as *mkxb*, *rab18b* (in Fig. 7), *ptchd3*, *yme111b* (in Fig. 7), *mib* (in Fig. 7), *gata6* (in Fig. 7) and *cables1* (in Fig. 7).

# A

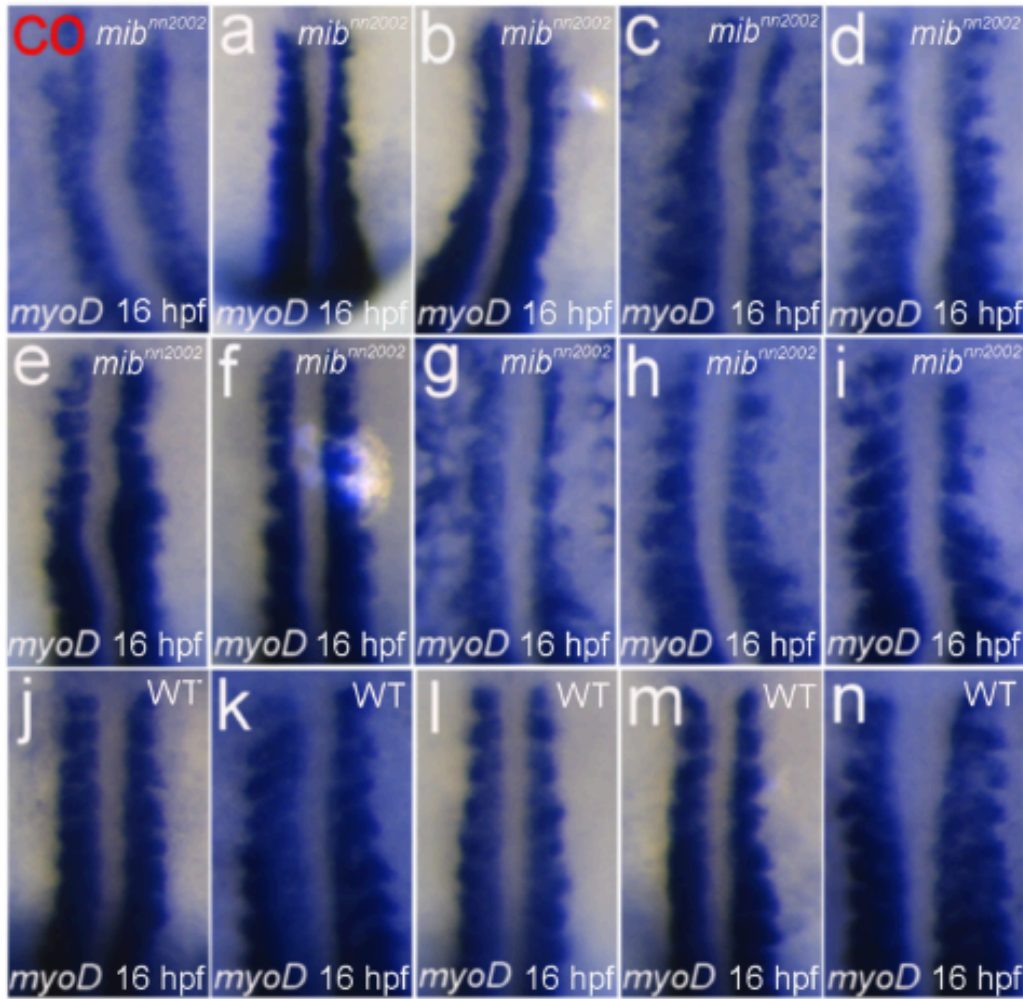

# B

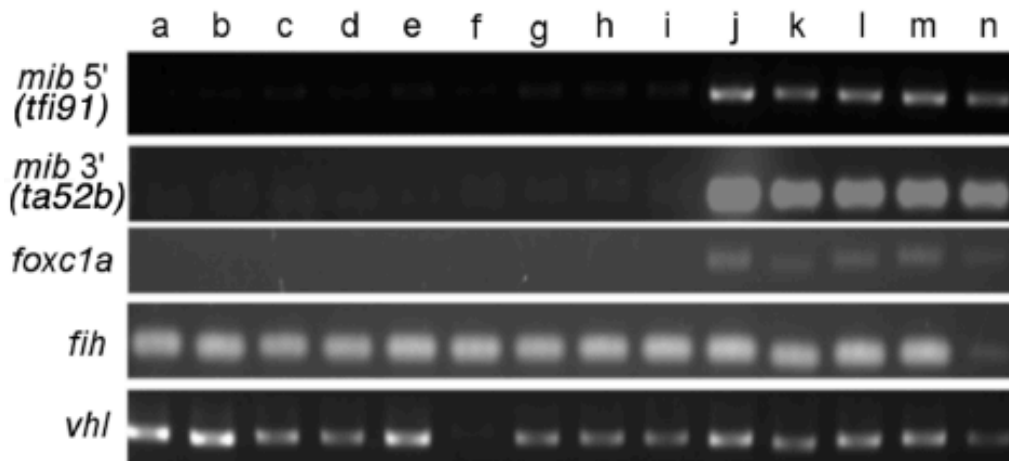

**Figure S13.** (A) The *myoD* WISH results from 20 pg *foxc1a* mRNA-injected (a–i) *mib*<sup>nn2002</sup> homozygotes, and (j–n) WT (siblings) and (co) non-injected *mib*<sup>nn2002</sup> homozygotes and (B) the corresponding genotyping results were shown.

Two major rescued features of *myoD* expression in the anterior somites are segmental and laterally-extended *myoD* pattern, compared (a–n) to (co). The *myoD* expression pattern in the anterior somites was asymmetrically (c, d, h, i) and symmetrically (a, e, f) rescued in *myoD*-overexpressed *mib*<sup>nn2002</sup> homozygotes, while (b, g) *myoD*-overexpressed *mib*<sup>nn2002</sup> homozygotes were still indistinguishable from control (co). The genomic fragments of *mib* 5' (amplified with *tfi91* primers), *mib* 3' (amplified with *ta52b* primers), and *foxc1a* (amplified with *foxc1a* primers) were not detected in the homozygous mutants, while the control fragments, *fih* (amplified with *fih* primers) and *vhl* (amplified with *vhl* primers), were detected in the embryos except for *vhl* PCR sample f and *fih* PCR sample n, which might be due to the DNA damage or cross-links that are generated by paraformaldehyde fixation during the WISH procedure<sup>[1]</sup>.

## $\gamma$ -H2AX staining

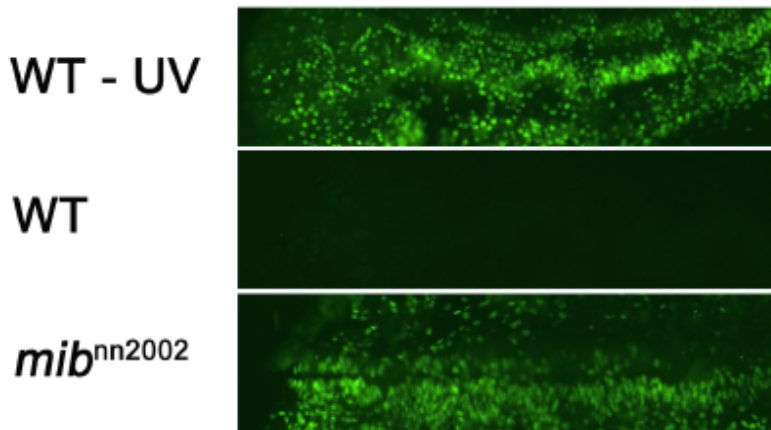

**Figure S14.**  $\gamma$ -H2AX staining is highly increased in *mib*<sup>nn2002</sup> mutants.  $\gamma$ -H2AX, representing the event of DNA damage, was only detected in *mib*<sup>nn2002</sup> mutants and UV exposed wt embryos (WT-UV).

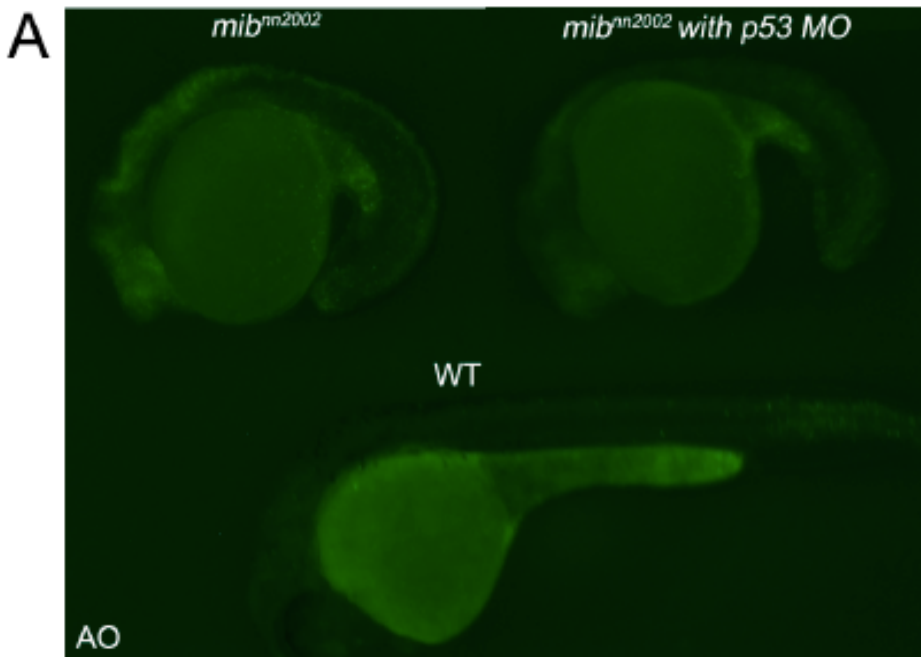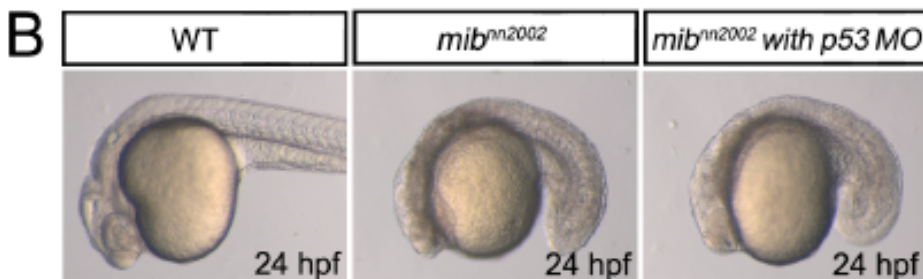

**Figure S15.** Cell death in *mib*<sup>nn2002</sup> mutants is *p53*-dependent. (A) Acridine orange (AO) staining in *mib*<sup>nn2002</sup>, *mib*<sup>nn2002</sup> injected with *p53* morpholino and WT. AO staining was partially reduced in *mib*<sup>nn2002</sup> mutants with *p53* morpholino injection. (B) Nomarski images of WT, *mib*<sup>nn2002</sup> and *mib*<sup>nn2002</sup> injected with *p53* morpholino. The deposition of dark granules in *mib*<sup>nn2002</sup> mutants was suppressed by *p53* down-regulation. This result suggests that the cell death in *mib*<sup>nn2002</sup> mutants is *p53*-dependent.

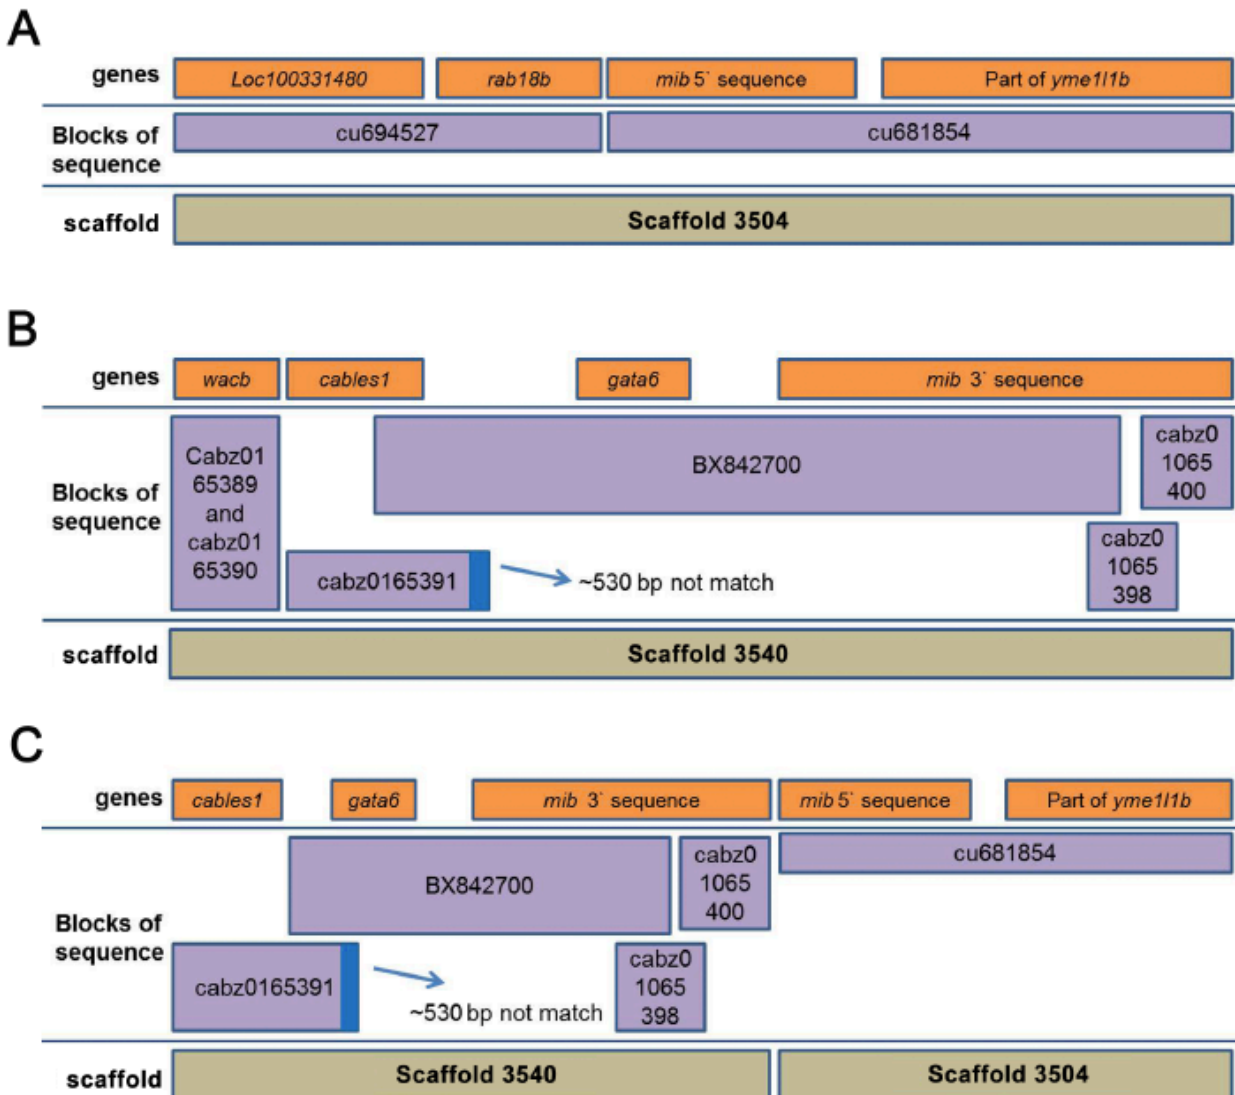

**Figure S16.** The assembly of *mib* genomic sequence.

(A) Scaffold 3504 of assembling 5' *mib* genomic sequence is illustrated. Scaffold 3504 contains cu694527 and cu681854 sequences. There is no overlap between these two sequences. (B) Scaffold 3540 of assembling of 3' *mib* genomic sequence is illustrated. Scaffold 3540 contains cabz0165389, cabz0165390, cabz0165391, BX842700, cabz01065398 and cabz01065400 sequences. There is no overlap between sequences coding for *wacb* and *cables1*. There is a 530 bp mismatch between cabz0165391 and BX842700. (C) Hypothetical assembly of *mib* genomic sequence is illustrated. In the hypothetical map, the *mib* is located between genes *gata6* and *yme111b*.

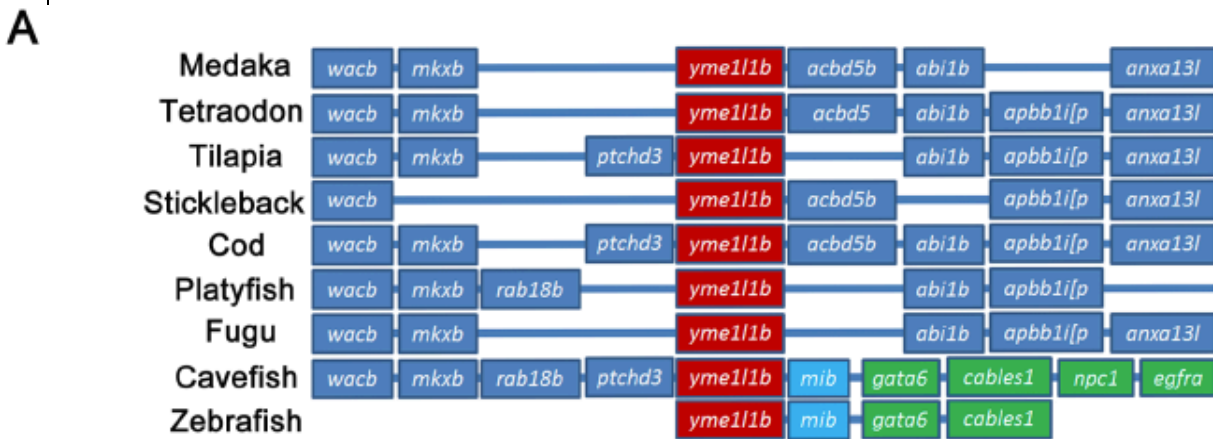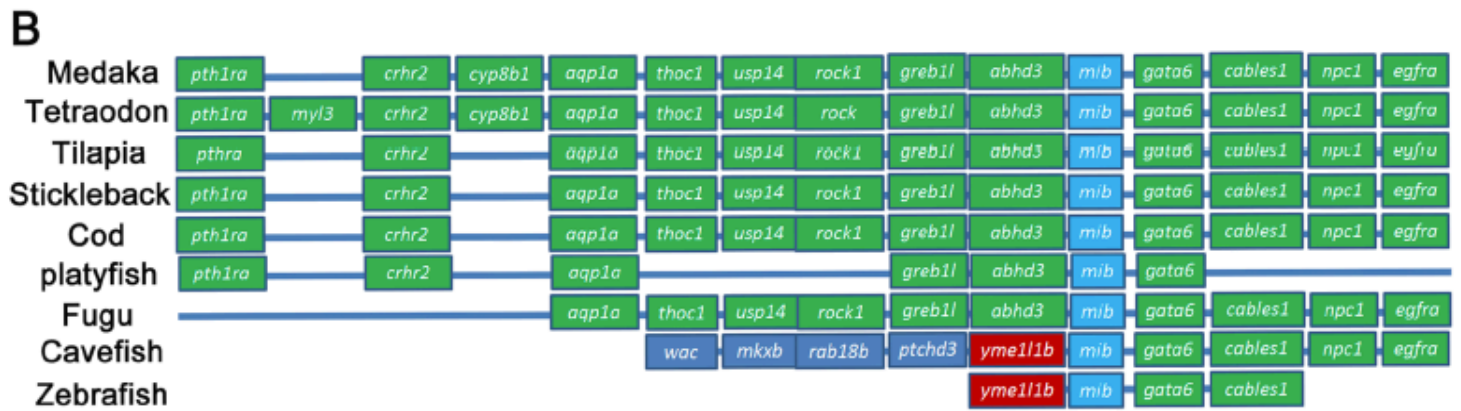

**Figure S17.** The synteny of genes near *mib* in different fish species.

The synteny in (A) is arranged by aligning the gene *yme1l1b*. The synteny in (B) is arranged by aligning the gene *mib*. The synteny of genes nearby *mib* in zebrafish is much more similar to that of cavefish.



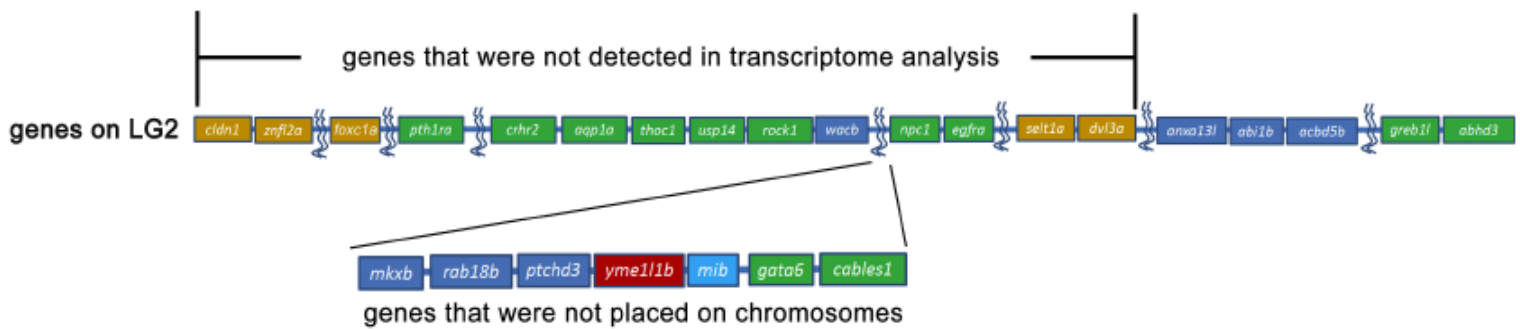

**Figure S18.** The hypothetical genomic sequence of zebrafish LG2 around *mib* locus.

The location of genes, *cldn1*, *znfl2a* and *foxc1a*, near the chromosome terminal are based on Zv9 zebrafish Ensembl sequence. The gene positions, such as *pth1a*, *crhr2*, *aqp1a*, *thoc1*, *usp14*, *rock1* and *wacb*, are based on the LG2 Ensembl sequence (supplementary Table 4), which match the gene synteny left to *greb1l* in Medaka, Tetarodon, Tilapia, Stickleback, Cod and Platyfish (supplementary Fig. 17B). This also suggests there is a recombination happened between *wacb* and *rock1* in zebrafish while it was compared with fishes like Medaka. Based on the synteny of cavefish in supplementary Fig. 17, genes, such as *mkxb*, *rab18b*, *ptchd3*, *yme11b*, *mib*, *gata6* and *cables1* were placed on the right hand side of *wacb* (these genes are not assembled in any LGs and their genomic DNA is not PCR-amplifiable in *mib*<sup>nm2002</sup> mutants). *npc1* and *egfra* were placed on the right hand side of the *mib* scaffold based on the synteny of Cavefish, although *egfra* is much closer to chromosome terminal than *npc1* in Zv9 Ensembl sequence. The location of *selt1a*, *dvl3a*, *anxa13l*, *abi1b*, *acbd5b*, *greb1l* and *abhd3* were based on the Zv9 Ensembl sequence. *anxa13l*, *abi1b* and *acbd5b* were still located near each other as expected (synteny from Medaka to *Fugu*, though *apbb1ip* is located in chromosome 24 in Zv9 Ensembl sequence). *greb1l* and *abhd3* are also located nearby position as expected in synteny. The genes much closer to chromosome terminal than *dvl3a* in the reconstituted hypothetical map are not detected by RNA-seq and genomic PCR.

## References

1. Clingenpeel, S., Schwientek, P., Hugenholtz, P. & Woyke, T. Effects of sample treatments on genome recovery via single-cell genomics. *ISME J.* **8**, 2546–2549 (2014).
